# Supplementary material for: MIDDAS-M: Motif-Independent De Novo Detection of Secondary Metabolite Gene Clusters through the Integration of Genome Sequencing and Transcriptome Data
Source: PLoS One. 2013 Dec 31;8(12):e84028. doi: 10.1371/journal.pone.0084028 (PMC3877130; doi:10.1371/journal.pone.0084028)
Supplement: Appendix S2 — The comprehensive MIDDAS-M prediction data for F. verticillioides (the “F.verticillioides” sheet) and A. flavus (the “A.flavus” sheet), the functional annotations of genes in or near the ustiloxin B cluster found by BLAST against UniProtKB (the “ust” sheet), and the result of antiSMASH prediciton for A. flavus in comparison to that of MIDDAS-M (the “antiSMASH.AF” sheet). (XLSX) [file pone.0084028.s002.xlsx]

## Sheet: F.verticillioides
				desc from: ./bi/fusarium_verticillioides_7600_3_genome_summary_per_gene.txt		Maximum score		Unique cluster (5%FPP:499.4)			SMURF
Gene	Description by BlastP against NR-AA (top hit)	Chromosome	Start	feature	Known cluster	Score	cccID	Absolute score	Size	cccID	Type	ID
FVEG_09964	major facilitator superfamily transporter [Glomerella graminicola M1.001]	1	824	hypothetical protein		84.2936	4	0	0	0	0	0
FVEG_09963	predicted protein [Verticillium albo-atrum VaMs.102]_x0001_gb|EEY15608.1| predicted protein [Verticillium albo-atrum VaMs.102]	1	3937	hypothetical protein		156.198	4	0	0	0	0	0
FVEG_09962	DUF341 domain-containing protein [Verticillium albo-atrum VaMs.102]_x0001_gb|EEY15607.1| DUF341 domain-containing protein [Verticillium albo-atrum VaMs.102]	1	5807	hypothetical protein		172.402	4	172.402	4	4	0	0
FVEG_09961	polyketide synthase [Gibberella moniliformis]	1	7368	hypothetical protein		118.526	4	172.402	4	4	0	0
FVEG_09960	polyketide synthase [Gibberella moniliformis]	1	8445	hypothetical protein		-37.8964	3	172.402	4	4	0	0
FVEG_09959	polyketide synthase [Gibberella moniliformis]	1	10374	hypothetical protein		-126.519	2	172.402	4	4	0	0
FVEG_09958	predicted protein [Nectria haematococca mpVI 77-13-4]_x0001_gb|EEU37657.1| predicted protein [Nectria haematococca mpVI 77-13-4]	1	17384	hypothetical protein		-25.1246	6	0	0	0	0	0
FVEG_09957	hypothetical protein NECHADRAFT_22286 [Nectria haematococca mpVI 77-13-4]_x0001_gb|EEU39553.1| hypothetical protein NECHADRAFT_22286 [Nectria haematococca mpVI 77-13-4]	1	19553	hypothetical protein		-29.3343	1	0	0	0	0	0
FVEG_09956	hypothetical protein FG01590.1 [Gibberella zeae PH-1]	1	20676	hypothetical protein		-32.5042	1	0	0	0	0	0
FVEG_09955	-	1	23728	hypothetical protein		-144.098	2	0	0	0	0	0
FVEG_09954	hypothetical protein SNOG_15102 [Phaeosphaeria nodorum SN15]_x0001_gb|EAT77645.2| hypothetical protein SNOG_15102 [Phaeosphaeria nodorum SN15]	1	25030	hypothetical protein		-5.11718	5	0	0	0	0	0
FVEG_09953	hypothetical protein FG04804.1 [Gibberella zeae PH-1]	1	28481	hypothetical protein		0	1	0	0	0	0	0
FVEG_09952	-	1	31449	hypothetical protein		-188.606	2	0	0	0	0	0
FVEG_09951	hypothetical protein FG01403.1 [Gibberella zeae PH-1]	1	34466	minor allergen Alt a 7		0	1	0	0	0	0	0
FVEG_09950	-	1	35744	hypothetical protein		-265.153	2	0	0	0	0	0
FVEG_09949	unnamed protein product [Aspergillus oryzae RIB40]	1	36887	hypothetical protein		-407.262	2	0	0	0	0	0
FVEG_09948	tyrosinase, putative [Metarhizium acridum CQMa 102]	1	39178	hypothetical protein		-476.672	2	0	0	0	0	0
FVEG_09947	feruloyl esterase [Grosmannia clavigera kw1407]	1	40913	hypothetical protein		-71.4636	1	0	0	0	0	0
FVEG_09946	hypothetical protein FG02134.1 [Gibberella zeae PH-1]	1	43714	hypothetical protein		-622.064	2	0	0	0	0	0
FVEG_09945	hypothetical protein MAA_08647 [Metarhizium anisopliae ARSEF 23]	1	47812	hypothetical protein		-940.081	2	0	0	0	0	0
FVEG_09943	predicted protein [Verticillium albo-atrum VaMs.102]_x0001_gb|EEY16981.1| predicted protein [Verticillium albo-atrum VaMs.102]	1	60023	hypothetical protein		100.634	6	0	0	0	0	0
FVEG_09942	-	1	61470	hypothetical protein		-780.257	2	0	0	0	0	0
FVEG_09941	ABC multidrug transporter [Grosmannia clavigera kw1407]	1	63203	hypothetical protein		-1040.09	2	0	0	0	0	0
FVEG_09940	MFS transporter, putative [Aspergillus clavatus NRRL 1]_x0001_gb|EAW08898.1| MFS transporter, putative [Aspergillus clavatus NRRL 1]	1	68934	hypothetical protein		-94.0762	3	0	0	0	0	0
FVEG_09939	hypothetical protein NFIA_100180 [Neosartorya fischeri NRRL 181]_x0001_gb|EAW20381.1| conserved hypothetical protein [Neosartorya fischeri NRRL 181]	1	71489	hypothetical protein		0	1	0	0	0	0	0
FVEG_09938	-	1	73283	hypothetical protein		-61.9916	3	0	0	0	0	0
FVEG_09937	hypothetical protein NECHADRAFT_53189 [Nectria haematococca mpVI 77-13-4]_x0001_gb|EEU36157.1| hypothetical protein NECHADRAFT_53189 [Nectria haematococca mpVI 77-13-4]	1	75310	hypothetical protein		-3.21034	6	0	0	0	0	0
FVEG_09936	hypothetical protein FG10417.1 [Gibberella zeae PH-1]	1	77648	hypothetical protein		-290.626	2	0	0	0	0	0
FVEG_09935	-	1	79986	hypothetical protein		-61.104	1	0	0	0	0	0
FVEG_09934	beta-hexosaminidase, putative [Penicillium marneffei ATCC 18224]_x0001_gb|EEA21340.1| beta-hexosaminidase, putative [Penicillium marneffei ATCC 18224]	1	81575	hypothetical protein		-375.715	2	0	0	0	0	0
FVEG_09933	O-methyltransferase, family 3 [Glomerella graminicola M1.001]	1	83222	hypothetical protein		-98.4118	3	0	0	0	0	0
FVEG_09932	hypothetical protein MYCGRDRAFT_43643 [Mycosphaerella graminicola IPO323]	1	84326	hypothetical protein		-398.025	2	0	0	0	0	0
FVEG_09931	membrane transporter [Grosmannia clavigera kw1407]	1	86684	hypothetical protein		-432.522	2	0	0	0	0	0
FVEG_09930	flavin containing amine oxidoreductase [Grosmannia clavigera kw1407]	1	88801	hypothetical protein		-423.576	2	0	0	0	0	0
FVEG_09929	-	1	92354	hypothetical protein		0	1	0	0	0	0	0
FVEG_09928	-	1	93060	hypothetical protein		-348.188	2	0	0	0	0	0
FVEG_09927	-	1	94865	hypothetical protein		-382.862	2	0	0	0	0	0
FVEG_09926	hypothetical protein ANI_1_468104 [Aspergillus niger CBS 513.88]	1	96569	hypothetical protein		-180.645	3	0	0	0	0	0
FVEG_09925	-	1	99061	hypothetical protein		-447.369	2	0	0	0	0	0
FVEG_09924	-	1	99885	hypothetical protein		-528.163	2	0	0	0	0	0
FVEG_09923	hypothetical protein NECHADRAFT_75781 [Nectria haematococca mpVI 77-13-4]_x0001_gb|EEU49028.1| hypothetical protein NECHADRAFT_75781 [Nectria haematococca mpVI 77-13-4]	1	101161	hypothetical protein		-619.624	2	0	0	0	0	0
FVEG_09922	-	1	102771	hypothetical protein		-1056.56	2	0	0	0	0	0
FVEG_09921	hypothetical protein NECHADRAFT_87715 [Nectria haematococca mpVI 77-13-4]_x0001_gb|EEU41538.1| hypothetical protein NECHADRAFT_87715 [Nectria haematococca mpVI 77-13-4]	1	108275	hypothetical protein		-2129.16	2	2129.16	3	2	0	0
FVEG_09920	hypothetical protein NECHADRAFT_82808 [Nectria haematococca mpVI 77-13-4]_x0001_gb|EEU43482.1| hypothetical protein NECHADRAFT_82808 [Nectria haematococca mpVI 77-13-4]	1	111771	hypothetical protein		0	1	2129.16	3	2	0	0
FVEG_09919	hypothetical protein FG01770.1 [Gibberella zeae PH-1]	1	113357	hypothetical protein		1.01097	6	2129.16	3	2	0	0
FVEG_09918	hypothetical protein FG01769.1 [Gibberella zeae PH-1]	1	116095	hypothetical protein		-161.425	2	0	0	0	0	0
FVEG_09917	hypothetical protein FG01768.1 [Gibberella zeae PH-1]	1	118675	hypothetical protein		-164.172	2	0	0	0	0	0
FVEG_09916	-	1	121079	hypothetical protein		-1.49759	6	0	0	0	0	0
FVEG_09915	-	1	126044	hypothetical protein		0	1	0	0	0	0	0
FVEG_09914	-	1	129389	hypothetical protein		-244.315	2	244.315	7	2	0	0
FVEG_09913	hypothetical protein NECHADRAFT_101762 [Nectria haematococca mpVI 77-13-4]_x0001_gb|EEU35952.1| hypothetical protein NECHADRAFT_101762 [Nectria haematococca mpVI 77-13-4]	1	132858	hypothetical protein		0	1	244.315	7	2	0	0
FVEG_09912	hypothetical protein NECHADRAFT_74001 [Nectria haematococca mpVI 77-13-4]_x0001_gb|EEU44018.1| hypothetical protein NECHADRAFT_74001 [Nectria haematococca mpVI 77-13-4]	1	136889	hypothetical protein		0	1	244.315	7	2	0	0
FVEG_09911	hypothetical protein NECHADRAFT_29730 [Nectria haematococca mpVI 77-13-4]_x0001_gb|EEU44019.1| hypothetical protein NECHADRAFT_29730 [Nectria haematococca mpVI 77-13-4]	1	138888	hypothetical protein		-70.5066	2	244.315	7	2	0	0
FVEG_09910	hypothetical protein NECHADRAFT_74003 [Nectria haematococca mpVI 77-13-4]_x0001_gb|EEU44020.1| hypothetical protein NECHADRAFT_74003 [Nectria haematococca mpVI 77-13-4]	1	140523	hypothetical protein		-57.727	2	244.315	7	2	0	0
FVEG_09909	hypothetical protein NECHADRAFT_30230 [Nectria haematococca mpVI 77-13-4]_x0001_gb|EEU44021.1| hypothetical protein NECHADRAFT_30230 [Nectria haematococca mpVI 77-13-4]	1	143325	hypothetical protein		-21.8721	3	244.315	7	2	0	0
FVEG_09908	hypothetical protein NECHADRAFT_30212 [Nectria haematococca mpVI 77-13-4]_x0001_gb|EEU43816.1| hypothetical protein NECHADRAFT_30212 [Nectria haematococca mpVI 77-13-4]	1	144762	hypothetical protein		8.23785	4	244.315	7	2	0	0
FVEG_09907	hypothetical protein NECHADRAFT_74006 [Nectria haematococca mpVI 77-13-4]_x0001_gb|EEU44022.1| hypothetical protein NECHADRAFT_74006 [Nectria haematococca mpVI 77-13-4]	1	147099	hypothetical protein		0	1	0	0	0	0	0
FVEG_09906	hypothetical protein FG01757.1 [Gibberella zeae PH-1]	1	149460	hypothetical protein		9.29579	4	0	0	0	0	0
FVEG_09905	hypothetical protein NECHADRAFT_74008 [Nectria haematococca mpVI 77-13-4]_x0001_gb|EEU44023.1| hypothetical protein NECHADRAFT_74008 [Nectria haematococca mpVI 77-13-4]	1	150570	hypothetical protein		-16.9604	1	0	0	0	0	0
FVEG_09904	hypothetical protein NECHADRAFT_89588 [Nectria haematococca mpVI 77-13-4]_x0001_gb|EEU43817.1| hypothetical protein NECHADRAFT_89588 [Nectria haematococca mpVI 77-13-4]	1	151486	hypothetical protein		13.3985	4	0	0	0	0	0
FVEG_09903	hypothetical protein NECHADRAFT_74010 [Nectria haematococca mpVI 77-13-4]_x0001_gb|EEU43818.1| hypothetical protein NECHADRAFT_74010 [Nectria haematococca mpVI 77-13-4]	1	153353	hypothetical protein		-20.9765	1	0	0	0	0	0
FVEG_09902	ATPase [Glomerella graminicola M1.001]	1	154692	hypothetical protein		0	1	0	0	0	0	0
FVEG_09901	-	1	156630	hypothetical protein		-15.3132	1	0	0	0	0	0
FVEG_09900	hypothetical protein CMQ_4268 [Grosmannia clavigera kw1407]	1	158273	hypothetical protein		0	1	0	0	0	0	0
FVEG_09899	hypothetical protein FG01743.1 [Gibberella zeae PH-1]	1	159575	acetyl-coenzyme A synthetase		-1.84555	5	0	0	0	0	0
FVEG_09898	predicted protein [Nectria haematococca mpVI 77-13-4]_x0001_gb|EEU35813.1| predicted protein [Nectria haematococca mpVI 77-13-4]	1	163905	hypothetical protein		31.0341	4	0	0	0	0	0
FVEG_09897	lipoxygenase [Gibberella moniliformis]	1	166065	hypothetical protein		61.1786	4	0	0	0	0	0
FVEG_09896	predicted protein [Nectria haematococca mpVI 77-13-4]_x0001_gb|EEU39453.1| predicted protein [Nectria haematococca mpVI 77-13-4]	1	170963	hypothetical protein		57.9193	4	0	0	0	0	0
FVEG_09895	unnamed protein product [Aspergillus oryzae RIB40]	1	172767	hypothetical protein		-23.9162	1	0	0	0	0	0
FVEG_09894	hypothetical protein FG01745.1 [Gibberella zeae PH-1]	1	181099	hypothetical protein		-36.9981	2	0	0	0	0	0
FVEG_09893	hypothetical protein FG01746.1 [Gibberella zeae PH-1]	1	183165	hypothetical protein		-29.3213	4	0	0	0	0	0
FVEG_09892	-	1	184554	hypothetical protein		-31.402	2	0	0	0	0	0
FVEG_09891	hypothetical protein FG01753.1 [Gibberella zeae PH-1]	1	186583	hypothetical protein		-48.1862	2	0	0	0	0	0
FVEG_09890	hypothetical protein FG08071.1 [Gibberella zeae PH-1]	1	189511	hypothetical protein		-50.2666	1	0	0	0	0	0
FVEG_09889	-	1	191913	hypothetical protein		-44.2165	1	0	0	0	0	0
FVEG_09888	hypothetical protein FG11425.1 [Gibberella zeae PH-1]	1	193328	hypothetical protein		49.9514	4	0	0	0	0	0
FVEG_09887	Ankyrin repeat protein [Metarhizium anisopliae ARSEF 23]	1	194796	hypothetical protein		0	1	0	0	0	0	0
FVEG_09886	hypothetical protein FG03810.1 [Gibberella zeae PH-1]	1	196654	hypothetical protein		35.5127	4	0	0	0	0	0
FVEG_09885	hypothetical protein NECHADRAFT_44851 [Nectria haematococca mpVI 77-13-4]_x0001_gb|EEU35092.1| hypothetical protein NECHADRAFT_44851 [Nectria haematococca mpVI 77-13-4]	1	200193	hypothetical protein		-1.55505	5	0	0	0	0	0
FVEG_09884	-	1	203620	hypothetical protein		44.1978	4	0	0	0	0	0
FVEG_09883	hypothetical protein NECHADRAFT_97041 [Nectria haematococca mpVI 77-13-4]_x0001_gb|EEU35420.1| hypothetical protein NECHADRAFT_97041 [Nectria haematococca mpVI 77-13-4]	1	204505	hypothetical protein		99.0933	4	99.0933	4	4	0	0
FVEG_09882	hypothetical protein NECHADRAFT_97040 [Nectria haematococca mpVI 77-13-4]_x0001_gb|EEU35454.1| hypothetical protein NECHADRAFT_97040 [Nectria haematococca mpVI 77-13-4]	1	206701	hypothetical protein		0	1	99.0933	4	4	0	0
FVEG_09881	hypothetical protein NECHADRAFT_49787 [Nectria haematococca mpVI 77-13-4]_x0001_gb|EEU36003.1| hypothetical protein NECHADRAFT_49787 [Nectria haematococca mpVI 77-13-4]	1	209522	hypothetical protein		-17.2808	3	99.0933	4	4	0	0
FVEG_09880	hypothetical protein NECHADRAFT_85575 [Nectria haematococca mpVI 77-13-4]_x0001_gb|EEU34273.1| hypothetical protein NECHADRAFT_85575 [Nectria haematococca mpVI 77-13-4]	1	211368	hypothetical protein		2.35409	2	99.0933	4	4	0	0
FVEG_09879	hypothetical protein FG03880.1 [Gibberella zeae PH-1]	1	213719	hypothetical protein		11.7451	5	0	0	0	0	0
FVEG_09878	hypothetical protein FG03879.1 [Gibberella zeae PH-1]	1	214885	3-dehydroshikimate dehydratase		12.5637	2	0	0	0	0	0
FVEG_09877	hypothetical protein NECHADRAFT_51162 [Nectria haematococca mpVI 77-13-4]_x0001_gb|EEU35428.1| hypothetical protein NECHADRAFT_51162 [Nectria haematococca mpVI 77-13-4]	1	216248	hypothetical protein		0	1	0	0	0	0	0
FVEG_09876	hypothetical protein FG03877.1 [Gibberella zeae PH-1]	1	222081	hypothetical protein		26.6447	2	0	0	0	0	0
FVEG_09875	hypothetical protein MAA_01026 [Metarhizium anisopliae ARSEF 23]	1	223903	hypothetical protein		0	1	0	0	0	0	0
FVEG_09874	hypothetical protein MGG_14513 [Magnaporthe oryzae 70-15]_x0001_gb|EDK06722.1| hypothetical protein MGG_14513 [Magnaporthe oryzae 70-15]	1	225059	hypothetical protein		30.7865	4	0	0	0	0	0
FVEG_09873	diaminopimelate epimerase [Burkholderia sp. 383]_x0001_gb|ABB10212.1| diaminopimelate epimerase [Burkholderia sp. 383]	1	228097	hypothetical protein		37.2393	4	37.2393	3	4	0	0
FVEG_09872	melibiose subfamily protein [Aspergillus oryzae RIB40]	1	229582	hypothetical protein		-28.4777	5	37.2393	3	4	0	0
FVEG_09871	hexose carrier protein [Aspergillus oryzae RIB40]_x0001_dbj|BAE64622.1| unnamed protein product [Aspergillus oryzae RIB40]	1	232714	hypothetical protein		0	1	37.2393	3	4	OTHER	17
FVEG_09870	hypothetical protein ANI_1_1164164 [Aspergillus niger CBS 513.88]	1	234731	hypothetical protein		-8.79738	6	0	0	0	OTHER	17
FVEG_09869	-	1	239030	hypothetical protein		-28.4975	5	0	0	0	OTHER	17
FVEG_09868	short-chain dehydrogenase [Aspergillus oryzae RIB40]	1	240003	hypothetical protein		0	1	0	0	0	OTHER	17
FVEG_09867	conserved hypothetical protein [Aspergillus terreus NIH2624]_x0001_gb|EAU36221.1| conserved hypothetical protein [Aspergillus terreus NIH2624]	1	241029	hypothetical protein		4.25056	4	0	0	0	OTHER	17
FVEG_09866	predicted protein [Chaetomium globosum CBS 148.51]_x0001_gb|EAQ91559.1| predicted protein [Chaetomium globosum CBS 148.51]	1	243474	hypothetical protein		-15.9342	3	0	0	0	OTHER	17
FVEG_09865	predicted protein [Aspergillus terreus NIH2624]_x0001_gb|EAU36219.1| predicted protein [Aspergillus terreus NIH2624]	1	245510	hypothetical protein		-15.3208	2	0	0	0	OTHER	17
FVEG_09864	predicted protein [Aspergillus terreus NIH2624]_x0001_gb|EAU36218.1| predicted protein [Aspergillus terreus NIH2624]	1	247391	hypothetical protein		-21.8881	5	0	0	0	OTHER	17
FVEG_09863	major facilitator superfamily domain containing protein 5 [Pyrenophora tritici-repentis Pt-1C-BFP]_x0001_gb|EDU49331.1| major facilitator superfamily domain containing protein 5 [Pyrenophora tritici-repentis Pt-1C-BFP]	1	255199	hypothetical protein		-14.9237	6	0	0	0	OTHER	17
FVEG_09862	hypothetical protein CPC735_027820 [Coccidioides posadasii C735 delta SOWgp]_x0001_gb|EER27446.1| hypothetical protein CPC735_027820 [Coccidioides posadasii C735 delta SOWgp]	1	257498	hypothetical protein		-22.0892	5	0	0	0	0	0
FVEG_09861	hypothetical protein FG07993.1 [Gibberella zeae PH-1]	1	258833	hypothetical protein		-23.9191	6	0	0	0	0	0
FVEG_09860	-	1	264619	hypothetical protein		-44.2982	3	0	0	0	0	0
FVEG_09859	-	1	266661	hypothetical protein		0	1	0	0	0	0	0
FVEG_09858	predicted protein [Trichoderma reesei QM6a]	1	276743	hypothetical protein		-27.572	3	0	0	0	0	0
FVEG_09857	hypothetical protein MGYG_01531 [Arthroderma gypseum CBS 118893]_x0001_gb|EFQ98504.1| hypothetical protein MGYG_01531 [Arthroderma gypseum CBS 118893]	1	278305	hypothetical protein		-34.2697	3	0	0	0	0	0
FVEG_09856	glutathione S-transferase [Metarhizium acridum CQMa 102]	1	285699	hypothetical protein		-36.0768	3	0	0	0	0	0
FVEG_09855	hypothetical protein NCU11292 [Neurospora crassa OR74A]_x0001_gb|EDO65196.1| predicted protein [Neurospora crassa OR74A]	1	287514	hypothetical protein		0	1	0	0	0	0	0
FVEG_09854	hypothetical protein FG00024.1 [Gibberella zeae PH-1]	1	288375	hypothetical protein		-31.4127	3	0	0	0	0	0
FVEG_09853	nucleoside-diphosphate-sugar epimerase [Aspergillus niger CBS 513.88]_x0001_emb|CAK44991.1| unnamed protein product [Aspergillus niger]	1	292052	hypothetical protein		-99.3135	3	99.3135	4	3	0	0
FVEG_09852	-	1	294903	hypothetical protein		-48.5286	3	99.3135	4	3	0	0
FVEG_09851	hypothetical protein FG01785.1 [Gibberella zeae PH-1]	1	297820	hypothetical protein		-34.1502	3	99.3135	4	3	0	0
FVEG_09850	unnamed protein product [Fusarium oxysporum]	1	299531	hypothetical protein		-13.4002	2	99.3135	4	3	0	0
FVEG_09849	hypothetical protein DFA_10934 [Dictyostelium fasciculatum]	1	302104	hypothetical protein		4.83378	4	0	0	0	0	0
FVEG_09848	hypothetical protein FG01782.1 [Gibberella zeae PH-1]	1	304139	hypothetical protein		-2.94507	3	0	0	0	0	0
FVEG_09847	-	1	305240	hypothetical protein		13.136	4	0	0	0	0	0
FVEG_09846	-	1	306989	hypothetical protein		-19.4419	6	0	0	0	0	0
FVEG_09845	hypothetical protein FG01756.1 [Gibberella zeae PH-1]	1	307748	hypothetical protein		-30.3344	6	0	0	0	0	0
FVEG_09844	-	1	310340	hypothetical protein		-49.5134	6	0	0	0	0	0
FVEG_09843	hypothetical protein NECHADRAFT_106617 [Nectria haematococca mpVI 77-13-4]_x0001_gb|EEU33562.1| hypothetical protein NECHADRAFT_106617 [Nectria haematococca mpVI 77-13-4]	1	312063	hypothetical protein		-97.118	6	97.118	5	6	0	0
FVEG_09842	MFS sugar transporter, putative [Aspergillus flavus NRRL3357]_x0001_gb|EED54303.1| MFS sugar transporter, putative [Aspergillus flavus NRRL3357]	1	315442	hypothetical protein		-28.0521	3	97.118	5	6	0	0
FVEG_09841	hypothetical protein ANI_1_3352024 [Aspergillus niger CBS 513.88]_x0001_emb|CAK48902.1| unnamed protein product [Aspergillus niger]	1	317665	hypothetical protein		45.3824	4	97.118	5	6	0	0
FVEG_09840	-	1	319658	hypothetical protein		0	1	97.118	5	6	0	0
FVEG_09839	-	1	323835	hypothetical protein		0	1	97.118	5	6	0	0
FVEG_09838	hypothetical protein SNOG_13573 [Phaeosphaeria nodorum SN15]_x0001_gb|EAT79020.2| hypothetical protein SNOG_13573 [Phaeosphaeria nodorum SN15]	1	324873	hypothetical protein		6.6896	4	6.6896	4	4	0	0
FVEG_09837	hypothetical protein NECHADRAFT_12886 [Nectria haematococca mpVI 77-13-4]_x0001_gb|EEU40348.1| hypothetical protein NECHADRAFT_12886 [Nectria haematococca mpVI 77-13-4]	1	326847	hypothetical protein		0	1	6.6896	4	4	0	0
FVEG_09836	-	1	330004	hypothetical protein		-1.74026	5	6.6896	4	4	0	0
FVEG_09835	hypothetical protein FG03889.1 [Gibberella zeae PH-1]	1	334912	hypothetical protein		-0.439452	2	6.6896	4	4	0	0
FVEG_09834	hypothetical protein FG01731.1 [Gibberella zeae PH-1]	1	339150	hypothetical protein		0	1	0	0	0	0	0
FVEG_09833	hypothetical protein NECHADRAFT_89598 [Nectria haematococca mpVI 77-13-4]_x0001_gb|EEU44031.1| hypothetical protein NECHADRAFT_89598 [Nectria haematococca mpVI 77-13-4]	1	341925	hypothetical protein		-3.85435	4	0	0	0	0	0
FVEG_09832	hypothetical protein FG01732.1 [Gibberella zeae PH-1]	1	343446	hypothetical protein		-3.23478	5	0	0	0	0	0
FVEG_09831	hypothetical protein FG01732.1 [Gibberella zeae PH-1]	1	346433	hypothetical protein		-5.40044	6	0	0	0	0	0
FVEG_09830	hypothetical protein FG01733.1 [Gibberella zeae PH-1]	1	349337	hypothetical protein		0	1	0	0	0	0	0
FVEG_09829	hypothetical protein FG01734.1 [Gibberella zeae PH-1]	1	354523	hypothetical protein		0	1	0	0	0	0	0
FVEG_09828	hypothetical protein FG08025.1 [Gibberella zeae PH-1]	1	357215	hypothetical protein		8.18901	4	0	0	0	0	0
FVEG_09827	hypothetical protein FG01727.1 [Gibberella zeae PH-1]	1	361746	hypothetical protein		0.428086	2	0	0	0	0	0
FVEG_09826	hypothetical protein FG01728.1 [Gibberella zeae PH-1]	1	365897	hypothetical protein		9.01628	4	0	0	0	0	0
FVEG_09825	hypothetical protein FG01729.1 [Gibberella zeae PH-1]	1	367381	hypothetical protein		0.727722	2	0	0	0	0	0
FVEG_09824	hypothetical protein FG01730.1 [Gibberella zeae PH-1]	1	368646	D-amino-acid oxidase		0	1	0	0	0	0	0
FVEG_09823	-	1	370650	hypothetical protein		-6.78895	5	0	0	0	0	0
FVEG_09822	hypothetical protein FG01735.1 [Gibberella zeae PH-1]	1	372356	hypothetical protein		0	1	0	0	0	0	0
FVEG_09821	-	1	375960	hypothetical protein		-16.0524	6	0	0	0	0	0
FVEG_09820	-	1	379875	hypothetical protein		0.814399	2	0	0	0	0	0
FVEG_09819	hypothetical protein FG01718.1 [Gibberella zeae PH-1]	1	382344	hypothetical protein		-11.7112	5	0	0	0	0	0
FVEG_09818	hypothetical protein FG01717.1 [Gibberella zeae PH-1]	1	383509	hypothetical protein		-5.7003	6	0	0	0	0	0
FVEG_09817	hypothetical protein NECHADRAFT_30339 [Nectria haematococca mpVI 77-13-4]_x0001_gb|EEU43834.1| hypothetical protein NECHADRAFT_30339 [Nectria haematococca mpVI 77-13-4]	1	387569	hypothetical protein		0	1	0	0	0	0	0
FVEG_09816	hypothetical protein FG01715.1 [Gibberella zeae PH-1]	1	389572	hypothetical protein		-3.74687	3	0	0	0	0	0
FVEG_09815	-	1	393013	hypothetical protein		-6.63465	5	0	0	0	0	0
FVEG_09814	hypothetical protein FG01714.1 [Gibberella zeae PH-1]	1	394885	hypothetical protein		0	1	0	0	0	0	0
FVEG_09813	hypothetical protein FG01713.1 [Gibberella zeae PH-1]	1	397395	hypothetical protein		-9.02003	5	0	0	0	0	0
FVEG_09812	hypothetical protein FG01712.1 [Gibberella zeae PH-1]	1	399715	hypothetical protein		-4.40003	6	0	0	0	0	0
FVEG_09811	hypothetical protein FG01711.1 [Gibberella zeae PH-1]	1	401653	hypothetical protein		0	1	0	0	0	0	0
FVEG_09810	hypothetical protein FG01710.1 [Gibberella zeae PH-1]_x0001_sp|Q4IM48.1|MCH1_GIBZE RecName: Full=Probable transporter MCH1	1	403859	hypothetical protein		-14.6807	5	0	0	0	0	0
FVEG_09809	-	1	409010	hypothetical protein		-4.6134	3	0	0	0	0	0
FVEG_09808	hypothetical protein FG01709.1 [Gibberella zeae PH-1]	1	412881	hypothetical protein		0	1	0	0	0	0	0
FVEG_09807	hypothetical protein MAC_09590 [Metarhizium acridum CQMa 102]	1	415997	hypothetical protein		7.64984	2	0	0	0	0	0
FVEG_09806	hypothetical protein FG01708.1 [Gibberella zeae PH-1]	1	417552	hypothetical protein		7.51788	4	0	0	0	0	0
FVEG_09805	-	1	420732	hypothetical protein		-39.3228	5	0	0	0	0	0
FVEG_09804	-	1	423553	hypothetical protein		-40.216	5	0	0	0	0	0
FVEG_09803	-	1	435693	hypothetical protein		-42.8881	5	0	0	0	0	0
FVEG_09802	hypothetical protein FG01705.1 [Gibberella zeae PH-1]	1	439499	hypothetical protein		-11.3338	3	0	0	0	0	0
FVEG_09801	hypothetical protein FG01704.1 [Gibberella zeae PH-1]	1	442249	hypothetical protein		-1.47118	6	0	0	0	0	0
FVEG_09800	hypothetical protein FG01704.1 [Gibberella zeae PH-1]	1	444033	hypothetical protein		-0.929747	4	0	0	0	0	0
FVEG_09799	predicted protein [Nectria haematococca mpVI 77-13-4]_x0001_gb|EEU44046.1| predicted protein [Nectria haematococca mpVI 77-13-4]	1	445278	pH-response regulator protein palA/rim-20		-94.6811	2	0	0	0	0	0
FVEG_09798	hypothetical protein MAC_09826 [Metarhizium acridum CQMa 102]	1	457375	hypothetical protein		-154.325	2	0	0	0	0	0
FVEG_09797	hypothetical protein FG01702.1 [Gibberella zeae PH-1]	1	459300	hypothetical protein		-144.712	2	0	0	0	0	0
FVEG_09796	hypothetical protein FG01701.1 [Gibberella zeae PH-1]	1	461753	hypothetical protein		0	1	0	0	0	0	0
FVEG_09795	metalloprotease [Verticillium albo-atrum VaMs.102]_x0001_gb|EEY17062.1| metalloprotease [Verticillium albo-atrum VaMs.102]	1	463698	hypothetical protein		0	1	0	0	0	0	0
FVEG_09794	-	1	466460	hypothetical protein		-29.189	5	0	0	0	0	0
FVEG_09793	-	1	472893	hypothetical protein		-31.7746	5	0	0	0	0	0
FVEG_09792	predicted protein [Aspergillus terreus NIH2624]_x0001_gb|EAU30713.1| predicted protein [Aspergillus terreus NIH2624]	1	473952	hypothetical protein		-18.3054	1	0	0	0	0	0
FVEG_09791	-	1	476320	hypothetical protein		0	1	0	0	0	0	0
FVEG_09790	-	1	479921	hypothetical protein		-28.2222	5	0	0	0	0	0
FVEG_09789	-	1	485004	hypothetical protein		-33.7389	5	0	0	0	0	0
FVEG_09788	hypothetical protein FG01677.1 [Gibberella zeae PH-1]	1	487802	hypothetical protein		12.4867	2	0	0	0	0	0
FVEG_09787	hypothetical protein NECHADRAFT_90164 [Nectria haematococca mpVI 77-13-4]_x0001_gb|EEU47912.1| hypothetical protein NECHADRAFT_90164 [Nectria haematococca mpVI 77-13-4]	1	490010	hypothetical protein		-34.6745	5	0	0	0	0	0
FVEG_09786	hypothetical protein FG01687.1 [Gibberella zeae PH-1]	1	493180	hypothetical protein		7.33698	1	0	0	0	0	0
FVEG_09785	hypothetical protein FG01686.1 [Gibberella zeae PH-1]	1	494954	hypothetical protein		14.5676	6	0	0	0	0	0
FVEG_09784	hypothetical protein FG01689.1 [Gibberella zeae PH-1]	1	496392	hypothetical protein		32.5046	5	0	0	0	0	0
FVEG_09783	kinesin [Gibberella moniliformis]	1	497705	hypothetical protein		17.49	1	0	0	0	0	0
FVEG_09782	hypothetical protein FG01691.1 [Gibberella zeae PH-1]	1	507063	hypothetical protein		-67.6382	5	0	0	0	0	0
FVEG_09781	hypothetical protein FG01693.1 [Gibberella zeae PH-1]	1	509097	hypothetical protein		-110.005	5	0	0	0	0	0
FVEG_09780	hypothetical protein FG01694.1 [Gibberella zeae PH-1]	1	515940	hypothetical protein		-18.7101	3	0	0	0	0	0
FVEG_09779	hypothetical protein FG01695.1 [Gibberella zeae PH-1]	1	517644	hypothetical protein		-845.738	5	845.738	3	5	0	0
FVEG_09778	hypothetical protein FG01696.1 [Gibberella zeae PH-1]	1	518752	hypothetical protein		-18.0983	3	845.738	3	5	0	0
FVEG_09777	hypothetical protein NECHADRAFT_98506 [Nectria haematococca mpVI 77-13-4]_x0001_gb|EEU43847.1| hypothetical protein NECHADRAFT_98506 [Nectria haematococca mpVI 77-13-4]	1	519943	hypothetical protein		1.58514	4	845.738	3	5	0	0
FVEG_09776	hypothetical protein FG01698.1 [Gibberella zeae PH-1]	1	523527	hypothetical protein		-13.6875	5	0	0	0	0	0
FVEG_09775	hypothetical protein FG01699.1 [Gibberella zeae PH-1]	1	525505	DNA repair protein rad32		-6.13251	6	0	0	0	0	0
FVEG_09774	hypothetical protein FG01700.1 [Gibberella zeae PH-1]	1	529505	hypothetical protein		-13.0543	5	0	0	0	0	0
FVEG_09773	hypothetical protein NECHADRAFT_102931 [Nectria haematococca mpVI 77-13-4]_x0001_gb|EEU44056.1| hypothetical protein NECHADRAFT_102931 [Nectria haematococca mpVI 77-13-4]	1	531768	hypothetical protein		52.1795	4	0	0	0	0	0
FVEG_09772	hypothetical protein FG01685.1 [Gibberella zeae PH-1]	1	537253	hypothetical protein		0	1	0	0	0	0	0
FVEG_09771	-	1	540514	hypothetical protein		0	1	0	0	0	0	0
FVEG_09770	hypothetical protein FG01660.1 [Gibberella zeae PH-1]	1	544037	hypothetical protein		-9.61467	5	0	0	0	0	0
FVEG_09769	hypothetical protein FG01659.1 [Gibberella zeae PH-1]	1	545054	hypothetical protein		-10.4619	5	0	0	0	0	0
FVEG_09768	arg-6 protein [Metarhizium anisopliae ARSEF 23]	1	547045	hypothetical protein		2.92151	2	0	0	0	0	0
FVEG_09767	stalk rot protein [Gibberella moniliformis]	1	548907	striatin Pro11		0	1	0	0	0	0	0
FVEG_09766	hypothetical protein NECHADRAFT_74138 [Nectria haematococca mpVI 77-13-4]_x0001_gb|EEU43880.1| hypothetical protein NECHADRAFT_74138 [Nectria haematococca mpVI 77-13-4]	1	552375	hypothetical protein		3.30544	1	0	0	0	0	0
FVEG_09765	hypothetical protein NECHADRAFT_65111 [Nectria haematococca mpVI 77-13-4]_x0001_gb|EEU43879.1| hypothetical protein NECHADRAFT_65111 [Nectria haematococca mpVI 77-13-4]	1	553941	hypothetical protein		-2.31343	6	0	0	0	0	0
FVEG_09764	-	1	555821	hypothetical protein		-41.2941	5	0	0	0	0	0
FVEG_09763	hypothetical protein FG01669.1 [Gibberella zeae PH-1]	1	558680	hypothetical protein		-5.13671	6	0	0	0	0	0
FVEG_09762	hypothetical protein FG01670.1 [Gibberella zeae PH-1]	1	560055	hypothetical protein		-36.3645	5	0	0	0	0	0
FVEG_09761	hypothetical protein FG01671.1 [Gibberella zeae PH-1]	1	561406	hypothetical protein		0	1	0	0	0	0	0
FVEG_09760	NMT1_ASPPA NMT1 protein homolog [Gibberella zeae PH-1]	1	568078	pyrimidine precursor biosynthesis enzyme THI12		-180.77	2	180.77	3	2	0	0
FVEG_09759	hypothetical protein FG01673.1 [Gibberella zeae PH-1]	1	570271	hypothetical protein		-28.857	5	180.77	3	2	0	0
FVEG_09758	predicted protein [Nectria haematococca mpVI 77-13-4]_x0001_gb|EEU44086.1| predicted protein [Nectria haematococca mpVI 77-13-4]	1	573288	hypothetical protein		-27.4374	6	180.77	3	2	0	0
FVEG_09757	-	1	575777	hypothetical protein		0	1	0	0	0	0	0
FVEG_09756	hypothetical protein FG01662.1 [Gibberella zeae PH-1]	1	579126	hypothetical protein		71.4797	2	71.4797	10	2	0	0
FVEG_09755	hypothetical protein FG01661.1 [Gibberella zeae PH-1]	1	582463	hypothetical protein		10.2908	1	71.4797	10	2	0	0
FVEG_09754	hypothetical protein FG01658.1 [Gibberella zeae PH-1]	1	583983	hypothetical protein		0	1	71.4797	10	2	0	0
FVEG_09753	hypothetical protein FG01657.1 [Gibberella zeae PH-1]	1	586781	hypothetical protein		26.821	2	71.4797	10	2	0	0
FVEG_09752	hypothetical protein FG01656.1 [Gibberella zeae PH-1]	1	588155	ATP-dependent RNA helicase DOB1		0	1	71.4797	10	2	0	0
FVEG_09751	cytochrome-c oxidase chain VIIc-like protein [Metarhizium anisopliae ARSEF 23]	1	592207	hypothetical protein		22.9355	2	71.4797	10	2	0	0
FVEG_09750	hypothetical protein FG01654.1 [Gibberella zeae PH-1]	1	592893	hypothetical protein		19.8267	2	71.4797	10	2	0	0
FVEG_09749	hypothetical protein NECHADRAFT_102941 [Nectria haematococca mpVI 77-13-4]_x0001_gb|EEU44081.1| hypothetical protein NECHADRAFT_102941 [Nectria haematococca mpVI 77-13-4]	1	595279	hypothetical protein		33.1111	5	71.4797	10	2	0	0
FVEG_09748	hypothetical protein FG01652.1 [Gibberella zeae PH-1]	1	596289	hypothetical protein		39.0247	5	71.4797	10	2	0	0
FVEG_09747	hypothetical protein FG01649.1 [Gibberella zeae PH-1]	1	598018	hypothetical protein		51.0446	5	71.4797	10	2	0	0
FVEG_09746	hypothetical protein FG01648.1 [Gibberella zeae PH-1]	1	599548	hypothetical protein		17.2386	3	0	0	0	0	0
FVEG_09745	hypothetical protein FG01647.1 [Gibberella zeae PH-1]	1	601683	hypothetical protein		70.067	5	0	0	0	0	0
FVEG_09744	hypothetical protein FG01646.1 [Gibberella zeae PH-1]	1	612017	hypothetical protein		65.1377	5	0	0	0	0	0
FVEG_09743	hypothetical protein FG01645.1 [Gibberella zeae PH-1]	1	616189	hypothetical protein		-14.4229	4	0	0	0	0	0
FVEG_09742	hypothetical protein FG01644.1 [Gibberella zeae PH-1]	1	623518	hypothetical protein		0	1	0	0	0	0	0
FVEG_09741	hypothetical protein FG01643.1 [Gibberella zeae PH-1]	1	627310	chorismate synthase		41.6817	5	0	0	0	0	0
FVEG_09740	hypothetical protein FG01642.1 [Gibberella zeae PH-1]	1	630035	hypothetical protein		0	1	0	0	0	0	0
FVEG_09739	hypothetical protein NECHADRAFT_30239 [Nectria haematococca mpVI 77-13-4]_x0001_gb|EEU43864.1| hypothetical protein NECHADRAFT_30239 [Nectria haematococca mpVI 77-13-4]	1	641400	hypothetical protein		61.5613	5	0	0	0	0	0
FVEG_09738	hypothetical protein FG01640.1 [Gibberella zeae PH-1]	1	645981	alpha-1,3-mannosyltransferase alg-2		0	1	0	0	0	0	0
FVEG_09737	hypothetical protein FG01639.1 [Gibberella zeae PH-1]	1	648535	hypothetical protein		55.5972	5	0	0	0	0	0
FVEG_09736	hypothetical protein FG01638.1 [Gibberella zeae PH-1]	1	650101	hypothetical protein		-1.17117	2	0	0	0	0	0
FVEG_09735	hypothetical protein FG01637.1 [Gibberella zeae PH-1]	1	655002	hypothetical protein		53.8494	5	0	0	0	0	0
FVEG_09734	-	1	658799	hypothetical protein		62.8305	5	0	0	0	0	0
FVEG_09733	hypothetical protein FG01636.1 [Gibberella zeae PH-1]	1	661729	hypothetical protein		74.5019	5	74.5019	17	5	0	0
FVEG_09732	hypothetical protein NECHADRAFT_89645 [Nectria haematococca mpVI 77-13-4]_x0001_gb|EEU44073.1| hypothetical protein NECHADRAFT_89645 [Nectria haematococca mpVI 77-13-4]	1	664237	hypothetical protein		0	1	74.5019	17	5	0	0
FVEG_09731	hypothetical protein NECHADRAFT_74101 [Nectria haematococca mpVI 77-13-4]_x0001_gb|EEU44072.1| hypothetical protein NECHADRAFT_74101 [Nectria haematococca mpVI 77-13-4]	1	667808	hypothetical protein		0	1	74.5019	17	5	0	0
FVEG_09730	hypothetical protein FG01633.1 [Gibberella zeae PH-1]	1	672045	hypothetical protein		72.2992	5	74.5019	17	5	0	0
FVEG_09729	hypothetical protein FG01632.1 [Gibberella zeae PH-1]	1	674915	hypothetical protein		0	1	74.5019	17	5	0	0
FVEG_09728	hypothetical protein FG01631.1 [Gibberella zeae PH-1]	1	682242	hypothetical protein		28.8182	5	74.5019	17	5	0	0
FVEG_09727	hypothetical protein FG01630.1 [Gibberella zeae PH-1]	1	683528	hypothetical protein		1.01453	1	74.5019	17	5	0	0
FVEG_09726	hypothetical protein FG01629.1 [Gibberella zeae PH-1]	1	685450	hypothetical protein		0	1	74.5019	17	5	0	0
FVEG_09724	histone 2A variant [Nectria haematococca mpVI 77-13-4]_x0001_gb|EEU44068.1| histone 2A variant [Nectria haematococca mpVI 77-13-4]	1	696683	hypothetical protein		8.11788	5	74.5019	17	5	0	0
FVEG_09723	hypothetical protein FG01626.1 [Gibberella zeae PH-1]	1	699036	hypothetical protein		0	1	74.5019	17	5	0	0
FVEG_09722	hypothetical protein FG01624.1 [Gibberella zeae PH-1]	1	704883	ER lumen protein retaining receptor		0	1	74.5019	17	5	0	0
FVEG_09721	hypothetical protein FG01623.1 [Gibberella zeae PH-1]	1	706490	hypothetical protein		6.90702	6	74.5019	17	5	0	0
FVEG_09720	hypothetical protein FG01622.1 [Gibberella zeae PH-1]	1	707341	mitochondrial ribosomal protein S19		30.8718	5	74.5019	17	5	0	0
FVEG_09719	hypothetical protein FG01621.1 [Gibberella zeae PH-1]	1	708624	endoglucanase 3 precursor		1.55717	1	74.5019	17	5	0	0
FVEG_09718	predicted protein [Nectria haematococca mpVI 77-13-4]_x0001_gb|EEU44060.1| predicted protein [Nectria haematococca mpVI 77-13-4]	1	710360	hypothetical protein		5.55465	5	74.5019	17	5	0	0
FVEG_09717	hypothetical protein FG01619.1 [Gibberella zeae PH-1]	1	713253	hypothetical protein		2.06589	3	74.5019	17	5	0	0
FVEG_09716	hypothetical protein NECHADRAFT_89636 [Nectria haematococca mpVI 77-13-4]_x0001_gb|EEU43854.1| hypothetical protein NECHADRAFT_89636 [Nectria haematococca mpVI 77-13-4]	1	716671	hypothetical protein		2.40828	3	74.5019	17	5	0	0
FVEG_09715	hypothetical protein NECHADRAFT_89637 [Nectria haematococca mpVI 77-13-4]_x0001_gb|EEU43855.1| hypothetical protein NECHADRAFT_89637 [Nectria haematococca mpVI 77-13-4]	1	719182	hypothetical protein		-0.336096	5	0	0	0	0	0
FVEG_09714	predicted protein [Nectria haematococca mpVI 77-13-4]_x0001_gb|EEU43442.1| predicted protein [Nectria haematococca mpVI 77-13-4]	1	727684	hypothetical protein		-7.70954	4	0	0	0	0	0
FVEG_09713	hypothetical protein FG01615.1 [Gibberella zeae PH-1]	1	731623	hypothetical protein		-10.8578	4	10.8578	3	4	0	0
FVEG_09712	hypothetical protein FG01614.1 [Gibberella zeae PH-1]	1	733535	hypothetical protein		1.19521	2	10.8578	3	4	0	0
FVEG_09711	hypothetical protein FG01613.1 [Gibberella zeae PH-1]	1	736625	hypothetical protein		2.51287	3	10.8578	3	4	0	0
FVEG_09710	hypothetical protein FG01612.1 [Gibberella zeae PH-1]	1	738497	hypothetical protein		0	1	0	0	0	0	0
FVEG_09709	-	1	742813	hypothetical protein		3.79827	2	0	0	0	0	0
FVEG_09708	hypothetical protein FG01611.1 [Gibberella zeae PH-1]	1	751193	hypothetical protein		-15.9869	6	0	0	0	0	0
FVEG_09707	hypothetical protein FG01610.1 [Gibberella zeae PH-1]	1	753442	hypothetical protein		30.5533	4	0	0	0	0	0
FVEG_09706	-	1	755720	hypothetical protein		49.5565	4	0	0	0	0	0
FVEG_09705	hypothetical protein FG01608.1 [Gibberella zeae PH-1]	1	761139	hypothetical protein		147.245	4	147.245	3	4	0	0
FVEG_09704	-	1	764232	hypothetical protein		0	1	147.245	3	4	0	0
FVEG_09703	-	1	766408	hypothetical protein		0	1	147.245	3	4	0	0
FVEG_09702	hypothetical protein FG01607.1 [Gibberella zeae PH-1]	1	769302	pectin lyase B precursor		3.33519	6	0	0	0	0	0
FVEG_09701	hypothetical protein FG01606.1 [Gibberella zeae PH-1]	1	770597	hypothetical protein		5.46962	6	0	0	0	0	0
FVEG_09700	hypothetical protein FG01605.1 [Gibberella zeae PH-1]	1	775991	26S protease regulatory subunit 8		0	1	0	0	0	0	0
FVEG_09699	-	1	778589	hypothetical protein		-2.355	2	0	0	0	0	0
FVEG_09698	hypothetical protein NECHADRAFT_89680 [Nectria haematococca mpVI 77-13-4]_x0001_gb|EEU43888.1| hypothetical protein NECHADRAFT_89680 [Nectria haematococca mpVI 77-13-4]	1	785880	hypothetical protein		16.1671	6	0	0	0	0	0
FVEG_09697	hypothetical protein NECHADRAFT_29788 [Nectria haematococca mpVI 77-13-4]_x0001_gb|EEU43889.1| hypothetical protein NECHADRAFT_29788 [Nectria haematococca mpVI 77-13-4]	1	790987	hypothetical protein		23.8547	6	23.8547	3	6	0	0
FVEG_09696	hypothetical protein FG01604.1 [Gibberella zeae PH-1]	1	795323	hypothetical protein		16.0223	3	23.8547	3	6	0	0
FVEG_09695	hypothetical protein FG01604.1 [Gibberella zeae PH-1]	1	796431	hypothetical protein		12.6997	1	23.8547	3	6	0	0
FVEG_09694	hypothetical protein FG01603.1 [Gibberella zeae PH-1]	1	799583	hypothetical protein		-3.03443	6	0	0	0	0	0
FVEG_09693	hypothetical protein NECHADRAFT_74155 [Nectria haematococca mpVI 77-13-4]_x0001_gb|EEU44099.1| hypothetical protein NECHADRAFT_74155 [Nectria haematococca mpVI 77-13-4]	1	803310	hypothetical protein		0	1	0	0	0	0	0
FVEG_09692	predicted protein [Nectria haematococca mpVI 77-13-4]_x0001_gb|EEU43890.1| predicted protein [Nectria haematococca mpVI 77-13-4]	1	805737	ARP2/3 complex 21 kDa subunit		-7.98136	6	0	0	0	0	0
FVEG_09691	-	1	811721	hypothetical protein		-16.4918	2	0	0	0	0	0
FVEG_09690	-	1	812959	hypothetical protein		0	1	0	0	0	0	0
FVEG_09689	-	1	817537	hypothetical protein		-21.0529	2	0	0	0	0	0
FVEG_09688	hypothetical protein NECHADRAFT_89689 [Nectria haematococca mpVI 77-13-4]_x0001_gb|EEU43896.1| hypothetical protein NECHADRAFT_89689 [Nectria haematococca mpVI 77-13-4]	1	821247	hypothetical protein		23.6633	4	0	0	0	0	0
FVEG_09687	hypothetical protein FG01600.1 [Gibberella zeae PH-1]	1	823590	hypothetical protein		-58.9035	6	58.9035	3	6	0	0
FVEG_09686	hypothetical protein FG01599.1 [Gibberella zeae PH-1]	1	827744	hypothetical protein		0	1	58.9035	3	6	0	0
FVEG_09685	hypothetical protein NECHADRAFT_89688 [Nectria haematococca mpVI 77-13-4]_x0001_gb|EEU43894.1| hypothetical protein NECHADRAFT_89688 [Nectria haematococca mpVI 77-13-4]	1	831828	hypothetical protein		0	1	58.9035	3	6	0	0
FVEG_09684	hypothetical protein FG01593.1 [Gibberella zeae PH-1]	1	836156	hypothetical protein		-62.3613	2	0	0	0	0	0
FVEG_09683	-	1	838967	hypothetical protein		-71.7349	2	0	0	0	0	0
FVEG_09682	-	1	840420	hypothetical protein		-85.8484	2	0	0	0	0	0
FVEG_09681	predicted protein [Nectria haematococca mpVI 77-13-4]_x0001_gb|EEU43892.1| predicted protein [Nectria haematococca mpVI 77-13-4]	1	840888	hypothetical protein		0	1	0	0	0	0	0
FVEG_09680	hypothetical protein NECHADRAFT_102957 [Nectria haematococca mpVI 77-13-4]_x0001_gb|EEU44101.1| hypothetical protein NECHADRAFT_102957 [Nectria haematococca mpVI 77-13-4]	1	844251	mitochondrial phosphate carrier protein		-168.22	2	0	0	0	0	0
FVEG_09679	hypothetical protein FG01589.1 [Gibberella zeae PH-1]	1	847512	hypothetical protein		-2.52926	4	0	0	0	0	0
FVEG_09678	hypothetical protein FG01588.1 [Gibberella zeae PH-1]	1	860700	hypothetical protein		-278.661	2	0	0	0	0	0
FVEG_09677	hypothetical protein FG01587.1 [Gibberella zeae PH-1]	1	865037	hypothetical protein		-443.397	2	443.397	6	2	0	0
FVEG_09676	hypothetical protein FG01586.1 [Gibberella zeae PH-1]	1	868135	hypothetical protein		-438.943	2	443.397	6	2	0	0
FVEG_09675	hypothetical protein FG01585.1 [Gibberella zeae PH-1]	1	870266	hypothetical protein		-426.568	2	443.397	6	2	0	0
FVEG_09674	predicted protein [Nectria haematococca mpVI 77-13-4]_x0001_gb|EEU44107.1| predicted protein [Nectria haematococca mpVI 77-13-4]	1	871910	hypothetical protein		3.7547	6	443.397	6	2	0	0
FVEG_09673	-	1	877398	hypothetical protein		4.93907	6	443.397	6	2	0	0
FVEG_09672	-	1	883816	hypothetical protein		0	1	443.397	6	2	0	0
FVEG_09671	-	1	890964	hypothetical protein		-12.0603	1	12.0603	3	1	0	0
FVEG_09670	-	1	896632	hypothetical protein		7.77882	5	12.0603	3	1	0	0
FVEG_09669	hypothetical protein FG01584.1 [Gibberella zeae PH-1]	1	899354	hypothetical protein		0	1	12.0603	3	1	0	0
FVEG_09668	hypothetical protein FG01581.1 [Gibberella zeae PH-1]	1	901408	hypothetical protein		19.5033	6	0	0	0	0	0
FVEG_09667	hypothetical protein FG01582.1 [Gibberella zeae PH-1]	1	903942	hypothetical protein		0	1	0	0	0	0	0
FVEG_09666	hypothetical protein NECHADRAFT_102961 [Nectria haematococca mpVI 77-13-4]_x0001_gb|EEU43909.1| hypothetical protein NECHADRAFT_102961 [Nectria haematococca mpVI 77-13-4]	1	908244	hypothetical protein		12.781	6	0	0	0	0	0
FVEG_09665	hypothetical protein FG01574.1 [Gibberella zeae PH-1]	1	908978	hypothetical protein		18.2722	6	0	0	0	0	0
FVEG_09664	hypothetical protein NECHADRAFT_102960 [Nectria haematococca mpVI 77-13-4]_x0001_gb|EEU43908.1| hypothetical protein NECHADRAFT_102960 [Nectria haematococca mpVI 77-13-4]	1	910475	hypothetical protein		21.1186	3	0	0	0	0	0
FVEG_09663	peroxin 22-like protein [Metarhizium anisopliae ARSEF 23]	1	914028	hypothetical protein		23.4781	3	0	0	0	0	0
FVEG_09662	hypothetical protein FG01575.1 [Gibberella zeae PH-1]	1	916022	hypothetical protein		29.3672	3	29.3672	3	3	0	0
FVEG_09661	hypothetical protein FG01576.1 [Gibberella zeae PH-1]	1	926906	hypothetical protein		-25.7575	4	29.3672	3	3	0	0
FVEG_09660	hypothetical protein NECHADRAFT_30392 [Nectria haematococca mpVI 77-13-4]_x0001_gb|EEU44112.1| hypothetical protein NECHADRAFT_30392 [Nectria haematococca mpVI 77-13-4]	1	932802	hypothetical protein		0	1	29.3672	3	3	0	0
FVEG_09659	hypothetical protein FG01579.1 [Gibberella zeae PH-1]	1	942675	hypothetical protein		-5.45157	3	5.45157	3	3	0	0
FVEG_09658	TPA_inf: GPR1/FUN34/YaaH-class plasma membrane protein [Gibberella moniliformis]	1	945641	hypothetical protein		-3.15258	2	5.45157	3	3	0	0
FVEG_09657	hypothetical protein FG01583.1 [Gibberella zeae PH-1]	1	947568	hypothetical protein		-3.17027	2	5.45157	3	3	0	0
FVEG_09656	hypothetical protein FG01573.1 [Gibberella zeae PH-1]	1	951664	acetylornithine aminotransferase, mitochondrial precursor		0	1	0	0	0	0	0
FVEG_09655	predicted protein [Nectria haematococca mpVI 77-13-4]_x0001_gb|EEU44115.1| predicted protein [Nectria haematococca mpVI 77-13-4]	1	953304	glutamate decarboxylase 1		-23.0388	2	23.0388	4	2	0	0
FVEG_09654	hypothetical protein NECHADRAFT_65162 [Nectria haematococca mpVI 77-13-4]_x0001_gb|EEU44116.1| hypothetical protein NECHADRAFT_65162 [Nectria haematococca mpVI 77-13-4]	1	958503	hypothetical protein		-12.728	4	23.0388	4	2	0	0
FVEG_09653	hypothetical protein FG01570.1 [Gibberella zeae PH-1]	1	963619	hypothetical protein		1.27913	1	23.0388	4	2	0	0
FVEG_09652	hypothetical protein FG01569.1 [Gibberella zeae PH-1]	1	965849	hypothetical protein		-8.41386	4	23.0388	4	2	0	0
FVEG_09651	hypothetical protein FG01568.1 [Gibberella zeae PH-1]	1	971013	hypothetical protein		6.00809	6	0	0	0	0	0
FVEG_09650	hypothetical protein FG01568.1 [Gibberella zeae PH-1]	1	973814	hypothetical protein		0	1	0	0	0	0	0
FVEG_09649	hypothetical protein FG01567.1 [Gibberella zeae PH-1]_x0001_sp|Q4IMJ1.1|ADE_GIBZE RecName: Full=Adenine deaminase; Short=ADE; AltName: Full=Adenine aminohydrolase; Short=AAH	1	977678	hypothetical protein		4.59794	5	0	0	0	0	0
FVEG_09648	hypothetical protein FG01564.1 [Gibberella zeae PH-1]	1	987996	hypothetical protein		0	1	0	0	0	0	0
FVEG_09647	hypothetical protein NECHADRAFT_30505 [Nectria haematococca mpVI 77-13-4]_x0001_gb|EEU44120.1| hypothetical protein NECHADRAFT_30505 [Nectria haematococca mpVI 77-13-4]	1	989637	hypothetical protein		11.093	5	0	0	0	0	0
FVEG_09646	hypothetical protein FG01563.1 [Gibberella zeae PH-1]	1	990296	hypothetical protein		12.7629	5	0	0	0	0	0
FVEG_09644	hypothetical protein FG01562.1 [Gibberella zeae PH-1]	1	993125	hypothetical protein		9.16179	6	0	0	0	0	0
FVEG_09643	-	1	995600	hypothetical protein		20.3027	5	0	0	0	0	0
FVEG_09642	hypothetical protein FG01561.1 [Gibberella zeae PH-1]	1	997995	xanthine dehydrogenase		6.35668	3	0	0	0	0	0
FVEG_09641	hypothetical protein FG01560.1 [Gibberella zeae PH-1]	1	1003000	hypothetical protein		13.8451	5	0	0	0	0	0
FVEG_09640	hypothetical protein FG01559.1 [Gibberella zeae PH-1]	1	1005574	hypothetical protein		10.3004	6	0	0	0	0	0
FVEG_09639	hypothetical protein FG01558.1 [Gibberella zeae PH-1]	1	1007574	hypothetical protein		4.77651	3	0	0	0	0	0
FVEG_09638	hypothetical protein FG01557.1 [Gibberella zeae PH-1]	1	1015839	hypothetical protein		14.0165	5	0	0	0	0	0
FVEG_09637	hypothetical protein FG01556.1 [Gibberella zeae PH-1]	1	1019191	hypothetical protein		13.4946	5	0	0	0	0	0
FVEG_09636	hypothetical protein FG01555.1 [Gibberella zeae PH-1]	1	1020379	hypothetical protein		12.3867	3	0	0	0	0	0
FVEG_09635	-	1	1023904	hypothetical protein		13.6354	5	0	0	0	0	0
FVEG_09634	hypothetical protein FG01554.1 [Gibberella zeae PH-1]	1	1026119	hypothetical protein		31.1434	3	0	0	0	0	0
FVEG_09633	hypothetical protein FG01553.1 [Gibberella zeae PH-1]	1	1029237	hypothetical protein		0	1	0	0	0	0	0
FVEG_09632	hypothetical protein FG01552.1 [Gibberella zeae PH-1]	1	1033381	hypothetical protein		33.9205	5	0	0	0	0	0
FVEG_09631	hypothetical protein FG01551.1 [Gibberella zeae PH-1]	1	1034496	hypothetical protein		41.8383	3	41.8383	3	3	0	0
FVEG_09630	hypothetical protein FG01550.1 [Gibberella zeae PH-1]	1	1036929	hypothetical protein		22.7445	3	41.8383	3	3	0	0
FVEG_09629	hypothetical protein FG01549.1 [Gibberella zeae PH-1]	1	1039425	hypothetical protein		-8.04757	4	41.8383	3	3	0	0
FVEG_09628	hypothetical protein FG01548.1 [Gibberella zeae PH-1]	1	1042578	hypothetical protein		12.2015	6	12.2015	5	6	0	0
FVEG_09627	hypothetical protein MAC_09561 [Metarhizium acridum CQMa 102]	1	1047521	hypothetical protein		11.4125	6	12.2015	5	6	0	0
FVEG_09626	hypothetical protein CHGG_07924 [Chaetomium globosum CBS 148.51]_x0001_gb|EAQ86671.1| hypothetical protein CHGG_07924 [Chaetomium globosum CBS 148.51]	1	1052795	hypothetical protein		0	1	12.2015	5	6	0	0
FVEG_09625	hypothetical protein NECHADRAFT_30457 [Nectria haematococca mpVI 77-13-4]_x0001_gb|EEU43919.1| hypothetical protein NECHADRAFT_30457 [Nectria haematococca mpVI 77-13-4]	1	1055379	hypothetical protein		2.56227	3	12.2015	5	6	0	0
FVEG_09624	hypothetical protein FG01544.1 [Gibberella zeae PH-1]	1	1058524	ankyrin repeat protein nuc-2		3.09575	2	12.2015	5	6	0	0
FVEG_09623	hypothetical protein FG01543.1 [Gibberella zeae PH-1]	1	1063541	hypothetical protein		1.77334	1	0	0	0	0	0
FVEG_09622	hypothetical protein FG01542.1 [Gibberella zeae PH-1]	1	1064773	hypothetical protein		8.49089	2	0	0	0	0	0
FVEG_09621	hypothetical protein FG01541.1 [Gibberella zeae PH-1]	1	1065685	hypothetical protein		8.51834	5	0	0	0	0	0
FVEG_09620	hypothetical protein FG01540.1 [Gibberella zeae PH-1]	1	1067034	hypothetical protein		9.2824	3	0	0	0	0	0
FVEG_09619	hypothetical protein FG01539.1 [Gibberella zeae PH-1]	1	1068109	hypothetical protein		43.6277	5	43.6277	3	5	0	0
FVEG_09618	RecName: Full=Probable kinetochore protein SPC25	1	1071724	hypothetical protein		6.0282	6	43.6277	3	5	0	0
FVEG_09617	hypothetical protein FG01536.1 [Gibberella zeae PH-1]	1	1073712	hypothetical protein		-3.85643	4	43.6277	3	5	0	0
FVEG_09616	hypothetical protein FG01535.1 [Gibberella zeae PH-1]	1	1077709	dolichyl-phosphate-mannose-protein mannosyltransferase 2		0	1	0	0	0	0	0
FVEG_09615	hypothetical protein FG01534.1 [Gibberella zeae PH-1]	1	1080953	hypothetical protein		1.39499	2	0	0	0	0	0
FVEG_09614	hypothetical protein FG01533.1 [Gibberella zeae PH-1]	1	1083345	hypothetical protein		1.70836	1	0	0	0	0	0
FVEG_09613	hypothetical protein NECHADRAFT_74229 [Nectria haematococca mpVI 77-13-4]_x0001_gb|EEU43925.1| hypothetical protein NECHADRAFT_74229 [Nectria haematococca mpVI 77-13-4]	1	1086356	hypothetical protein		-4.39789	6	0	0	0	0	0
FVEG_09612	hypothetical protein FG01532.1 [Gibberella zeae PH-1]	1	1088062	hypothetical protein		0	1	0	0	0	0	0
FVEG_09611	hypothetical protein FG01531.1 [Gibberella zeae PH-1]	1	1090318	hypothetical protein		0	1	0	0	0	0	0
FVEG_09610	hypothetical protein FG01530.1 [Gibberella zeae PH-1]	1	1095562	hypothetical protein		3.95698	3	0	0	0	0	0
FVEG_09609	hypothetical protein FG01530.1 [Gibberella zeae PH-1]	1	1097021	hypothetical protein		0	1	0	0	0	0	0
FVEG_09608	-	1	1100029	hypothetical protein		-5.73507	5	0	0	0	0	0
FVEG_09607	hypothetical protein FG01528.1 [Gibberella zeae PH-1]	1	1101837	hypothetical protein		8.3932	2	0	0	0	0	0
FVEG_09606	hypothetical protein FG01527.1 [Gibberella zeae PH-1]	1	1103609	hypothetical protein		-8.35524	5	0	0	0	0	0
FVEG_09605	hypothetical protein FG01526.1 [Gibberella zeae PH-1]	1	1110041	hypothetical protein		10.4849	3	0	0	0	0	0
FVEG_09604	hypothetical protein FG01525.1 [Gibberella zeae PH-1]	1	1113345	hypothetical protein		-30.8152	5	0	0	0	0	0
FVEG_09603	hypothetical protein FG01524.1 [Gibberella zeae PH-1]	1	1114779	hypothetical protein		0	1	0	0	0	0	0
FVEG_09602	hypothetical protein FG01523.1 [Gibberella zeae PH-1]	1	1119865	NAD(P)H-dependent D-xylose reductase		-114.89	5	0	0	0	0	0
FVEG_09601	hypothetical protein FG01522.1 [Gibberella zeae PH-1]	1	1121789	protein phosphatase 1 regulatory subunit SDS22		7.9926	1	0	0	0	0	0
FVEG_09600	-	1	1123818	hypothetical protein		12.6549	3	0	0	0	0	0
FVEG_09599	hypothetical protein FG01521.1 [Gibberella zeae PH-1]	1	1124962	hypothetical protein		27.1164	5	0	0	0	0	0
FVEG_09598	hypothetical protein FG01520.1 [Gibberella zeae PH-1]	1	1126696	hypothetical protein		16.6222	3	0	0	0	0	0
FVEG_09597	hypothetical protein FG01519.1 [Gibberella zeae PH-1]_x0001_sp|Q4IMN9.1|CSN12_GIBZE RecName: Full=Protein CSN12 homolog	1	1128742	COP9 signalosome complex subunit 12		20.832	3	0	0	0	0	0
FVEG_09596	predicted protein [Nectria haematococca mpVI 77-13-4]_x0001_gb|EEU44147.1| predicted protein [Nectria haematococca mpVI 77-13-4]	1	1131082	60S ribosomal protein L20		20.8138	3	0	0	0	0	0
FVEG_09595	hypothetical protein FG01515.1 [Gibberella zeae PH-1]	1	1132320	hypothetical protein		22.7245	3	0	0	0	0	0
FVEG_09594	hypothetical protein FG01514.1 [Gibberella zeae PH-1]	1	1135268	hypothetical protein		82.9857	5	0	0	0	0	0
FVEG_09593	hypothetical protein FG01513.1 [Gibberella zeae PH-1]	1	1136227	hypothetical protein		102.886	5	0	0	0	0	0
FVEG_09592	-	1	1137188	hypothetical protein		120.273	5	0	0	0	0	0
FVEG_09591	hypothetical protein FG01511.1 [Gibberella zeae PH-1]	1	1138616	hypothetical protein		122.511	5	122.511	15	5	0	0
FVEG_09590	hypothetical protein FG01510.1 [Gibberella zeae PH-1]	1	1141770	hypothetical protein		0	1	122.511	15	5	0	0
FVEG_09589	hypothetical protein FG01484.1 [Gibberella zeae PH-1]	1	1149813	hypothetical protein		25.2639	6	122.511	15	5	0	0
FVEG_09588	hypothetical protein FG01485.1 [Gibberella zeae PH-1]	1	1152520	hypothetical protein		52.2486	5	122.511	15	5	0	0
FVEG_09587	hypothetical protein FG01486.1 [Gibberella zeae PH-1]	1	1153894	phospho-2-dehydro-3-deoxyheptonate aldolase		0	1	122.511	15	5	0	0
FVEG_09586	hypothetical protein FG01487.1 [Gibberella zeae PH-1]	1	1156177	hypothetical protein		74.2248	5	122.511	15	5	0	0
FVEG_09585	hypothetical protein FG01488.1 [Gibberella zeae PH-1]	1	1156908	hypothetical protein		0	1	122.511	15	5	0	0
FVEG_09584	hypothetical protein NECHADRAFT_89761 [Nectria haematococca mpVI 77-13-4]_x0001_gb|EEU44155.1| hypothetical protein NECHADRAFT_89761 [Nectria haematococca mpVI 77-13-4]	1	1161350	hypothetical protein		36.8793	6	122.511	15	5	0	0
FVEG_09583	hypothetical protein FG01490.1 [Gibberella zeae PH-1]	1	1162728	hypothetical protein		38.8717	3	122.511	15	5	0	0
FVEG_09582	hypothetical protein FG01491.1 [Gibberella zeae PH-1]	1	1163702	hypothetical protein		0	1	122.511	15	5	0	0
FVEG_09581	hypothetical protein FG01493.1 [Gibberella zeae PH-1]	1	1167275	hypothetical protein		25.081	2	122.511	15	5	0	0
FVEG_09580	hypothetical protein FG01494.1 [Gibberella zeae PH-1]	1	1168490	hypothetical protein		38.2548	3	122.511	15	5	0	0
FVEG_09579	hypothetical protein FG01495.1 [Gibberella zeae PH-1]	1	1170814	hypothetical protein		52.6465	5	122.511	15	5	0	0
FVEG_09578	hypothetical protein FG01496.1 [Gibberella zeae PH-1]	1	1172660	hypothetical protein		-3.9151	4	122.511	15	5	0	0
FVEG_09577	hypothetical protein FG01497.1 [Gibberella zeae PH-1]	1	1179464	hypothetical protein		0	1	122.511	15	5	0	0
FVEG_09576	hypothetical protein FG01498.1 [Gibberella zeae PH-1]	1	1186356	hypothetical protein		3.16441	6	0	0	0	0	0
FVEG_09575	hypothetical protein FG01499.1 [Gibberella zeae PH-1]	1	1188717	hypothetical protein		2.95753	6	0	0	0	0	0
FVEG_09574	hypothetical protein NECHADRAFT_30490 [Nectria haematococca mpVI 77-13-4]_x0001_gb|EEU44164.1| hypothetical protein NECHADRAFT_30490 [Nectria haematococca mpVI 77-13-4]	1	1193679	hypothetical protein		9.86016	5	0	0	0	0	0
FVEG_09573	hypothetical protein FG01502.1 [Gibberella zeae PH-1]	1	1199320	hypothetical protein		2.40579	6	0	0	0	0	0
FVEG_09572	hypothetical protein FG01503.1 [Gibberella zeae PH-1]	1	1200850	hypothetical protein		0	1	0	0	0	0	0
FVEG_09571	hypothetical protein [Podospora anserina S mat+]_x0001_emb|CAP60081.1| unnamed protein product [Podospora anserina S mat+]	1	1202990	60S ribosomal protein L31		18.7883	5	0	0	0	0	0
FVEG_09570	predicted protein [Nectria haematococca mpVI 77-13-4]_x0001_gb|EEU44166.1| predicted protein [Nectria haematococca mpVI 77-13-4]	1	1203923	ubiquitin-conjugating enzyme E2-20 kDa		2.4671	6	0	0	0	0	0
FVEG_09569	predicted protein [Nectria haematococca mpVI 77-13-4]_x0001_gb|EEU43942.1| predicted protein [Nectria haematococca mpVI 77-13-4]	1	1205505	hypothetical protein		17.4915	5	0	0	0	0	0
FVEG_09568	-	1	1208518	hypothetical protein		0	1	0	0	0	0	0
FVEG_09567	hypothetical protein FG01507.1 [Gibberella zeae PH-1]	1	1209865	hypothetical protein		2.33445	6	0	0	0	0	0
FVEG_09566	-	1	1213130	hypothetical protein		13.9435	5	0	0	0	0	0
FVEG_09565	hypothetical protein FG01508.1 [Gibberella zeae PH-1]	1	1213818	hypothetical protein		16.182	5	0	0	0	0	0
FVEG_09564	hypothetical protein FG01509.1 [Gibberella zeae PH-1]	1	1215719	40S ribosomal protein S2		0	1	0	0	0	0	0
FVEG_09563	hypothetical protein FG01483.1 [Gibberella zeae PH-1]	1	1217183	hypothetical protein		0.367466	2	0	0	0	0	0
FVEG_09562	hypothetical protein FG01482.1 [Gibberella zeae PH-1]	1	1222367	hypothetical protein		6.33021	6	0	0	0	0	0
FVEG_09561	hypothetical protein FG01481.1 [Gibberella zeae PH-1]	1	1226313	hypothetical protein		21.4397	5	0	0	0	0	0
FVEG_09560	hypothetical protein FG01480.1 [Gibberella zeae PH-1]	1	1228754	hypothetical protein		7.80695	6	0	0	0	0	0
FVEG_09559	hypothetical protein FG01478.1 [Gibberella zeae PH-1]	1	1235868	hypothetical protein		18.7143	5	0	0	0	0	0
FVEG_09558	hypothetical protein FG01477.1 [Gibberella zeae PH-1]	1	1241384	hypothetical protein		5.97119	6	0	0	0	0	0
FVEG_09557	hypothetical protein FG01476.1 [Gibberella zeae PH-1]	1	1242941	hypothetical protein		27.7337	5	0	0	0	0	0
FVEG_09556	hypothetical protein FG01475.1 [Gibberella zeae PH-1]	1	1244887	hypothetical protein		0	1	0	0	0	0	0
FVEG_09555	hypothetical protein NECHADRAFT_74286 [Nectria haematococca mpVI 77-13-4]_x0001_gb|EEU43952.1| hypothetical protein NECHADRAFT_74286 [Nectria haematococca mpVI 77-13-4]	1	1248412	hypothetical protein		20.6834	5	0	0	0	0	0
FVEG_09554	hypothetical protein FG01473.1 [Gibberella zeae PH-1]	1	1264175	hypothetical protein		2.02414	2	0	0	0	0	0
FVEG_09553	hypothetical protein FG01472.1 [Gibberella zeae PH-1]	1	1269248	hypothetical protein		0	1	0	0	0	0	0
FVEG_09552	predicted protein [Trichoderma reesei QM6a]	1	1271778	hypothetical protein		21.1022	5	0	0	0	0	0
FVEG_09551	hypothetical protein FG01471.1 [Gibberella zeae PH-1]	1	1272873	hypothetical protein		2.16017	2	0	0	0	0	0
FVEG_09550	hypothetical protein FG01470.1 [Gibberella zeae PH-1]	1	1273703	zinc-finger protein zpr1		0	1	0	0	0	0	0
FVEG_09549	hypothetical protein NECHADRAFT_74280 [Nectria haematococca mpVI 77-13-4]_x0001_gb|EEU44169.1| hypothetical protein NECHADRAFT_74280 [Nectria haematococca mpVI 77-13-4]	1	1277777	hypothetical protein		31.9199	5	31.9199	4	5	0	0
FVEG_09548	hypothetical protein FG01469.1 [Gibberella zeae PH-1]	1	1279164	hypothetical protein		2.96353	3	31.9199	4	5	0	0
FVEG_09547	hypothetical protein FG01468.1 [Gibberella zeae PH-1]	1	1281969	hypothetical protein		3.38707	3	31.9199	4	5	0	0
FVEG_09546	hypothetical protein NECHADRAFT_57041 [Nectria haematococca mpVI 77-13-4]_x0001_gb|EEU44173.1| hypothetical protein NECHADRAFT_57041 [Nectria haematococca mpVI 77-13-4]	1	1283412	hypothetical protein		31.7052	2	31.9199	4	5	0	0
FVEG_09545	hypothetical protein FG01466.1 [Gibberella zeae PH-1]	1	1285093	hypothetical protein		1.17136	6	0	0	0	0	0
FVEG_09544	hypothetical protein FG01465.1 [Gibberella zeae PH-1]	1	1286119	hypothetical protein		2.53829	5	0	0	0	0	0
FVEG_09543	protein phosphatase 2A [Gibberella moniliformis]	1	1287406	serine/threonine-protein phosphatase PP1-1		2.84734	3	0	0	0	0	0
FVEG_09542	hypothetical protein FG01463.1 [Gibberella zeae PH-1]	1	1289857	hypothetical protein		2.29923	1	0	0	0	0	0
FVEG_09541	hypothetical protein FG01462.1 [Gibberella zeae PH-1]	1	1292404	hypothetical protein		2.47287	3	0	0	0	0	0
FVEG_09540	hypothetical protein FG01461.1 [Gibberella zeae PH-1]	1	1294058	hypothetical protein		2.51456	2	0	0	0	0	0
FVEG_09539	hypothetical protein FG01459.1 [Gibberella zeae PH-1]	1	1300265	hypothetical protein		0	1	0	0	0	0	0
FVEG_09538	hypothetical protein FG01457.1 [Gibberella zeae PH-1]	1	1305221	hypothetical protein		0	1	0	0	0	0	0
FVEG_09537	hypothetical protein FG01455.1 [Gibberella zeae PH-1]	1	1310852	hypothetical protein		3.31941	3	0	0	0	0	0
FVEG_09536	hypothetical protein FG01454.1 [Gibberella zeae PH-1]	1	1314478	hypothetical protein		3.93549	2	0	0	0	0	0
FVEG_09535	hypothetical protein FG01453.1 [Gibberella zeae PH-1]	1	1318788	hypothetical protein		5.10163	2	0	0	0	0	0
FVEG_09534	hypothetical protein FG01452.1 [Gibberella zeae PH-1]	1	1320325	hypothetical protein		0	1	0	0	0	0	0
FVEG_09533	hypothetical protein FG01451.1 [Gibberella zeae PH-1]	1	1323310	hypothetical protein		1.24964	5	0	0	0	0	0
FVEG_09532	hypothetical protein FG01450.1 [Gibberella zeae PH-1]	1	1324957	hypothetical protein		12.6427	1	0	0	0	0	0
FVEG_09531	hypothetical protein FG01449.1 [Gibberella zeae PH-1]	1	1328988	hypothetical protein		24.5696	2	24.5696	4	2	0	0
FVEG_09530	hypothetical protein FG01448.1 [Gibberella zeae PH-1]	1	1331492	hypothetical protein		21.601	1	24.5696	4	2	0	0
FVEG_09529	predicted protein [Nectria haematococca mpVI 77-13-4]_x0001_gb|EEU44187.1| predicted protein [Nectria haematococca mpVI 77-13-4]	1	1332653	DNA-directed RNA polymerase II 33 kDa polypeptide		21.5631	3	24.5696	4	2	0	0
FVEG_09528	predicted protein [Nectria haematococca mpVI 77-13-4]_x0001_gb|EEU43961.1| predicted protein [Nectria haematococca mpVI 77-13-4]	1	1334168	hypothetical protein		9.40842	6	24.5696	4	2	0	0
FVEG_09527	hypothetical protein FG01445.1 [Gibberella zeae PH-1]	1	1336253	hypothetical protein		7.59871	3	7.59871	3	3	0	0
FVEG_09526	hypothetical protein FG01444.1 [Gibberella zeae PH-1]	1	1344117	hypothetical protein		3.73045	5	7.59871	3	3	0	0
FVEG_09525	hypothetical protein TRIREDRAFT_4265 [Trichoderma reesei QM6a]	1	1347208	hypothetical protein		0	1	7.59871	3	3	0	0
FVEG_09524	hypothetical protein FG04817.1 [Gibberella zeae PH-1]	1	1350045	hypothetical protein		3.61744	6	3.61744	3	6	0	0
FVEG_09523	hypothetical protein NECHADRAFT_89812 [Nectria haematococca mpVI 77-13-4]_x0001_gb|EEU43964.1| hypothetical protein NECHADRAFT_89812 [Nectria haematococca mpVI 77-13-4]	1	1356525	hypothetical protein		1.20657	2	3.61744	3	6	0	0
FVEG_09522	hypothetical protein FG01441.1 [Gibberella zeae PH-1]	1	1361951	hypothetical protein		0	1	3.61744	3	6	0	0
FVEG_09521	VeA protein [Gibberella moniliformis]	1	1364193	hypothetical protein		0	1	0	0	0	0	0
FVEG_09520	-	1	1369546	hypothetical protein		-85.7912	5	85.7912	4	5	0	0
FVEG_09519	hypothetical protein FG01440.1 [Gibberella zeae PH-1]	1	1373093	hypothetical protein		0	1	85.7912	4	5	0	0
FVEG_09518	hypothetical protein NECHADRAFT_89814 [Nectria haematococca mpVI 77-13-4]_x0001_gb|EEU44192.1| hypothetical protein NECHADRAFT_89814 [Nectria haematococca mpVI 77-13-4]	1	1375820	hypothetical protein		6.90667	1	85.7912	4	5	0	0
FVEG_09517	-	1	1381861	hypothetical protein		6.7237	3	85.7912	4	5	0	0
FVEG_09516	hypothetical protein FG01437.1 [Gibberella zeae PH-1]	1	1383456	hypothetical protein		11.2652	5	0	0	0	0	0
FVEG_09515	hypothetical protein NECHADRAFT_65288 [Nectria haematococca mpVI 77-13-4]_x0001_gb|EEU43967.1| hypothetical protein NECHADRAFT_65288 [Nectria haematococca mpVI 77-13-4]	1	1386264	hypothetical protein		-2.50103	4	0	0	0	0	0
FVEG_09514	hypothetical protein FG01435.1 [Gibberella zeae PH-1]	1	1387331	hypothetical protein		9.89884	3	0	0	0	0	0
FVEG_09513	hypothetical protein FG01434.1 [Gibberella zeae PH-1]	1	1388548	hypothetical protein		6.66075	6	0	0	0	0	0
FVEG_09512	-	1	1393447	hypothetical protein		12.5903	3	0	0	0	0	0
FVEG_09511	glutamate synthase [Gibberella fujikuroi]	1	1395982	glutamate synthase precursor		2.95617	2	0	0	0	0	0
FVEG_09510	hypothetical protein FG01432.1 [Gibberella zeae PH-1]	1	1403781	hypothetical protein		6.6319	5	0	0	0	0	0
FVEG_09509	hypothetical protein FG01431.1 [Gibberella zeae PH-1]	1	1407689	hypothetical protein		6.85727	5	0	0	0	0	0
FVEG_09508	hypothetical protein FG01430.1 [Gibberella zeae PH-1]	1	1412442	hypothetical protein		6.50555	5	0	0	0	0	0
FVEG_09507	hypothetical protein FG01429.1 [Gibberella zeae PH-1]	1	1415365	hypothetical protein		0	1	0	0	0	0	0
FVEG_09506	hypothetical protein FG01428.1 [Gibberella zeae PH-1]	1	1420249	hypothetical protein		4.73526	3	0	0	0	0	0
FVEG_09505	-	1	1424469	hypothetical protein		5.405	5	0	0	0	0	0
FVEG_09504	-	1	1425640	hypothetical protein		13.7624	3	0	0	0	0	0
FVEG_09503	hypothetical protein FG01426.1 [Gibberella zeae PH-1]	1	1427124	hypothetical protein		7.70618	6	0	0	0	0	0
FVEG_09502	PMA1_NEUCR Plasma membrane ATPase (Proton pump) [Gibberella zeae PH-1]	1	1428277	plasma membrane ATPase		18.2776	3	0	0	0	0	0
FVEG_09501	hypothetical protein FG01424.1 [Gibberella zeae PH-1]	1	1445390	hypothetical protein		22.7099	3	0	0	0	0	0
FVEG_09500	CISY_NEUCR Citrate synthase, mitochondrial precursor [Gibberella zeae PH-1]	1	1451809	citrate synthase, mitochondrial precursor		25.782	3	0	0	0	0	0
FVEG_09499	mitochondrial FOW-1 like protein [Fusarium oxysporum f. cubense]	1	1455486	mitochondrial DNA replication protein YHM2		34.3597	3	34.3597	5	3	0	0
FVEG_09498	hypothetical protein NECHADRAFT_74336 [Nectria haematococca mpVI 77-13-4]_x0001_gb|EEU44198.1| hypothetical protein NECHADRAFT_74336 [Nectria haematococca mpVI 77-13-4]	1	1457363	hypothetical protein		0	1	34.3597	5	3	0	0
FVEG_09497	hypothetical protein FG01419.1 [Gibberella zeae PH-1]	1	1460990	hypothetical protein		3.54924	6	34.3597	5	3	0	0
FVEG_09496	hypothetical protein FG01418.1 [Gibberella zeae PH-1]	1	1466063	hypothetical protein		4.89994	5	34.3597	5	3	0	0
FVEG_09495	CYSD_EMENI O-ACETYLHOMOSERINE (THIOL)-LYASE (O-ACETYLHOMOSERINE SULFHYDRYLASE) (OAH SULFHYDRYLASE) (HOMOCYSTEINE SYNTHASE) [Gibberella zeae PH-1]	1	1468009	O-acetylhomoserine		-2.36125	4	34.3597	5	3	0	0
FVEG_09494	-	1	1469961	hypothetical protein		2.29171	5	0	0	0	0	0
FVEG_09493	hypothetical protein NECHADRAFT_30401 [Nectria haematococca mpVI 77-13-4]_x0001_gb|EEU44200.1| hypothetical protein NECHADRAFT_30401 [Nectria haematococca mpVI 77-13-4]	1	1473013	hypothetical protein		-1.18567	2	0	0	0	0	0
FVEG_09492	hypothetical protein FG01416.1 [Gibberella zeae PH-1]	1	1475166	hypothetical protein		7.13828	6	0	0	0	0	0
FVEG_09491	hypothetical protein FG01415.1 [Gibberella zeae PH-1]	1	1476894	hypothetical protein		10.513	6	0	0	0	0	0
FVEG_09490	hypothetical protein FG01414.1 [Gibberella zeae PH-1]	1	1478101	hypothetical protein		-12.3145	4	12.3145	3	4	0	0
FVEG_09489	hypothetical protein FG01413.1 [Gibberella zeae PH-1]	1	1481938	hypothetical protein		1.7363	1	12.3145	3	4	0	0
FVEG_09488	hypothetical protein FG01412.1 [Gibberella zeae PH-1]	1	1489801	hypothetical protein		1.77332	1	12.3145	3	4	0	0
FVEG_09487	hypothetical protein FG01411.1 [Gibberella zeae PH-1]_x0001_sp|Q4IMZ7.1|PFA4_GIBZE RecName: Full=Palmitoyltransferase PFA4; AltName: Full=Protein fatty acyltransferase 4	1	1493858	palmitoyltransferase PFA4		2.35156	6	2.35156	6	6	0	0
FVEG_09486	hypothetical protein FG01410.1 [Gibberella zeae PH-1]	1	1495559	myosin-1		0	1	2.35156	6	6	0	0
FVEG_09485	hypothetical protein FG01409.1 [Gibberella zeae PH-1]	1	1500229	hypothetical protein		-2.13471	2	2.35156	6	6	0	0
FVEG_09484	hypothetical protein FG01408.1 [Gibberella zeae PH-1]	1	1505126	hypothetical protein		-1.93453	4	2.35156	6	6	0	0
FVEG_09483	hypothetical protein FG01407.1 [Gibberella zeae PH-1]	1	1508862	hypothetical protein		-2.25984	4	2.35156	6	6	0	0
FVEG_09482	hypothetical protein FG01406.1 [Gibberella zeae PH-1]	1	1511365	hypothetical protein		0	1	2.35156	6	6	0	0
FVEG_09481	hypothetical protein FG01405.1 [Gibberella zeae PH-1]	1	1513861	hypothetical protein		-3.90449	5	0	0	0	0	0
FVEG_09480	hypothetical protein FG01404.1 [Gibberella zeae PH-1]	1	1518007	hypothetical protein		-2.52222	4	0	0	0	0	0
FVEG_09479	hypothetical protein FG01403.1 [Gibberella zeae PH-1]	1	1520299	minor allergen Alt a 7		3.78585	2	0	0	0	0	0
FVEG_09478	hypothetical protein FG01402.1 [Gibberella zeae PH-1]	1	1521730	hypothetical protein		3.69055	3	0	0	0	0	0
FVEG_09477	hypothetical protein FG01401.1 [Gibberella zeae PH-1]	1	1525117	hypothetical protein		5.61305	1	0	0	0	0	0
FVEG_09476	-	1	1527828	hypothetical protein		14.0567	2	0	0	0	0	0
FVEG_09475	-	1	1530190	hypothetical protein		7.53022	1	0	0	0	0	0
FVEG_09474	hypothetical protein NECHADRAFT_74360 [Nectria haematococca mpVI 77-13-4]_x0001_gb|EEU44210.1| hypothetical protein NECHADRAFT_74360 [Nectria haematococca mpVI 77-13-4]	1	1531023	hypothetical protein		0	1	0	0	0	0	0
FVEG_09473	hypothetical protein FG01398.1 [Gibberella zeae PH-1]	1	1533466	hypothetical protein		14.7667	2	0	0	0	0	0
FVEG_09472	hypothetical protein FG01397.1 [Gibberella zeae PH-1]	1	1535401	methionine aminopeptidase 1A		16.5147	2	0	0	0	0	0
FVEG_09471	predicted protein [Nectria haematococca mpVI 77-13-4]_x0001_gb|EEU43989.1| predicted protein [Nectria haematococca mpVI 77-13-4]	1	1538151	hypothetical protein		14.9425	2	0	0	0	0	0
FVEG_09470	predicted protein [Nectria haematococca mpVI 77-13-4]_x0001_gb|EEU43990.1| predicted protein [Nectria haematococca mpVI 77-13-4]	1	1540794	hypothetical protein		13.1162	3	0	0	0	0	0
FVEG_09469	hypothetical protein FG01393.1 [Gibberella zeae PH-1]	1	1541638	hypothetical protein		16.2852	1	0	0	0	0	0
FVEG_09468	hypothetical protein FG01392.1 [Gibberella zeae PH-1]	1	1546074	homoisocitrate dehydrogenase, mitochondrial precursor		20.9162	5	0	0	0	0	0
FVEG_09467	hypothetical protein FG01391.1 [Gibberella zeae PH-1]	1	1547334	elongation factor G 1, mitochondrial precursor		23.5661	5	0	0	0	0	0
FVEG_09466	hypothetical protein FG01390.1 [Gibberella zeae PH-1]	1	1550630	hypothetical protein		20.9302	5	0	0	0	0	0
FVEG_09465	hypothetical protein FG01389.1 [Gibberella zeae PH-1]	1	1553839	hypothetical protein		19.9232	5	0	0	0	0	0
FVEG_09464	predicted protein [Nectria haematococca mpVI 77-13-4]_x0001_gb|EEU43991.1| predicted protein [Nectria haematococca mpVI 77-13-4]	1	1556748	hypothetical protein		22.7219	3	0	0	0	0	0
FVEG_09463	hypothetical protein MAA_00578 [Metarhizium anisopliae ARSEF 23]	1	1560465	hypothetical protein		35.7501	2	35.7501	4	2	0	0
FVEG_09462	predicted protein [Nectria haematococca mpVI 77-13-4]_x0001_gb|EEU43992.1| predicted protein [Nectria haematococca mpVI 77-13-4]	1	1561708	nucleolar GTP-binding protein 2		0	1	35.7501	4	2	0	0
FVEG_09461	hypothetical protein FG01385.1 [Gibberella zeae PH-1]	1	1565129	hypothetical protein		0	1	35.7501	4	2	0	0
FVEG_09460	hypothetical protein FG01383.1 [Gibberella zeae PH-1]	1	1569472	hypothetical protein		0	1	35.7501	4	2	0	0
FVEG_09459	hypothetical protein NECHADRAFT_29814 [Nectria haematococca mpVI 77-13-4]_x0001_gb|EEU44219.1| hypothetical protein NECHADRAFT_29814 [Nectria haematococca mpVI 77-13-4]	1	1570296	hypothetical protein		23.7826	5	0	0	0	0	0
FVEG_09458	hypothetical protein FG01382.1 [Gibberella zeae PH-1]	1	1573047	hypothetical protein		32.19	5	0	0	0	0	0
FVEG_09457	predicted protein [Nectria haematococca mpVI 77-13-4]_x0001_gb|EEU43999.1| predicted protein [Nectria haematococca mpVI 77-13-4]	1	1576511	hypothetical protein		39.1827	5	39.1827	7	5	0	0
FVEG_09456	hypothetical protein FG01379.1 [Gibberella zeae PH-1]	1	1581457	hypothetical protein		0.742872	2	39.1827	7	5	0	0
FVEG_09455	short chain dehydrogenase reductase [Grosmannia clavigera kw1407]	1	1583018	hypothetical protein		21.1497	5	39.1827	7	5	0	0
FVEG_09454	hypothetical protein FG01378.1 [Gibberella zeae PH-1]	1	1584361	hypothetical protein		2.94026	1	39.1827	7	5	0	0
FVEG_09453	-	1	1586353	hypothetical protein		4.22436	3	39.1827	7	5	0	0
FVEG_01517	hypothetical protein FG01377.1 [Gibberella zeae PH-1]	1	1594781	hypothetical protein		0	1	39.1827	7	5	0	0
FVEG_01516	hypothetical protein FG01376.1 [Gibberella zeae PH-1]	1	1596265	hypothetical protein		4.30447	1	39.1827	7	5	0	0
FVEG_01515	hypothetical protein FG01374.1 [Gibberella zeae PH-1]	1	1597966	hypothetical protein		-3.71684	4	0	0	0	0	0
FVEG_01514	hypothetical protein FG01373.1 [Gibberella zeae PH-1]	1	1601129	hypothetical protein		4.33109	1	0	0	0	0	0
FVEG_01513	hypothetical protein NECHADRAFT_89870 [Nectria haematococca mpVI 77-13-4]_x0001_gb|EEU48341.1| hypothetical protein NECHADRAFT_89870 [Nectria haematococca mpVI 77-13-4]	1	1602809	hypothetical protein		4.70661	1	0	0	0	0	0
FVEG_01512	hypothetical protein FG01372.1 [Gibberella zeae PH-1]	1	1604028	hypothetical protein		5.6263	3	0	0	0	0	0
FVEG_01511	hypothetical protein FG01371.1 [Gibberella zeae PH-1]	1	1607289	AMP deaminase		6.94701	2	6.94701	3	2	0	0
FVEG_01510	hypothetical protein NECHADRAFT_89872 [Nectria haematococca mpVI 77-13-4]_x0001_gb|EEU48343.1| hypothetical protein NECHADRAFT_89872 [Nectria haematococca mpVI 77-13-4]	1	1612976	hypothetical protein		5.25353	1	6.94701	3	2	0	0
FVEG_01509	hypothetical protein FG01370.1 [Gibberella zeae PH-1]	1	1614410	hypothetical protein		-4.29047	4	6.94701	3	2	0	0
FVEG_01508	predicted protein [Nectria haematococca mpVI 77-13-4]_x0001_gb|EEU48344.1| predicted protein [Nectria haematococca mpVI 77-13-4]	1	1617196	protein phosphatase PP2A regulatory subunit B		1.32549	2	0	0	0	0	0
FVEG_01507	hypothetical protein FG01368.1 [Gibberella zeae PH-1]	1	1620966	hypothetical protein		4.50106	1	0	0	0	0	0
FVEG_01506	hypothetical protein FG01367.1 [Gibberella zeae PH-1]	1	1624225	hypothetical protein		0	1	0	0	0	0	0
FVEG_01505	hypothetical protein FG01367.1 [Gibberella zeae PH-1]	1	1627637	hypothetical protein		4.43336	1	0	0	0	0	0
FVEG_01504	hypothetical protein FG01366.1 [Gibberella zeae PH-1]	1	1628748	hypothetical protein		4.73257	1	0	0	0	0	0
FVEG_01503	hypothetical protein FG01365.1 [Gibberella zeae PH-1]	1	1630512	hypothetical protein		0	1	0	0	0	0	0
FVEG_01502	hypothetical protein FG01364.1 [Gibberella zeae PH-1]	1	1636788	hypothetical protein		0	1	0	0	0	0	0
FVEG_01501	hypothetical protein FG01363.1 [Gibberella zeae PH-1]	1	1642196	hypothetical protein		-5.12754	4	0	0	0	0	0
FVEG_01500	hypothetical protein NECHADRAFT_65366 [Nectria haematococca mpVI 77-13-4]_x0001_gb|EEU48350.1| hypothetical protein NECHADRAFT_65366 [Nectria haematococca mpVI 77-13-4]	1	1645059	ATP phosphoribosyltransferase		-5.65534	4	0	0	0	0	0
FVEG_01498	Velvet 2 [Gibberella fujikuroi]	1	1648038	hypothetical protein		2.67443	6	0	0	0	0	0
FVEG_01499	-	1	1648311	hypothetical protein		-6.0003	4	0	0	0	0	0
FVEG_01497	hypothetical protein NECHADRAFT_98630 [Nectria haematococca mpVI 77-13-4]_x0001_gb|EEU47639.1| hypothetical protein NECHADRAFT_98630 [Nectria haematococca mpVI 77-13-4]	1	1652007	hypothetical protein		5.46172	1	0	0	0	0	0
FVEG_01496	hypothetical protein FG01361.1 [Gibberella zeae PH-1]	1	1652950	uroporphyrinogen decarboxylase		3.89258	6	0	0	0	0	0
FVEG_01495	hypothetical protein FG01360.1 [Gibberella zeae PH-1]	1	1654897	hypothetical protein		-6.91736	4	0	0	0	0	0
FVEG_01494	hypothetical protein FG01359.1 [Gibberella zeae PH-1]	1	1655496	hypothetical protein		-7.30419	4	0	0	0	0	0
FVEG_01493	hypothetical protein FG01358.1 [Gibberella zeae PH-1]	1	1660216	hypothetical protein		5.9836	1	0	0	0	0	0
FVEG_01492	hypothetical protein FG01357.1 [Gibberella zeae PH-1]	1	1662639	hypothetical protein		0	1	0	0	0	0	0
FVEG_01491	hypothetical protein FG01355.1 [Gibberella zeae PH-1]	1	1666013	hypothetical protein		5.33772	1	0	0	0	0	0
FVEG_01490	hypothetical protein NECHADRAFT_105799 [Nectria haematococca mpVI 77-13-4]_x0001_gb|EEU48354.1| hypothetical protein NECHADRAFT_105799 [Nectria haematococca mpVI 77-13-4]	1	1666873	hypothetical protein		-5.84525	4	0	0	0	0	0
FVEG_01489	hypothetical protein FG01353.1 [Gibberella zeae PH-1]	1	1669785	histone deacetylase phd1		0	1	0	0	0	0	0
FVEG_01488	hypothetical protein NECHADRAFT_74418 [Nectria haematococca mpVI 77-13-4]_x0001_gb|EEU47645.1| hypothetical protein NECHADRAFT_74418 [Nectria haematococca mpVI 77-13-4]	1	1672555	hypothetical protein		4.7821	1	0	0	0	0	0
FVEG_01487	hypothetical protein FG01352.1 [Gibberella zeae PH-1]	1	1674030	hypothetical protein		-7.24943	4	0	0	0	0	0
FVEG_01486	hypothetical protein LOC100191800 [Zea mays]_x0001_gb|ACF79015.1| unknown [Zea mays]	1	1677009	hypothetical protein		-7.48821	4	0	0	0	0	0
FVEG_01485	hypothetical protein FG01350.1 [Gibberella zeae PH-1]	1	1688217	hypothetical protein		1.90973	2	0	0	0	0	0
FVEG_01484	hypothetical protein FG01349.1 [Gibberella zeae PH-1]	1	1691776	hypothetical protein		6.4684	1	0	0	0	0	0
FVEG_01483	hypothetical protein FG01348.1 [Gibberella zeae PH-1]	1	1694774	hypothetical protein		8.6345	1	0	0	0	0	0
FVEG_01482	hypothetical protein FG01347.1 [Gibberella zeae PH-1]	1	1696178	hypothetical protein		-4.9495	4	0	0	0	0	0
FVEG_01481	predicted protein [Nectria haematococca mpVI 77-13-4]_x0001_gb|EEU48358.1| predicted protein [Nectria haematococca mpVI 77-13-4]	1	1700396	enolase		-9.21643	5	0	0	0	0	0
FVEG_01480	hypothetical protein FG01345.1 [Gibberella zeae PH-1]_x0001_sp|Q4IN63.1|PNO1_GIBZE RecName: Full=Pre-rRNA-processing protein PNO1	1	1704326	hypothetical protein		-5.10833	4	0	0	0	0	0
FVEG_01479	hypothetical protein FG01344.1 [Gibberella zeae PH-1]	1	1706461	hypothetical protein		-16.1017	5	16.1017	4	5	0	0
FVEG_01478	hypothetical protein FG01343.1 [Gibberella zeae PH-1]	1	1708520	hypothetical protein		4.78805	6	16.1017	4	5	0	0
FVEG_01477	hypothetical protein FG01342.1 [Gibberella zeae PH-1]	1	1712124	alternative oxidase, mitochondrial precursor		-5.22127	4	16.1017	4	5	0	0
FVEG_01476	hypothetical protein FG01341.1 [Gibberella zeae PH-1]	1	1716116	hypothetical protein		8.82367	3	16.1017	4	5	0	0
FVEG_01475	hypothetical protein FG01340.1 [Gibberella zeae PH-1]	1	1719100	hypothetical protein		0	1	0	0	0	0	0
FVEG_01474	-	1	1726440	hypothetical protein		9.12684	3	0	0	0	0	0
FVEG_01473	-	1	1728328	hypothetical protein		0	1	0	0	0	0	0
FVEG_01472	-	1	1735718	hypothetical protein		7.54224	3	0	0	0	0	0
FVEG_01471	hypothetical protein FG01339.1 [Gibberella zeae PH-1]	1	1737203	hypothetical protein		0	1	0	0	0	0	0
FVEG_01470	hypothetical protein FG01338.1 [Gibberella zeae PH-1]	1	1740116	hypothetical protein		8.39312	3	0	0	0	0	0
FVEG_01469	hypothetical protein FG01337.1 [Gibberella zeae PH-1]	1	1741793	pre-mRNA-splicing factor prp46		10.1005	3	0	0	0	0	0
FVEG_01468	hypothetical protein FG01336.1 [Gibberella zeae PH-1]	1	1743411	hypothetical protein		8.16429	6	0	0	0	0	0
FVEG_01467	hypothetical protein FG01335.1 [Gibberella zeae PH-1]	1	1746757	hypothetical protein		8.75121	3	0	0	0	0	0
FVEG_01466	hypothetical protein FG01334.1 [Gibberella zeae PH-1]	1	1748941	hypothetical protein		10.6308	3	0	0	0	0	0
FVEG_01465	hypothetical protein FG01333.1 [Gibberella zeae PH-1]	1	1749491	hypothetical protein		8.94472	6	0	0	0	0	0
FVEG_01464	hypothetical protein FG01332.1 [Gibberella zeae PH-1]	1	1751972	hypothetical protein		0	1	0	0	0	0	0
FVEG_01463	hypothetical protein FG01331.1 [Gibberella zeae PH-1]	1	1755188	hypothetical protein		10.2772	6	0	0	0	0	0
FVEG_01462	hypothetical protein FG01330.1 [Gibberella zeae PH-1]	1	1756528	hypothetical protein		10.4714	3	0	0	0	0	0
FVEG_01461	hypothetical protein FG01329.1 [Gibberella zeae PH-1]	1	1758249	adenylyl-sulfate kinase		11.9472	6	0	0	0	0	0
FVEG_01460	predicted protein [Trichoderma reesei QM6a]	1	1758584	hypothetical protein		14.286	6	0	0	0	0	0
FVEG_01459	hypothetical protein FG01327.1 [Gibberella zeae PH-1]	1	1761773	hypothetical protein		0	1	0	0	0	0	0
FVEG_01458	Frp1 [Fusarium oxysporum f. sp. lycopersici]	1	1765341	hypothetical protein		9.12629	3	0	0	0	0	0
FVEG_01457	hypothetical protein FG01325.1 [Gibberella zeae PH-1]	1	1772543	hypothetical protein		10.6416	3	0	0	0	0	0
FVEG_01456	hypothetical protein FG01324.1 [Gibberella zeae PH-1]	1	1774610	hypothetical protein		13.498	6	0	0	0	0	0
FVEG_01455	hypothetical protein FG01323.1 [Gibberella zeae PH-1]	1	1775953	hypothetical protein		0	1	0	0	0	0	0
FVEG_01454	hypothetical protein FG01322.1 [Gibberella zeae PH-1]	1	1782452	hypothetical protein		12.2923	6	0	0	0	0	0
FVEG_01453	hypothetical protein FG01321.1 [Gibberella zeae PH-1]	1	1783802	hypothetical protein		0	1	0	0	0	0	0
FVEG_01452	-	1	1787035	hypothetical protein		10.4878	6	0	0	0	0	0
FVEG_01451	predicted protein [Nectria haematococca mpVI 77-13-4]_x0001_gb|EEU47663.1| predicted protein [Nectria haematococca mpVI 77-13-4]	1	1788036	hypothetical protein		13.0816	6	0	0	0	0	0
FVEG_01450	hypothetical protein FG01319.1 [Gibberella zeae PH-1]	1	1791643	hypothetical protein		0	1	0	0	0	0	0
FVEG_01449	hypothetical protein FG01318.1 [Gibberella zeae PH-1]	1	1796351	hypothetical protein		9.36315	6	0	0	0	0	0
FVEG_01447	hypothetical protein FG01317.1 [Gibberella zeae PH-1]	1	1800869	hypothetical protein		-11.4263	4	0	0	0	0	0
FVEG_01446	hypothetical protein FG01316.1 [Gibberella zeae PH-1]	1	1803098	hypothetical protein		0	1	0	0	0	0	0
FVEG_01445	-	1	1806343	hypothetical protein		-10.6678	4	0	0	0	0	0
FVEG_01444	hypothetical protein FG01314.1 [Gibberella zeae PH-1]	1	1808111	hypothetical protein		0	1	0	0	0	0	0
FVEG_01443	hypothetical protein FG01313.1 [Gibberella zeae PH-1]	1	1810617	hypothetical protein		10.1791	6	0	0	0	0	0
FVEG_01442	-	1	1813910	hypothetical protein		-15.4682	4	0	0	0	0	0
FVEG_01441	putative response regulator receiver RIM15p [Gibberella moniliformis]	1	1816621	hypothetical protein		-22.3292	4	22.3292	6	4	0	0
FVEG_01440	hypothetical protein FG01311.1 [Gibberella zeae PH-1]	1	1826069	hypothetical protein		0	1	22.3292	6	4	0	0
FVEG_01439	-	1	1829139	hypothetical protein		-7.19478	4	22.3292	6	4	0	0
FVEG_01438	predicted protein [Hordeum vulgare subsp. vulgare]	1	1837073	hypothetical protein		6.84655	6	22.3292	6	4	0	0
FVEG_01437	hypothetical protein FG01308.1 [Gibberella zeae PH-1]	1	1841205	hypothetical protein		6.32523	6	22.3292	6	4	0	0
FVEG_01436	hypothetical protein FG01307.1 [Gibberella zeae PH-1]	1	1843740	hypothetical protein		3.22394	3	22.3292	6	4	0	0
FVEG_01435	hypothetical protein FG01306.1 [Gibberella zeae PH-1]	1	1850194	hypothetical protein		5.99524	6	0	0	0	0	0
FVEG_01434	hypothetical protein FG01304.1 [Gibberella zeae PH-1]	1	1855202	hypothetical protein		0	1	0	0	0	0	0
FVEG_01433	-	1	1859435	hypothetical protein		-8.83516	5	0	0	0	0	0
FVEG_01432	hypothetical protein FG01302.1 [Gibberella zeae PH-1]	1	1861484	hypothetical protein		0	1	0	0	0	0	0
FVEG_01431	hypothetical protein FG01301.1 [Gibberella zeae PH-1]	1	1865146	hypothetical protein		17.5165	6	0	0	0	0	0
FVEG_01430	hypothetical protein FG01300.1 [Gibberella zeae PH-1]	1	1868907	pre-mRNA-splicing factor clf-1		0	1	0	0	0	0	0
FVEG_01429	hypothetical protein FG01299.1 [Gibberella zeae PH-1]	1	1871313	hypothetical protein		-63.5955	5	63.5955	3	5	0	0
FVEG_01428	hypothetical protein FG01298.1 [Gibberella zeae PH-1]	1	1881167	hypothetical protein		3.62542	3	63.5955	3	5	0	0
FVEG_01427	hypothetical protein FG01297.1 [Gibberella zeae PH-1]	1	1883959	hypothetical protein		0	1	63.5955	3	5	0	0
FVEG_01426	-	1	1887364	hypothetical protein		23.6217	6	0	0	0	0	0
FVEG_01425	hypothetical protein FG01295.1 [Gibberella zeae PH-1]	1	1890822	hypothetical protein		27.4842	6	0	0	0	0	0
FVEG_01424	hypothetical protein NECHADRAFT_74474 [Nectria haematococca mpVI 77-13-4]_x0001_gb|EEU48379.1| hypothetical protein NECHADRAFT_74474 [Nectria haematococca mpVI 77-13-4]	1	1894023	hypothetical protein		-13.5086	4	0	0	0	0	0
FVEG_01423	hypothetical protein FG01293.1 [Gibberella zeae PH-1]	1	1895868	hypothetical protein		14.3439	5	0	0	0	0	0
FVEG_01422	hypothetical protein FG01292.1 [Gibberella zeae PH-1]	1	1900692	hypothetical protein		24.498	6	0	0	0	0	0
FVEG_01421	hypothetical protein FG01291.1 [Gibberella zeae PH-1]	1	1902518	G2/mitotic-specific cyclin-B		0	1	0	0	0	0	0
FVEG_01420	hypothetical protein FG01290.1 [Gibberella zeae PH-1]	1	1906193	60S ribosomal protein RML2, mitochondrial precursor		19.5633	6	0	0	0	0	0
FVEG_01419	hypothetical protein FG01289.1 [Gibberella zeae PH-1]	1	1909798	hypothetical protein		4.27197	3	0	0	0	0	0
FVEG_01418	hypothetical protein FG01288.1 [Gibberella zeae PH-1]	1	1912546	casein kinase II subunit beta-2		20.1458	6	0	0	0	0	0
FVEG_01417	hypothetical protein FG01287.1 [Gibberella zeae PH-1]	1	1914916	hypothetical protein		0	1	0	0	0	0	0
FVEG_01416	hypothetical protein FG01285.1 [Gibberella zeae PH-1]	1	1921761	hypothetical protein		3.32069	3	0	0	0	0	0
FVEG_01415	hypothetical protein FG01284.1 [Gibberella zeae PH-1]	1	1923841	hypothetical protein		13.8444	6	0	0	0	0	0
FVEG_01414	hypothetical protein FG01283.1 [Gibberella zeae PH-1]	1	1927084	hypothetical protein		18.9205	6	0	0	0	0	0
FVEG_01413	hypothetical protein NECHADRAFT_74486 [Nectria haematococca mpVI 77-13-4]_x0001_gb|EEU47681.1| hypothetical protein NECHADRAFT_74486 [Nectria haematococca mpVI 77-13-4]	1	1931281	hypothetical protein		17.5235	6	0	0	0	0	0
FVEG_01412	hypothetical protein FG01281.1 [Gibberella zeae PH-1]	1	1933765	hypothetical protein		16.7385	6	0	0	0	0	0
FVEG_01411	hypothetical protein FG01280.1 [Gibberella zeae PH-1]	1	1936072	hypothetical protein		13.5674	6	0	0	0	0	0
FVEG_01410	G6PD_ASPNG Glucose-6-phosphate 1-dehydrogenase (G6PD) [Gibberella zeae PH-1]	1	1939903	glucose-6-phosphate 1-dehydrogenase		0	1	0	0	0	0	0
FVEG_01409	hypothetical protein FG01278.1 [Gibberella zeae PH-1]	1	1944918	hypothetical protein		10.8454	6	0	0	0	0	0
FVEG_01408	hypothetical protein FG01277.1 [Gibberella zeae PH-1]	1	1950992	hypothetical protein		0	1	0	0	0	0	0
FVEG_01407	hypothetical protein FG01276.1 [Gibberella zeae PH-1]	1	1953357	hypothetical protein		18.1988	6	0	0	0	0	0
FVEG_01406	hypothetical protein FG01275.1 [Gibberella zeae PH-1]	1	1954620	hypothetical protein		-15.7218	4	0	0	0	0	0
FVEG_01405	hypothetical protein FG01274.1 [Gibberella zeae PH-1]	1	1959225	hypothetical protein		13.4837	6	0	0	0	0	0
FVEG_01404	hypothetical protein FG01273.1 [Gibberella zeae PH-1]	1	1966935	hypothetical protein		67.0701	5	67.0701	3	5	0	0
FVEG_01403	chitin synthase 4 [Gibberella moniliformis]	1	1975357	chitin synthase 4		-3.70004	4	67.0701	3	5	0	0
FVEG_01402	hypothetical protein FG01271.1 [Gibberella zeae PH-1]	1	1979682	hypothetical protein		0	1	67.0701	3	5	0	0
FVEG_01401	hypothetical protein FG01270.1 [Gibberella zeae PH-1]	1	1983708	hypothetical protein		2.98133	1	0	0	0	0	0
FVEG_01400	hypothetical protein FG01268.1 [Gibberella zeae PH-1]	1	1988533	hypothetical protein		0	1	0	0	0	0	0
FVEG_01399	hypothetical protein FG01267.1 [Gibberella zeae PH-1]	1	1990634	hypothetical protein		4.64373	3	0	0	0	0	0
FVEG_01398	hypothetical protein FG01266.1 [Gibberella zeae PH-1]	1	1992660	hypothetical protein		0	1	0	0	0	0	0
FVEG_01396	-	1	1994392	hypothetical protein		6.73243	1	0	0	0	0	0
FVEG_01397	hypothetical protein FG01266.1 [Gibberella zeae PH-1]	1	1994497	hypothetical protein		9.09541	3	0	0	0	0	0
FVEG_01395	hypothetical protein FG01265.1 [Gibberella zeae PH-1]	1	1998511	sarcoplasmic/endoplasmic reticulum calcium ATPase 1		8.83496	1	0	0	0	0	0
FVEG_01394	hypothetical protein FG01264.1 [Gibberella zeae PH-1]	1	2001883	hypothetical protein		10.4726	3	0	0	0	0	0
FVEG_01393	hypothetical protein FG01263.1 [Gibberella zeae PH-1]	1	2004150	hypothetical protein		0	1	0	0	0	0	0
FVEG_01392	ribosomal protein S28e [Glomerella graminicola M1.001]	1	2006091	hypothetical protein		10.1392	3	0	0	0	0	0
FVEG_01391	hypothetical protein FG01262.1 [Gibberella zeae PH-1]	1	2007392	hypothetical protein		11.0875	3	0	0	0	0	0
FVEG_01390	hypothetical protein FG01261.1 [Gibberella zeae PH-1]	1	2009154	hypothetical protein		8.94693	6	0	0	0	0	0
FVEG_01389	hypothetical protein FG01259.1 [Gibberella zeae PH-1]	1	2012611	hypothetical protein		14.4703	3	0	0	0	0	0
FVEG_01388	hypothetical protein FG01258.1 [Gibberella zeae PH-1]	1	2015401	hypothetical protein		14.3358	5	0	0	0	0	0
FVEG_01387	hypothetical protein FG01257.1 [Gibberella zeae PH-1]	1	2016928	hypothetical protein		0	1	0	0	0	0	0
FVEG_01386	hypothetical protein FG01256.1 [Gibberella zeae PH-1]	1	2020083	hypothetical protein		9.91698	3	0	0	0	0	0
FVEG_01385	hypothetical protein FG01254.1 [Gibberella zeae PH-1]	1	2022796	hypothetical protein		11.5175	6	0	0	0	0	0
FVEG_01384	hypothetical protein FG01252.1 [Gibberella zeae PH-1]	1	2037827	hypothetical protein		20.7347	5	0	0	0	0	0
FVEG_01383	hypothetical protein NECHADRAFT_74520 [Nectria haematococca mpVI 77-13-4]_x0001_gb|EEU47699.1| hypothetical protein NECHADRAFT_74520 [Nectria haematococca mpVI 77-13-4]	1	2041499	hypothetical protein		12.3294	6	0	0	0	0	0
FVEG_01382	hypothetical protein FG01250.1 [Gibberella zeae PH-1]	1	2046817	hypothetical protein		10.8646	6	0	0	0	0	0
FVEG_01381	hypothetical protein FG01249.1 [Gibberella zeae PH-1]	1	2050190	hypothetical protein		10.2493	6	0	0	0	0	0
FVEG_01380	hypothetical protein FG01248.1 [Gibberella zeae PH-1]	1	2058052	threonyl-tRNA synthetase		0	1	0	0	0	0	0
FVEG_01379	hypothetical protein NECHADRAFT_74516 [Nectria haematococca mpVI 77-13-4]_x0001_gb|EEU47696.1| hypothetical protein NECHADRAFT_74516 [Nectria haematococca mpVI 77-13-4]	1	2061261	hypothetical protein		8.29266	6	0	0	0	0	0
FVEG_01378	hypothetical protein NECHADRAFT_74515 [Nectria haematococca mpVI 77-13-4]_x0001_gb|EEU48401.1| hypothetical protein NECHADRAFT_74515 [Nectria haematococca mpVI 77-13-4]	1	2062580	hypothetical protein		9.98958	5	0	0	0	0	0
FVEG_01377	hypothetical protein FG01246.1 [Gibberella zeae PH-1]	1	2063423	protein disulfide-isomerase precursor		0	1	0	0	0	0	0
FVEG_01376	hypothetical protein FG01246.1 [Gibberella zeae PH-1]	1	2067111	hypothetical protein		8.40896	5	0	0	0	0	0
FVEG_01375	hypothetical protein LOC100273188 [Zea mays]_x0001_gb|ACF85410.1| unknown [Zea mays]	1	2069795	cytochrome c peroxidase, mitochondrial precursor		-5.95507	4	0	0	0	0	0
FVEG_01374	hypothetical protein FG01244.1 [Gibberella zeae PH-1]	1	2073143	hypothetical protein		18.8412	6	0	0	0	0	0
FVEG_01373	hypothetical protein FG01244.1 [Gibberella zeae PH-1]	1	2074643	hypothetical protein		21.0952	5	0	0	0	0	0
FVEG_01372	hypothetical protein FG01243.1 [Gibberella zeae PH-1]	1	2078083	hypothetical protein		-0.21433	2	0	0	0	0	0
FVEG_01371	hypothetical protein FG01242.1 [Gibberella zeae PH-1]	1	2082580	hypothetical protein		18.6711	5	0	0	0	0	0
FVEG_01370	hypothetical protein MGG_13806 [Magnaporthe oryzae 70-15]_x0001_gb|EDJ96018.1| hypothetical protein MGG_13806 [Magnaporthe oryzae 70-15]	1	2083910	protein BMH2		21.8568	5	21.8568	11	5	0	0
FVEG_01369	hypothetical protein FG01240.1 [Gibberella zeae PH-1]	1	2089461	hypothetical protein		18.7197	5	21.8568	11	5	0	0
FVEG_01368	hypothetical protein FG01239.1 [Gibberella zeae PH-1]	1	2091316	hypothetical protein		3.25258	3	21.8568	11	5	0	0
FVEG_01367	RL36_TRIHM 60S ribosomal protein L36 (TRP36) [Gibberella zeae PH-1]	1	2093449	hypothetical protein		7.24374	6	21.8568	11	5	0	0
FVEG_01366	hypothetical protein FG01237.1 [Gibberella zeae PH-1]	1	2094374	hypothetical protein		9.33747	6	21.8568	11	5	0	0
FVEG_01365	predicted protein [Nectria haematococca mpVI 77-13-4]_x0001_gb|EEU48397.1| predicted protein [Nectria haematococca mpVI 77-13-4]	1	2096981	proteasome component PUP3		12.3428	5	21.8568	11	5	0	0
FVEG_01364	putative maltase MLT2 [Gibberella moniliformis]	1	2098286	oligo-1,6-glucosidase		14.4479	5	21.8568	11	5	0	0
FVEG_01363	adenylate cyclase, ACY [Metarhizium acridum CQMa 102]	1	2104171	adenylate cyclase		0	1	21.8568	11	5	0	0
FVEG_01362	hypothetical protein NECHADRAFT_105807 [Nectria haematococca mpVI 77-13-4]_x0001_gb|EEU48411.1| hypothetical protein NECHADRAFT_105807 [Nectria haematococca mpVI 77-13-4]	1	2112013	hypothetical protein		-5.00983	2	21.8568	11	5	0	0
FVEG_01361	hypothetical protein FG01232.1 [Gibberella zeae PH-1]	1	2114292	hypothetical protein		-9.81055	2	21.8568	11	5	0	0
FVEG_01360	hypothetical protein FG01231.1 [Gibberella zeae PH-1]	1	2115161	hypothetical protein		0	1	21.8568	11	5	0	0
FVEG_01359	hypothetical protein FG01230.1 [Gibberella zeae PH-1]	1	2122667	mitochondrial phosphate carrier protein 2		3.12894	5	0	0	0	0	0
FVEG_01358	predicted protein [Nectria haematococca mpVI 77-13-4]_x0001_gb|EEU47705.1| predicted protein [Nectria haematococca mpVI 77-13-4]	1	2125298	hypothetical protein		3.57103	6	0	0	0	0	0
FVEG_01357	hypothetical protein FG01228.1 [Gibberella zeae PH-1]	1	2126270	hypothetical protein		10.8846	3	0	0	0	0	0
FVEG_01356	hypothetical protein FG01227.1 [Gibberella zeae PH-1]	1	2128513	hypothetical protein		0	1	0	0	0	0	0
FVEG_01355	hypothetical protein FG01226.1 [Gibberella zeae PH-1]_x0001_sp|Q4INI2.1|CAPZB_GIBZE RecName: Full=F-actin-capping protein subunit beta	1	2134785	F-actin capping protein subunit beta isoforms 1 and 2		12.7498	3	0	0	0	0	0
FVEG_01354	hypothetical protein NECHADRAFT_74541 [Nectria haematococca mpVI 77-13-4]_x0001_gb|EEU48417.1| hypothetical protein NECHADRAFT_74541 [Nectria haematococca mpVI 77-13-4]	1	2136272	hypothetical protein		0	1	0	0	0	0	0
FVEG_01353	hypothetical protein FG01225.1 [Gibberella zeae PH-1]	1	2139519	hypothetical protein		9.928	3	0	0	0	0	0
FVEG_01352	hypothetical protein FG01224.1 [Gibberella zeae PH-1]	1	2142621	hypothetical protein		19.2904	2	0	0	0	0	0
FVEG_01351	hypothetical protein FG01223.1 [Gibberella zeae PH-1]	1	2144543	hypothetical protein		23.5231	2	0	0	0	0	0
FVEG_01350	hypothetical protein FG01222.1 [Gibberella zeae PH-1]	1	2146090	hypothetical protein		4.20173	6	0	0	0	0	0
FVEG_01349	hypothetical protein FG01221.1 [Gibberella zeae PH-1]	1	2148131	hypothetical protein		14.5065	2	0	0	0	0	0
FVEG_01348	hypothetical protein FG01221.1 [Gibberella zeae PH-1]	1	2148767	hypothetical protein		17.2303	3	0	0	0	0	0
FVEG_01347	hypothetical protein FG01220.1 [Gibberella zeae PH-1]	1	2149941	DNA-directed RNA polymerase II 19 kDa polypeptide		-4.81438	4	0	0	0	0	0
FVEG_01346	hypothetical protein FG01219.1 [Gibberella zeae PH-1]	1	2152190	hypothetical protein		21.8665	3	0	0	0	0	0
FVEG_01345	-	1	2155265	hypothetical protein		28.9611	3	0	0	0	0	0
FVEG_01344	hypothetical protein FG01217.1 [Gibberella zeae PH-1]	1	2158733	carbamoyl-phosphate synthase arginine-specific large chain		17.9737	6	0	0	0	0	0
FVEG_01343	hypothetical protein FG01216.1 [Gibberella zeae PH-1]	1	2163381	hypothetical protein		18.745	1	0	0	0	0	0
FVEG_01342	hypothetical protein NECHADRAFT_74555 [Nectria haematococca mpVI 77-13-4]_x0001_gb|EEU47709.1| hypothetical protein NECHADRAFT_74555 [Nectria haematococca mpVI 77-13-4]	1	2166029	hypothetical protein		28.1794	3	0	0	0	0	0
FVEG_01341	predicted protein [Nectria haematococca mpVI 77-13-4]_x0001_gb|EEU48428.1| predicted protein [Nectria haematococca mpVI 77-13-4]	1	2167199	hypothetical protein		36.6707	3	0	0	0	0	0
FVEG_01340	hypothetical protein FG01212.1 [Gibberella zeae PH-1]	1	2169931	hypothetical protein		49.9315	3	49.9315	3	3	0	0
FVEG_01339	hypothetical protein FG01211.1 [Gibberella zeae PH-1]	1	2172774	hypothetical protein		17.7758	1	49.9315	3	3	0	0
FVEG_01338	predicted protein [Nectria haematococca mpVI 77-13-4]_x0001_gb|EEU48431.1| predicted protein [Nectria haematococca mpVI 77-13-4]	1	2175995	hypothetical protein		14.9707	1	49.9315	3	3	0	0
FVEG_01337	hypothetical protein FG01209.1 [Gibberella zeae PH-1]	1	2183283	hypothetical protein		13.0598	3	0	0	0	0	0
FVEG_01336	replication factor C [Glomerella graminicola M1.001]	1	2184958	replication factor C subunit 2		0	1	0	0	0	0	0
FVEG_01335	hypothetical protein FG01207.1 [Gibberella zeae PH-1]	1	2187479	hypothetical protein		-5.35466	5	0	0	0	0	0
FVEG_01334	hypothetical protein NECHADRAFT_98701 [Nectria haematococca mpVI 77-13-4]_x0001_gb|EEU48433.1| hypothetical protein NECHADRAFT_98701 [Nectria haematococca mpVI 77-13-4]	1	2189866	hypothetical protein		12.4433	1	0	0	0	0	0
FVEG_01333	hypothetical protein FG01205.1 [Gibberella zeae PH-1]	1	2193183	hypothetical protein		14.7661	3	0	0	0	0	0
FVEG_01332	hypothetical protein NECHADRAFT_103079 [Nectria haematococca mpVI 77-13-4]_x0001_gb|EEU47713.1| hypothetical protein NECHADRAFT_103079 [Nectria haematococca mpVI 77-13-4]	1	2195457	hypothetical protein		21.333	1	0	0	0	0	0
FVEG_01331	hypothetical protein FG01204.1 [Gibberella zeae PH-1]	1	2200207	hypothetical protein		36.9732	1	0	0	0	0	0
FVEG_01330	hypothetical protein FG01203.1 [Gibberella zeae PH-1]	1	2204866	hypothetical protein		37.2481	1	0	0	0	0	0
FVEG_01329	hypothetical protein FG01202.1 [Gibberella zeae PH-1]	1	2206814	hypothetical protein		37.0469	1	0	0	0	0	0
FVEG_01328	hypothetical protein FG01201.1 [Gibberella zeae PH-1]	1	2208478	hypothetical protein		6.92593	6	0	0	0	0	0
FVEG_01327	hypothetical protein FG01200.1 [Gibberella zeae PH-1]	1	2210282	hypothetical protein		34.0266	1	0	0	0	0	0
FVEG_01326	TPA_inf: glutamine:fructose-6-phosphate amidotransferase [Gibberella zeae]	1	2211960	glucosamine-fructose-6-phosphate aminotransferase		33.8708	1	0	0	0	0	0
FVEG_01325	hypothetical protein FG01198.1 [Gibberella zeae PH-1]	1	2218631	hypothetical protein		35.2914	1	0	0	0	0	0
FVEG_01324	hypothetical protein FG01197.1 [Gibberella zeae PH-1]	1	2221147	hypothetical protein		-7.18582	4	0	0	0	0	0
FVEG_01323	predicted protein [Nectria haematococca mpVI 77-13-4]_x0001_gb|EEU47717.1| predicted protein [Nectria haematococca mpVI 77-13-4]	1	2223695	hypothetical protein		33.1685	1	0	0	0	0	0
FVEG_01322	hypothetical protein FG01195.1 [Gibberella zeae PH-1]	1	2227874	hypothetical protein		38.3306	1	0	0	0	0	0
FVEG_01321	hypothetical protein FG01194.1 [Gibberella zeae PH-1]	1	2229077	ubiquitin ligase protein		36.7709	1	0	0	0	0	0
FVEG_01320	hypothetical protein FG01193.1 [Gibberella zeae PH-1]	1	2236672	hypothetical protein		7.35908	6	0	0	0	0	0
FVEG_01319	hypothetical protein FG01191.1 [Gibberella zeae PH-1]	1	2247256	hypothetical protein		28.441	1	0	0	0	0	0
FVEG_01318	hypothetical protein FG01190.1 [Gibberella zeae PH-1]	1	2250087	hypothetical protein		40.1104	1	0	0	0	0	0
FVEG_01317	hypothetical protein FG01189.1 [Gibberella zeae PH-1]	1	2251175	mitochondrial import inner membrane translocase subunit tim-54		35.8266	1	0	0	0	0	0
FVEG_01316	putative serine/threonine kinase [Metarhizium anisopliae ARSEF 23]	1	2254854	serine/threonine-protein kinase cot-1		37.4732	1	0	0	0	0	0
FVEG_01315	hypothetical protein FG01187.1 [Gibberella zeae PH-1]	1	2257490	hypothetical protein		36.3911	1	0	0	0	0	0
FVEG_01314	hypothetical protein FG01186.1 [Gibberella zeae PH-1]	1	2259101	hypothetical protein		33.477	1	0	0	0	0	0
FVEG_01313	hypothetical protein FG01185.1 [Gibberella zeae PH-1]	1	2261356	hypothetical protein		36.9202	1	0	0	0	0	0
FVEG_01312	hypothetical protein FG01184.1 [Gibberella zeae PH-1]	1	2262222	mitotic control protein dis3		0	1	0	0	0	0	0
FVEG_01311	hypothetical protein FG01183.1 [Gibberella zeae PH-1]	1	2275504	hypothetical protein		19.0458	1	0	0	0	0	0
FVEG_01310	hypothetical protein FG01182.1 [Gibberella zeae PH-1]	1	2279225	hypothetical protein		-23.9437	5	0	0	0	0	0
FVEG_01309	hypothetical protein FG01181.1 [Gibberella zeae PH-1]	1	2281231	hypothetical protein		7.38164	3	0	0	0	0	0
FVEG_01308	-	1	2284379	hypothetical protein		25.6105	1	0	0	0	0	0
FVEG_01307	hypothetical protein FG01180.1 [Gibberella zeae PH-1]	1	2291982	hypothetical protein		44.473	1	0	0	0	0	0
FVEG_01306	hypothetical protein FG01179.1 [Gibberella zeae PH-1]	1	2294148	hypothetical protein		51.1391	1	51.1391	5	1	0	0
FVEG_01305	hypothetical protein FG01178.1 [Gibberella zeae PH-1]	1	2300201	hypothetical protein		-24.6506	5	51.1391	5	1	0	0
FVEG_01304	hypothetical protein FG01177.1 [Gibberella zeae PH-1]	1	2301565	cystathionine gamma-lyase		3.45766	6	51.1391	5	1	0	0
FVEG_01303	hypothetical protein FG01176.1 [Gibberella zeae PH-1]	1	2307486	hypothetical protein		-5.94954	4	51.1391	5	1	0	0
FVEG_01302	hypothetical protein FG01175.1 [Gibberella zeae PH-1]	1	2310037	ribosome biogenesis protein RPF2		-9.18873	5	51.1391	5	1	0	0
FVEG_01301	hypothetical protein FG01174.1 [Gibberella zeae PH-1]	1	2311458	peroxisomal targeting signal receptor		-38.7814	5	38.7814	4	5	0	0
FVEG_01300	hypothetical protein FG01173.1 [Gibberella zeae PH-1]	1	2321455	hypothetical protein		-15.6935	2	38.7814	4	5	0	0
FVEG_01299	hypothetical protein FG01172.1 [Gibberella zeae PH-1]	1	2324596	hypothetical protein		-6.06121	1	38.7814	4	5	0	0
FVEG_01298	hypothetical protein FG01171.1 [Gibberella zeae PH-1]	1	2326371	hypothetical protein		0	1	38.7814	4	5	0	0
FVEG_01297	F-box domain-containing protein [Glomerella graminicola M1.001]	1	2329316	hypothetical protein		0	1	0	0	0	0	0
FVEG_01296	hypothetical protein FG01170.1 [Gibberella zeae PH-1]	1	2331023	hypothetical protein		-6.76292	4	0	0	0	0	0
FVEG_01295	-	1	2332422	hypothetical protein		-7.43237	4	0	0	0	0	0
FVEG_01294	hypothetical protein FG01169.1 [Gibberella zeae PH-1]	1	2333990	hypothetical protein		-1.2585	5	0	0	0	0	0
FVEG_01293	hypothetical protein FG01168.1 [Gibberella zeae PH-1]	1	2336188	hypothetical protein		3.71229	3	0	0	0	0	0
FVEG_01292	hypothetical protein FG01167.1 [Gibberella zeae PH-1]	1	2337927	hypothetical protein		12.6901	6	0	0	0	0	0
FVEG_01291	hypothetical protein FG01166.1 [Gibberella zeae PH-1]	1	2340259	hypothetical protein		20.0101	6	0	0	0	0	0
FVEG_01290	hypothetical protein FG01165.1 [Gibberella zeae PH-1]	1	2347003	hypothetical protein		0	1	0	0	0	0	0
FVEG_01289	hypothetical protein FG01164.1 [Gibberella zeae PH-1]	1	2351649	6,7-dimethyl-8-ribityllumazine synthase		13.0218	6	0	0	0	0	0
FVEG_01288	hypothetical protein NECHADRAFT_103095 [Nectria haematococca mpVI 77-13-4]_x0001_gb|EEU48454.1| hypothetical protein NECHADRAFT_103095 [Nectria haematococca mpVI 77-13-4]	1	2352780	hypothetical protein		28.7389	6	0	0	0	0	0
FVEG_01287	hypothetical protein FG01162.1 [Gibberella zeae PH-1]	1	2362228	hypothetical protein		-12.2994	4	0	0	0	0	0
FVEG_01286	hypothetical protein FG01161.1 [Gibberella zeae PH-1]	1	2364902	hypothetical protein		0	1	0	0	0	0	0
FVEG_01285	hypothetical protein FG01160.1 [Gibberella zeae PH-1]	1	2371114	proteasome component C5		-61.5226	5	61.5226	3	5	0	0
FVEG_01284	hypothetical protein FG01159.1 [Gibberella zeae PH-1]	1	2380571	hypothetical protein		8.69488	3	61.5226	3	5	0	0
FVEG_01283	hypothetical protein FG01158.1 [Gibberella zeae PH-1]	1	2385819	30 kDa heat shock protein		0	1	61.5226	3	5	0	0
FVEG_01282	DNA repair protein RAD51 [Metarhizium acridum CQMa 102]	1	2387571	DNA repair protein RAD51		24.7046	2	0	0	0	0	0
FVEG_01281	hypothetical protein NECHADRAFT_89992 [Nectria haematococca mpVI 77-13-4]_x0001_gb|EEU47736.1| hypothetical protein NECHADRAFT_89992 [Nectria haematococca mpVI 77-13-4]	1	2389321	hypothetical protein		0	1	0	0	0	0	0
FVEG_01280	hypothetical protein FG01155.1 [Gibberella zeae PH-1]	1	2392992	vacuolar protein sorting 26B-B		20.3983	2	0	0	0	0	0
FVEG_01279	hypothetical protein FG01154.1 [Gibberella zeae PH-1]	1	2394783	60S ribosomal protein L9-B		14.5503	3	0	0	0	0	0
FVEG_01278	hypothetical protein FG01153.1 [Gibberella zeae PH-1]	1	2396020	hypothetical protein		14.9075	3	0	0	0	0	0
FVEG_01277	hypothetical protein FG01152.1 [Gibberella zeae PH-1]	1	2399330	hypothetical protein		31.968	2	0	0	0	0	0
FVEG_01276	hypothetical protein FG01151.1 [Gibberella zeae PH-1]	1	2401699	aminomethyltransferase, mitochondrial precursor		1.67861	6	0	0	0	0	0
FVEG_01275	hypothetical protein FG01150.1 [Gibberella zeae PH-1]	1	2405353	endopolyphosphatase		11.273	1	0	0	0	0	0
FVEG_01274	hypothetical protein FG01149.1 [Gibberella zeae PH-1]	1	2408450	hypothetical protein		19.9188	3	0	0	0	0	0
FVEG_01273	hypothetical protein FG01147.1 [Gibberella zeae PH-1]	1	2413547	hypothetical protein		48.8441	2	0	0	0	0	0
FVEG_01272	hypothetical protein FG01146.1 [Gibberella zeae PH-1]	1	2417257	hypothetical protein		18.5497	3	0	0	0	0	0
FVEG_01271	-	1	2419605	hypothetical protein		39.4057	2	0	0	0	0	0
FVEG_01270	hypothetical protein FG01145.1 [Gibberella zeae PH-1]	1	2421440	hypothetical protein		6.33013	6	0	0	0	0	0
FVEG_01269	hypothetical protein FG01144.1 [Gibberella zeae PH-1]	1	2422793	hypothetical protein		33.0446	3	0	0	0	0	0
FVEG_01268	hypothetical protein FG01142.1 [Gibberella zeae PH-1]	1	2432466	hypothetical protein		33.4514	3	0	0	0	0	0
FVEG_01267	hypothetical protein FG01141.1 [Gibberella zeae PH-1]	1	2436727	delta-1-pyrroline-5-carboxylate dehydrogenase		33.8426	2	0	0	0	0	0
FVEG_01266	hypothetical protein FG01139.1 [Gibberella zeae PH-1]	1	2440226	hypothetical protein		39.0348	3	0	0	0	0	0
FVEG_01265	hypothetical protein FG01138.1 [Gibberella zeae PH-1]	1	2442140	hypothetical protein		64.0039	3	64.0039	11	3	0	0
FVEG_01264	hypothetical protein FG01137.1 [Gibberella zeae PH-1]	1	2444271	hypothetical protein		38.2589	2	64.0039	11	3	0	0
FVEG_01263	hypothetical protein FG01136.1 [Gibberella zeae PH-1]	1	2447391	hypothetical protein		38.4432	3	64.0039	11	3	0	0
FVEG_01262	predicted protein [Nectria haematococca mpVI 77-13-4]_x0001_gb|EEU47747.1| predicted protein [Nectria haematococca mpVI 77-13-4]	1	2448433	TGF-beta-inducible nuclear protein 1		38.4841	3	64.0039	11	3	0	0
FVEG_01261	hypothetical protein FG01134.1 [Gibberella zeae PH-1]	1	2450176	HNRNP arginine N-methyltransferase		46.6446	3	64.0039	11	3	0	0
FVEG_01260	hypothetical protein FG01133.1 [Gibberella zeae PH-1]	1	2451917	hypothetical protein		45.3569	3	64.0039	11	3	0	0
FVEG_01259	hypothetical protein FG01132.1 [Gibberella zeae PH-1]_x0001_sp|Q4INS6.1|MUS81_GIBZE RecName: Full=Crossover junction endonuclease MUS81	1	2455090	crossover junction endonuclease mus-81		0	1	64.0039	11	3	0	0
FVEG_01258	hypothetical protein FG01131.1 [Gibberella zeae PH-1]	1	2456777	riboflavin synthase alpha chain		28.0668	3	64.0039	11	3	0	0
FVEG_01257	hypothetical protein FG01130.1 [Gibberella zeae PH-1]	1	2458281	hypothetical protein		0	1	64.0039	11	3	0	0
FVEG_01256	hypothetical protein FG01129.1 [Gibberella zeae PH-1]	1	2459862	hypothetical protein		-1.81118	4	64.0039	11	3	0	0
FVEG_01255	hypothetical protein FG01128.1 [Gibberella zeae PH-1]	1	2462692	hypothetical protein		0	1	64.0039	11	3	0	0
FVEG_01254	hypothetical protein FG01127.1 [Gibberella zeae PH-1]	1	2466285	hypothetical protein		2.41241	3	0	0	0	0	0
FVEG_01253	hypothetical protein FG01126.1 [Gibberella zeae PH-1]	1	2468436	hypothetical protein		3.39288	2	0	0	0	0	0
FVEG_01252	hypothetical protein FG01125.1 [Gibberella zeae PH-1]	1	2470715	hypothetical protein		5.63663	3	0	0	0	0	0
FVEG_01251	hypothetical protein FG01123.1 [Gibberella zeae PH-1]	1	2472885	hypothetical protein		6.49353	2	0	0	0	0	0
FVEG_01250	hypothetical protein FG01122.1 [Gibberella zeae PH-1]	1	2474298	hypothetical protein		0	1	0	0	0	0	0
FVEG_01249	hypothetical protein NECHADRAFT_98746 [Nectria haematococca mpVI 77-13-4]_x0001_gb|EEU48468.1| hypothetical protein NECHADRAFT_98746 [Nectria haematococca mpVI 77-13-4]	1	2475760	hypothetical protein		3.99733	6	0	0	0	0	0
FVEG_01248	hypothetical protein FG01120.1 [Gibberella zeae PH-1]	1	2478312	hypothetical protein		-4.50691	5	0	0	0	0	0
FVEG_01247	hypothetical protein FG01119.1 [Gibberella zeae PH-1]	1	2482435	prohibitin-2		5.1423	1	0	0	0	0	0
FVEG_01246	hypothetical protein FG01118.1 [Gibberella zeae PH-1]	1	2484195	hypothetical protein		9.55909	6	0	0	0	0	0
FVEG_01245	hypothetical protein FG01117.1 [Gibberella zeae PH-1]	1	2485208	hypothetical protein		9.40101	3	0	0	0	0	0
FVEG_01244	hypothetical protein NECHADRAFT_74647 [Nectria haematococca mpVI 77-13-4]_x0001_gb|EEU47758.1| hypothetical protein NECHADRAFT_74647 [Nectria haematococca mpVI 77-13-4]	1	2487204	hypothetical protein		10.7372	6	0	0	0	0	0
FVEG_01243	hypothetical protein FG01115.1 [Gibberella zeae PH-1]	1	2489035	hypothetical protein		0	1	0	0	0	0	0
FVEG_01242	-	1	2490677	hypothetical protein		-34.9827	5	34.9827	3	5	0	0
FVEG_01241	predicted protein [Nectria haematococca mpVI 77-13-4]_x0001_gb|EEU47759.1| predicted protein [Nectria haematococca mpVI 77-13-4]	1	2491869	hypothetical protein		-14.6474	4	34.9827	3	5	0	0
FVEG_01240	hypothetical protein FG01113.1 [Gibberella zeae PH-1]	1	2496624	hypothetical protein		17.4258	6	34.9827	3	5	0	0
FVEG_01239	hypothetical protein FG01112.1 [Gibberella zeae PH-1]	1	2499267	hypothetical protein		17.6384	6	0	0	0	0	0
FVEG_01238	hypothetical protein LOC100274495 [Zea mays]_x0001_gb|ACF88192.1| unknown [Zea mays]	1	2502477	6-phosphogluconate dehydrogenase		14.1153	3	0	0	0	0	0
FVEG_01237	hypothetical protein FG01110.1 [Gibberella zeae PH-1]	1	2507246	hypothetical protein		12.5974	6	0	0	0	0	0
FVEG_01236	hypothetical protein FG01109.1 [Gibberella zeae PH-1]	1	2509011	hypothetical protein		2.78584	2	0	0	0	0	0
FVEG_01235	hypothetical protein FG01108.1 [Gibberella zeae PH-1]	1	2514246	hypothetical protein		10.089	6	0	0	0	0	0
FVEG_01234	hypothetical protein FG01107.1 [Gibberella zeae PH-1]	1	2517711	hypothetical protein		18.7033	3	0	0	0	0	0
FVEG_01233	hypothetical protein FG01106.1 [Gibberella zeae PH-1]	1	2521242	hypothetical protein		17.5275	3	0	0	0	0	0
FVEG_01232	hypothetical protein FG01105.1 [Gibberella zeae PH-1]	1	2524349	hypothetical protein		16.8475	3	0	0	0	0	0
FVEG_01231	hypothetical protein FG01104.1 [Gibberella zeae PH-1]	1	2527970	phenylalanyl-tRNA synthetase alpha chain		3.02015	5	0	0	0	0	0
FVEG_01230	hypothetical protein FG01103.1 [Gibberella zeae PH-1]	1	2529993	hypothetical protein		14.1879	3	0	0	0	0	0
FVEG_01229	hypothetical protein FG01102.1 [Gibberella zeae PH-1]	1	2531442	hypothetical protein		7.19	6	0	0	0	0	0
FVEG_01228	hypothetical protein FG01101.1 [Gibberella zeae PH-1]	1	2532938	hypothetical protein		0	1	0	0	0	0	0
FVEG_01227	hypothetical protein FG01096.1 [Gibberella zeae PH-1]	1	2535626	hypothetical protein		7.92185	6	0	0	0	0	0
FVEG_01226	hypothetical protein FG01095.1 [Gibberella zeae PH-1]	1	2537563	hypothetical protein		6.40134	1	0	0	0	0	0
FVEG_01225	hypothetical protein FG01094.1 [Gibberella zeae PH-1]	1	2540846	hypothetical protein		9.36703	3	0	0	0	0	0
FVEG_01224	hypothetical protein FG01097.1 [Gibberella zeae PH-1]	1	2542118	hypothetical protein		-0.989279	5	0	0	0	0	0
FVEG_01223	hypothetical protein FG01098.1 [Gibberella zeae PH-1]	1	2544238	hypothetical protein		12.7162	6	0	0	0	0	0
FVEG_01222	RAN_BRUMA GTP-binding nuclear protein RAN/TC4 [Gibberella zeae PH-1]_x0001_ref|XP_003053481.1| predicted protein [Nectria haematococca mpVI 77-13-4]_x0001_gb|EEU47768.1| predicted protein [Nectria haematococca mpVI 77-13-4]	1	2546536	GTP-binding nuclear protein Ran		24.3652	6	0	0	0	0	0
FVEG_01221	hypothetical protein FG01100.1 [Gibberella zeae PH-1]	1	2550670	hypothetical protein		29.4812	6	29.4812	5	6	0	0
FVEG_01220	hypothetical protein FG01090.1 [Gibberella zeae PH-1]	1	2554483	hypothetical protein		22.1327	3	29.4812	5	6	0	0
FVEG_01219	hypothetical protein FG01091.1 [Gibberella zeae PH-1]	1	2558685	hypothetical protein		17.2188	6	29.4812	5	6	0	0
FVEG_01218	hypothetical protein FG01092.1 [Gibberella zeae PH-1]_x0001_sp|Q4INW6.1|PTPA2_GIBZE RecName: Full=Serine/threonine-protein phosphatase 2A activator 2; AltName: Full=Peptidyl-prolyl cis-trans isomerase PTPA-2; Short=PPIase PTPA-2; Short=Rotamase PTPA-2; AltName: Full=Phosphotyrosyl phosphatase activator 2	1	2560595	serine/threonine-protein phosphatase 2A activator 2		0	1	29.4812	5	6	0	0
FVEG_01217	hypothetical protein FG01088.1 [Gibberella zeae PH-1]	1	2564113	hypothetical protein		0	1	29.4812	5	6	0	0
FVEG_01216	hypothetical protein FG01085.1 [Gibberella zeae PH-1]	1	2576073	hypothetical protein		0	1	0	0	0	0	0
FVEG_01215	hypothetical protein NECHADRAFT_74679 [Nectria haematococca mpVI 77-13-4]_x0001_gb|EEU48487.1| hypothetical protein NECHADRAFT_74679 [Nectria haematococca mpVI 77-13-4]	1	2581360	hypothetical protein		-19.154	5	19.154	3	5	0	0
FVEG_01214	hypothetical protein FG01084.1 [Gibberella zeae PH-1]	1	2581618	hypothetical protein		1.10426	6	19.154	3	5	0	0
FVEG_01213	hypothetical protein NECHADRAFT_102364 [Nectria haematococca mpVI 77-13-4]_x0001_gb|EEU48486.1| hypothetical protein NECHADRAFT_102364 [Nectria haematococca mpVI 77-13-4]	1	2583322	hypothetical protein		0	1	19.154	3	5	0	0
FVEG_01212	small nuclear ribonucleoprotein [Grosmannia clavigera kw1407]	1	2585314	hypothetical protein		3.5791	3	3.5791	3	3	0	0
FVEG_01211	hypothetical protein FG01081.1 [Gibberella zeae PH-1]	1	2586993	60S ribosomal protein L11		-2.18075	5	3.5791	3	3	0	0
FVEG_01210	hypothetical protein LOC100273100 [Zea mays]_x0001_gb|ACF85197.1| unknown [Zea mays]	1	2589666	hypothetical protein		0	1	3.5791	3	3	0	0
FVEG_01209	-	1	2594735	hypothetical protein		-14.8479	5	14.8479	4	5	0	0
FVEG_01208	hypothetical protein FG01069.1 [Gibberella zeae PH-1]	1	2597246	hypothetical protein		0	1	14.8479	4	5	0	0
FVEG_01207	hypothetical protein FG01074.1 [Gibberella zeae PH-1]	1	2601816	hypothetical protein		0	1	14.8479	4	5	0	0
FVEG_01206	hypothetical protein FG01067.1 [Gibberella zeae PH-1]	1	2605697	hypothetical protein		-3.72219	4	14.8479	4	5	0	0
FVEG_01205	-	1	2610399	hypothetical protein		-4.35256	4	0	0	0	0	0
FVEG_01204	hypothetical protein FG01068.1 [Gibberella zeae PH-1]	1	2612992	hypothetical protein		6.53946	6	0	0	0	0	0
FVEG_01203	hypothetical protein FG01071.1 [Gibberella zeae PH-1]	1	2615431	hypothetical protein		-1.25419	2	0	0	0	0	0
FVEG_01202	hypothetical protein FG01072.1 [Gibberella zeae PH-1]	1	2618447	hypothetical protein		7.90912	6	0	0	0	0	0
FVEG_01201	hypothetical protein FG01071.1 [Gibberella zeae PH-1]	1	2619924	hypothetical protein		1.37348	1	0	0	0	0	0
FVEG_01200	hypothetical protein FG01070.1 [Gibberella zeae PH-1]	1	2631078	hypothetical protein		6.75096	6	0	0	0	0	0
FVEG_01199	hypothetical protein FG01066.1 [Gibberella zeae PH-1]	1	2632270	hypothetical protein		11.015	6	0	0	0	0	0
FVEG_01197	hypothetical protein FG01065.1 [Gibberella zeae PH-1]	1	2638344	hypothetical protein		12.2063	6	0	0	0	0	0
FVEG_01198	hypothetical protein FG01064.1 [Gibberella zeae PH-1]	1	2641005	hypothetical protein		13.8489	5	0	0	0	0	0
FVEG_01196	hypothetical protein FG01062.1 [Gibberella zeae PH-1]	1	2644681	hypothetical protein		-3.54988	4	0	0	0	0	0
FVEG_01195	hypothetical protein NECHADRAFT_74692 [Nectria haematococca mpVI 77-13-4]_x0001_gb|EEU47778.1| hypothetical protein NECHADRAFT_74692 [Nectria haematococca mpVI 77-13-4]	1	2648745	hypothetical protein		-71.6523	2	71.6523	3	2	0	0
FVEG_01194	hypothetical protein NECHADRAFT_74692 [Nectria haematococca mpVI 77-13-4]_x0001_gb|EEU47778.1| hypothetical protein NECHADRAFT_74692 [Nectria haematococca mpVI 77-13-4]	1	2649067	hypothetical protein		0	1	71.6523	3	2	0	0
FVEG_01193	hypothetical protein FG01060.1 [Gibberella zeae PH-1]	1	2651035	hypothetical protein		2.70217	3	71.6523	3	2	0	0
FVEG_01192	hypothetical protein NECHADRAFT_74694 [Nectria haematococca mpVI 77-13-4]_x0001_gb|EEU47780.1| hypothetical protein NECHADRAFT_74694 [Nectria haematococca mpVI 77-13-4]	1	2652652	hypothetical protein		0	1	0	0	0	0	0
FVEG_01191	hypothetical protein FG01058.1 [Gibberella zeae PH-1]	1	2655170	hypothetical protein		-24.5084	5	24.5084	3	5	0	0
FVEG_01190	hypothetical protein NECHADRAFT_74696 [Nectria haematococca mpVI 77-13-4]_x0001_gb|EEU48495.1| hypothetical protein NECHADRAFT_74696 [Nectria haematococca mpVI 77-13-4]	1	2657909	hypothetical protein		4.6243	6	24.5084	3	5	0	0
FVEG_01189	hypothetical protein FG01056.1 [Gibberella zeae PH-1]	1	2660911	hypothetical protein		-3.00188	4	24.5084	3	5	0	0
FVEG_01188	hypothetical protein NECHADRAFT_30745 [Nectria haematococca mpVI 77-13-4]_x0001_gb|EEU48496.1| hypothetical protein NECHADRAFT_30745 [Nectria haematococca mpVI 77-13-4]	1	2661762	hypothetical protein		12.3216	5	0	0	0	0	0
FVEG_01187	hypothetical protein NECHADRAFT_74699 [Nectria haematococca mpVI 77-13-4]_x0001_gb|EEU47783.1| hypothetical protein NECHADRAFT_74699 [Nectria haematococca mpVI 77-13-4]	1	2664704	hypothetical protein		8.32909	2	0	0	0	0	0
FVEG_01186	predicted protein [Nectria haematococca mpVI 77-13-4]_x0001_gb|EEU47784.1| predicted protein [Nectria haematococca mpVI 77-13-4]	1	2666654	deoxyuridine 5'-triphosphate nucleotidohydrolase		11.1897	5	0	0	0	0	0
FVEG_01185	hypothetical protein FG01053.1 [Gibberella zeae PH-1]	1	2667410	hypothetical protein		7.31952	6	0	0	0	0	0
FVEG_01184	hypothetical protein FG01052.1 [Gibberella zeae PH-1]	1	2669806	proliferating cell nuclear antigen		0	1	0	0	0	0	0
FVEG_01183	predicted protein [Nectria haematococca mpVI 77-13-4]_x0001_gb|EEU48499.1| predicted protein [Nectria haematococca mpVI 77-13-4]	1	2671677	hypothetical protein		15.9167	5	0	0	0	0	0
FVEG_01181	hypothetical protein FG01050.1 [Gibberella zeae PH-1]	1	2675606	hypothetical protein		18.0625	5	0	0	0	0	0
FVEG_01180	hypothetical protein FG01049.1 [Gibberella zeae PH-1]	1	2678656	hypothetical protein		-23.9402	2	0	0	0	0	0
FVEG_01179	hypothetical protein FG01048.1 [Gibberella zeae PH-1]	1	2700349	hypothetical protein		-42.3381	2	42.3381	4	2	0	0
FVEG_01178	-	1	2702710	hypothetical protein		5.01379	6	42.3381	4	2	0	0
FVEG_01177	-	1	2703953	hypothetical protein		7.73387	5	42.3381	4	2	0	0
FVEG_01176	-	1	2704858	hypothetical protein		-2.65489	4	42.3381	4	2	0	0
FVEG_01175	hypothetical protein FG01046.1 [Gibberella zeae PH-1]	1	2709488	hypothetical protein		0	1	0	0	0	0	0
FVEG_01174	-	1	2716984	hypothetical protein		3.41263	3	0	0	0	0	0
FVEG_01173	-	1	2725003	hypothetical protein		3.83555	3	0	0	0	0	0
FVEG_01172	hypothetical protein FG01044.1 [Gibberella zeae PH-1]	1	2727044	hypothetical protein		0	1	0	0	0	0	0
FVEG_01171	hypothetical protein FG01043.1 [Gibberella zeae PH-1]	1	2727986	hypothetical protein		20.6988	5	20.6988	3	5	0	0
FVEG_01170	hypothetical protein NECHADRAFT_74712 [Nectria haematococca mpVI 77-13-4]_x0001_gb|EEU48505.1| hypothetical protein NECHADRAFT_74712 [Nectria haematococca mpVI 77-13-4]	1	2730911	hypothetical protein		5.39631	1	20.6988	3	5	0	0
FVEG_01169	hypothetical protein FG01042.1 [Gibberella zeae PH-1]	1	2741659	hypothetical protein		0	1	20.6988	3	5	0	0
FVEG_01168	hypothetical protein FG01041.1 [Gibberella zeae PH-1]	1	2746043	hypothetical protein		4.43952	1	0	0	0	0	0
FVEG_01167	hypothetical protein FG01040.1 [Gibberella zeae PH-1]	1	2747876	hypothetical protein		4.53875	1	0	0	0	0	0
FVEG_01166	hypothetical protein NECHADRAFT_74716 [Nectria haematococca mpVI 77-13-4]_x0001_gb|EEU48507.1| hypothetical protein NECHADRAFT_74716 [Nectria haematococca mpVI 77-13-4]	1	2749927	hypothetical protein		0	1	0	0	0	0	0
FVEG_01165	hypothetical protein FG01038.1 [Gibberella zeae PH-1]	1	2752967	hypothetical protein		4.15875	1	0	0	0	0	0
FVEG_01164	hypothetical protein FG01037.1 [Gibberella zeae PH-1]	1	2754063	hypothetical protein		0	1	0	0	0	0	0
FVEG_01163	hypothetical protein NECHADRAFT_74719 [Nectria haematococca mpVI 77-13-4]_x0001_gb|EEU48509.1| hypothetical protein NECHADRAFT_74719 [Nectria haematococca mpVI 77-13-4]	1	2756010	hypothetical protein		-3.40484	4	0	0	0	0	0
FVEG_01162	hypothetical protein FG01035.1 [Gibberella zeae PH-1]	1	2758236	hypothetical protein		0	1	0	0	0	0	0
FVEG_01161	hypothetical protein BC1G_13407 [Botryotinia fuckeliana B05.10]_x0001_gb|EDN19226.1| hypothetical protein BC1G_13407 [Botryotinia fuckeliana B05.10]	1	2763486	hypothetical protein		3.45831	1	0	0	0	0	0
FVEG_01160	hypothetical protein FG01033.1 [Gibberella zeae PH-1]	1	2764500	hypothetical protein		3.83244	1	0	0	0	0	0
FVEG_01159	hypothetical protein FG01063.1 [Gibberella zeae PH-1]	1	2765833	thymidylate synthase		-3.77479	4	0	0	0	0	0
FVEG_01158	hypothetical protein FG01032.1 [Gibberella zeae PH-1]	1	2767871	amino acid transporter arg-13		0.627882	2	0	0	0	0	0
FVEG_01157	hypothetical protein FG01031.1 [Gibberella zeae PH-1]	1	2769476	hypothetical protein		-3.32954	4	0	0	0	0	0
FVEG_01156	hypothetical protein FG01030.1 [Gibberella zeae PH-1]	1	2771352	hypothetical protein		4.01265	3	0	0	0	0	0
FVEG_01155	hypothetical protein FG01029.1 [Gibberella zeae PH-1]	1	2775501	hypothetical protein		3.46444	1	0	0	0	0	0
FVEG_01154	putative chaperone [Gibberella fujikuroi]	1	2778394	hypothetical protein		4.22009	6	0	0	0	0	0
FVEG_01153	hypothetical protein NECHADRAFT_74815 [Nectria haematococca mpVI 77-13-4]_x0001_gb|EEU48555.1| hypothetical protein NECHADRAFT_74815 [Nectria haematococca mpVI 77-13-4]	1	2779923	ribulose-phosphate 3-epimerase		4.65454	6	0	0	0	0	0
FVEG_01152	hypothetical protein FG01027.1 [Gibberella zeae PH-1]	1	2781834	hypothetical protein		2.21752	2	0	0	0	0	0
FVEG_01151	hypothetical protein FG01026.1 [Gibberella zeae PH-1]	1	2785614	hypothetical protein		4.64671	6	0	0	0	0	0
FVEG_01150	hypothetical protein FG01025.1 [Gibberella zeae PH-1]	1	2787193	hypothetical protein		6.93139	6	0	0	0	0	0
FVEG_01149	hypothetical protein FG01024.1 [Gibberella zeae PH-1]_x0001_sp|Q4IP34.1|PRP5_GIBZE RecName: Full=Pre-mRNA-processing ATP-dependent RNA helicase PRP5	1	2788561	pre-mRNA-processing ATP-dependent RNA helicase prp-5		0	1	0	0	0	0	0
FVEG_01148	hypothetical protein FG01023.1 [Gibberella zeae PH-1]	1	2791613	hypothetical protein		5.97101	6	0	0	0	0	0
FVEG_01147	hypothetical protein FG01022.1 [Gibberella zeae PH-1]	1	2795477	hypothetical protein		2.09199	1	0	0	0	0	0
FVEG_01146	hypothetical protein FG01021.1 [Gibberella zeae PH-1]_x0001_sp|Q8L805.1|RL35_WHEAT RecName: Full=60S ribosomal protein L35_x0001_pdb|2GO5|5 Chain 5, Structure Of Signal Recognition Particle Receptor (Sr) In Complex With Signal Recognition Particle (Srp) And Ribosome Nascent Chain Complex_x0001_pdb|2J37|5 Chain 5, Model Of Mammalian Srp Bound To 80s Rncs_x0001_pdb|3IZ5|CC Chain c, Localization Of …	1	2798622	60S ribosomal protein L35		-4.18276	4	0	0	0	0	0
FVEG_01145	vesicle transport V-SNARE protein [Glomerella graminicola M1.001]	1	2799925	hypothetical protein		6.02152	6	0	0	0	0	0
FVEG_01144	hypothetical protein NECHADRAFT_74734 [Nectria haematococca mpVI 77-13-4]_x0001_gb|EEU48515.1| hypothetical protein NECHADRAFT_74734 [Nectria haematococca mpVI 77-13-4]	1	2800929	hypothetical protein		-10.3767	4	0	0	0	0	0
FVEG_01143	hypothetical protein NECHADRAFT_31439 [Nectria haematococca mpVI 77-13-4]_x0001_gb|EEU47798.1| hypothetical protein NECHADRAFT_31439 [Nectria haematococca mpVI 77-13-4]	1	2802340	hypothetical protein		-25.0576	4	25.0576	3	4	0	0
FVEG_01142	hypothetical protein FG01018.1 [Gibberella zeae PH-1]	1	2804517	hypothetical protein		7.20775	6	25.0576	3	4	0	0
FVEG_01141	hypothetical protein FG01017.1 [Gibberella zeae PH-1]	1	2810076	hypothetical protein		8.44869	5	25.0576	3	4	0	0
FVEG_01140	hypothetical protein FG01016.1 [Gibberella zeae PH-1]	1	2812959	hypothetical protein		-1.84274	4	0	0	0	0	0
FVEG_01139	hypothetical protein FG01015.1 [Gibberella zeae PH-1]	1	2814937	heat shock protein 78, mitochondrial precursor		4.39502	6	0	0	0	0	0
FVEG_01138	ARF_AJECA ADP-RIBOSYLATION FACTOR [Gibberella zeae PH-1]_x0001_ref|XP_003054231.1| predicted protein [Nectria haematococca mpVI 77-13-4]_x0001_gb|EEU48518.1| predicted protein [Nectria haematococca mpVI 77-13-4]	1	2817744	hypothetical protein		4.74461	6	0	0	0	0	0
FVEG_01137	hypothetical protein FG01013.1 [Gibberella zeae PH-1]	1	2820656	hypothetical protein		8.08668	5	0	0	0	0	0
FVEG_01136	hypothetical protein FG01012.1 [Gibberella zeae PH-1]	1	2822131	hypothetical protein		0	1	0	0	0	0	0
FVEG_01135	hypothetical protein FG01011.1 [Gibberella zeae PH-1]	1	2826321	hypothetical protein		-1.94501	4	0	0	0	0	0
FVEG_01134	hypothetical protein FG01010.1 [Gibberella zeae PH-1]	1	2827685	hypothetical protein		5.09306	6	0	0	0	0	0
FVEG_01133	hypothetical protein NECHADRAFT_98777 [Nectria haematococca mpVI 77-13-4]_x0001_gb|EEU48521.1| hypothetical protein NECHADRAFT_98777 [Nectria haematococca mpVI 77-13-4]	1	2829398	hypothetical protein		8.04013	5	0	0	0	0	0
FVEG_01132	hypothetical protein NECHADRAFT_102367 [Nectria haematococca mpVI 77-13-4]_x0001_gb|EEU47803.1| hypothetical protein NECHADRAFT_102367 [Nectria haematococca mpVI 77-13-4]	1	2831290	elongation factor 1-beta		0	1	0	0	0	0	0
FVEG_01131	hypothetical protein FG01007.1 [Gibberella zeae PH-1]_x0001_sp|Q4IP51.1|PSF1_GIBZE RecName: Full=DNA replication complex GINS protein PSF1	1	2832909	DNA replication complex GINS protein PSF1		6.84941	6	0	0	0	0	0
FVEG_01130	hypothetical protein FG01006.1 [Gibberella zeae PH-1]	1	2835024	hypothetical protein		0	1	0	0	0	0	0
FVEG_01129	-	1	2842864	hypothetical protein		7.13574	6	0	0	0	0	0
FVEG_01128	-	1	2845748	hypothetical protein		9.53653	6	0	0	0	0	0
FVEG_01127	kinesin [Gibberella moniliformis]	1	2846658	hypothetical protein		12.8154	6	12.8154	7	6	0	0
FVEG_01126	hypothetical protein FG01003.1 [Gibberella zeae PH-1]	1	2851440	hypothetical protein		9.49878	6	12.8154	7	6	0	0
FVEG_01125	hypothetical protein FG01002.1 [Gibberella zeae PH-1]	1	2853555	hypothetical protein		0	1	12.8154	7	6	0	0
FVEG_01124	hypothetical protein FG01001.1 [Gibberella zeae PH-1]	1	2857192	hypothetical protein		4.12032	6	12.8154	7	6	0	0
FVEG_01123	cytochrome P450 51B [Gibberella zeae]_x0001_gb|ACL93393.1| cytochrome P450 51B [Gibberella zeae]_x0001_gb|ACL93394.1| cytochrome P450 51B [Gibberella zeae]	1	2858637	cytochrome P450 51		4.74445	5	12.8154	7	6	0	0
FVEG_01122	hypothetical protein LOC100273573 [Zea mays]_x0001_gb|ACF86426.1| unknown [Zea mays]	1	2862583	hypothetical protein		4.82031	3	12.8154	7	6	0	0
FVEG_01121	hypothetical protein NECHADRAFT_102368 [Nectria haematococca mpVI 77-13-4]_x0001_gb|EEU48525.1| hypothetical protein NECHADRAFT_102368 [Nectria haematococca mpVI 77-13-4]	1	2866032	hypothetical protein		0	1	12.8154	7	6	0	0
FVEG_01120	hypothetical protein FG00998.1 [Gibberella zeae PH-1]	1	2868620	hypothetical protein		3.00725	5	0	0	0	0	0
FVEG_01119	hypothetical protein NECHADRAFT_73374 [Nectria haematococca mpVI 77-13-4]_x0001_gb|EEU47811.1| hypothetical protein NECHADRAFT_73374 [Nectria haematococca mpVI 77-13-4]	1	2869556	hypothetical protein		0	1	0	0	0	0	0
FVEG_01118	hypothetical protein FG00996.1 [Gibberella zeae PH-1]	1	2870366	hypothetical protein		3.03219	5	0	0	0	0	0
FVEG_01117	hypothetical protein FG00995.1 [Gibberella zeae PH-1]	1	2872616	hypothetical protein		0	1	0	0	0	0	0
FVEG_01116	hypothetical protein FG00993.1 [Gibberella zeae PH-1]	1	2876980	hypothetical protein		4.3338	5	0	0	0	0	0
FVEG_01115	hypothetical protein FG00992.1 [Gibberella zeae PH-1]	1	2878773	hypothetical protein		5.22664	5	0	0	0	0	0
FVEG_01114	hypothetical protein FG00991.1 [Gibberella zeae PH-1]	1	2879934	hypothetical protein		6.21551	6	0	0	0	0	0
FVEG_01113	hypothetical protein FG00990.1 [Gibberella zeae PH-1]	1	2885005	hypothetical protein		6.55655	6	0	0	0	0	0
FVEG_01112	hypothetical protein FG00989.1 [Gibberella zeae PH-1]	1	2886787	rhamnogalacturonase B precursor		0	1	0	0	0	0	0
FVEG_01111	hypothetical protein FG00987.1 [Gibberella zeae PH-1]	1	2891569	hypothetical protein		0	1	0	0	0	0	0
FVEG_01110	-	1	2893381	hypothetical protein		12.4835	5	0	0	0	0	0
FVEG_01109	hypothetical protein FG00986.1 [Gibberella zeae PH-1]	1	2894125	hypothetical protein		13.3245	6	0	0	0	0	0
FVEG_01108	hypothetical protein NECHADRAFT_98785 [Nectria haematococca mpVI 77-13-4]_x0001_gb|EEU47817.1| hypothetical protein NECHADRAFT_98785 [Nectria haematococca mpVI 77-13-4]	1	2898323	hypothetical protein		27.5305	5	0	0	0	0	0
FVEG_01107	hypothetical protein NECHADRAFT_98786 [Nectria haematococca mpVI 77-13-4]_x0001_gb|EEU47818.1| hypothetical protein NECHADRAFT_98786 [Nectria haematococca mpVI 77-13-4]	1	2902142	hypothetical protein		19.4601	6	0	0	0	0	0
FVEG_01106	hypothetical protein FG00983.1 [Gibberella zeae PH-1]	1	2902832	hypothetical protein		33.4297	5	0	0	0	0	0
FVEG_01105	hypothetical protein FG00982.1 [Gibberella zeae PH-1]	1	2911858	hypothetical protein		22.0572	6	0	0	0	0	0
FVEG_01104	hypothetical protein FG00981.1 [Gibberella zeae PH-1]	1	2914098	hypothetical protein		-0.458888	2	0	0	0	0	0
FVEG_01103	hypothetical protein NECHADRAFT_74774 [Nectria haematococca mpVI 77-13-4]_x0001_gb|EEU48533.1| hypothetical protein NECHADRAFT_74774 [Nectria haematococca mpVI 77-13-4]	1	2915415	hypothetical protein		-6.08673	4	0	0	0	0	0
FVEG_01102	-	1	2919183	hypothetical protein		48.2408	5	0	0	0	0	0
FVEG_01101	hypothetical protein NECHADRAFT_74775 [Nectria haematococca mpVI 77-13-4]_x0001_gb|EEU48534.1| hypothetical protein NECHADRAFT_74775 [Nectria haematococca mpVI 77-13-4]	1	2920126	hypothetical protein		25.7571	6	0	0	0	0	0
FVEG_01100	-	1	2923693	hypothetical protein		52.3173	5	0	0	0	0	0
FVEG_01099	hypothetical protein FG00974.1 [Gibberella zeae PH-1]	1	2927462	hypothetical protein		60.4911	5	0	0	0	0	0
FVEG_01098	hypothetical protein NECHADRAFT_32121 [Nectria haematococca mpVI 77-13-4]_x0001_gb|EEU48535.1| hypothetical protein NECHADRAFT_32121 [Nectria haematococca mpVI 77-13-4]	1	2931922	hypothetical protein		57.7362	5	0	0	0	0	0
FVEG_01097	hypothetical protein FG00976.1 [Gibberella zeae PH-1]	1	2937495	hypothetical protein		23.6285	6	0	0	0	0	0
FVEG_01096	-	1	2942380	hypothetical protein		31.6053	5	0	0	0	0	0
FVEG_01095	hypothetical protein FG00971.1 [Gibberella zeae PH-1]	1	2943243	hypothetical protein		31.8947	5	0	0	0	0	0
FVEG_01094	-	1	2945001	hypothetical protein		0	1	0	0	0	0	0
FVEG_01093	-	1	2945869	hypothetical protein		38.0102	5	0	0	0	0	0
FVEG_01092	hypothetical protein FG00970.1 [Gibberella zeae PH-1]	1	2946874	hypothetical protein		2.26203	2	0	0	0	0	0
FVEG_01091	hypothetical protein FG00969.1 [Gibberella zeae PH-1]	1	2947211	bifunctional purine biosynthesis protein ADE17		0	1	0	0	0	0	0
FVEG_01090	hypothetical protein NECHADRAFT_74781 [Nectria haematococca mpVI 77-13-4]_x0001_gb|EEU47823.1| hypothetical protein NECHADRAFT_74781 [Nectria haematococca mpVI 77-13-4]	1	2951104	hypothetical protein		9.58433	6	0	0	0	0	0
FVEG_01089	hypothetical protein FG00623.1 [Gibberella zeae PH-1]	1	2952044	hypothetical protein		0	1	0	0	0	0	0
FVEG_01088	predicted protein [Nectria haematococca mpVI 77-13-4]_x0001_gb|EEU48538.1| predicted protein [Nectria haematococca mpVI 77-13-4]	1	2953963	hypothetical protein		12.7615	6	0	0	0	0	0
FVEG_01087	hypothetical protein FG00621.1 [Gibberella zeae PH-1]	1	2955858	hypothetical protein		0	1	0	0	0	0	0
FVEG_01086	ammonium permease [Gibberella fujikuroi]	1	2958688	hypothetical protein		51.531	5	0	0	0	0	0
FVEG_01085	-	1	2963689	hypothetical protein		0	1	0	0	0	0	0
FVEG_01084	hypothetical protein FG00618.1 [Gibberella zeae PH-1]	1	2965341	hypothetical protein		79.2662	5	79.2662	20	5	0	0
FVEG_01083	hypothetical protein FG00617.1 [Gibberella zeae PH-1]	1	2972267	hypothetical protein		0	1	79.2662	20	5	0	0
FVEG_01082	-	1	2976427	hypothetical protein		34.0667	5	79.2662	20	5	0	0
FVEG_01081	hypothetical protein FG00616.1 [Gibberella zeae PH-1]	1	2980000	hypothetical protein		5.31718	3	79.2662	20	5	0	0
FVEG_01080	predicted protein [Hordeum vulgare subsp. vulgare]	1	2981785	hypothetical protein		36.7494	6	79.2662	20	5	0	0
FVEG_01079	hypothetical protein FG00615.1 [Gibberella zeae PH-1]	1	2984195	hypothetical protein		55.5741	5	79.2662	20	5	0	0
FVEG_01078	hypothetical protein FG00614.1 [Gibberella zeae PH-1]	1	2991486	hypothetical protein		0.383652	2	79.2662	20	5	0	0
FVEG_01077	hypothetical protein FG00613.1 [Gibberella zeae PH-1]	1	2994077	general amino-acid permease GAP1		16.9247	5	79.2662	20	5	0	0
FVEG_01076	hypothetical protein FG00612.1 [Gibberella zeae PH-1]	1	2998092	mannosyl-oligosaccharide 1,2-alpha-mannosidase		1.82245	2	79.2662	20	5	0	0
FVEG_01075	hypothetical protein NECHADRAFT_90073 [Nectria haematococca mpVI 77-13-4]_x0001_gb|EEU48546.1| hypothetical protein NECHADRAFT_90073 [Nectria haematococca mpVI 77-13-4]	1	3001866	hypothetical protein		10.072	6	79.2662	20	5	0	0
FVEG_01074	predicted protein [Nectria haematococca mpVI 77-13-4]_x0001_gb|EEU47826.1| predicted protein [Nectria haematococca mpVI 77-13-4]	1	3003131	hypothetical protein		0.82737	2	79.2662	20	5	0	0
FVEG_01073	hypothetical protein FG00609.1 [Gibberella zeae PH-1]	1	3004745	protein yabJ		11.9801	6	79.2662	20	5	0	0
FVEG_01072	hypothetical protein FG00608.1 [Gibberella zeae PH-1]	1	3006695	dolichyl-phosphate-mannose-protein mannosyltransferase 4		14.1559	6	79.2662	20	5	0	0
FVEG_01071	hypothetical protein FG00607.1 [Gibberella zeae PH-1]	1	3010096	hypothetical protein		0	1	79.2662	20	5	0	0
FVEG_01069	-	1	3011860	hypothetical protein		11.6799	6	79.2662	20	5	0	0
FVEG_01068	-	1	3013300	hypothetical protein		5.1217	5	79.2662	20	5	0	0
FVEG_01067	zinc finger transcription factor ACE1 [Gibberella zeae]	1	3017343	zinc finger transcription factor ace1		20.6154	6	79.2662	20	5	0	0
FVEG_01066	hypothetical protein FG00604.1 [Gibberella zeae PH-1]	1	3021300	hypothetical protein		0	1	79.2662	20	5	0	0
FVEG_01065	hypothetical protein FG00603.1 [Gibberella zeae PH-1]	1	3023865	hypothetical protein		18.4619	6	79.2662	20	5	0	0
FVEG_01064	hypothetical protein FG00602.1 [Gibberella zeae PH-1]	1	3027668	hypothetical protein		-15.9827	4	79.2662	20	5	0	0
FVEG_01063	hypothetical protein FG00601.1 [Gibberella zeae PH-1]	1	3029091	hypothetical protein		-22.5497	4	0	0	0	0	0
FVEG_01062	predicted protein [Nectria haematococca mpVI 77-13-4]_x0001_gb|EEU48549.1| predicted protein [Nectria haematococca mpVI 77-13-4]	1	3030784	hypothetical protein		18.6033	6	0	0	0	0	0
FVEG_01061	hypothetical protein FG00598.1 [Gibberella zeae PH-1]	1	3033523	hypothetical protein		0	1	0	0	0	0	0
FVEG_01060	predicted protein [Nectria haematococca mpVI 77-13-4]_x0001_gb|EEU47835.1| predicted protein [Nectria haematococca mpVI 77-13-4]	1	3037392	hypothetical protein		-25.0189	4	0	0	0	0	0
FVEG_01059	hypothetical protein FG00596.1 [Gibberella zeae PH-1]	1	3040989	L-asparaginase 2 precursor		0	1	0	0	0	0	0
FVEG_01058	hypothetical protein FG00595.1 [Gibberella zeae PH-1]	1	3044433	hypothetical protein		1.18606	2	0	0	0	0	0
FVEG_01057	hypothetical protein FG00594.1 [Gibberella zeae PH-1]	1	3048980	hypothetical protein		8.93379	6	0	0	0	0	0
FVEG_01056	hypothetical protein FG00593.1 [Gibberella zeae PH-1]	1	3050708	hypothetical protein		12.5293	3	0	0	0	0	0
FVEG_01055	hypothetical protein FG00592.1 [Gibberella zeae PH-1]	1	3054518	hypothetical protein		0	1	0	0	0	0	0
FVEG_01054	hypothetical protein FG00591.1 [Gibberella zeae PH-1]	1	3059233	hypothetical protein		7.38933	3	0	0	0	0	0
FVEG_01053	predicted protein [Nectria haematococca mpVI 77-13-4]_x0001_gb|EEU48554.1| predicted protein [Nectria haematococca mpVI 77-13-4]	1	3060843	hypothetical protein		1.67664	2	0	0	0	0	0
FVEG_01052	hypothetical protein FG00588.1 [Gibberella zeae PH-1]	1	3063489	hypothetical protein		19.0614	5	0	0	0	0	0
FVEG_01051	hypothetical protein FG00587.1 [Gibberella zeae PH-1]_x0001_sp|Q4IQC1.1|PPME1_GIBZE RecName: Full=Protein phosphatase methylesterase 1; Short=PME-1	1	3065642	protein phosphatase methylesterase 1		25.1141	5	0	0	0	0	0
FVEG_01050	hypothetical protein FG00586.1 [Gibberella zeae PH-1]	1	3073658	hypothetical protein		0	1	0	0	0	0	0
FVEG_01049	hypothetical protein NECHADRAFT_73376 [Nectria haematococca mpVI 77-13-4]_x0001_gb|EEU48558.1| hypothetical protein NECHADRAFT_73376 [Nectria haematococca mpVI 77-13-4]	1	3076822	hypothetical protein		27.3499	3	27.3499	5	3	0	0
FVEG_01048	hypothetical protein FG00565.1 [Gibberella zeae PH-1]	1	3079762	hypothetical protein		0	1	27.3499	5	3	0	0
FVEG_01047	-	1	3090818	hypothetical protein		23.8854	3	27.3499	5	3	0	0
FVEG_01046	hypothetical protein FG00566.1 [Gibberella zeae PH-1]	1	3094477	hypothetical protein		0	1	27.3499	5	3	0	0
FVEG_01045	hypothetical protein FG00567.1 [Gibberella zeae PH-1]	1	3096506	hypothetical protein		0	1	27.3499	5	3	0	0
FVEG_01044	hypothetical protein FG11137.1 [Gibberella zeae PH-1]	1	3105110	hypothetical protein		0	1	0	0	0	0	0
FVEG_01043	hypothetical protein FG11138.1 [Gibberella zeae PH-1]	1	3106171	hypothetical protein		-5.6219	5	0	0	0	0	0
FVEG_01042	hypothetical protein FG11139.1 [Gibberella zeae PH-1]	1	3108489	hypothetical protein		-6.09944	5	0	0	0	0	0
FVEG_01041	hypothetical protein FG11140.1 [Gibberella zeae PH-1]	1	3110704	hypothetical protein		-4.67033	5	0	0	0	0	0
FVEG_01040	hypothetical protein FG00568.1 [Gibberella zeae PH-1]	1	3112677	hypothetical protein		0	1	0	0	0	0	0
FVEG_01039	-	1	3114062	hypothetical protein		4.22046	6	0	0	0	0	0
FVEG_01038	hypothetical protein FG00570.1 [Gibberella zeae PH-1]	1	3114904	hypothetical protein		0	1	0	0	0	0	0
FVEG_01037	RecName: Full=Putative exoglucanase type C; AltName: Full=1,4-beta-cellobiohydrolase; AltName: Full=Beta-glucancellobiohydrolase; AltName: Full=Exocellobiohydrolase I; Flags: Precursor_x0001_gb|AAA65587.1| C-family cellulase homologue 2 [Fusarium oxysporum]	1	3119893	exoglucanase 1 precursor		-2.83974	4	0	0	0	0	0
FVEG_01036	hypothetical protein FG00572.1 [Gibberella zeae PH-1]	1	3122401	hypothetical protein		-5.1798	5	0	0	0	0	0
FVEG_01035	hypothetical protein FG00573.1 [Gibberella zeae PH-1]	1	3126990	hypothetical protein		-8.268	5	0	0	0	0	0
FVEG_01034	hypothetical protein FG00574.1 [Gibberella zeae PH-1]	1	3132360	hypothetical protein		-15.8124	5	15.8124	7	5	0	0
FVEG_01033	hypothetical protein FG00575.1 [Gibberella zeae PH-1]	1	3135413	hypothetical protein		0	1	15.8124	7	5	0	0
FVEG_01032	hypothetical protein FG00575.1 [Gibberella zeae PH-1]	1	3138690	hypothetical protein		-6.07838	2	15.8124	7	5	0	0
FVEG_01031	hypothetical protein FG00576.1 [Gibberella zeae PH-1]	1	3141832	hypothetical protein		0	1	15.8124	7	5	0	0
FVEG_01030	hypothetical protein FG00577.1 [Gibberella zeae PH-1]	1	3144893	hypothetical protein		4.26313	6	15.8124	7	5	0	0
FVEG_01029	hypothetical protein FG00578.1 [Gibberella zeae PH-1]	1	3146290	general stress protein 39		4.50854	6	15.8124	7	5	0	0
FVEG_01028	hypothetical protein NECHADRAFT_74824 [Nectria haematococca mpVI 77-13-4]_x0001_gb|EEU47843.1| hypothetical protein NECHADRAFT_74824 [Nectria haematococca mpVI 77-13-4]	1	3149565	hypothetical protein		5.18032	3	15.8124	7	5	0	0
FVEG_01027	hypothetical protein FG00581.1 [Gibberella zeae PH-1]	1	3150968	hypothetical protein		1.26189	2	0	0	0	0	0
FVEG_01026	-	1	3154521	hypothetical protein		17.4713	5	0	0	0	0	0
FVEG_01025	hypothetical protein FG00583.1 [Gibberella zeae PH-1]	1	3155956	hypothetical protein		11.1746	6	0	0	0	0	0
FVEG_01024	hypothetical protein FG00584.1 [Gibberella zeae PH-1]	1	3161508	hypothetical protein		17.2695	5	0	0	0	0	0
FVEG_01023	hypothetical protein NECHADRAFT_90099 [Nectria haematococca mpVI 77-13-4]_x0001_gb|EEU47850.1| hypothetical protein NECHADRAFT_90099 [Nectria haematococca mpVI 77-13-4]	1	3168635	hypothetical protein		0	1	0	0	0	0	0
FVEG_01022	predicted protein [Nectria haematococca mpVI 77-13-4]_x0001_gb|EEU48568.1| predicted protein [Nectria haematococca mpVI 77-13-4]	1	3171188	proteasome component C1		4.59407	6	0	0	0	0	0
FVEG_01021	hypothetical protein FG00563.1 [Gibberella zeae PH-1]	1	3174378	hypothetical protein		16.0987	5	0	0	0	0	0
FVEG_01020	hypothetical protein FG00562.1 [Gibberella zeae PH-1]	1	3176126	hypothetical protein		3.25504	1	0	0	0	0	0
FVEG_01019	hypothetical protein FG00561.1 [Gibberella zeae PH-1]	1	3178238	cytochrome c1, mitochondrial precursor		17.9034	5	0	0	0	0	0
FVEG_01018	hypothetical protein FG00560.1 [Gibberella zeae PH-1]	1	3180495	hypothetical protein		4.84067	6	0	0	0	0	0
FVEG_01017	hypothetical protein FG00559.1 [Gibberella zeae PH-1]	1	3181738	26S protease regulatory subunit 7		31.147	5	0	0	0	0	0
FVEG_01016	hypothetical protein FG00558.1 [Gibberella zeae PH-1]	1	3183703	hypothetical protein		0	1	0	0	0	0	0
FVEG_01015	hypothetical protein NECHADRAFT_74846 [Nectria haematococca mpVI 77-13-4]_x0001_gb|EEU47855.1| hypothetical protein NECHADRAFT_74846 [Nectria haematococca mpVI 77-13-4]	1	3185936	hypothetical protein		29.6599	5	0	0	0	0	0
FVEG_01014	hypothetical protein FG00556.1 [Gibberella zeae PH-1]	1	3186792	hypothetical protein		31.5173	5	0	0	0	0	0
FVEG_01013	hypothetical protein FG00555.1 [Gibberella zeae PH-1]	1	3187953	hypothetical protein		7.06168	6	0	0	0	0	0
FVEG_01012	hypothetical protein FG00554.1 [Gibberella zeae PH-1]	1	3190308	hypothetical protein		9.96955	6	0	0	0	0	0
FVEG_01011	hypothetical protein FG00553.1 [Gibberella zeae PH-1]	1	3192161	hypothetical protein		32.8199	5	0	0	0	0	0
FVEG_01010	hypothetical protein FG00552.1 [Gibberella zeae PH-1]	1	3197623	hypothetical protein		16.1678	3	0	0	0	0	0
FVEG_01009	hypothetical protein FG00551.1 [Gibberella zeae PH-1]	1	3201887	hypothetical protein		0	1	0	0	0	0	0
FVEG_01008	hypothetical protein FG00550.1 [Gibberella zeae PH-1]	1	3208315	hypothetical protein		0	1	0	0	0	0	0
FVEG_01007	hypothetical protein FG00549.1 [Gibberella zeae PH-1]	1	3214393	hypothetical protein		7.00725	5	0	0	0	0	0
FVEG_01006	hypothetical protein FG00548.1 [Gibberella zeae PH-1]	1	3216462	hypothetical protein		9.72011	6	0	0	0	0	0
FVEG_01005	hypothetical protein FG00547.1 [Gibberella zeae PH-1]	1	3220989	hypothetical protein		9.77508	6	0	0	0	0	0
FVEG_01004	hypothetical protein FG00546.1 [Gibberella zeae PH-1]	1	3227142	hypothetical protein		3.125	3	0	0	0	0	0
FVEG_01003	hypothetical protein FG00545.1 [Gibberella zeae PH-1]	1	3233737	hypothetical protein		0	1	0	0	0	0	0
FVEG_01002	hypothetical protein FG00544.1 [Gibberella zeae PH-1]	1	3236737	hypothetical protein		-4.57205	4	0	0	0	0	0
FVEG_01001	hypothetical protein FG00543.1 [Gibberella zeae PH-1]	1	3238889	hypothetical protein		-4.72073	2	0	0	0	0	0
FVEG_01000	predicted protein [Nectria haematococca mpVI 77-13-4]_x0001_gb|EEU48576.1| predicted protein [Nectria haematococca mpVI 77-13-4]	1	3241612	hypothetical protein		-32.1972	5	0	0	0	0	0
FVEG_00999	hypothetical protein FG00542.1 [Gibberella zeae PH-1]	1	3242776	hypothetical protein		-35.5428	2	35.5428	4	2	0	0
FVEG_00998	hypothetical protein FG00541.1 [Gibberella zeae PH-1]	1	3243820	hypothetical protein		-28.6025	5	35.5428	4	2	0	0
FVEG_00997	hypothetical protein FG00540.1 [Gibberella zeae PH-1]	1	3249868	hypothetical protein		-20.6506	5	35.5428	4	2	0	0
FVEG_00996	hypothetical protein FG00539.1 [Gibberella zeae PH-1]	1	3252163	siderophore iron transporter mirB		0	1	35.5428	4	2	0	0
FVEG_00995	hypothetical protein FG00538.1 [Gibberella zeae PH-1]	1	3255515	hypothetical protein		-7.7034	5	0	0	0	0	0
FVEG_00994	hypothetical protein NECHADRAFT_90114 [Nectria haematococca mpVI 77-13-4]_x0001_gb|EEU48579.1| hypothetical protein NECHADRAFT_90114 [Nectria haematococca mpVI 77-13-4]	1	3257757	hypothetical protein		2.54681	6	0	0	0	0	0
FVEG_00993	hypothetical protein FG00536.1 [Gibberella zeae PH-1]	1	3260878	hypothetical protein		-5.42269	5	0	0	0	0	0
FVEG_00992	hypothetical protein NECHADRAFT_74867 [Nectria haematococca mpVI 77-13-4]_x0001_gb|EEU47867.1| hypothetical protein NECHADRAFT_74867 [Nectria haematococca mpVI 77-13-4]	1	3263990	hypothetical protein		0	1	0	0	0	0	0
FVEG_00991	hypothetical protein FG00534.1 [Gibberella zeae PH-1]	1	3265633	hypothetical protein		-7.2538	5	0	0	0	0	0
FVEG_00989	hypothetical protein FG00532.1 [Gibberella zeae PH-1]	1	3272013	hypothetical protein		4.18243	6	0	0	0	0	0
FVEG_00988	predicted protein [Nectria haematococca mpVI 77-13-4]_x0001_gb|EEU47869.1| predicted protein [Nectria haematococca mpVI 77-13-4]	1	3278759	hypothetical protein		0	1	0	0	0	0	0
FVEG_00987	hypothetical protein FG00530.1 [Gibberella zeae PH-1]	1	3282516	hypothetical protein		4.6359	6	0	0	0	0	0
FVEG_00986	ammonium permease MepC [Gibberella fujikuroi]	1	3285093	ammonium transporter MEP3		3.34468	3	0	0	0	0	0
FVEG_00985	-	1	3289876	hypothetical protein		-15.2457	5	0	0	0	0	0
FVEG_00984	hypothetical protein FG00528.1 [Gibberella zeae PH-1]	1	3291332	hypothetical protein		6.95877	6	0	0	0	0	0
FVEG_00983	-	1	3292809	hypothetical protein		0	1	0	0	0	0	0
FVEG_00982	hypothetical protein NECHADRAFT_90120 [Nectria haematococca mpVI 77-13-4]_x0001_gb|EEU48583.1| hypothetical protein NECHADRAFT_90120 [Nectria haematococca mpVI 77-13-4]	1	3294496	hypothetical protein		-7.58529	4	0	0	0	0	0
FVEG_00981	hypothetical protein NECHADRAFT_74875 [Nectria haematococca mpVI 77-13-4]_x0001_gb|EEU48584.1| hypothetical protein NECHADRAFT_74875 [Nectria haematococca mpVI 77-13-4]	1	3296839	hypothetical protein		13.0378	6	0	0	0	0	0
FVEG_00980	hypothetical protein FG00526.1 [Gibberella zeae PH-1]	1	3307067	hypothetical protein		20.7515	5	0	0	0	0	0
FVEG_00979	hypothetical protein FG00525.1 [Gibberella zeae PH-1]	1	3308360	hypothetical protein		10.7867	6	0	0	0	0	0
FVEG_00978	hypothetical protein FG00524.1 [Gibberella zeae PH-1]	1	3311892	UTP-glucose-1-phosphate uridylyltransferase		10.8782	5	0	0	0	0	0
FVEG_00977	extracellular matrix protein precursor [Fusarium oxysporum f. sp. lycopersici]	1	3318464	hypothetical protein		11.119	5	0	0	0	0	0
FVEG_00976	hypothetical protein FG00522.1 [Gibberella zeae PH-1]	1	3320975	hypothetical protein		7.04354	6	0	0	0	0	0
FVEG_00975	hypothetical protein FG00520.1 [Gibberella zeae PH-1]	1	3323134	hypothetical protein		12.9875	3	0	0	0	0	0
FVEG_00974	hypothetical protein LOC100274501 [Zea mays]_x0001_gb|ACF88208.1| unknown [Zea mays]	1	3325635	hypothetical protein		14.3092	5	0	0	0	0	0
FVEG_00973	hypothetical protein FG00518.1 [Gibberella zeae PH-1]	1	3328876	hypothetical protein		0	1	0	0	0	0	0
FVEG_00972	hypothetical protein FG00517.1 [Gibberella zeae PH-1]	1	3329947	hypothetical protein		4.27752	2	0	0	0	0	0
FVEG_00971	predicted protein [Nectria haematococca mpVI 77-13-4]_x0001_gb|EEU47875.1| predicted protein [Nectria haematococca mpVI 77-13-4]	1	3339023	hypothetical protein		0	1	0	0	0	0	0
FVEG_00970	hypothetical protein NECHADRAFT_98819 [Nectria haematococca mpVI 77-13-4]_x0001_gb|EEU48591.1| hypothetical protein NECHADRAFT_98819 [Nectria haematococca mpVI 77-13-4]	1	3343109	hypothetical protein		18.0465	3	0	0	0	0	0
FVEG_00969	hypothetical protein FG00512.1 [Gibberella zeae PH-1]	1	3346062	hypothetical protein		24.6682	3	0	0	0	0	0
FVEG_00968	hypothetical protein FG00511.1 [Gibberella zeae PH-1]	1	3348188	hypothetical protein		29.419	3	0	0	0	0	0
FVEG_00967	hypothetical protein FG00510.1 [Gibberella zeae PH-1]	1	3349394	hypothetical protein		46.3541	5	0	0	0	0	0
FVEG_00966	hypothetical protein FG00509.1 [Gibberella zeae PH-1]	1	3350551	hypothetical protein		46.6458	5	46.6458	10	5	0	0
FVEG_00965	hypothetical protein FG00508.1 [Gibberella zeae PH-1]	1	3353773	hypothetical protein		44.4346	5	46.6458	10	5	0	0
FVEG_00964	hypothetical protein FG00507.1 [Gibberella zeae PH-1]	1	3357905	hypothetical protein		39.1238	5	46.6458	10	5	0	0
FVEG_00963	hypothetical protein FG00506.1 [Gibberella zeae PH-1]	1	3361062	hypothetical protein		33.2767	5	46.6458	10	5	0	0
FVEG_00962	hypothetical protein FG00505.1 [Gibberella zeae PH-1]	1	3362349	hypothetical protein		34.4796	5	46.6458	10	5	0	0
FVEG_00961	hypothetical protein FG00504.1 [Gibberella zeae PH-1]	1	3363648	DNA replication licensing factor mcm4		0	1	46.6458	10	5	0	0
FVEG_00960	hypothetical protein FG00503.1 [Gibberella zeae PH-1]	1	3366915	hypothetical protein		7.31098	3	46.6458	10	5	0	0
FVEG_00959	predicted protein [Nectria haematococca mpVI 77-13-4]_x0001_gb|EEU48597.1| predicted protein [Nectria haematococca mpVI 77-13-4]	1	3369412	vacuolar transporter chaperone 4		1.40356	2	46.6458	10	5	0	0
FVEG_00958	hypothetical protein FG00501.1 [Gibberella zeae PH-1]_x0001_sp|Q4IQK7.1|RMT2_GIBZE RecName: Full=Arginine N-methyltransferase 2	1	3373714	arginine N-methyltransferase 2		3.1574	6	46.6458	10	5	0	0
FVEG_00957	putative hexokinase HXK1 [Gibberella moniliformis]	1	3374965	hexokinase-1		4.03379	1	46.6458	10	5	0	0
FVEG_00956	hypothetical protein FG00499.1 [Gibberella zeae PH-1]	1	3379049	hypothetical protein		-9.95034	5	9.95034	3	5	0	0
FVEG_00955	-	1	3381529	hypothetical protein		0	1	9.95034	3	5	0	0
FVEG_00954	hypothetical protein FG00497.1 [Gibberella zeae PH-1]	1	3382511	hypothetical protein		6.0464	1	9.95034	3	5	0	0
FVEG_00953	predicted protein [Nectria haematococca mpVI 77-13-4]_x0001_gb|EEU47885.1| predicted protein [Nectria haematococca mpVI 77-13-4]	1	3385013	inorganic pyrophosphatase		-1.54109	5	0	0	0	0	0
FVEG_00952	hypothetical protein NECHADRAFT_74904 [Nectria haematococca mpVI 77-13-4]_x0001_gb|EEU47886.1| hypothetical protein NECHADRAFT_74904 [Nectria haematococca mpVI 77-13-4]	1	3387577	hypothetical protein		6.47601	1	0	0	0	0	0
FVEG_00951	hypothetical protein FG00493.1 [Gibberella zeae PH-1]	1	3387968	hypothetical protein		4.01194	6	0	0	0	0	0
FVEG_00950	-	1	3393702	hypothetical protein		8.58844	6	0	0	0	0	0
FVEG_00949	hypothetical protein FG00491.1 [Gibberella zeae PH-1]	1	3396148	hypothetical protein		-8.57657	4	0	0	0	0	0
FVEG_00948	hypothetical protein FG00490.1 [Gibberella zeae PH-1]	1	3399050	methylmalonate-semialdehyde dehydrogenase, mitochondrial precursor		2.8476	2	0	0	0	0	0
FVEG_00947	hypothetical protein FG00489.1 [Gibberella zeae PH-1]	1	3401359	hypothetical protein		5.19564	3	0	0	0	0	0
FVEG_00946	hypothetical protein FG00488.1 [Gibberella zeae PH-1]	1	3407022	hypothetical protein		0	1	0	0	0	0	0
FVEG_00945	hypothetical protein FG00487.1 [Gibberella zeae PH-1]	1	3409176	hypothetical protein		12.6715	1	0	0	0	0	0
FVEG_00944	hypothetical protein FG00486.1 [Gibberella zeae PH-1]	1	3411053	hypothetical protein		14.0594	1	0	0	0	0	0
FVEG_00943	hypothetical protein FG00485.1 [Gibberella zeae PH-1]	1	3414089	hypothetical protein		3.03559	6	0	0	0	0	0
FVEG_00942	-	1	3417060	hypothetical protein		10.1382	1	0	0	0	0	0
FVEG_00941	hypothetical protein FG00483.1 [Gibberella zeae PH-1]	1	3421698	hypothetical protein		15.0568	1	0	0	0	0	0
FVEG_00940	hypothetical protein NECHADRAFT_90144 [Nectria haematococca mpVI 77-13-4]_x0001_gb|EEU48604.1| hypothetical protein NECHADRAFT_90144 [Nectria haematococca mpVI 77-13-4]	1	3425463	hypothetical protein		40.4747	1	0	0	0	0	0
FVEG_00939	hypothetical protein NECHADRAFT_74917 [Nectria haematococca mpVI 77-13-4]_x0001_gb|EEU48605.1| hypothetical protein NECHADRAFT_74917 [Nectria haematococca mpVI 77-13-4]	1	3426887	hypothetical protein		0	1	0	0	0	0	0
FVEG_00938	hypothetical protein NECHADRAFT_102377 [Nectria haematococca mpVI 77-13-4]_x0001_gb|EEU48606.1| hypothetical protein NECHADRAFT_102377 [Nectria haematococca mpVI 77-13-4]	1	3428112	hypothetical protein		14.4964	1	0	0	0	0	0
FVEG_00937	hypothetical protein FG00480.1 [Gibberella zeae PH-1]	1	3429238	hypothetical protein		58.4437	1	58.4437	3	1	0	0
FVEG_00936	hypothetical protein FG00478.1 [Gibberella zeae PH-1]	1	3433092	phospho-2-dehydro-3-deoxyheptonate aldolase		-3.07329	4	58.4437	3	1	0	0
FVEG_00935	predicted protein [Nectria haematococca mpVI 77-13-4]_x0001_gb|EEU47894.1| predicted protein [Nectria haematococca mpVI 77-13-4]	1	3434991	hypothetical protein		0	1	58.4437	3	1	0	0
FVEG_00934	hypothetical protein FG00476.1 [Gibberella zeae PH-1]	1	3436559	hypothetical protein		3.94813	3	0	0	0	0	0
FVEG_00933	hypothetical protein FG00475.1 [Gibberella zeae PH-1]	1	3438025	hypothetical protein		4.88491	3	0	0	0	0	0
FVEG_00932	hypothetical protein FG00474.1 [Gibberella zeae PH-1]	1	3439902	hypothetical protein		4.56885	3	0	0	0	0	0
FVEG_00931	hypothetical protein FG00472.1 [Gibberella zeae PH-1]	1	3447411	hypothetical protein		-1.81246	5	0	0	0	0	0
FVEG_00930	hypothetical protein FG00471.1 [Gibberella zeae PH-1]	1	3450894	hypothetical protein		3.70647	3	0	0	0	0	0
FVEG_00929	hypothetical protein FG00470.1 [Gibberella zeae PH-1]	1	3452472	hypothetical protein		-2.09139	5	0	0	0	0	0
FVEG_00928	hypothetical protein FG00469.1 [Gibberella zeae PH-1]	1	3456372	serine/threonine-protein kinase psk1		3.49461	6	0	0	0	0	0
FVEG_00927	hypothetical protein FG00468.1 [Gibberella zeae PH-1]	1	3459913	hypothetical protein		4.07773	6	0	0	0	0	0
FVEG_00926	hypothetical protein FG00467.1 [Gibberella zeae PH-1]	1	3462164	hypothetical protein		0	1	0	0	0	0	0
FVEG_00925	hypothetical protein FG00466.1 [Gibberella zeae PH-1]	1	3465858	hypothetical protein		-5.33488	5	0	0	0	0	0
FVEG_00924	hypothetical protein FG00465.1 [Gibberella zeae PH-1]	1	3466528	hypothetical protein		5.74736	3	0	0	0	0	0
FVEG_00923	hypothetical protein FG00464.1 [Gibberella zeae PH-1]	1	3469653	hypothetical protein		0	1	0	0	0	0	0
FVEG_00922	hypothetical protein FG00463.1 [Gibberella zeae PH-1]	1	3475107	hypothetical protein		-21.671	5	0	0	0	0	0
FVEG_00921	hypothetical protein FG00462.1 [Gibberella zeae PH-1]	1	3477177	hypothetical protein		-27.4122	5	0	0	0	0	0
FVEG_00920	hypothetical protein FG00461.1 [Gibberella zeae PH-1]	1	3478347	hypothetical protein		-1.31191	4	0	0	0	0	0
FVEG_00919	hypothetical protein NECHADRAFT_103157 [Nectria haematococca mpVI 77-13-4]_x0001_gb|EEU47902.1| hypothetical protein NECHADRAFT_103157 [Nectria haematococca mpVI 77-13-4]	1	3482537	hypothetical protein		-72.593	5	0	0	0	0	0
FVEG_00918	hypothetical protein FG00459.1 [Gibberella zeae PH-1]	1	3484782	hypothetical protein		3.2674	2	0	0	0	0	0
FVEG_00917	LSM domain-containing protein [Glomerella graminicola M1.001]	1	3486894	hypothetical protein		-86.0262	5	86.0262	4	5	0	0
FVEG_00916	hypothetical protein NECHADRAFT_98833 [Nectria haematococca mpVI 77-13-4]_x0001_gb|EEU48615.1| hypothetical protein NECHADRAFT_98833 [Nectria haematococca mpVI 77-13-4]	1	3487402	hypothetical protein		-4.27667	3	86.0262	4	5	0	0
FVEG_00915	hypothetical protein FG00456.1 [Gibberella zeae PH-1]	1	3488740	hypothetical protein		0	1	86.0262	4	5	0	0
FVEG_00914	hypothetical protein FG00455.1 [Gibberella zeae PH-1]	1	3492644	hypothetical protein		0	1	86.0262	4	5	0	0
FVEG_00913	hypothetical protein FG00454.1 [Gibberella zeae PH-1]	1	3494472	hypothetical protein		2.8681	6	0	0	0	0	0
FVEG_00912	hypothetical protein FG00453.1 [Gibberella zeae PH-1]	1	3496614	hypothetical protein		2.65397	5	0	0	0	0	0
FVEG_00911	carbohydrate esterase family 4 [Nectria haematococca mpVI 77-13-4]_x0001_gb|EEU47905.1| carbohydrate esterase family 4 [Nectria haematococca mpVI 77-13-4]	1	3498821	hypothetical protein		9.30035	3	0	0	0	0	0
FVEG_00910	hypothetical protein FG00451.1 [Gibberella zeae PH-1]	1	3499997	hypothetical protein		5.1117	6	0	0	0	0	0
FVEG_00909	hypothetical protein FG00450.1 [Gibberella zeae PH-1]	1	3502075	hypothetical protein		13.8182	3	13.8182	3	3	0	0
FVEG_00908	hypothetical protein FG00449.1 [Gibberella zeae PH-1]	1	3506898	hypothetical protein		0	1	13.8182	3	3	0	0
FVEG_00907	hypothetical protein FG00448.1 [Gibberella zeae PH-1]	1	3509124	pre-mRNA-splicing factor ATP-dependent RNA helicase prp16		-4.37608	4	13.8182	3	3	0	0
FVEG_00906	hypothetical protein FG00446.1 [Gibberella zeae PH-1]	1	3513243	hypothetical protein		-4.43378	4	4.43378	3	4	0	0
FVEG_00905	hypothetical protein FG00445.1 [Gibberella zeae PH-1]	1	3516099	hypothetical protein		2.81268	3	4.43378	3	4	0	0
FVEG_00904	hypothetical protein FG00444.1 [Gibberella zeae PH-1]	1	3521460	hypothetical protein		3.89238	5	4.43378	3	4	0	0
FVEG_00903	hypothetical protein FG00443.1 [Gibberella zeae PH-1]	1	3524482	hypothetical protein		2.16117	6	0	0	0	0	0
FVEG_00902	hypothetical protein NECHADRAFT_74951 [Nectria haematococca mpVI 77-13-4]_x0001_gb|EEU48622.1| hypothetical protein NECHADRAFT_74951 [Nectria haematococca mpVI 77-13-4]	1	3525624	hypothetical protein		5.21176	5	0	0	0	0	0
FVEG_00901	hypothetical protein FG00441.1 [Gibberella zeae PH-1]	1	3528811	hypothetical protein		3.45009	3	0	0	0	0	0
FVEG_00900	hypothetical protein FG00440.1 [Gibberella zeae PH-1]	1	3532111	hypothetical protein		4.49635	3	0	0	0	0	0
FVEG_00899	hypothetical protein NECHADRAFT_74953 [Nectria haematococca mpVI 77-13-4]_x0001_gb|EEU47908.1| hypothetical protein NECHADRAFT_74953 [Nectria haematococca mpVI 77-13-4]	1	3533638	hypothetical protein		4.62083	5	0	0	0	0	0
FVEG_00898	hypothetical protein FG00438.1 [Gibberella zeae PH-1]	1	3535164	hypothetical protein		5.41765	5	0	0	0	0	0
FVEG_00897	hypothetical protein FG00437.1 [Gibberella zeae PH-1]	1	3539170	hypothetical protein		6.84025	3	6.84025	9	3	0	0
FVEG_00896	hypothetical protein FG00436.1 [Gibberella zeae PH-1]	1	3543710	hypothetical protein		-2.05091	4	6.84025	9	3	0	0
FVEG_00895	hypothetical protein FG00435.1 [Gibberella zeae PH-1]	1	3545140	hypothetical protein		6.02632	6	6.84025	9	3	0	0
FVEG_00894	hypothetical protein FG00434.1 [Gibberella zeae PH-1]	1	3552408	hypothetical protein		6.36073	5	6.84025	9	3	0	0
FVEG_00893	hypothetical protein FG00433.1 [Gibberella zeae PH-1]	1	3557919	hypothetical protein		2.62146	2	6.84025	9	3	0	0
FVEG_00892	hypothetical protein FG00431.1 [Gibberella zeae PH-1]	1	3563225	hypothetical protein		2.59819	3	6.84025	9	3	0	0
FVEG_00891	glycosyltransferase family 66 [Nectria haematococca mpVI 77-13-4]_x0001_gb|EEU48629.1| glycosyltransferase family 66 [Nectria haematococca mpVI 77-13-4]	1	3567096	hypothetical protein		0	1	6.84025	9	3	0	0
FVEG_00890	hypothetical protein FG00429.1 [Gibberella zeae PH-1]	1	3570277	hypothetical protein		2.50516	2	6.84025	9	3	0	0
FVEG_00889	predicted protein [Nectria haematococca mpVI 77-13-4]_x0001_gb|EEU47911.1| predicted protein [Nectria haematococca mpVI 77-13-4]	1	3571839	hypothetical protein		0	1	6.84025	9	3	0	0
FVEG_00888	hypothetical protein FG00427.1 [Gibberella zeae PH-1]	1	3574591	hypothetical protein		1.09654	3	0	0	0	0	0
FVEG_00887	-	1	3576225	hypothetical protein		1.45005	1	0	0	0	0	0
FVEG_00886	predicted protein [Nectria haematococca mpVI 77-13-4]_x0001_gb|EEU48632.1| predicted protein [Nectria haematococca mpVI 77-13-4]	1	3577517	hypothetical protein		0.861917	5	0	0	0	0	0
FVEG_00885	hypothetical protein NECHADRAFT_98843 [Nectria haematococca mpVI 77-13-4]_x0001_gb|EEU48634.1| hypothetical protein NECHADRAFT_98843 [Nectria haematococca mpVI 77-13-4]	1	3580295	hypothetical protein		1.00622	5	0	0	0	0	0
FVEG_00884	hypothetical protein NECHADRAFT_57455 [Nectria haematococca mpVI 77-13-4]_x0001_gb|EEU48635.1| hypothetical protein NECHADRAFT_57455 [Nectria haematococca mpVI 77-13-4]	1	3583546	hypothetical protein		0	1	0	0	0	0	0
FVEG_00883	hypothetical protein NECHADRAFT_74969 [Nectria haematococca mpVI 77-13-4]_x0001_gb|EEU48636.1| hypothetical protein NECHADRAFT_74969 [Nectria haematococca mpVI 77-13-4]	1	3586530	hypothetical protein		0	1	0	0	0	0	0
FVEG_00882	predicted protein [Nectria haematococca mpVI 77-13-4]_x0001_gb|EEU48637.1| predicted protein [Nectria haematococca mpVI 77-13-4]	1	3592033	S-adenosylmethionine synthetase 2		10.0381	2	0	0	0	0	0
FVEG_00881	predicted protein [Nectria haematococca mpVI 77-13-4]_x0001_gb|EEU47913.1| predicted protein [Nectria haematococca mpVI 77-13-4]	1	3596266	hypothetical protein		10.7754	3	0	0	0	0	0
FVEG_00880	hypothetical protein NECHADRAFT_74972 [Nectria haematococca mpVI 77-13-4]_x0001_gb|EEU48638.1| hypothetical protein NECHADRAFT_74972 [Nectria haematococca mpVI 77-13-4]	1	3597732	hypothetical protein		-0.8681	4	0	0	0	0	0
FVEG_00879	hypothetical protein FG00418.1 [Gibberella zeae PH-1]	1	3599217	hypothetical protein		5.49974	2	0	0	0	0	0
FVEG_00878	hypothetical protein FG00417.1 [Gibberella zeae PH-1]	1	3603874	methylenetetrahydrofolate dehydrogenase		0	1	0	0	0	0	0
FVEG_00877	hypothetical protein FG00416.1 [Gibberella zeae PH-1]	1	3607883	hypothetical protein		0	1	0	0	0	0	0
FVEG_00876	hypothetical protein LOC100274296 [Zea mays]_x0001_gb|ACF87721.1| unknown [Zea mays]	1	3611087	hypothetical protein		10.0065	2	0	0	0	0	0
FVEG_00875	hypothetical protein FG00414.1 [Gibberella zeae PH-1]	1	3617565	hypothetical protein		18.6417	4	0	0	0	0	0
FVEG_00874	hypothetical protein GLRG_11045 [Glomerella graminicola M1.001]	1	3619876	hypothetical protein		22.358	2	22.358	3	2	0	0
FVEG_00873	hypothetical protein NECHADRAFT_74979 [Nectria haematococca mpVI 77-13-4]_x0001_gb|EEU47916.1| hypothetical protein NECHADRAFT_74979 [Nectria haematococca mpVI 77-13-4]	1	3622248	hypothetical protein		0	1	22.358	3	2	0	0
FVEG_00872	hypothetical protein FG00411.1 [Gibberella zeae PH-1]	1	3624183	hypothetical protein		-5.40693	4	22.358	3	2	0	0
FVEG_00871	hypothetical protein FG00410.1 [Gibberella zeae PH-1]	1	3626513	hypothetical protein		9.69845	3	9.69845	3	3	0	0
FVEG_00870	predicted protein [Nectria haematococca mpVI 77-13-4]_x0001_gb|EEU48645.1| predicted protein [Nectria haematococca mpVI 77-13-4]	1	3631546	hypothetical protein		-5.96406	4	9.69845	3	3	0	0
FVEG_00869	hypothetical protein FG00408.1 [Gibberella zeae PH-1]	1	3633106	hypothetical protein		0	1	9.69845	3	3	0	0
FVEG_00868	-	1	3638764	hypothetical protein		-5.10319	4	0	0	0	0	0
FVEG_00867	-	1	3642508	hypothetical protein		-6.1567	4	0	0	0	0	0
FVEG_00866	hypothetical protein FG00407.1 [Gibberella zeae PH-1]	1	3645437	sporulation protein SPS19		-10.4422	4	0	0	0	0	0
FVEG_00865	hypothetical protein FG00406.1 [Gibberella zeae PH-1]	1	3648071	hypothetical protein		3.98279	6	0	0	0	0	0
FVEG_00864	hypothetical protein FG00405.1 [Gibberella zeae PH-1]	1	3649761	hypothetical protein		9.37033	3	0	0	0	0	0
FVEG_00863	hypothetical protein NECHADRAFT_30594 [Nectria haematococca mpVI 77-13-4]_x0001_gb|EEU47919.1| hypothetical protein NECHADRAFT_30594 [Nectria haematococca mpVI 77-13-4]	1	3656796	hypothetical protein		12.223	1	0	0	0	0	0
FVEG_00862	hypothetical protein NECHADRAFT_30594 [Nectria haematococca mpVI 77-13-4]_x0001_gb|EEU47919.1| hypothetical protein NECHADRAFT_30594 [Nectria haematococca mpVI 77-13-4]	1	3658526	hypothetical protein		2.57898	6	0	0	0	0	0
FVEG_00861	-	1	3659488	hypothetical protein		11.7828	3	0	0	0	0	0
FVEG_00860	hypothetical protein FG00403.1 [Gibberella zeae PH-1]	1	3660924	hypothetical protein		17.6161	3	17.6161	6	3	0	0
FVEG_00859	hypothetical protein FG00402.1 [Gibberella zeae PH-1]	1	3665545	hypothetical protein		0	1	17.6161	6	3	0	0
FVEG_00858	hypothetical protein NECHADRAFT_31391 [Nectria haematococca mpVI 77-13-4]_x0001_gb|EEU48650.1| hypothetical protein NECHADRAFT_31391 [Nectria haematococca mpVI 77-13-4]	1	3668159	hypothetical protein		14.041	3	17.6161	6	3	0	0
FVEG_00857	hypothetical protein FG00399.1 [Gibberella zeae PH-1]	1	3671967	hypothetical protein		16.0456	3	17.6161	6	3	0	0
FVEG_00856	hypothetical protein FG00398.1 [Gibberella zeae PH-1]_x0001_sp|Q4IQW0.1|NOP12_GIBZE RecName: Full=Nucleolar protein 12	1	3675078	nucleolar protein 12		0	1	17.6161	6	3	0	0
FVEG_00855	alpha2-tubulin [Gibberella zeae]	1	3677400	tubulin alpha chain		0	1	17.6161	6	3	0	0
FVEG_00854	FAD dependent oxidoreductase [Glomerella graminicola M1.001]	1	3684106	hypothetical protein		1.39544	3	0	0	0	0	0
FVEG_00853	betaine-aldehyde dehydrogenase, putative [Talaromyces stipitatus ATCC 10500]_x0001_gb|EED12292.1| betaine-aldehyde dehydrogenase, putative [Talaromyces stipitatus ATCC 10500]	1	3688822	hypothetical protein		-0.551811	5	0	0	0	0	0
FVEG_00852	hypothetical protein FG00396.1 [Gibberella zeae PH-1]	1	3690628	hypothetical protein		2.35291	3	0	0	0	0	0
FVEG_00851	RS15_PODAN 40S RIBOSOMAL PROTEIN S15 (S12) [Gibberella zeae PH-1]	1	3694240	40S ribosomal protein S15		-1.3607	4	0	0	0	0	0
FVEG_00850	-	1	3696472	hypothetical protein		2.60989	3	0	0	0	0	0
FVEG_00849	hypothetical protein FG00392.1 [Gibberella zeae PH-1]	1	3700270	hypothetical protein		-3.00101	5	0	0	0	0	0
FVEG_00848	hypothetical protein NECHADRAFT_74999 [Nectria haematococca mpVI 77-13-4]_x0001_gb|EEU47925.1| hypothetical protein NECHADRAFT_74999 [Nectria haematococca mpVI 77-13-4]	1	3703664	hypothetical protein		3.418	3	0	0	0	0	0
FVEG_00847	hypothetical protein NECHADRAFT_75000 [Nectria haematococca mpVI 77-13-4]_x0001_gb|EEU48656.1| hypothetical protein NECHADRAFT_75000 [Nectria haematococca mpVI 77-13-4]	1	3704470	hypothetical protein		-1.88067	4	0	0	0	0	0
FVEG_00846	-	1	3707910	hypothetical protein		6.18701	3	0	0	0	0	0
FVEG_00845	hypothetical protein FG00390.1 [Gibberella zeae PH-1]	1	3708974	hypothetical protein		10.046	3	0	0	0	0	0
FVEG_00844	hypothetical protein FG00389.1 [Gibberella zeae PH-1]	1	3710894	hypothetical protein		0	1	0	0	0	0	0
FVEG_00843	hypothetical protein FG00388.1 [Gibberella zeae PH-1]	1	3713157	hypothetical protein		6.63206	3	0	0	0	0	0
FVEG_00842	hypothetical protein FG00387.1 [Gibberella zeae PH-1]	1	3714348	phosphoglucomutase		2.99689	2	0	0	0	0	0
FVEG_00841	hypothetical protein NECHADRAFT_75005 [Nectria haematococca mpVI 77-13-4]_x0001_gb|EEU48658.1| hypothetical protein NECHADRAFT_75005 [Nectria haematococca mpVI 77-13-4]	1	3716499	hypothetical protein		-2.79626	4	0	0	0	0	0
FVEG_00840	HMG box-containing protein [Nectria haematococca mpVI 77-13-4]_x0001_gb|EEU48659.1| HMG box-containing protein [Nectria haematococca mpVI 77-13-4]	1	3720922	hypothetical protein		10.5497	3	0	0	0	0	0
FVEG_00839	hypothetical protein FG00383.1 [Gibberella zeae PH-1]	1	3726414	hypothetical protein		11.9672	3	0	0	0	0	0
FVEG_00838	hypothetical protein FG00382.1 [Gibberella zeae PH-1]	1	3727593	hypothetical protein		0	1	0	0	0	0	0
FVEG_00837	-	1	3732794	hypothetical protein		7.12166	2	0	0	0	0	0
FVEG_00836	hypothetical protein NECHADRAFT_75010 [Nectria haematococca mpVI 77-13-4]_x0001_gb|EEU47929.1| hypothetical protein NECHADRAFT_75010 [Nectria haematococca mpVI 77-13-4]	1	3734419	hypothetical protein		14.1137	3	0	0	0	0	0
FVEG_00835	hypothetical protein FG00380.1 [Gibberella zeae PH-1]	1	3736439	hypothetical protein		8.33723	6	0	0	0	0	0
FVEG_00834	glycosyltransferase family 31 [Nectria haematococca mpVI 77-13-4]_x0001_gb|EEU47931.1| glycosyltransferase family 31 [Nectria haematococca mpVI 77-13-4]	1	3739725	hypothetical protein		14.1642	3	14.1642	20	3	0	0
FVEG_00833	hypothetical protein FG00378.1 [Gibberella zeae PH-1]	1	3744416	hypothetical protein		0	1	14.1642	20	3	0	0
FVEG_00832	hypothetical protein FG00377.1 [Gibberella zeae PH-1]	1	3748593	hypothetical protein		10.3269	3	14.1642	20	3	0	0
FVEG_00831	NUCM_NEUCR NADH-ubiquinone oxidoreductase 49 kDa subunit, mitochondrial precursor (Complex I-49KD) (CI-49KD) [Gibberella zeae PH-1]	1	3750105	hypothetical protein		13.2126	1	14.1642	20	3	0	0
FVEG_00830	hypothetical protein FG00375.1 [Gibberella zeae PH-1]	1	3751873	hypothetical protein		12.6819	1	14.1642	20	3	0	0
FVEG_00829	hypothetical protein FG00374.1 [Gibberella zeae PH-1]	1	3753852	hypothetical protein		12.727	3	14.1642	20	3	0	0
FVEG_00828	hypothetical protein FG00373.1 [Gibberella zeae PH-1]	1	3756651	ATP synthase subunit 4, mitochondrial precursor		12.627	3	14.1642	20	3	0	0
FVEG_00827	predicted protein [Nectria haematococca mpVI 77-13-4]_x0001_gb|EEU47936.1| predicted protein [Nectria haematococca mpVI 77-13-4]	1	3758135	hypothetical protein		-9.17443	4	14.1642	20	3	0	0
FVEG_00826	hypothetical protein FG00371.1 [Gibberella zeae PH-1]	1	3761257	hypothetical protein		10.0505	3	14.1642	20	3	0	0
FVEG_00825	predicted protein [Nectria haematococca mpVI 77-13-4]_x0001_gb|EEU48664.1| predicted protein [Nectria haematococca mpVI 77-13-4]	1	3764734	hypothetical protein		6.85591	6	14.1642	20	3	0	0
FVEG_00824	hypothetical protein FG00369.1 [Gibberella zeae PH-1]	1	3766469	hypothetical protein		-7.92458	4	14.1642	20	3	0	0
FVEG_00823	hypothetical protein FG00368.1 [Gibberella zeae PH-1]	1	3772544	hypothetical protein		7.58819	1	14.1642	20	3	0	0
FVEG_00822	predicted protein [Nectria haematococca mpVI 77-13-4]_x0001_gb|EEU48665.1| predicted protein [Nectria haematococca mpVI 77-13-4]	1	3775337	proteasome subunit beta type 7 precursor		8.70335	3	14.1642	20	3	0	0
FVEG_00821	hypothetical protein FG00366.1 [Gibberella zeae PH-1]	1	3777074	hypothetical protein		0	1	14.1642	20	3	0	0
FVEG_00820	-	1	3782122	hypothetical protein		8.12351	3	14.1642	20	3	0	0
FVEG_00819	hypothetical protein FG00365.1 [Gibberella zeae PH-1]	1	3783570	DNA-directed RNA polymerases I and III 40 kDa polypeptide		5.3693	6	14.1642	20	3	0	0
FVEG_00818	hypothetical protein FG00364.1 [Gibberella zeae PH-1]	1	3785038	NEDD8-activating enzyme E1 catalytic subunit		7.69108	3	14.1642	20	3	0	0
FVEG_00817	hypothetical protein NECHADRAFT_31035 [Nectria haematococca mpVI 77-13-4]_x0001_gb|EEU47942.1| hypothetical protein NECHADRAFT_31035 [Nectria haematococca mpVI 77-13-4]	1	3788372	hypothetical protein		8.08254	3	14.1642	20	3	0	0
FVEG_00816	hypothetical protein FG00362.1 [Gibberella zeae PH-1]	1	3791143	hypothetical protein		0.750227	2	14.1642	20	3	0	0
FVEG_00815	hypothetical protein FG00361.1 [Gibberella zeae PH-1]	1	3795581	hypothetical protein		0	1	14.1642	20	3	0	0
FVEG_00814	predicted protein [Trichoderma reesei QM6a]	1	3796522	hypothetical protein		-8.62472	5	0	0	0	0	0
FVEG_00813	predicted protein [Nectria haematococca mpVI 77-13-4]_x0001_gb|EEU48669.1| predicted protein [Nectria haematococca mpVI 77-13-4]	1	3799269	hypothetical protein		0	1	0	0	0	0	0
FVEG_00812	hypothetical protein FG00358.1 [Gibberella zeae PH-1]	1	3802946	small nuclear ribonucleoprotein Sm D1		-16.1025	5	0	0	0	0	0
FVEG_00811	hypothetical protein FG00357.1 [Gibberella zeae PH-1]	1	3803726	hypothetical protein		-5.23696	4	0	0	0	0	0
FVEG_00810	hypothetical protein FG00356.1 [Gibberella zeae PH-1]	1	3805272	hypothetical protein		-17.6324	5	0	0	0	0	0
FVEG_00809	-	1	3813355	hypothetical protein		4.04886	1	0	0	0	0	0
FVEG_00808	hypothetical protein FG00353.1 [Gibberella zeae PH-1]	1	3814905	hypothetical protein		-17.9569	5	0	0	0	0	0
FVEG_00807	hypothetical protein FG00352.1 [Gibberella zeae PH-1]	1	3821298	hypothetical protein		2.06925	6	0	0	0	0	0
FVEG_00806	hypothetical protein NECHADRAFT_75042 [Nectria haematococca mpVI 77-13-4]_x0001_gb|EEU48674.1| hypothetical protein NECHADRAFT_75042 [Nectria haematococca mpVI 77-13-4]	1	3823956	hypothetical protein		7.93398	1	0	0	0	0	0
FVEG_00805	hypothetical protein FG00350.1 [Gibberella zeae PH-1]_x0001_sp|Q4IR08.1|ASF1_GIBZE RecName: Full=Histone chaperone ASF1; AltName: Full=Anti-silencing function protein 1	1	3827568	hypothetical protein		-18.9275	5	0	0	0	0	0
FVEG_00804	hypothetical protein FG00349.1 [Gibberella zeae PH-1]_x0001_sp|Q4IR09.1|RNA14_GIBZE RecName: Full=mRNA 3'-end-processing protein RNA14	1	3830129	hypothetical protein		18.0456	1	0	0	0	0	0
FVEG_00803	hypothetical protein FG00348.1 [Gibberella zeae PH-1]	1	3834779	hypothetical protein		-33.0256	5	0	0	0	0	0
FVEG_00802	hypothetical protein FG00347.1 [Gibberella zeae PH-1]	1	3839133	hypothetical protein		-29.3181	5	0	0	0	0	0
FVEG_00801	hypothetical protein FG00346.1 [Gibberella zeae PH-1]	1	3840385	saccharopine dehydrogenase		-27.732	5	0	0	0	0	0
FVEG_00800	-	1	3844997	hypothetical protein		-33.2639	5	0	0	0	0	0
FVEG_00799	hypothetical protein FG00345.1 [Gibberella zeae PH-1]	1	3847645	hypothetical protein		-2.91667	2	0	0	0	0	0
FVEG_00798	hypothetical protein FG00343.1 [Gibberella zeae PH-1]	1	3851068	hypothetical protein		3.41303	1	0	0	0	0	0
FVEG_00797	hypothetical protein FG00342.1 [Gibberella zeae PH-1]	1	3856695	hypothetical protein		-1.60118	4	0	0	0	0	0
FVEG_00796	-	1	3866860	hypothetical protein		10.2768	1	0	0	0	0	0
FVEG_00795	-	1	3868922	hypothetical protein		18.2305	1	0	0	0	0	0
FVEG_00794	hypothetical protein FG00341.1 [Gibberella zeae PH-1]	1	3870713	hypothetical protein		36.9077	1	0	0	0	0	0
FVEG_00793	hypothetical protein FG00340.1 [Gibberella zeae PH-1]_x0001_sp|Q4IR18.1|GRC3_GIBZE RecName: Full=Polynucleotide 5'-hydroxyl-kinase GRC3	1	3877209	protein GRC3		61.3753	1	61.3753	3	1	0	0
FVEG_00792	hypothetical protein NECHADRAFT_98869 [Nectria haematococca mpVI 77-13-4]_x0001_gb|EEU47955.1| hypothetical protein NECHADRAFT_98869 [Nectria haematococca mpVI 77-13-4]	1	3880171	hypothetical protein		0	1	61.3753	3	1	0	0
FVEG_00791	-	1	3887308	hypothetical protein		1.43563	6	61.3753	3	1	0	0
FVEG_00790	hypothetical protein FG00338.1 [Gibberella zeae PH-1]	1	3889467	hypothetical protein		2.21043	3	0	0	0	0	0
FVEG_00789	hypothetical protein GLRG_06706 [Glomerella graminicola M1.001]	1	3892650	calcium/calmodulin-dependent protein kinase type I		3.56083	3	0	0	0	0	0
FVEG_00788	hypothetical protein NECHADRAFT_90216 [Nectria haematococca mpVI 77-13-4]_x0001_gb|EEU47957.1| hypothetical protein NECHADRAFT_90216 [Nectria haematococca mpVI 77-13-4]	1	3896899	hypothetical protein		4.50588	3	4.50588	3	3	0	0
FVEG_00787	hypothetical protein FG00334.1 [Gibberella zeae PH-1]	1	3900347	hypothetical protein		1.16204	6	4.50588	3	3	0	0
FVEG_00786	hypothetical protein FG00333.1 [Gibberella zeae PH-1]	1	3902823	hypothetical protein		0.848877	2	4.50588	3	3	0	0
FVEG_00785	-	1	3906965	hypothetical protein		0	1	0	0	0	0	0
FVEG_00784	hypothetical protein FG00332.1 [Gibberella zeae PH-1]	1	3908814	hypothetical protein		0	1	0	0	0	0	0
FVEG_00783	hypothetical protein FG00331.1 [Gibberella zeae PH-1]	1	3913260	hypothetical protein		-7.8679	4	7.8679	3	4	0	0
FVEG_00782	hypothetical protein NECHADRAFT_98871 [Nectria haematococca mpVI 77-13-4]_x0001_gb|EEU48688.1| hypothetical protein NECHADRAFT_98871 [Nectria haematococca mpVI 77-13-4]	1	3914117	hypothetical protein		5.57754	6	7.8679	3	4	0	0
FVEG_00781	hypothetical protein FG00330.1 [Gibberella zeae PH-1]	1	3919046	acetyl-coenzyme A synthetase		3.53419	2	7.8679	3	4	0	0
FVEG_00780	predicted protein [Nectria haematococca mpVI 77-13-4]_x0001_gb|EEU48690.1| predicted protein [Nectria haematococca mpVI 77-13-4]	1	3925181	replication factor C subunit 5		0	1	0	0	0	0	0
FVEG_00779	hypothetical protein FG00328.1 [Gibberella zeae PH-1]	1	3926740	hypothetical protein		2.05331	3	2.05331	3	3	0	0
FVEG_00778	hypothetical protein FG00327.1 [Gibberella zeae PH-1]	1	3927942	hypothetical protein		0	1	2.05331	3	3	0	0
FVEG_00777	hypothetical protein NECHADRAFT_30719 [Nectria haematococca mpVI 77-13-4]_x0001_gb|EEU47959.1| hypothetical protein NECHADRAFT_30719 [Nectria haematococca mpVI 77-13-4]	1	3930228	hypothetical protein		-1.42911	5	2.05331	3	3	0	0
FVEG_00776	hypothetical protein FG00326.1 [Gibberella zeae PH-1]	1	3932102	hypothetical protein		0	1	0	0	0	0	0
FVEG_00775	hypothetical protein FG00325.1 [Gibberella zeae PH-1]	1	3936761	hypothetical protein		3.09718	6	3.09718	3	6	0	0
FVEG_00774	-	1	3938142	hypothetical protein		1.01488	1	3.09718	3	6	0	0
FVEG_00773	hypothetical protein FG00324.1 [Gibberella zeae PH-1]	1	3939432	hypothetical protein		0	1	3.09718	3	6	0	0
FVEG_00772	-	1	3944115	hypothetical protein		-4.24148	5	0	0	0	0	0
FVEG_00771	DHYS_NEUCR Deoxyhypusine synthase (DHS) [Gibberella zeae PH-1]_x0001_gb|ADE59475.1| deoxyhypusine synthase [Gibberella zeae]	1	3945469	deoxyhypusine synthase		0.391954	6	0	0	0	0	0
FVEG_00770	hypothetical protein NECHADRAFT_103180 [Nectria haematococca mpVI 77-13-4]_x0001_gb|EEU48694.1| hypothetical protein NECHADRAFT_103180 [Nectria haematococca mpVI 77-13-4]	1	3946945	hypothetical protein		-1.15707	4	0	0	0	0	0
FVEG_00769	hypothetical protein FG00320.1 [Gibberella zeae PH-1]	1	3950035	hypothetical protein		-6.23557	5	0	0	0	0	0
FVEG_00768	hypothetical protein FG00319.1 [Gibberella zeae PH-1]	1	3952974	hypothetical protein		-6.40097	5	0	0	0	0	0
FVEG_00767	hypothetical protein FG00318.1 [Gibberella zeae PH-1]	1	3954653	hypothetical protein		-5.56468	5	0	0	0	0	0
FVEG_00766	-	1	3959677	hypothetical protein		0	1	0	0	0	0	0
FVEG_00765	-	1	3962819	hypothetical protein		-3.98046	5	0	0	0	0	0
FVEG_00764	-	1	3966748	hypothetical protein		-4.53639	5	0	0	0	0	0
FVEG_00763	hypothetical protein FG00316.1 [Gibberella zeae PH-1]_x0001_gb|ABJ55994.1| RING-7 protein [Gibberella zeae]	1	3969947	hypothetical protein		-4.14991	6	0	0	0	0	0
FVEG_00762	hypothetical protein FG00315.1 [Gibberella zeae PH-1]	1	3975626	hypothetical protein		-7.11755	3	0	0	0	0	0
FVEG_00761	hypothetical protein LOC100382687 [Zea mays]_x0001_gb|ACN30924.1| unknown [Zea mays]	1	3977861	hypothetical protein		-16.3009	1	16.3009	3	1	0	0
FVEG_00760	hypothetical protein FG00313.1 [Gibberella zeae PH-1]	1	3983422	hypothetical protein		-7.70267	5	16.3009	3	1	0	0
FVEG_00759	hypothetical protein NECHADRAFT_75082 [Nectria haematococca mpVI 77-13-4]_x0001_gb|EEU47968.1| hypothetical protein NECHADRAFT_75082 [Nectria haematococca mpVI 77-13-4]	1	3985874	hypothetical protein		0	1	16.3009	3	1	0	0
FVEG_00758	hypothetical protein FG00311.1 [Gibberella zeae PH-1]	1	3987072	hypothetical protein		-4.45124	4	0	0	0	0	0
FVEG_00757	predicted protein [Nectria haematococca mpVI 77-13-4]_x0001_gb|EEU47969.1| predicted protein [Nectria haematococca mpVI 77-13-4]	1	3989811	hypothetical protein		15.0135	1	0	0	0	0	0
FVEG_00756	hypothetical protein FG00309.1 [Gibberella zeae PH-1]	1	3990767	hypothetical protein		0.520444	5	0	0	0	0	0
FVEG_00755	hypothetical protein FG00308.1 [Gibberella zeae PH-1]	1	3993479	hypothetical protein		15.0906	1	0	0	0	0	0
FVEG_00754	hypothetical protein FG00307.1 [Gibberella zeae PH-1]	1	3996135	hypothetical protein		0	1	0	0	0	0	0
FVEG_00753	hypothetical protein FG00306.1 [Gibberella zeae PH-1]	1	4000709	26S proteasome non-ATPase regulatory subunit 11		15.9148	1	0	0	0	0	0
FVEG_00752	hypothetical protein FG00305.1 [Gibberella zeae PH-1]	1	4002716	hypothetical protein		15.9725	1	15.9725	22	1	0	0
FVEG_00751	hypothetical protein FG00304.1 [Gibberella zeae PH-1]	1	4004508	GTP-binding protein RHO1		0	1	15.9725	22	1	0	0
FVEG_00750	predicted protein [Nectria haematococca mpVI 77-13-4]_x0001_gb|EEU47973.1| predicted protein [Nectria haematococca mpVI 77-13-4]	1	4006596	hypothetical protein		12.5989	1	15.9725	22	1	0	0
FVEG_00749	hypothetical protein FG00302.1 [Gibberella zeae PH-1]	1	4008199	hypothetical protein		13.3252	1	15.9725	22	1	0	0
FVEG_00748	Probable maintenance of ploidy protein mob1 [Salmo salar]_x0001_gb|ACI67249.1| Probable maintenance of ploidy protein mob1 [Salmo salar]	1	4010319	hypothetical protein		13.3841	1	15.9725	22	1	0	0
FVEG_00747	hypothetical protein FG00300.1 [Gibberella zeae PH-1]	1	4012003	ATP synthase subunit 5, mitochondrial precursor		13.6689	1	15.9725	22	1	0	0
FVEG_00746	glycoside hydrolase family 63 [Nectria haematococca mpVI 77-13-4]_x0001_gb|EEU48701.1| glycoside hydrolase family 63 [Nectria haematococca mpVI 77-13-4]	1	4013623	hypothetical protein		0	1	15.9725	22	1	0	0
FVEG_00745	predicted protein [Nectria haematococca mpVI 77-13-4]_x0001_gb|EEU47977.1| predicted protein [Nectria haematococca mpVI 77-13-4]	1	4019778	hypothetical protein		-13.8243	4	15.9725	22	1	0	0
FVEG_00744	hypothetical protein FG00297.1 [Gibberella zeae PH-1]	1	4022023	hypothetical protein		13.8086	1	15.9725	22	1	0	0
FVEG_00743	hypothetical protein FG00817.1 [Gibberella zeae PH-1]	1	4028618	hypothetical protein		1.18968	5	15.9725	22	1	0	0
FVEG_00742	hypothetical protein FG00818.1 [Gibberella zeae PH-1]	1	4031392	hypothetical protein		9.0464	3	15.9725	22	1	0	0
FVEG_00741	hypothetical protein FG00819.1 [Gibberella zeae PH-1]_x0001_sp|Q4IPN9.1|YSH1_GIBZE RecName: Full=Endoribonuclease YSH1; AltName: Full=mRNA 3'-end-processing protein YSH1	1	4034465	endoribonuclease ysh-1		0	1	15.9725	22	1	0	0
FVEG_00740	predicted protein [Nectria haematococca mpVI 77-13-4]_x0001_gb|EEU48702.1| predicted protein [Nectria haematococca mpVI 77-13-4]	1	4036838	hypothetical protein		7.81504	2	15.9725	22	1	0	0
FVEG_00739	hypothetical protein FG00820.1 [Gibberella zeae PH-1]	1	4038093	hypothetical protein		11.4103	2	15.9725	22	1	0	0
FVEG_00738	hypothetical protein FG00821.1 [Gibberella zeae PH-1]	1	4041362	hypothetical protein		3.83232	6	15.9725	22	1	0	0
FVEG_00737	hypothetical protein FG00822.1 [Gibberella zeae PH-1]	1	4056321	hypothetical protein		8.63192	3	15.9725	22	1	0	0
FVEG_00736	hypothetical protein FG00823.1 [Gibberella zeae PH-1]	1	4057282	hypothetical protein		9.44192	3	15.9725	22	1	0	0
FVEG_00735	hypothetical protein FG00824.1 [Gibberella zeae PH-1]	1	4059241	hypothetical protein		7.64512	3	15.9725	22	1	0	0
FVEG_00734	hypothetical protein NECHADRAFT_75105 [Nectria haematococca mpVI 77-13-4]_x0001_gb|EEU48704.1| hypothetical protein NECHADRAFT_75105 [Nectria haematococca mpVI 77-13-4]	1	4062715	hypothetical protein		7.12516	3	15.9725	22	1	0	0
FVEG_00733	hypothetical protein FG00826.1 [Gibberella zeae PH-1]	1	4063880	hypothetical protein		3.70362	6	15.9725	22	1	0	0
FVEG_00732	hypothetical protein FG00827.1 [Gibberella zeae PH-1]	1	4065381	hypothetical protein		6.22229	3	15.9725	22	1	0	0
FVEG_00731	hypothetical protein FG00828.1 [Gibberella zeae PH-1]	1	4067810	hypothetical protein		3.7421	6	15.9725	22	1	0	0
FVEG_00730	hypothetical protein FG00829.1 [Gibberella zeae PH-1]	1	4069760	hypothetical protein		5.81549	3	0	0	0	0	0
FVEG_00729	hypothetical protein FG00830.1 [Gibberella zeae PH-1]	1	4075513	hypothetical protein		-3.12783	4	0	0	0	0	0
FVEG_00728	-	1	4078267	hypothetical protein		9.16553	3	0	0	0	0	0
FVEG_00727	hypothetical protein FG00831.1 [Gibberella zeae PH-1]	1	4080770	hypothetical protein		8.44087	1	0	0	0	0	0
FVEG_00726	predicted protein [Nectria haematococca mpVI 77-13-4]_x0001_gb|EEU48706.1| predicted protein [Nectria haematococca mpVI 77-13-4]	1	4083771	hypothetical protein		9.8662	3	0	0	0	0	0
FVEG_00725	hypothetical protein FG00833.1 [Gibberella zeae PH-1]	1	4085635	protein SEY1		15.7435	3	0	0	0	0	0
FVEG_00724	hypothetical protein FG00834.1 [Gibberella zeae PH-1]	1	4088727	hypothetical protein		13.5312	3	0	0	0	0	0
FVEG_00723	hypothetical protein FG00835.1 [Gibberella zeae PH-1]	1	4090567	hypothetical protein		3.9474	6	0	0	0	0	0
FVEG_00722	hypothetical protein FG00836.1 [Gibberella zeae PH-1]	1	4093134	hypothetical protein		4.48627	2	0	0	0	0	0
FVEG_00721	hypothetical protein NECHADRAFT_75122 [Nectria haematococca mpVI 77-13-4]_x0001_gb|EEU48711.1| hypothetical protein NECHADRAFT_75122 [Nectria haematococca mpVI 77-13-4]	1	4096906	hypothetical protein		4.69131	3	0	0	0	0	0
FVEG_00720	heat shock protein 70-1 [Nicotiana tabacum]	1	4098134	heat shock 70 kDa protein		3.70992	2	0	0	0	0	0
FVEG_00719	hypothetical protein FG00839.1 [Gibberella zeae PH-1]	1	4103127	hypothetical protein		3.47106	6	0	0	0	0	0
FVEG_00718	hypothetical protein FG00839.1 [Gibberella zeae PH-1]	1	4104654	hypothetical protein		-2.80519	4	0	0	0	0	0
FVEG_00717	hypothetical protein FG00840.1 [Gibberella zeae PH-1]	1	4110320	hypothetical protein		7.51673	3	0	0	0	0	0
FVEG_00716	RNA-binding protein, putative [Metarhizium anisopliae ARSEF 23]	1	4113539	hypothetical protein		0	1	0	0	0	0	0
FVEG_00715	-	1	4122125	hypothetical protein		22.1587	2	0	0	0	0	0
FVEG_00714	hypothetical protein FG00843.1 [Gibberella zeae PH-1]	1	4124080	DNA-directed RNA polymerase III 130 kDa polypeptide		0	1	0	0	0	0	0
FVEG_00713	hypothetical protein FG00844.1 [Gibberella zeae PH-1]	1	4127952	hypothetical protein		34.0725	2	34.0725	3	2	0	0
FVEG_00712	predicted protein [Nectria haematococca mpVI 77-13-4]_x0001_gb|EEU48716.1| predicted protein [Nectria haematococca mpVI 77-13-4]	1	4129919	60S ribosomal protein L15		7.99303	3	34.0725	3	2	0	0
FVEG_00711	-	1	4131585	hypothetical protein		6.0899	5	34.0725	3	2	0	0
FVEG_00710	hypothetical protein FG00846.1 [Gibberella zeae PH-1]	1	4132766	hypothetical protein		1.45467	2	0	0	0	0	0
FVEG_00709	-	1	4137915	hypothetical protein		1.36029	6	0	0	0	0	0
FVEG_00708	-	1	4141836	hypothetical protein		5.41751	5	0	0	0	0	0
FVEG_00707	hypothetical protein FG00848.1 [Gibberella zeae PH-1]	1	4145164	hypothetical protein		0	1	0	0	0	0	0
FVEG_00706	hypothetical protein FG00849.1 [Gibberella zeae PH-1]	1	4148725	hypothetical protein		5.61199	5	0	0	0	0	0
FVEG_00705	hypothetical protein FG00851.1 [Gibberella zeae PH-1]	1	4153643	hypothetical protein		3.56689	2	0	0	0	0	0
FVEG_00704	hypothetical protein FG00852.1 [Gibberella zeae PH-1]	1	4157532	serine/threonine-protein phosphatase PP-Z		5.03101	3	0	0	0	0	0
FVEG_00703	hypothetical protein FG00853.1 [Gibberella zeae PH-1]	1	4160182	hypothetical protein		6.74323	5	0	0	0	0	0
FVEG_00702	hypothetical protein FG00854.1 [Gibberella zeae PH-1]	1	4161300	hypothetical protein		4.97235	3	0	0	0	0	0
FVEG_00701	hypothetical protein FG00933.1 [Gibberella zeae PH-1]	1	4163315	hypothetical protein		8.70283	5	0	0	0	0	0
FVEG_00700	hypothetical protein FG00932.1 [Gibberella zeae PH-1]	1	4165465	hypothetical protein		2.68609	2	0	0	0	0	0
FVEG_00699	hypothetical protein FG00931.1 [Gibberella zeae PH-1]	1	4170107	hypothetical protein		6.63785	5	0	0	0	0	0
FVEG_00698	hypothetical protein FG00930.1 [Gibberella zeae PH-1]_x0001_sp|Q4IPC8.1|SSU72_GIBZE RecName: Full=RNA polymerase II subunit A C-terminal domain phosphatase SSU72; Short=CTD phosphatase SSU72; AltName: Full=Suppressor of SUA7 protein 2 homolog	1	4173311	protein SSU72		5.93161	6	0	0	0	0	0
FVEG_00697	hypothetical protein NECHADRAFT_75211 [Nectria haematococca mpVI 77-13-4]_x0001_gb|EEU48749.1| hypothetical protein NECHADRAFT_75211 [Nectria haematococca mpVI 77-13-4]	1	4177896	hypothetical protein		4.84585	5	0	0	0	0	0
FVEG_00696	hypothetical protein FG00926.1 [Gibberella zeae PH-1]	1	4180049	hypothetical protein		4.49051	6	0	0	0	0	0
FVEG_00695	hypothetical protein FG00925.1 [Gibberella zeae PH-1]	1	4181751	hypothetical protein		7.71183	5	0	0	0	0	0
FVEG_00694	hypothetical protein NECHADRAFT_13627 [Nectria haematococca mpVI 77-13-4]_x0001_gb|EEU48750.1| hypothetical protein NECHADRAFT_13627 [Nectria haematococca mpVI 77-13-4]	1	4186196	hypothetical protein		2.64753	4	0	0	0	0	0
FVEG_00693	-	1	4189330	hypothetical protein		0	1	0	0	0	0	0
FVEG_00692	-	1	4191510	hypothetical protein		4.76469	5	0	0	0	0	0
FVEG_00691	hypothetical protein FG00923.1 [Gibberella zeae PH-1]	1	4195766	hypothetical protein		5.62536	5	0	0	0	0	0
FVEG_00690	hypothetical protein FG00922.1 [Gibberella zeae PH-1]	1	4199783	hypothetical protein		3.6348	2	0	0	0	0	0
FVEG_00689	hypothetical protein FG00920.1 [Gibberella zeae PH-1]	1	4204457	hypothetical protein		9.6526	5	0	0	0	0	0
FVEG_00688	predicted protein [Nectria haematococca mpVI 77-13-4]_x0001_gb|EEU48050.1| predicted protein [Nectria haematococca mpVI 77-13-4]	1	4208148	hypothetical protein		0	1	0	0	0	0	0
FVEG_00687	-	1	4215691	hypothetical protein		5.192	3	0	0	0	0	0
FVEG_00686	-	1	4221582	hypothetical protein		6.68111	3	0	0	0	0	0
FVEG_00685	hypothetical protein FG00918.1 [Gibberella zeae PH-1]	1	4225198	hypothetical protein		5.33043	1	0	0	0	0	0
FVEG_00684	hypothetical protein FG00917.1 [Gibberella zeae PH-1]	1	4228084	hypothetical protein		9.40111	3	0	0	0	0	0
FVEG_00683	predicted protein [Nectria haematococca mpVI 77-13-4]_x0001_gb|EEU48753.1| predicted protein [Nectria haematococca mpVI 77-13-4]	1	4230657	DNA-directed RNA polymerase II largest subunit		9.21838	1	0	0	0	0	0
FVEG_00682	hypothetical protein FG00915.1 [Gibberella zeae PH-1]	1	4237431	hypothetical protein		11.9208	2	11.9208	3	2	0	0
FVEG_00681	tRNA(His) guanylyltransferase [Metarhizium acridum CQMa 102]	1	4239631	hypothetical protein		6.44715	3	11.9208	3	2	0	0
FVEG_00680	hypothetical protein NECHADRAFT_75226 [Nectria haematococca mpVI 77-13-4]_x0001_gb|EEU48755.1| hypothetical protein NECHADRAFT_75226 [Nectria haematococca mpVI 77-13-4]	1	4240917	hypothetical protein		3.31322	6	11.9208	3	2	0	0
FVEG_00679	hypothetical protein FG00902.1 [Gibberella zeae PH-1]	1	4242110	hypothetical protein		5.61977	3	0	0	0	0	0
FVEG_00678	hypothetical protein FG00912.1 [Gibberella zeae PH-1]	1	4244507	hypothetical protein		7.9982	3	0	0	0	0	0
FVEG_00677	hypothetical protein FG00903.1 [Gibberella zeae PH-1]	1	4247585	cysteine synthase 2		8.09116	1	8.09116	3	1	0	0
FVEG_00676	hypothetical protein FG00905.1 [Gibberella zeae PH-1]	1	4249766	hypothetical protein		-3.47656	4	8.09116	3	1	0	0
FVEG_00675	hypothetical protein FG00906.1 [Gibberella zeae PH-1]	1	4251653	alanyl-tRNA synthetase		0	1	8.09116	3	1	0	0
FVEG_00674	hypothetical protein NECHADRAFT_75232 [Nectria haematococca mpVI 77-13-4]_x0001_gb|EEU48758.1| hypothetical protein NECHADRAFT_75232 [Nectria haematococca mpVI 77-13-4]	1	4255586	hypothetical protein		2.42247	1	0	0	0	0	0
FVEG_00673	hypothetical protein FG00908.1 [Gibberella zeae PH-1]	1	4256413	hypothetical protein		2.7792	1	0	0	0	0	0
FVEG_00672	hypothetical protein FG00909.1 [Gibberella zeae PH-1]	1	4258485	hypothetical protein		3.23293	2	0	0	0	0	0
FVEG_00671	hypothetical protein FG00911.1 [Gibberella zeae PH-1]	1	4262332	uracil-DNA glycosylase		2.56566	3	0	0	0	0	0
FVEG_00670	hypothetical protein FG00910.1 [Gibberella zeae PH-1]	1	4267144	hypothetical protein		2.39191	3	0	0	0	0	0
FVEG_00669	hypothetical protein NECHADRAFT_65808 [Nectria haematococca mpVI 77-13-4]_x0001_gb|EEU48761.1| hypothetical protein NECHADRAFT_65808 [Nectria haematococca mpVI 77-13-4]	1	4271076	hypothetical protein		0	1	0	0	0	0	0
FVEG_00668	hypothetical protein FG00901.1 [Gibberella zeae PH-1]	1	4275284	hypothetical protein		2.6661	2	0	0	0	0	0
FVEG_00667	predicted protein [Nectria haematococca mpVI 77-13-4]_x0001_gb|EEU48762.1| predicted protein [Nectria haematococca mpVI 77-13-4]	1	4275809	sphingolipid long chain base-responsive protein PIL1		2.6221	1	0	0	0	0	0
FVEG_00666	hypothetical protein FG00899.1 [Gibberella zeae PH-1]	1	4279520	hypothetical protein		0	1	0	0	0	0	0
FVEG_00665	hypothetical protein FG00898.1 [Gibberella zeae PH-1]	1	4284256	hypothetical protein		2.89163	1	0	0	0	0	0
FVEG_00664	hypothetical protein FG00897.1 [Gibberella zeae PH-1]	1	4285350	hypothetical protein		7.39449	2	0	0	0	0	0
FVEG_00663	hypothetical protein NECHADRAFT_75242 [Nectria haematococca mpVI 77-13-4]_x0001_gb|EEU48764.1| hypothetical protein NECHADRAFT_75242 [Nectria haematococca mpVI 77-13-4]	1	4287622	hypothetical protein		7.87485	2	0	0	0	0	0
FVEG_00662	hypothetical protein NECHADRAFT_75243 [Nectria haematococca mpVI 77-13-4]_x0001_gb|EEU48765.1| hypothetical protein NECHADRAFT_75243 [Nectria haematococca mpVI 77-13-4]	1	4289149	hypothetical protein		0.774967	5	0	0	0	0	0
FVEG_00661	hypothetical protein FG00894.1 [Gibberella zeae PH-1]	1	4292135	hypothetical protein		5.874	3	0	0	0	0	0
FVEG_00660	hypothetical protein FG00893.1 [Gibberella zeae PH-1]	1	4292802	hypothetical protein		4.01145	6	0	0	0	0	0
FVEG_00659	hypothetical protein FG00892.1 [Gibberella zeae PH-1]	1	4294350	hypothetical protein		0	1	0	0	0	0	0
FVEG_00658	predicted protein [Trichoderma reesei QM6a]	1	4297844	hypothetical protein		3.30526	6	0	0	0	0	0
FVEG_00657	-	1	4304780	hypothetical protein		2.48993	3	0	0	0	0	0
FVEG_00656	-	1	4305800	hypothetical protein		4.48816	2	0	0	0	0	0
FVEG_00655	hypothetical protein FG00890.1 [Gibberella zeae PH-1]	1	4306391	hypothetical protein		4.26183	6	0	0	0	0	0
FVEG_00654	hypothetical protein FG00889.1 [Gibberella zeae PH-1]	1	4307807	hypothetical protein		36.9804	2	36.9804	3	2	0	0
FVEG_00653	hypothetical protein FG00888.1 [Gibberella zeae PH-1]	1	4309846	hypothetical protein		0	1	36.9804	3	2	0	0
FVEG_00652	hypothetical protein FG00888.1 [Gibberella zeae PH-1]	1	4311792	hypothetical protein		2.60859	5	36.9804	3	2	0	0
FVEG_00651	hypothetical protein FG00887.1 [Gibberella zeae PH-1]_x0001_gb|ACF18585.1| COM1 [Gibberella zeae]	1	4313295	hypothetical protein		0	1	0	0	0	0	0
FVEG_00650	-	1	4317893	hypothetical protein		10.4291	6	0	0	0	0	0
FVEG_00649	dynein light chain [Metarhizium anisopliae ARSEF 23]	1	4324575	hypothetical protein		12.9512	6	0	0	0	0	0
FVEG_00648	-	1	4326685	hypothetical protein		15.8954	6	0	0	0	0	0
FVEG_00647	hypothetical protein NECHADRAFT_30669 [Nectria haematococca mpVI 77-13-4]_x0001_gb|EEU48062.1| hypothetical protein NECHADRAFT_30669 [Nectria haematococca mpVI 77-13-4]	1	4329326	multiple RNA-binding domain-containing protein 1		-21.0654	4	0	0	0	0	0
FVEG_00646	hypothetical protein NECHADRAFT_98929 [Nectria haematococca mpVI 77-13-4]_x0001_gb|EEU48063.1| hypothetical protein NECHADRAFT_98929 [Nectria haematococca mpVI 77-13-4]	1	4333100	hypothetical protein		1.3686	2	0	0	0	0	0
FVEG_00645	hypothetical protein NECHADRAFT_75253 [Nectria haematococca mpVI 77-13-4]_x0001_gb|EEU48064.1| hypothetical protein NECHADRAFT_75253 [Nectria haematococca mpVI 77-13-4]	1	4340003	hypothetical protein		7.25161	3	0	0	0	0	0
FVEG_00644	predicted protein [Nectria haematococca mpVI 77-13-4]_x0001_gb|EEU48772.1| predicted protein [Nectria haematococca mpVI 77-13-4]	1	4342288	peptidyl-prolyl cis-trans isomerase H		10.0944	6	0	0	0	0	0
FVEG_00643	hypothetical protein FG00883.1 [Gibberella zeae PH-1]	1	4347776	hypothetical protein		5.11971	1	0	0	0	0	0
FVEG_00642	hypothetical protein FG00882.1 [Gibberella zeae PH-1]	1	4349492	hypothetical protein		0	1	0	0	0	0	0
FVEG_00641	hypothetical protein FG00881.1 [Gibberella zeae PH-1]	1	4351472	hypothetical protein		24.8628	5	0	0	0	0	0
FVEG_00640	hypothetical protein FG00881.1 [Gibberella zeae PH-1]	1	4352917	hypothetical protein		0	1	0	0	0	0	0
FVEG_00638	hypothetical protein FG00879.1 [Gibberella zeae PH-1]	1	4361597	hypothetical protein		9.01979	3	0	0	0	0	0
FVEG_00637	-	1	4365116	hypothetical protein		0	1	0	0	0	0	0
FVEG_00636	-	1	4366162	hypothetical protein		-9.93643	5	0	0	0	0	0
FVEG_00635	-	1	4368023	hypothetical protein		9.45139	3	0	0	0	0	0
FVEG_00634	hypothetical protein FG00878.1 [Gibberella zeae PH-1]	1	4369544	hypothetical protein		-5.16585	4	0	0	0	0	0
FVEG_00633	hypothetical protein LOC100382656 [Zea mays]_x0001_gb|ACN30857.1| unknown [Zea mays]	1	4371041	ATP-dependent RNA helicase rok-1		-7.17985	4	0	0	0	0	0
FVEG_00632	hypothetical protein FG00876.1 [Gibberella zeae PH-1]	1	4374889	hypothetical protein		12.7861	1	0	0	0	0	0
FVEG_00631	hypothetical protein FG00875.1 [Gibberella zeae PH-1]	1	4376681	hypothetical protein		16.4054	3	0	0	0	0	0
FVEG_00630	Actin-related protein, ARP4 class [Nectria haematococca mpVI 77-13-4]_x0001_gb|EEU48074.1| Actin-related protein, ARP4 class [Nectria haematococca mpVI 77-13-4]	1	4379217	hypothetical protein		0	1	0	0	0	0	0
FVEG_00629	hypothetical protein FG00873.1 [Gibberella zeae PH-1]	1	4380984	hypothetical protein		14.3079	3	0	0	0	0	0
FVEG_00628	hypothetical protein FG00872.1 [Gibberella zeae PH-1]	1	4383084	UDP-N-acetylglucosamine pyrophosphorylase		0	1	0	0	0	0	0
FVEG_00627	hypothetical protein FG00871.1 [Gibberella zeae PH-1]	1	4385061	thioredoxin reductase		18.8328	3	0	0	0	0	0
FVEG_00626	hypothetical protein FG00870.1 [Gibberella zeae PH-1]	1	4387019	hypothetical protein		24.2749	3	0	0	0	0	0
FVEG_00625	hypothetical protein FG00869.1 [Gibberella zeae PH-1]	1	4389914	hypothetical protein		26.1289	3	0	0	0	0	0
FVEG_00624	hypothetical protein FG00869.1 [Gibberella zeae PH-1]	1	4393000	hypothetical protein		27.8164	3	27.8164	7	3	0	0
FVEG_00623	hypothetical protein FG00866.1 [Gibberella zeae PH-1]	1	4397108	nuclear elongation and deformation protein 1		27.2049	3	27.8164	7	3	0	0
FVEG_00622	hypothetical protein FG00865.1 [Gibberella zeae PH-1]	1	4399963	histidine biosynthesis trifunctional protein		0	1	27.8164	7	3	0	0
FVEG_00620	hypothetical protein FG00863.1 [Gibberella zeae PH-1]	1	4403092	mitochondrial-processing peptidase subunit beta		0	1	27.8164	7	3	0	0
FVEG_00621	hypothetical protein FG00864.1 [Gibberella zeae PH-1]	1	4403351	hypothetical protein		16.0537	3	27.8164	7	3	0	0
FVEG_00619	hypothetical protein FG00862.1 [Gibberella zeae PH-1]	1	4407067	hypothetical protein		5.28346	2	27.8164	7	3	0	0
FVEG_00618	hypothetical protein FG00861.1 [Gibberella zeae PH-1]	1	4409803	inosine-5'-monophosphate dehydrogenase 1		0	1	27.8164	7	3	0	0
FVEG_00617	hypothetical protein FG00860.1 [Gibberella zeae PH-1]	1	4412494	hypothetical protein		-2.94309	4	0	0	0	0	0
FVEG_00616	hypothetical protein NECHADRAFT_75282 [Nectria haematococca mpVI 77-13-4]_x0001_gb|EEU48784.1| hypothetical protein NECHADRAFT_75282 [Nectria haematococca mpVI 77-13-4]	1	4414393	hypothetical protein		0	1	0	0	0	0	0
FVEG_00615	hypothetical protein NECHADRAFT_75283 [Nectria haematococca mpVI 77-13-4]_x0001_gb|EEU48785.1| hypothetical protein NECHADRAFT_75283 [Nectria haematococca mpVI 77-13-4]	1	4416265	hypothetical protein		6.78759	6	0	0	0	0	0
FVEG_00614	hypothetical protein FG00858.1 [Gibberella zeae PH-1]	1	4417143	hypothetical protein		2.96809	1	0	0	0	0	0
FVEG_00613	hypothetical protein FG00857.1 [Gibberella zeae PH-1]	1	4428936	hypothetical protein		7.16459	6	0	0	0	0	0
FVEG_00612	hypothetical protein FG00854.1 [Gibberella zeae PH-1]	1	4433293	hypothetical protein		2.39121	1	0	0	0	0	0
FVEG_00611	hypothetical protein FG00855.1 [Gibberella zeae PH-1]	1	4435580	hypothetical protein		6.57184	6	0	0	0	0	0
FVEG_00610	putative histidine kinase HHK13p [Gibberella moniliformis]	1	4441127	hypothetical protein		0	1	0	0	0	0	0
FVEG_00608	hypothetical protein FG00935.1 [Gibberella zeae PH-1]	1	4449104	hypothetical protein		5.19182	6	0	0	0	0	0
FVEG_00609	hypothetical protein FG00934.1 [Gibberella zeae PH-1]	1	4449157	hypothetical protein		0	1	0	0	0	0	0
FVEG_00607	-	1	4454287	hypothetical protein		4.70238	6	0	0	0	0	0
FVEG_00606	RecName: Full=Peptidyl-prolyl cis-trans isomerase-like 3; Short=PPIase; AltName: Full=Rotamase	1	4455883	peptidyl-prolyl cis-trans isomerase 10		6.18971	6	0	0	0	0	0
FVEG_00605	-	1	4456640	hypothetical protein		7.91637	6	0	0	0	0	0
FVEG_00604	hypothetical protein FG00945.1 [Gibberella zeae PH-1]_x0001_sp|Q4IPB3.1|CWC27_GIBZE RecName: Full=Peptidyl-prolyl isomerase CWC27; Short=PPIase CWC27; AltName: Full=Rotamase CWC27	1	4458766	peptidyl-prolyl isomerase CWC27		-8.08709	4	0	0	0	0	0
FVEG_00603	hypothetical protein NECHADRAFT_90281 [Nectria haematococca mpVI 77-13-4]_x0001_gb|EEU48020.1| hypothetical protein NECHADRAFT_90281 [Nectria haematococca mpVI 77-13-4]	1	4461487	hypothetical protein		3.063	3	0	0	0	0	0
FVEG_00602	hypothetical protein FG00941.1 [Gibberella zeae PH-1]	1	4466233	hypothetical protein		0	1	0	0	0	0	0
FVEG_00601	-	1	4478238	hypothetical protein		1.8513	5	0	0	0	0	0
FVEG_00600	-	1	4481913	hypothetical protein		3.91324	6	0	0	0	0	0
FVEG_00599	-	1	4483056	hypothetical protein		3.96052	6	0	0	0	0	0
FVEG_00598	hypothetical protein FG00939.1 [Gibberella zeae PH-1]	1	4487515	hypothetical protein		5.00961	6	0	0	0	0	0
FVEG_00597	hypothetical protein FG00947.1 [Gibberella zeae PH-1]	1	4490383	hypothetical protein		0	1	0	0	0	0	0
FVEG_00596	-	1	4495707	hypothetical protein		4.80348	5	0	0	0	0	0
FVEG_00595	hypothetical protein NECHADRAFT_98907 [Nectria haematococca mpVI 77-13-4]_x0001_gb|EEU48026.1| hypothetical protein NECHADRAFT_98907 [Nectria haematococca mpVI 77-13-4]	1	4497619	hypothetical protein		8.03273	5	0	0	0	0	0
FVEG_00594	hypothetical protein FG00950.1 [Gibberella zeae PH-1]	1	4500853	hypothetical protein		1.9859	2	0	0	0	0	0
FVEG_00593	hypothetical protein FG00951.1 [Gibberella zeae PH-1]	1	4502840	hypothetical protein		13.3469	5	13.3469	3	5	0	0
FVEG_00592	hypothetical protein FG00952.1 [Gibberella zeae PH-1]	1	4505053	hypothetical protein		0	1	13.3469	3	5	0	0
FVEG_00591	hypothetical protein NECHADRAFT_103202 [Nectria haematococca mpVI 77-13-4]_x0001_gb|EEU48028.1| hypothetical protein NECHADRAFT_103202 [Nectria haematococca mpVI 77-13-4]	1	4508557	hypothetical protein		3.44249	3	13.3469	3	5	0	0
FVEG_00590	hypothetical protein FG00954.1 [Gibberella zeae PH-1]_x0001_sp|Q4IPA4.1|YTH1_GIBZE RecName: Full=mRNA 3'-end-processing protein YTH1	1	4510310	mRNA 3'-end-processing protein yth1		3.74684	3	0	0	0	0	0
FVEG_00589	hypothetical protein NECHADRAFT_57560 [Nectria haematococca mpVI 77-13-4]_x0001_gb|EEU48743.1| hypothetical protein NECHADRAFT_57560 [Nectria haematococca mpVI 77-13-4]	1	4511277	hypothetical protein		3.60214	3	0	0	0	0	0
FVEG_00588	hypothetical protein FG00956.1 [Gibberella zeae PH-1]	1	4516470	hypothetical protein		3.44435	6	0	0	0	0	0
FVEG_00587	-	1	4522569	hypothetical protein		3.68316	6	0	0	0	0	0
FVEG_00586	-	1	4525389	hypothetical protein		3.97161	3	0	0	0	0	0
FVEG_00585	hypothetical protein FG00979.1 [Gibberella zeae PH-1]	1	4528747	hypothetical protein		2.38152	5	0	0	0	0	0
FVEG_00584	hypothetical protein FG00977.1 [Gibberella zeae PH-1]	1	4535143	hypothetical protein		-2.16839	4	0	0	0	0	0
FVEG_00583	hypothetical protein FG00957.1 [Gibberella zeae PH-1]	1	4537769	hypothetical protein		13.263	3	0	0	0	0	0
FVEG_00582	hypothetical protein FG00958.1 [Gibberella zeae PH-1]	1	4541292	hypothetical protein		16.7606	3	16.7606	4	3	0	0
FVEG_00581	hypothetical protein NECHADRAFT_103198 [Nectria haematococca mpVI 77-13-4]_x0001_gb|EEU48733.1| hypothetical protein NECHADRAFT_103198 [Nectria haematococca mpVI 77-13-4]	1	4545156	hypothetical protein		8.95898	3	16.7606	4	3	0	0
FVEG_00580	glycosyltransferase family 4 [Nectria haematococca mpVI 77-13-4]_x0001_gb|EEU48017.1| glycosyltransferase family 4 [Nectria haematococca mpVI 77-13-4]	1	4548279	phosphatidylinositol N-acetylglucosaminyltransferase GPI3 subunit		4.68679	5	16.7606	4	3	0	0
FVEG_00579	hypothetical protein NECHADRAFT_90274 [Nectria haematococca mpVI 77-13-4]_x0001_gb|EEU48732.1| hypothetical protein NECHADRAFT_90274 [Nectria haematococca mpVI 77-13-4]	1	4550722	hypothetical protein		5.04914	6	16.7606	4	3	0	0
FVEG_00578	-	1	4554458	hypothetical protein		0	1	0	0	0	0	0
FVEG_00577	hypothetical protein FG00963.1 [Gibberella zeae PH-1]	1	4555997	hypothetical protein		0	1	0	0	0	0	0
FVEG_00576	hypothetical protein FG00964.1 [Gibberella zeae PH-1]	1	4558520	hypothetical protein		14.7934	6	0	0	0	0	0
FVEG_00575	-	1	4559875	hypothetical protein		17.5046	6	0	0	0	0	0
FVEG_00574	hypothetical protein FG00967.1 [Gibberella zeae PH-1]	1	4563214	hypothetical protein		1.8068	2	0	0	0	0	0
FVEG_00573	-	1	4566654	hypothetical protein		15.9291	5	0	0	0	0	0
FVEG_00572	hypothetical protein FG00625.1 [Gibberella zeae PH-1]	1	4568287	hypothetical protein		18.0167	3	0	0	0	0	0
FVEG_00571	-	1	4570122	hypothetical protein		26.7425	5	0	0	0	0	0
FVEG_00570	hypothetical protein FG00627.1 [Gibberella zeae PH-1]	1	4573577	hypothetical protein		27.1921	6	0	0	0	0	0
FVEG_00569	hypothetical protein FG00628.1 [Gibberella zeae PH-1]	1	4577178	hypothetical protein		0	1	0	0	0	0	0
FVEG_00568	hypothetical protein FG00629.1 [Gibberella zeae PH-1]	1	4578169	hypothetical protein		21.3364	5	0	0	0	0	0
FVEG_00567	hypothetical protein FG00630.1 [Gibberella zeae PH-1]	1	4581055	hypothetical protein		22.9693	3	0	0	0	0	0
FVEG_00566	hypothetical protein FG00631.1 [Gibberella zeae PH-1]	1	4584048	40S ribosomal protein S8-A		34.1728	5	0	0	0	0	0
FVEG_00565	hypothetical protein FG00632.1 [Gibberella zeae PH-1]	1	4585302	hypothetical protein		0	1	0	0	0	0	0
FVEG_00564	-	1	4588229	hypothetical protein		26.2268	5	0	0	0	0	0
FVEG_00563	hypothetical protein FG00633.1 [Gibberella zeae PH-1]	1	4592330	hypothetical protein		8.80324	2	0	0	0	0	0
FVEG_00562	predicted protein [Nectria haematococca mpVI 77-13-4]_x0001_gb|EEU48008.1| predicted protein [Nectria haematococca mpVI 77-13-4]	1	4604930	40S ribosomal protein S6-B		16.1807	5	0	0	0	0	0
FVEG_00561	hypothetical protein FG00635.1 [Gibberella zeae PH-1]	1	4606681	hypothetical protein		21.691	3	0	0	0	0	0
FVEG_00560	hypothetical protein FG00636.1 [Gibberella zeae PH-1]_x0001_sp|Q4IQ72.1|DPH1_GIBZE RecName: Full=Diphthamide biosynthesis protein 1	1	4607463	diphthamide biosynthesis protein 1		17.3026	6	0	0	0	0	0
FVEG_00559	VATB_NEUCR Vacuolar ATP synthase subunit B (V-ATPase B subunit) (Vacuolar proton pump B subunit) (V-ATPase 57 kDa subunit) [Gibberella zeae PH-1]	1	4609145	vacuolar ATP synthase subunit B		22.8991	3	0	0	0	0	0
FVEG_00558	hypothetical protein FG00638.1 [Gibberella zeae PH-1]	1	4611486	hypothetical protein		24.2563	3	0	0	0	0	0
FVEG_00557	predicted protein [Nectria haematococca mpVI 77-13-4]_x0001_gb|EEU48004.1| predicted protein [Nectria haematococca mpVI 77-13-4]	1	4613033	tubulin alpha chain		0	1	0	0	0	0	0
FVEG_00556	hypothetical protein FG00640.1 [Gibberella zeae PH-1]	1	4616704	hypothetical protein		46.2895	5	0	0	0	0	0
FVEG_00555	hypothetical protein FG00641.1 [Gibberella zeae PH-1]	1	4617599	hypothetical protein		64.7646	5	64.7646	7	5	0	0
FVEG_00554	hypothetical protein NECHADRAFT_103191 [Nectria haematococca mpVI 77-13-4]_x0001_gb|EEU48002.1| hypothetical protein NECHADRAFT_103191 [Nectria haematococca mpVI 77-13-4]	1	4620632	hypothetical protein		50.8335	5	64.7646	7	5	0	0
FVEG_00553	hypothetical protein FG00643.1 [Gibberella zeae PH-1]	1	4626866	hypothetical protein		31.0602	3	64.7646	7	5	0	0
FVEG_00552	hypothetical protein LOC100273290 [Zea mays]_x0001_gb|ACF85705.1| unknown [Zea mays]	1	4632915	hypothetical protein		28.4706	3	64.7646	7	5	0	0
FVEG_00551	hypothetical protein FG00645.1 [Gibberella zeae PH-1]	1	4635034	hypothetical protein		0	1	64.7646	7	5	0	0
FVEG_00550	predicted protein [Nectria haematococca mpVI 77-13-4]_x0001_gb|EEU48721.1| predicted protein [Nectria haematococca mpVI 77-13-4]	1	4638100	hypothetical protein		18.8162	3	64.7646	7	5	0	0
FVEG_00549	hypothetical protein FG00647.1 [Gibberella zeae PH-1]	1	4641552	hypothetical protein		0	1	64.7646	7	5	0	0
FVEG_00548	hypothetical protein FG00648.1 [Gibberella zeae PH-1]	1	4648482	hypothetical protein		15.2987	1	0	0	0	0	0
FVEG_00547	hypothetical protein FG00649.1 [Gibberella zeae PH-1]	1	4649076	hypothetical protein		17.8688	3	0	0	0	0	0
FVEG_00545	hypothetical protein FG00651.1 [Gibberella zeae PH-1]	1	4652051	hypothetical protein		8.30505	2	0	0	0	0	0
FVEG_00546	hypothetical protein FG00651.1 [Gibberella zeae PH-1]	1	4652785	hypothetical protein		-23.1668	5	0	0	0	0	0
FVEG_00544	hypothetical protein FG00652.1 [Gibberella zeae PH-1]	1	4662400	hypothetical protein		32.4426	1	0	0	0	0	0
FVEG_00543	hypothetical protein FG00653.1 [Gibberella zeae PH-1]	1	4663356	hypothetical protein		0	1	0	0	0	0	0
FVEG_00542	hypothetical protein FG00654.1 [Gibberella zeae PH-1]	1	4665116	hypothetical protein		14.2747	1	0	0	0	0	0
FVEG_00541	hypothetical protein FG00655.1 [Gibberella zeae PH-1]	1	4668176	hypothetical protein		-30.9407	5	0	0	0	0	0
FVEG_00540	hypothetical protein FG00656.1 [Gibberella zeae PH-1]	1	4669896	hypothetical protein		18.5969	3	0	0	0	0	0
FVEG_00539	methyl transferase [Gibberella fujikuroi]	1	4672758	hypothetical protein		-34.3823	5	0	0	0	0	0
FVEG_00538	hypothetical protein NECHADRAFT_75297 [Nectria haematococca mpVI 77-13-4]_x0001_gb|EEU48791.1| hypothetical protein NECHADRAFT_75297 [Nectria haematococca mpVI 77-13-4]	1	4681618	hypothetical protein		-45.6988	5	0	0	0	0	0
FVEG_00537	hypothetical protein FG00659.1 [Gibberella zeae PH-1]	1	4684974	hypothetical protein		24.6014	6	0	0	0	0	0
FVEG_00536	predicted protein [Nectria haematococca mpVI 77-13-4]_x0001_gb|EEU48793.1| predicted protein [Nectria haematococca mpVI 77-13-4]	1	4689345	WD repeat-containing protein slp1		-7.57391	4	0	0	0	0	0
FVEG_00535	hypothetical protein FG00661.1 [Gibberella zeae PH-1]	1	4692201	hypothetical protein		-5.95152	4	0	0	0	0	0
FVEG_00534	hypothetical protein FG00662.1 [Gibberella zeae PH-1]	1	4696264	hypothetical protein		-1752.07	5	1752.07	3	5	0	0
FVEG_00533	-	1	4704512	hypothetical protein		-3.28009	4	1752.07	3	5	0	0
FVEG_00532	hypothetical protein FG00663.1 [Gibberella zeae PH-1]	1	4708100	hypothetical protein		16.7219	1	1752.07	3	5	0	0
FVEG_00531	hypothetical protein NECHADRAFT_75303 [Nectria haematococca mpVI 77-13-4]_x0001_gb|EEU48795.1| hypothetical protein NECHADRAFT_75303 [Nectria haematococca mpVI 77-13-4]	1	4709666	hypothetical protein		12.9829	2	0	0	0	0	0
FVEG_00530	hypothetical protein FG00665.1 [Gibberella zeae PH-1]	1	4712526	hypothetical protein		0	1	0	0	0	0	0
FVEG_00529	hypothetical protein FG00666.1 [Gibberella zeae PH-1]	1	4715491	hypothetical protein		0.408577	5	0	0	0	0	0
FVEG_00528	ABC1 domain containing protein [Metarhizium acridum CQMa 102]	1	4719203	hypothetical protein		1.41126	3	0	0	0	0	0
FVEG_00527	hypothetical protein FG00667.1 [Gibberella zeae PH-1]	1	4720275	hypothetical protein		8.20244	2	0	0	0	0	0
FVEG_00526	hypothetical protein NECHADRAFT_33619 [Nectria haematococca mpVI 77-13-4]_x0001_gb|EEU40650.1| hypothetical protein NECHADRAFT_33619 [Nectria haematococca mpVI 77-13-4]	1	4725020	hypothetical protein		3.82038	4	0	0	0	0	0
FVEG_00525	hypothetical protein NECHADRAFT_90701 [Nectria haematococca mpVI 77-13-4]_x0001_gb|EEU40649.1| hypothetical protein NECHADRAFT_90701 [Nectria haematococca mpVI 77-13-4]	1	4727856	arylsulfatase		10.0866	2	0	0	0	0	0
FVEG_00524	hypothetical protein FG00669.1 [Gibberella zeae PH-1]	1	4729662	hypothetical protein		13.4212	2	0	0	0	0	0
FVEG_00523	hypothetical protein NECHADRAFT_76006 [Nectria haematococca mpVI 77-13-4]_x0001_gb|EEU40080.1| hypothetical protein NECHADRAFT_76006 [Nectria haematococca mpVI 77-13-4]	1	4737794	hypothetical protein		26.3383	4	26.3383	3	4	0	0
FVEG_00522	hypothetical protein FG00680.1 [Gibberella zeae PH-1]	1	4739676	hypothetical protein		0	1	26.3383	3	4	0	0
FVEG_00521	hypothetical protein NECHADRAFT_30705 [Nectria haematococca mpVI 77-13-4]_x0001_gb|EEU48798.1| hypothetical protein NECHADRAFT_30705 [Nectria haematococca mpVI 77-13-4]	1	4743368	hypothetical protein		0	1	26.3383	3	4	0	0
FVEG_00520	hypothetical protein FG00679.1 [Gibberella zeae PH-1]	1	4744730	hypothetical protein		16.2295	2	0	0	0	0	0
FVEG_00519	hypothetical protein FG00678.1 [Gibberella zeae PH-1]	1	4747389	hypothetical protein		7.88107	3	0	0	0	0	0
FVEG_00518	KC2A_NEUCR Casein kinase II, alpha chain (CK II alpha subunit) [Gibberella zeae PH-1]	1	4750227	casein kinase II subunit alpha		14.8038	2	0	0	0	0	0
FVEG_00517	hypothetical protein NECHADRAFT_75314 [Nectria haematococca mpVI 77-13-4]_x0001_gb|EEU48800.1| hypothetical protein NECHADRAFT_75314 [Nectria haematococca mpVI 77-13-4]	1	4752622	hypothetical protein		14.9871	2	0	0	0	0	0
FVEG_00516	hypothetical protein FG00675.1 [Gibberella zeae PH-1]	1	4755097	hypothetical protein		0	1	0	0	0	0	0
FVEG_00515	hypothetical protein FG00670.1 [Gibberella zeae PH-1]	1	4757452	hypothetical protein		6.47919	3	0	0	0	0	0
FVEG_00514	40S ribosomal protein S11 [Metarhizium acridum CQMa 102]	1	4758701	40S ribosomal protein S11		11.5819	2	0	0	0	0	0
FVEG_00513	hypothetical protein FG00672.1 [Gibberella zeae PH-1]	1	4760621	hypothetical protein		8.64329	4	0	0	0	0	0
FVEG_00512	-	1	4766803	hypothetical protein		10.7537	2	0	0	0	0	0
FVEG_00511	-	1	4768512	hypothetical protein		0	1	0	0	0	0	0
FVEG_00510	hypothetical protein FG00681.1 [Gibberella zeae PH-1]	1	4770250	hypothetical protein		10.0474	1	0	0	0	0	0
FVEG_00509	hypothetical protein FG00682.1 [Gibberella zeae PH-1]	1	4771654	hypothetical protein		0	1	0	0	0	0	0
FVEG_00508	hypothetical protein FG00683.1 [Gibberella zeae PH-1]	1	4774078	hypothetical protein		9.69877	1	0	0	0	0	0
FVEG_00506	hypothetical protein FG00684.1 [Gibberella zeae PH-1]	1	4776110	folylpolyglutamate synthase		12.4147	3	0	0	0	0	0
FVEG_00507	predicted protein [Nectria haematococca mpVI 77-13-4]_x0001_gb|EEU48804.1| predicted protein [Nectria haematococca mpVI 77-13-4]	1	4777525	hypothetical protein		14.2298	3	0	0	0	0	0
FVEG_00505	hypothetical protein FG00686.1 [Gibberella zeae PH-1]	1	4779378	hypothetical protein		0	1	0	0	0	0	0
FVEG_00504	predicted protein [Nectria haematococca mpVI 77-13-4]_x0001_gb|EEU48807.1| predicted protein [Nectria haematococca mpVI 77-13-4]	1	4782321	hypothetical protein		15.5519	5	0	0	0	0	0
FVEG_00503	hypothetical protein FG00688.1 [Gibberella zeae PH-1]	1	4784440	hypothetical protein		17.905	5	0	0	0	0	0
FVEG_00502	hypothetical protein FG00689.1 [Gibberella zeae PH-1]	1	4787967	hypothetical protein		17.0045	3	0	0	0	0	0
FVEG_00501	hypothetical protein FG00690.1 [Gibberella zeae PH-1]	1	4792385	hypothetical protein		-5.83013	4	0	0	0	0	0
FVEG_00500	hypothetical protein FG00691.1 [Gibberella zeae PH-1]	1	4795672	hypothetical protein		12.9095	3	0	0	0	0	0
FVEG_00499	-	1	4810343	hypothetical protein		22.4518	5	0	0	0	0	0
FVEG_00498	hypothetical protein FG00693.1 [Gibberella zeae PH-1]	1	4813779	hypothetical protein		28.1835	3	0	0	0	0	0
FVEG_00497	hypothetical protein FG00694.1 [Gibberella zeae PH-1]	1	4815592	hypothetical protein		49.535	3	49.535	4	3	0	0
FVEG_00496	hypothetical protein FG00695.1 [Gibberella zeae PH-1]	1	4817443	hypothetical protein		45.1901	5	49.535	4	3	0	0
FVEG_00495	hypothetical protein FG00696.1 [Gibberella zeae PH-1]	1	4819745	hypothetical protein		45.5949	5	49.535	4	3	0	0
FVEG_00494	hypothetical protein FG00697.1 [Gibberella zeae PH-1]	1	4822171	hypothetical protein		0	1	49.535	4	3	0	0
FVEG_00493	hypothetical protein NECHADRAFT_98953 [Nectria haematococca mpVI 77-13-4]_x0001_gb|EEU48812.1| hypothetical protein NECHADRAFT_98953 [Nectria haematococca mpVI 77-13-4]	1	4826711	hypothetical protein		0	1	0	0	0	0	0
FVEG_00492	hypothetical protein FG00698.1 [Gibberella zeae PH-1]	1	4828719	hypothetical protein		9.9721	6	0	0	0	0	0
FVEG_00491	hypothetical protein FG00699.1 [Gibberella zeae PH-1]	1	4830319	hypothetical protein		66.3489	5	0	0	0	0	0
FVEG_00490	hypothetical protein FG00699.1 [Gibberella zeae PH-1]	1	4835034	hypothetical protein		0	1	0	0	0	0	0
FVEG_00489	-	1	4843690	hypothetical protein		86.9269	5	86.9269	3	5	0	0
FVEG_00488	hypothetical protein FG00702.1 [Gibberella zeae PH-1]	1	4853616	hypothetical protein		1.32356	1	86.9269	3	5	0	0
FVEG_00487	-	1	4861232	hypothetical protein		-7.32326	4	86.9269	3	5	0	0
FVEG_00486	-	1	4866142	hypothetical protein		-8.2186	4	0	0	0	0	0
FVEG_00485	hypothetical protein FG00703.1 [Gibberella zeae PH-1]	1	4867654	hypothetical protein		0	1	0	0	0	0	0
FVEG_00484	hypothetical protein FG00704.1 [Gibberella zeae PH-1]	1	4870351	hypothetical protein		-11.1693	4	0	0	0	0	0
FVEG_00483	hypothetical protein FG00705.1 [Gibberella zeae PH-1]	1	4872209	hypothetical protein		-4.46085	5	0	0	0	0	0
FVEG_00482	hypothetical protein FG00706.1 [Gibberella zeae PH-1]	1	4875160	hypothetical protein		-5.33222	5	0	0	0	0	0
FVEG_00481	hypothetical protein FG00707.1 [Gibberella zeae PH-1]	1	4878050	hypothetical protein		-7.29588	4	0	0	0	0	0
FVEG_00480	hypothetical protein FG00708.1 [Gibberella zeae PH-1]	1	4881334	hypothetical protein		-12.83	5	0	0	0	0	0
FVEG_00479	hypothetical protein FG00709.1 [Gibberella zeae PH-1]	1	4882607	hypothetical protein		-7.73877	4	0	0	0	0	0
FVEG_00478	white-collar 2 [Gibberella moniliformis]	1	4885256	cutinase gene palindrome-binding protein		13.1256	1	0	0	0	0	0
FVEG_00477	hypothetical protein FG00711.1 [Gibberella zeae PH-1]	1	4890033	hypothetical protein		0	1	0	0	0	0	0
FVEG_00476	hypothetical protein FG00711.1 [Gibberella zeae PH-1]	1	4895007	hypothetical protein		10.631	1	0	0	0	0	0
FVEG_00475	hypothetical protein FG00712.1 [Gibberella zeae PH-1]	1	4897422	hypothetical protein		24.0073	1	24.0073	3	1	0	0
FVEG_00474	-	1	4899497	hypothetical protein		-6.47725	4	24.0073	3	1	0	0
FVEG_00473	hypothetical protein NECHADRAFT_30904 [Nectria haematococca mpVI 77-13-4]_x0001_gb|EEU48107.1| hypothetical protein NECHADRAFT_30904 [Nectria haematococca mpVI 77-13-4]	1	4900825	hypothetical protein		-6.66853	4	24.0073	3	1	0	0
FVEG_00472	hypothetical protein FG00714.1 [Gibberella zeae PH-1]	1	4904716	hypothetical protein		5.97567	6	0	0	0	0	0
FVEG_00471	hypothetical protein FG00715.1 [Gibberella zeae PH-1]	1	4907116	hypothetical protein		7.69163	5	0	0	0	0	0
FVEG_00470	hypothetical protein FG00716.1 [Gibberella zeae PH-1]	1	4909576	hypothetical protein		0	1	0	0	0	0	0
FVEG_00469	hypothetical protein FG00717.1 [Gibberella zeae PH-1]_x0001_sp|Q4IPZ1.1|TIM10_GIBZE RecName: Full=Mitochondrial import inner membrane translocase subunit TIM10	1	4912747	mitochondrial import inner membrane translocase subunit tim10		5.90567	6	0	0	0	0	0
FVEG_00468	hypothetical protein FG00718.1 [Gibberella zeae PH-1]	1	4913474	hypothetical protein		-5.52226	4	0	0	0	0	0
FVEG_00467	-	1	4917562	hypothetical protein		0	1	0	0	0	0	0
FVEG_00466	predicted protein [Nectria haematococca mpVI 77-13-4]_x0001_gb|EEU48110.1| predicted protein [Nectria haematococca mpVI 77-13-4]	1	4918933	hypothetical protein		4.48473	6	0	0	0	0	0
FVEG_00465	-	1	4925869	hypothetical protein		0	1	0	0	0	0	0
FVEG_00464	hypothetical protein NECHADRAFT_98962 [Nectria haematococca mpVI 77-13-4]_x0001_gb|EEU48111.1| hypothetical protein NECHADRAFT_98962 [Nectria haematococca mpVI 77-13-4]	1	4929878	hypothetical protein		7.8658	6	0	0	0	0	0
FVEG_00463	hypothetical protein FG00721.1 [Gibberella zeae PH-1]	1	4934507	hypothetical protein		0	1	0	0	0	0	0
FVEG_00462	hypothetical protein FG00722.1 [Gibberella zeae PH-1]	1	4938138	adenine phosphoribosyltransferase		-10.8757	4	0	0	0	0	0
FVEG_00461	hypothetical protein FG00723.1 [Gibberella zeae PH-1]	1	4945341	hypothetical protein		3.69527	1	0	0	0	0	0
FVEG_00460	hypothetical protein FG00724.1 [Gibberella zeae PH-1]	1	4947839	peroxisomal biogenesis factor 2		0	1	0	0	0	0	0
FVEG_00459	-	1	4952331	hypothetical protein		-10.5017	4	0	0	0	0	0
FVEG_00458	hypothetical protein FG00726.1 [Gibberella zeae PH-1]	1	4954247	hypothetical protein		-22.9674	4	0	0	0	0	0
FVEG_00457	hypothetical protein FG00727.1 [Gibberella zeae PH-1]	1	4956616	hypothetical protein		-21.9313	4	0	0	0	0	0
FVEG_00456	hypothetical protein FG00728.1 [Gibberella zeae PH-1]	1	4962916	hypothetical protein		7.75739	3	0	0	0	0	0
FVEG_00455	-	1	4966665	hypothetical protein		7.41391	3	0	0	0	0	0
FVEG_00454	hypothetical protein FG00729.1 [Gibberella zeae PH-1]	1	4969791	hypothetical protein		0	1	0	0	0	0	0
FVEG_00453	-	1	4972351	hypothetical protein		8.42875	2	0	0	0	0	0
FVEG_00452	hypothetical protein FG00730.1 [Gibberella zeae PH-1]_x0001_sp|Q4IPX8.1|SYM1_GIBZE RecName: Full=Protein SYM1	1	4973843	protein sym-1		2.23564	6	0	0	0	0	0
FVEG_00451	hypothetical protein FG00731.1 [Gibberella zeae PH-1]	1	4975719	hypothetical protein		9.57194	2	0	0	0	0	0
FVEG_00450	hypothetical protein FG00732.1 [Gibberella zeae PH-1]	1	4977585	N-acetyltransferase 10		0	1	0	0	0	0	0
FVEG_00449	hypothetical protein FG00733.1 [Gibberella zeae PH-1]	1	4981362	hypothetical protein		2.7475	5	0	0	0	0	0
FVEG_00448	predicted protein [Nectria haematococca mpVI 77-13-4]_x0001_gb|EEU48031.1| predicted protein [Nectria haematococca mpVI 77-13-4]	1	4984570	hypothetical protein		27.1678	6	0	0	0	0	0
FVEG_00446	putative histidine kinase HHK6p [Gibberella moniliformis]	1	4990345	hypothetical protein		-33.564	2	33.564	3	2	0	0
FVEG_00445	hypothetical protein NECHADRAFT_98912 [Nectria haematococca mpVI 77-13-4]_x0001_gb|EEU48744.1| hypothetical protein NECHADRAFT_98912 [Nectria haematococca mpVI 77-13-4]	1	4995424	hypothetical protein		14.3881	6	33.564	3	2	0	0
FVEG_00444	hypothetical protein FG00739.1 [Gibberella zeae PH-1]	1	5002460	hypothetical protein		-1.12324	5	33.564	3	2	0	0
FVEG_00443	hypothetical protein FG00740.1 [Gibberella zeae PH-1]	1	5004348	urease		4.76628	1	0	0	0	0	0
FVEG_00442	hypothetical protein FG00741.1 [Gibberella zeae PH-1]	1	5007731	hypothetical protein		16.2036	2	16.2036	17	2	0	0
FVEG_00441	hypothetical protein FG00742.1 [Gibberella zeae PH-1]	1	5011973	hypothetical protein		7.82777	1	16.2036	17	2	0	0
FVEG_00440	hypothetical protein FG00743.1 [Gibberella zeae PH-1]	1	5014859	hypothetical protein		14.0196	2	16.2036	17	2	0	0
FVEG_00439	hypothetical protein FG00744.1 [Gibberella zeae PH-1]	1	5016155	tyrosyl-tRNA synthetase, mitochondrial precursor		4.92169	3	16.2036	17	2	0	0
FVEG_00438	hypothetical protein FG00745.1 [Gibberella zeae PH-1]	1	5018242	hypothetical protein		4.38022	5	16.2036	17	2	0	0
FVEG_00437	hypothetical protein FG00746.1 [Gibberella zeae PH-1]	1	5020656	hypothetical protein		4.35609	2	16.2036	17	2	0	0
FVEG_00436	hypothetical protein FG00747.1 [Gibberella zeae PH-1]	1	5022786	hypothetical protein		5.1799	2	16.2036	17	2	0	0
FVEG_00435	hypothetical protein FG00748.1 [Gibberella zeae PH-1]	1	5024157	hypothetical protein		6.75772	2	16.2036	17	2	0	0
FVEG_00434	hypothetical protein NECHADRAFT_31483 [Nectria haematococca mpVI 77-13-4]_x0001_gb|EEU48120.1| hypothetical protein NECHADRAFT_31483 [Nectria haematococca mpVI 77-13-4]	1	5028142	hypothetical protein		-1.54717	4	16.2036	17	2	0	0
FVEG_00433	hypothetical protein NECHADRAFT_75378 [Nectria haematococca mpVI 77-13-4]_x0001_gb|EEU48835.1| hypothetical protein NECHADRAFT_75378 [Nectria haematococca mpVI 77-13-4]	1	5029643	hypothetical protein		-7.46819	5	16.2036	17	2	0	0
FVEG_00432	hypothetical protein FG00751.1 [Gibberella zeae PH-1]	1	5031094	hypothetical protein		6.15684	2	16.2036	17	2	0	0
FVEG_00431	hypothetical protein FG00752.1 [Gibberella zeae PH-1]	1	5032697	hypothetical protein		-5.6136	5	16.2036	17	2	0	0
FVEG_00430	hypothetical protein FG00753.1 [Gibberella zeae PH-1]	1	5034964	hypothetical protein		-7.34369	5	16.2036	17	2	0	0
FVEG_00429	hypothetical protein FG00754.1 [Gibberella zeae PH-1]	1	5037620	hypothetical protein		4.5395	2	16.2036	17	2	0	0
FVEG_00428	hypothetical protein NECHADRAFT_57655 [Nectria haematococca mpVI 77-13-4]_x0001_gb|EEU48122.1| hypothetical protein NECHADRAFT_57655 [Nectria haematococca mpVI 77-13-4]	1	5041251	hypothetical protein		8.14022	2	16.2036	17	2	0	0
FVEG_00427	hypothetical protein NECHADRAFT_75761 [Nectria haematococca mpVI 77-13-4]_x0001_gb|EEU49017.1| hypothetical protein NECHADRAFT_75761 [Nectria haematococca mpVI 77-13-4]	1	5045403	hypothetical protein		0	1	16.2036	17	2	0	0
FVEG_00426	-	1	5048587	hypothetical protein		2.09789	6	16.2036	17	2	0	0
FVEG_00425	hypothetical protein NECHADRAFT_75383 [Nectria haematococca mpVI 77-13-4]_x0001_gb|EEU48123.1| hypothetical protein NECHADRAFT_75383 [Nectria haematococca mpVI 77-13-4]	1	5050314	hypothetical protein		-22.2478	2	22.2478	6	2	0	0
FVEG_00424	hypothetical protein FG00755.1 [Gibberella zeae PH-1]	1	5053143	hypothetical protein		-3.78311	4	22.2478	6	2	0	0
FVEG_00423	heat shock protein STI1 [Metarhizium anisopliae ARSEF 23]	1	5055651	hypothetical protein		-9.45807	2	22.2478	6	2	0	0
FVEG_00421	-	1	5063697	hypothetical protein		0	1	22.2478	6	2	0	0
FVEG_00422	hypothetical protein FG00764.1 [Gibberella zeae PH-1]	1	5065839	hypothetical protein		-3.70189	4	22.2478	6	2	0	0
FVEG_00420	hypothetical protein FG00763.1 [Gibberella zeae PH-1]	1	5067332	hypothetical protein		0	1	22.2478	6	2	0	0
FVEG_00418	putative glutathione S-transferase [Gibberella fujikuroi]	1	5069120	hypothetical protein		2.97807	3	0	0	0	0	0
FVEG_00417	hypothetical protein FG00761.1 [Gibberella zeae PH-1]	1	5071747	hypothetical protein		3.81203	1	0	0	0	0	0
FVEG_00416	hypothetical protein FG00759.1 [Gibberella zeae PH-1]	1	5073541	hypothetical protein		0	1	0	0	0	0	0
FVEG_00415	hypothetical protein NECHADRAFT_75387 [Nectria haematococca mpVI 77-13-4]_x0001_gb|EEU48837.1| hypothetical protein NECHADRAFT_75387 [Nectria haematococca mpVI 77-13-4]	1	5075720	hypothetical protein		2.99227	1	0	0	0	0	0
FVEG_00414	hypothetical protein FG00758.1 [Gibberella zeae PH-1]	1	5077760	hypothetical protein		3.45277	6	0	0	0	0	0
FVEG_00413	hypothetical protein FG00756.1 [Gibberella zeae PH-1]	1	5080073	hypothetical protein		5.54793	5	0	0	0	0	0
FVEG_00412	hypothetical protein FG00767.1 [Gibberella zeae PH-1]	1	5081212	hypothetical protein		3.09088	3	0	0	0	0	0
FVEG_00411	predicted protein [Nectria haematococca mpVI 77-13-4]_x0001_gb|EEU48130.1| predicted protein [Nectria haematococca mpVI 77-13-4]	1	5085129	hypothetical protein		3.35561	1	0	0	0	0	0
FVEG_00410	predicted protein [Nectria haematococca mpVI 77-13-4]_x0001_gb|EEU48131.1| predicted protein [Nectria haematococca mpVI 77-13-4]	1	5087171	hypothetical protein		2.89499	1	0	0	0	0	0
FVEG_00409	hypothetical protein FG00771.1 [Gibberella zeae PH-1]	1	5090960	hypothetical protein		0	1	0	0	0	0	0
FVEG_00408	-	1	5092703	hypothetical protein		16.3311	5	0	0	0	0	0
FVEG_00407	-	1	5094878	hypothetical protein		22.2344	5	0	0	0	0	0
FVEG_00406	hypothetical protein FG00774.1 [Gibberella zeae PH-1]	1	5096322	hypothetical protein		24.6167	5	0	0	0	0	0
FVEG_00405	hypothetical protein FG00775.1 [Gibberella zeae PH-1]	1	5098786	hypothetical protein		28.4305	5	0	0	0	0	0
FVEG_00404	hypothetical protein NECHADRAFT_98981 [Nectria haematococca mpVI 77-13-4]_x0001_gb|EEU48843.1| hypothetical protein NECHADRAFT_98981 [Nectria haematococca mpVI 77-13-4]	1	5100637	hypothetical protein		0	1	0	0	0	0	0
FVEG_00403	peptidylprolyl isomerase (EC 5.2.1.8) A precursor, mitochondrial - cyclosporin fungus_x0001_emb|CAA88041.1| cyclophilin, mitochondrial form [Tolypocladium inflatum]	1	5104622	peptidyl-prolyl cis-trans isomerase		25.9432	5	0	0	0	0	0
FVEG_00402	hypothetical protein FG00778.1 [Gibberella zeae PH-1]	1	5106072	hypothetical protein		0	1	0	0	0	0	0
FVEG_00401	-	1	5108482	hypothetical protein		26.2612	5	0	0	0	0	0
FVEG_00400	hypothetical protein FG00780.1 [Gibberella zeae PH-1]	1	5109202	histone deacetylase RPD3		0	1	0	0	0	0	0
FVEG_00399	hypothetical protein FG00781.1 [Gibberella zeae PH-1]	1	5112143	hypothetical protein		29.5516	5	0	0	0	0	0
FVEG_00398	hypothetical protein FG00782.1 [Gibberella zeae PH-1]	1	5114624	hypothetical protein		0	1	0	0	0	0	0
FVEG_00397	hypothetical protein FG00783.1 [Gibberella zeae PH-1]	1	5115733	hypothetical protein		0	1	0	0	0	0	0
FVEG_00396	hypothetical protein NECHADRAFT_105849 [Nectria haematococca mpVI 77-13-4]_x0001_gb|EEU48847.1| hypothetical protein NECHADRAFT_105849 [Nectria haematococca mpVI 77-13-4]	1	5117582	hypothetical protein		39.4006	5	0	0	0	0	0
FVEG_00395	hypothetical protein FG00785.1 [Gibberella zeae PH-1]	1	5119142	hypothetical protein		39.9694	5	0	0	0	0	0
FVEG_00394	hypothetical protein FG00786.1 [Gibberella zeae PH-1]	1	5120551	hypothetical protein		49.7565	5	0	0	0	0	0
FVEG_00393	hypothetical protein FG00787.1 [Gibberella zeae PH-1]	1	5127406	hypothetical protein		61.3863	5	0	0	0	0	0
FVEG_00392	hypothetical protein FG08002.1 [Gibberella zeae PH-1]	1	5132983	hypothetical protein		78.2995	5	0	0	0	0	0
FVEG_00391	hypothetical protein FG00789.1 [Gibberella zeae PH-1]	1	5136704	hypothetical protein		-6.68884	2	0	0	0	0	0
FVEG_00390	hypothetical protein FG00790.1 [Gibberella zeae PH-1]	1	5138521	hypothetical protein		37.7452	6	0	0	0	0	0
FVEG_00389	hypothetical protein FG00791.1 [Gibberella zeae PH-1]	1	5139827	hypothetical protein		299.359	5	299.359	4	5	0	0
FVEG_00388	hypothetical protein FG00791.1 [Gibberella zeae PH-1]	1	5143102	hypothetical protein		40.3398	6	299.359	4	5	0	0
FVEG_00387	hypothetical protein FG00792.1 [Gibberella zeae PH-1]	1	5146073	hypothetical protein		5.25238	3	299.359	4	5	0	0
FVEG_00386	hypothetical protein FG00793.1 [Gibberella zeae PH-1]	1	5149167	hypothetical protein		7.21605	3	299.359	4	5	0	0
FVEG_00385	predicted protein [Nectria haematococca mpVI 77-13-4]_x0001_gb|EEU48144.1| predicted protein [Nectria haematococca mpVI 77-13-4]	1	5151452	hypothetical protein		13.7745	5	0	0	0	0	0
FVEG_00384	hypothetical protein FG00795.1 [Gibberella zeae PH-1]	1	5155837	hypothetical protein		12.5767	5	0	0	0	0	0
FVEG_00383	hypothetical protein FG00796.1 [Gibberella zeae PH-1]	1	5165129	hypothetical protein		5.37613	6	0	0	0	0	0
FVEG_00382	photolyase [Fusarium oxysporum]	1	5168181	deoxyribodipyrimidine photo-lyase		0	1	0	0	0	0	0
FVEG_00381	RS21_NEUCR 40S ribosomal protein S21 (CRP7) [Gibberella zeae PH-1]	1	5170532	40S ribosomal protein S21		15.3885	5	0	0	0	0	0
FVEG_00380	hypothetical protein FG00799.1 [Gibberella zeae PH-1]	1	5171720	hypothetical protein		23.668	5	23.668	6	5	0	0
FVEG_00379	hypothetical protein FG00800.1 [Gibberella zeae PH-1]	1	5178568	hypothetical protein		18.4314	5	23.668	6	5	0	0
FVEG_00377	hypothetical protein NECHADRAFT_75434 [Nectria haematococca mpVI 77-13-4]_x0001_gb|EEU48859.1| hypothetical protein NECHADRAFT_75434 [Nectria haematococca mpVI 77-13-4]	1	5183534	hypothetical protein		2.40633	6	23.668	6	5	0	0
FVEG_00376	hypothetical protein FG00802.1 [Gibberella zeae PH-1]	1	5185929	hypothetical protein		-5.31434	4	23.668	6	5	0	0
FVEG_00375	hypothetical protein FG00803.1 [Gibberella zeae PH-1]	1	5188426	hypothetical protein		0	1	23.668	6	5	0	0
FVEG_00374	hypothetical protein FG00804.1 [Gibberella zeae PH-1]	1	5194238	hypothetical protein		-4.81189	5	23.668	6	5	0	0
FVEG_00373	hypothetical protein FG00805.1 [Gibberella zeae PH-1]	1	5195148	hypothetical protein		3.32726	6	0	0	0	0	0
FVEG_00372	hypothetical protein NECHADRAFT_90426 [Nectria haematococca mpVI 77-13-4]_x0001_gb|EEU48862.1| hypothetical protein NECHADRAFT_90426 [Nectria haematococca mpVI 77-13-4]	1	5199326	hypothetical protein		0	1	0	0	0	0	0
FVEG_00371	hypothetical protein FG06095.1 [Gibberella zeae PH-1]	1	5202473	hypothetical protein		2.61238	5	0	0	0	0	0
FVEG_00370	hypothetical protein FG00806.1 [Gibberella zeae PH-1]	1	5204612	alkaline proteinase precursor		1.58451	1	0	0	0	0	0
FVEG_00369	hypothetical protein NECHADRAFT_75442 [Nectria haematococca mpVI 77-13-4]_x0001_gb|EEU48865.1| hypothetical protein NECHADRAFT_75442 [Nectria haematococca mpVI 77-13-4]	1	5211329	hypothetical protein		8.25358	6	0	0	0	0	0
FVEG_00368	hypothetical protein FG00807.1 [Gibberella zeae PH-1]	1	5212458	hypothetical protein		0	1	0	0	0	0	0
FVEG_00367	hypothetical protein FG00808.1 [Gibberella zeae PH-1]	1	5215685	hypothetical protein		8.64966	6	0	0	0	0	0
FVEG_00366	hypothetical protein FG11054.1 [Gibberella zeae PH-1]	1	5218311	homocitrate synthase		4.90732	5	0	0	0	0	0
FVEG_00365	hypothetical protein FG00809.1 [Gibberella zeae PH-1]	1	5220209	hypothetical protein		-7.10069	4	0	0	0	0	0
FVEG_00364	hypothetical protein FG00810.1 [Gibberella zeae PH-1]	1	5221582	hypothetical protein		11.6595	6	0	0	0	0	0
FVEG_00363	hypothetical protein FG00811.1 [Gibberella zeae PH-1]	1	5225752	hypothetical protein		12.8946	6	0	0	0	0	0
FVEG_00362	hypothetical protein FG00813.1 [Gibberella zeae PH-1]	1	5230999	hypothetical protein		11.1453	5	0	0	0	0	0
FVEG_00361	hypothetical protein FG00814.1 [Gibberella zeae PH-1]	1	5232737	hypothetical protein		10.3575	6	0	0	0	0	0
FVEG_00360	hypothetical protein FG00815.1 [Gibberella zeae PH-1]	1	5234565	peptide methionine sulfoxide reductase msrA 1		13.4329	5	0	0	0	0	0
FVEG_00359	hypothetical protein FG00816.1 [Gibberella zeae PH-1]	1	5235503	hypothetical protein		14.4653	6	0	0	0	0	0
FVEG_00358	hypothetical protein FG00816.1 [Gibberella zeae PH-1]	1	5237430	hypothetical protein		0	1	0	0	0	0	0
FVEG_00357	-	1	5240327	hypothetical protein		24.4425	5	0	0	0	0	0
FVEG_00356	-	1	5244097	hypothetical protein		30.7455	5	0	0	0	0	0
FVEG_00355	-	1	5246226	hypothetical protein		37.3063	5	0	0	0	0	0
FVEG_00354	hypothetical protein FG00296.1 [Gibberella zeae PH-1]	1	5252665	threonine dehydratase, mitochondrial precursor		50.2958	5	0	0	0	0	0
FVEG_00353	hypothetical protein FG00295.1 [Gibberella zeae PH-1]	1	5255053	hypothetical protein		77.3591	5	0	0	0	0	0
FVEG_00352	hypothetical protein FG00294.1 [Gibberella zeae PH-1]	1	5256172	hypothetical protein		68.9491	5	0	0	0	0	0
FVEG_00351	hypothetical protein FG00293.1 [Gibberella zeae PH-1]	1	5259516	hypothetical protein		-78.0228	2	0	0	0	0	0
FVEG_00350	hypothetical protein FG00292.1 [Gibberella zeae PH-1]	1	5263146	hypothetical protein		16.1043	5	0	0	0	0	0
FVEG_00349	predicted protein [Nectria haematococca mpVI 77-13-4]_x0001_gb|EEU48162.1| predicted protein [Nectria haematococca mpVI 77-13-4]	1	5265789	hypothetical protein		-268.73	2	0	0	0	0	0
FVEG_00348	hypothetical protein FG00290.1 [Gibberella zeae PH-1]	1	5267092	hypothetical protein		-26.986	3	0	0	0	0	0
FVEG_00347	hypothetical protein FG00290.1 [Gibberella zeae PH-1]	1	5268562	hypothetical protein		-72.2737	1	0	0	0	0	0
FVEG_00346	hypothetical protein FG00289.1 [Gibberella zeae PH-1]	1	5277700	hypothetical protein		0	1	0	0	0	0	0
FVEG_00345	hypothetical protein FG00288.1 [Gibberella zeae PH-1]	1	5280759	hypothetical protein		-1401.53	2	0	0	0	0	0
FVEG_00344	hypothetical protein FG00287.1 [Gibberella zeae PH-1]	1	5283913	hypothetical protein		-1716.98	2	0	0	0	0	0
FVEG_00343	predicted protein [Nectria haematococca mpVI 77-13-4]_x0001_gb|EEU48876.1| predicted protein [Nectria haematococca mpVI 77-13-4]	1	5285921	eukaryotic translation initiation factor 4E-1		-15.6647	4	0	0	0	0	0
FVEG_00342	hypothetical protein FG00285.1 [Gibberella zeae PH-1]	1	5289006	hypothetical protein		-337.385	1	0	0	0	0	0
FVEG_00341	hypothetical protein FG00284.1 [Gibberella zeae PH-1]	1	5293843	hypothetical protein		0	1	0	0	0	0	0
FVEG_00340	hypothetical protein FG00283.1 [Gibberella zeae PH-1]	1	5300086	hypothetical protein		0	1	0	0	0	0	0
FVEG_00339	-	1	5302174	hypothetical protein		-552.476	1	0	0	0	0	0
FVEG_00338	hypothetical protein FG00282.1 [Gibberella zeae PH-1]	1	5302918	hypothetical protein		-3164.31	2	0	0	0	0	0
FVEG_00337	hypothetical protein FG00281.1 [Gibberella zeae PH-1]	1	5308437	hypothetical protein		-733.817	1	0	0	0	0	0
FVEG_00336	hypothetical protein FG00280.1 [Gibberella zeae PH-1]	1	5310289	histone acetyltransferase GCN5		-4.39261	4	0	0	0	OTHER	3
FVEG_00335	hypothetical protein FG00279.1 [Gibberella zeae PH-1]	1	5312862	hypothetical protein		-991.528	1	0	0	0	OTHER	3
FVEG_00334	hypothetical protein FG00278.1 [Gibberella zeae PH-1]	1	5316075	biotin synthase		0	1	0	0	0	OTHER	3
FVEG_00333	hypothetical protein FG00277.1 [Gibberella zeae PH-1]	1	5318845	hypothetical protein		-1461.22	1	0	0	0	OTHER	3
FVEG_00332	MPU1p [Gibberella moniliformis]	1	5322328	hypothetical protein		-1694.8	1	0	0	0	OTHER	3
FVEG_00331	ORF21 protein [Gibberella moniliformis]	1	5323596	hypothetical protein		0.635625	5	0	0	0	OTHER	3
FVEG_00330	ORF20 protein [Gibberella moniliformis]	1	5327480	hypothetical protein		-8702.38	2	0	0	0	OTHER	3
FVEG_00329	Fum19p [Gibberella moniliformis]	1	5331065	hypothetical protein	Fumonisin	-9779.89	2	9779.89	14	2	OTHER	3
FVEG_00328	Fum18p [Gibberella moniliformis]	1	5336151	hypothetical protein	Fumonisin	-9238	2	9779.89	14	2	OTHER	3
FVEG_00327	Fum17p [Gibberella moniliformis]	1	5337696	hypothetical protein	Fumonisin	-9445.07	2	9779.89	14	2	OTHER	3
FVEG_00326	Fum16p [Gibberella moniliformis]	1	5339384	hypothetical protein	Fumonisin	-9351.67	2	9779.89	14	2	OTHER	3
FVEG_00325	Fum14p [Gibberella moniliformis]	1	5344144	hypothetical protein	Fumonisin	0.867763	4	9779.89	14	2	OTHER	3
FVEG_00324	Fum13p [Gibberella moniliformis]	1	5346406	hypothetical protein	Fumonisin	-8067.31	2	9779.89	14	2	OTHER	3
FVEG_00323	Fum2p [Gibberella moniliformis]	1	5348288	hypothetical protein	Fumonisin	-8439.34	2	9779.89	14	2	OTHER	3
FVEG_00322	Fum11p [Gibberella moniliformis]	1	5350694	hypothetical protein	Fumonisin	0	1	9779.89	14	2	OTHER	3
FVEG_00321	Fum10p [Gibberella moniliformis]	1	5352441	hypothetical protein	Fumonisin	-6571.07	2	9779.89	14	2	OTHER	3
FVEG_00320	Fum3p [Gibberella moniliformis]	1	5354517	hypothetical protein	Fumonisin	-9573.62	2	9779.89	14	2	OTHER	3
FVEG_00318	FUM8p [Gibberella moniliformis]_x0001_gb|ADQ38999.1| FUM8p [Gibberella moniliformis]_x0001_gb|ADQ39002.1| FUM8p [Gibberella moniliformis]_x0001_gb|ADQ39004.1| FUM8p [Gibberella moniliformis]_x0001_gb|ADQ39006.1| FUM8p [Gibberella moniliformis]_x0001_gb|ADQ39012.1| FUM8p [Gibberella moniliformis]	1	5356180	hypothetical protein	Fumonisin	-6621.33	2	9779.89	14	2	OTHER	3
FVEG_00319	Fum7p [Gibberella moniliformis]	1	5359393	hypothetical protein	Fumonisin	-5519.89	2	9779.89	14	2	OTHER	3
FVEG_00317	Fum6p [Gibberella moniliformis]	1	5361001	hypothetical protein	Fumonisin	1.10084	4	9779.89	14	2	OTHER	3
FVEG_00316	Fum1p [Gibberella moniliformis]	1	5365148	hypothetical protein	Fumonisin	0	1	9779.89	14	2	OTHER	3
FVEG_00315	Fum21p [Gibberella moniliformis]	1	5374039	hypothetical protein	Fumonisin	-1.21078	6	0	0	0	0	0
FVEG_00314	Zbd1p [Gibberella moniliformis]	1	5377515	hypothetical protein		0	1	0	0	0	0	0
FVEG_00313	Znf1p [Gibberella moniliformis]	1	5379482	hypothetical protein		1.04682	5	0	0	0	0	0
FVEG_00312	RecName: Full=Protein PNG1_x0001_gb|AAN74810.1| Png1p [Gibberella moniliformis]	1	5380836	hypothetical protein		0	1	0	0	0	0	0
FVEG_00311	Wdr1p [Gibberella moniliformis]	1	5387183	hypothetical protein		0	1	0	0	0	0	0
FVEG_00310	Npt1p [Gibberella moniliformis]	1	5390472	hypothetical protein		-2.07976	3	0	0	0	0	0
FVEG_00309	hypothetical protein NECHADRAFT_80749 [Nectria haematococca mpVI 77-13-4]_x0001_gb|EEU45646.1| hypothetical protein NECHADRAFT_80749 [Nectria haematococca mpVI 77-13-4]	1	5392515	hypothetical protein		0.395006	5	0	0	0	0	0
FVEG_00308	hypothetical protein FG00268.1 [Gibberella zeae PH-1]	1	5394204	hypothetical protein		10.8449	4	0	0	0	0	0
FVEG_00307	-	1	5396065	hypothetical protein		0	1	0	0	0	0	0
FVEG_00305	hypothetical protein FG00267.1 [Gibberella zeae PH-1]	1	5397035	hypothetical protein		4.83158	2	0	0	0	0	0
FVEG_00306	hypothetical protein FG00266.1 [Gibberella zeae PH-1]	1	5398716	hypothetical protein		1.10945	5	0	0	0	0	0
FVEG_00304	-	1	5401059	hypothetical protein		9.55765	2	0	0	0	0	0
FVEG_00303	hypothetical protein NECHADRAFT_40904 [Nectria haematococca mpVI 77-13-4]_x0001_gb|EEU45253.1| hypothetical protein NECHADRAFT_40904 [Nectria haematococca mpVI 77-13-4]	1	5403873	hypothetical protein		0	1	0	0	0	0	0
FVEG_00302	hypothetical protein FG00264.1 [Gibberella zeae PH-1]	1	5406949	hypothetical protein		4.67072	3	0	0	0	0	0
FVEG_00301	hypothetical protein FG00263.1 [Gibberella zeae PH-1]	1	5408397	hypothetical protein		0	1	0	0	0	0	0
FVEG_00300	hypothetical protein FG00262.1 [Gibberella zeae PH-1]	1	5411337	hypothetical protein		7.77478	4	0	0	0	0	0
FVEG_00299	hypothetical protein FG00261.1 [Gibberella zeae PH-1]	1	5413231	hypothetical protein		0	1	0	0	0	0	0
FVEG_00298	hypothetical protein FG00260.1 [Gibberella zeae PH-1]	1	5417710	hypothetical protein		0	1	0	0	0	0	0
FVEG_00297	hypothetical protein FG00259.1 [Gibberella zeae PH-1]	1	5418510	hypothetical protein		-13.1076	6	0	0	0	0	0
FVEG_00296	hypothetical protein FG00257.1 [Gibberella zeae PH-1]	1	5423406	hypothetical protein		0	1	0	0	0	0	0
FVEG_00295	-	1	5425144	hypothetical protein		68.6377	4	0	0	0	0	0
FVEG_00294	hypothetical protein FG07754.1 [Gibberella zeae PH-1]	1	5427219	hypothetical protein		152.484	4	152.484	4	4	0	0
FVEG_00293	hypothetical protein FG00255.1 [Gibberella zeae PH-1]	1	5428547	hypothetical protein		90.1021	4	152.484	4	4	0	0
FVEG_00292	hypothetical protein FG00252.1 [Gibberella zeae PH-1]	1	5431001	hypothetical protein		1.94123	2	152.484	4	4	0	0
FVEG_00291	TPA_inf: galactose oxidase precursor [Gibberella moniliformis 7600]	1	5435206	galactose oxidase precursor		0	1	152.484	4	4	0	0
FVEG_00290	hypothetical protein FG00250.1 [Gibberella zeae PH-1]	1	5440759	hypothetical protein		2.20384	2	0	0	0	0	0
FVEG_00289	hypothetical protein FG00249.1 [Gibberella zeae PH-1]	1	5447183	hypothetical protein		10.3537	6	0	0	0	0	0
FVEG_00288	hypothetical protein FG00248.1 [Gibberella zeae PH-1]	1	5448740	hypothetical protein		8.07311	2	0	0	0	0	0
FVEG_00287	hypothetical protein FG00247.1 [Gibberella zeae PH-1]	1	5459580	hypothetical protein		0	1	0	0	0	0	0
FVEG_00286	-	1	5462348	hypothetical protein		23.6928	4	0	0	0	0	0
FVEG_00285	-	1	5465409	hypothetical protein		60.5545	4	60.5545	3	4	0	0
FVEG_00284	-	1	5467512	hypothetical protein		15.9714	2	60.5545	3	4	0	0
FVEG_00283	-	1	5470134	hypothetical protein		0	1	60.5545	3	4	0	0
FVEG_00282	hypothetical protein FG00244.1 [Gibberella zeae PH-1]	1	5472749	hypothetical protein		15.4771	4	0	0	0	0	0
FVEG_00281	hypothetical protein FG00243.1 [Gibberella zeae PH-1]	1	5474126	hypothetical protein		-16.9194	6	0	0	0	0	0
FVEG_00280	-	1	5481691	hypothetical protein		30.6085	4	0	0	0	0	0
FVEG_00279	-	1	5484591	hypothetical protein		0	1	0	0	0	0	0
FVEG_00278	-	1	5486028	hypothetical protein		-18.9806	6	0	0	0	0	0
FVEG_00277	-	1	5489152	hypothetical protein		0	1	0	0	0	0	0
FVEG_00276	-	1	5492957	hypothetical protein		35.4361	4	0	0	0	0	0
FVEG_00275	-	1	5494362	hypothetical protein		42.6366	4	0	0	0	0	0
FVEG_00274	-	1	5496052	hypothetical protein		50.7102	4	0	0	0	0	0
FVEG_00273	-	1	5497569	hypothetical protein		57.6291	4	0	0	0	0	0
FVEG_00272	conserved hypothetical protein [Verticillium albo-atrum VaMs.102]_x0001_gb|EEY18958.1| conserved hypothetical protein [Verticillium albo-atrum VaMs.102]	1	5498761	hypothetical protein		1.33872	5	0	0	0	0	0
FVEG_00271	hypothetical protein NECHADRAFT_41379 [Nectria haematococca mpVI 77-13-4]_x0001_gb|EEU45661.1| hypothetical protein NECHADRAFT_41379 [Nectria haematococca mpVI 77-13-4]	1	5503331	hypothetical protein		-19.5357	6	0	0	0	0	0
FVEG_00270	-	1	5506704	hypothetical protein		48.4887	4	0	0	0	0	0
FVEG_00269	-	1	5508383	hypothetical protein		57.8969	4	0	0	0	0	0
FVEG_00268	hypothetical protein FG00238.1 [Gibberella zeae PH-1]	1	5509970	hypothetical protein		-7.22901	1	0	0	0	0	0
FVEG_00267	-	1	5512288	hypothetical protein		117.648	4	0	0	0	0	0
FVEG_00266	hypothetical protein NECHADRAFT_51141 [Nectria haematococca mpVI 77-13-4]_x0001_gb|EEU35445.1| hypothetical protein NECHADRAFT_51141 [Nectria haematococca mpVI 77-13-4]	1	5513900	hypothetical protein		-88.484	6	0	0	0	0	0
FVEG_00265	hypothetical protein FG00230.1 [Gibberella zeae PH-1]	1	5515172	hypothetical protein		174.043	4	0	0	0	0	0
FVEG_00264	-	1	5515942	hypothetical protein		-2.05011	2	0	0	0	0	0
FVEG_00263	hypothetical protein NECHADRAFT_61450 [Nectria haematococca mpVI 77-13-4]_x0001_gb|EEU45676.1| hypothetical protein NECHADRAFT_61450 [Nectria haematococca mpVI 77-13-4]	1	5519942	hypothetical protein		203.716	4	0	0	0	0	0
FVEG_00262	hypothetical protein FG08282.1 [Gibberella zeae PH-1]	1	5521344	hypothetical protein		234.925	4	234.925	11	4	0	0
FVEG_00261	hypothetical protein FG00210.1 [Gibberella zeae PH-1]	1	5524069	hypothetical protein		0	1	234.925	11	4	0	0
FVEG_00260	hypothetical protein NECHADRAFT_80860 [Nectria haematococca mpVI 77-13-4]_x0001_gb|EEU45300.1| hypothetical protein NECHADRAFT_80860 [Nectria haematococca mpVI 77-13-4]	1	5527508	hypothetical protein		169.998	4	234.925	11	4	0	0
FVEG_00259	hypothetical protein FG04497.1 [Gibberella zeae PH-1]	1	5530570	hypothetical protein		213.648	4	234.925	11	4	0	0
FVEG_00258	hypothetical protein FG11536.1 [Gibberella zeae PH-1]	1	5533454	hypothetical protein		174.16	4	234.925	11	4	0	0
FVEG_00257	hypothetical protein NECHADRAFT_45071 [Nectria haematococca mpVI 77-13-4]_x0001_gb|EEU43351.1| hypothetical protein NECHADRAFT_45071 [Nectria haematococca mpVI 77-13-4]	1	5536361	hypothetical protein		0	1	234.925	11	4	0	0
FVEG_00256	Ankyrin repeat protein [Metarhizium anisopliae ARSEF 23]	1	5540461	hypothetical protein		-13.8062	2	234.925	11	4	0	0
FVEG_00255	hypothetical protein FG11167.1 [Gibberella zeae PH-1]	1	5545444	hypothetical protein		67.4302	4	234.925	11	4	0	0
FVEG_00254	predicted protein [Nectria haematococca mpVI 77-13-4]_x0001_gb|EEU45245.1| predicted protein [Nectria haematococca mpVI 77-13-4]	1	5551378	hypothetical protein		111.186	4	234.925	11	4	0	0
FVEG_00253	hypothetical protein NECHADRAFT_75765 [Nectria haematococca mpVI 77-13-4]_x0001_gb|EEU49018.1| hypothetical protein NECHADRAFT_75765 [Nectria haematococca mpVI 77-13-4]	1	5552916	hypothetical protein		-21.599	2	234.925	11	4	0	0
FVEG_00252	hypothetical protein ANI_1_2300014 [Aspergillus niger CBS 513.88]	1	5556511	hypothetical protein		-25.2699	2	234.925	11	4	0	0
FVEG_00251	putative histone acetyltransferase [Gibberella fujikuroi]	1	5558053	hypothetical protein		-6.03485	1	0	0	0	0	0
FVEG_14082	proteinase inhibitor I4 [Metarhizium anisopliae ARSEF 23]	1	5570046	hypothetical protein		0	1	0	0	0	0	0
FVEG_00250	C6 transcription factor, putative [Talaromyces stipitatus ATCC 10500]_x0001_ref|XP_002485168.1| C6 transcription factor, putative [Talaromyces stipitatus ATCC 10500]_x0001_gb|EED15214.1| C6 transcription factor, putative [Talaromyces stipitatus ATCC 10500]_x0001_gb|EED15215.1| C6 transcription factor, putative [Talaromyces stipitatus ATCC 10500]	1	5572299	hypothetical protein		-57.0985	2	0	0	0	0	0
FVEG_00249	aflYc/ glcA/ glucosidase [Aspergillus flavus NRRL3357]_x0001_gb|EED51147.1| aflYc/ glcA/ glucosidase [Aspergillus flavus NRRL3357]	1	5574689	hypothetical protein		-12.9	3	0	0	0	0	0
FVEG_00248	sugar transporter, putative [Metarhizium anisopliae ARSEF 23]	1	5577794	hypothetical protein		0	1	0	0	0	0	0
FVEG_00247	putative two-component response regulator REC1p [Gibberella moniliformis]	1	5582099	hypothetical protein		-61.0568	2	0	0	0	0	0
FVEG_00246	hypothetical protein AOR_1_544164 [Aspergillus oryzae RIB40]_x0001_dbj|BAE56848.1| unnamed protein product [Aspergillus oryzae RIB40]	1	5583182	hypothetical protein		-48.4931	3	0	0	0	0	0
FVEG_00245	hypothetical protein NECHADRAFT_45674 [Nectria haematococca mpVI 77-13-4]_x0001_gb|EEU38731.1| hypothetical protein NECHADRAFT_45674 [Nectria haematococca mpVI 77-13-4]	1	5584109	hypothetical protein		-81.0676	2	81.0676	3	2	0	0
FVEG_00244	hypothetical protein NECHADRAFT_83163 [Nectria haematococca mpVI 77-13-4]_x0001_gb|EEU38730.1| hypothetical protein NECHADRAFT_83163 [Nectria haematococca mpVI 77-13-4]	1	5586970	hypothetical protein		-42.4598	5	81.0676	3	2	0	0
FVEG_00243	predicted protein [Nectria haematococca mpVI 77-13-4]_x0001_gb|EEU38847.1| predicted protein [Nectria haematococca mpVI 77-13-4]	1	5589041	hypothetical protein		3.42671	6	81.0676	3	2	0	0
FVEG_00242	hypothetical protein FG05823.1 [Gibberella zeae PH-1]	1	5591341	hypothetical protein		-10.6627	4	0	0	0	0	0
FVEG_00240	hypothetical protein FG00217.1 [Gibberella zeae PH-1]	1	5594877	hypothetical protein		6.87756	6	0	0	0	OTHER	2
FVEG_00239	-	1	5598457	hypothetical protein		-59.0186	4	59.0186	3	4	OTHER	2
FVEG_00238	hypothetical protein FG10617.1 [Gibberella zeae PH-1]	1	5600551	hypothetical protein		-47.7126	2	59.0186	3	4	OTHER	2
FVEG_00237	hypothetical protein FG11574.1 [Gibberella zeae PH-1]	1	5604106	hypothetical protein		-45.1834	5	59.0186	3	4	OTHER	2
FVEG_00236	predicted protein [Nectria haematococca mpVI 77-13-4]_x0001_gb|EEU47142.1| predicted protein [Nectria haematococca mpVI 77-13-4]	1	5607786	hypothetical protein		-41.4131	1	0	0	0	OTHER	2
FVEG_00235	hypothetical protein FG00218.1 [Gibberella zeae PH-1]	1	5610157	hypothetical protein		0	1	0	0	0	OTHER	2
FVEG_00234	-	1	5612402	hypothetical protein		-28.0605	1	0	0	0	OTHER	2
FVEG_00233	-	1	5612874	hypothetical protein		-63.0783	5	0	0	0	OTHER	2
FVEG_00232	hypothetical protein FG00219.1 [Gibberella zeae PH-1]	1	5614030	hypothetical protein		0	1	0	0	0	OTHER	2
FVEG_00231	hypothetical protein SNOG_13918 [Phaeosphaeria nodorum SN15]_x0001_gb|EAT78543.1| hypothetical protein SNOG_13918 [Phaeosphaeria nodorum SN15]	1	5615753	hypothetical protein		0	1	0	0	0	OTHER	2
FVEG_00230	pyrimidine 5'-nucleotidase [Glomerella graminicola M1.001]	1	5621382	hypothetical protein		0	1	0	0	0	OTHER	2
FVEG_00229	hypothetical protein NECHADRAFT_104581 [Nectria haematococca mpVI 77-13-4]_x0001_gb|EEU45685.1| hypothetical protein NECHADRAFT_104581 [Nectria haematococca mpVI 77-13-4]	1	5623476	hypothetical protein		-2.14436	6	0	0	0	OTHER	2
FVEG_00228	hypothetical protein FG00227.1 [Gibberella zeae PH-1]	1	5625034	hypothetical protein		-163.922	5	163.922	10	5	OTHER	2
FVEG_00227	stress-induced bacterial acidophilic repeat domain-containing protein [Glomerella graminicola M1.001]	1	5628654	conidiation-specific protein 10		0	1	163.922	10	5	OTHER	2
FVEG_00226	-	1	5629522	hypothetical protein		-115.112	5	163.922	10	5	OTHER	2
FVEG_00225	hypothetical protein NECHADRAFT_41535 [Nectria haematococca mpVI 77-13-4]_x0001_gb|EEU45712.1| hypothetical protein NECHADRAFT_41535 [Nectria haematococca mpVI 77-13-4]	1	5630890	hypothetical protein		-7.19882	6	163.922	10	5	OTHER	2
FVEG_00224	hypothetical protein FG00198.1 [Gibberella zeae PH-1]	1	5632825	hypothetical protein		-42.2277	5	163.922	10	5	0	0
FVEG_00223	hypothetical protein FG00197.1 [Gibberella zeae PH-1]	1	5634990	hypothetical protein		2.67898	1	163.922	10	5	0	0
FVEG_00222	hypothetical protein FG00196.1 [Gibberella zeae PH-1]	1	5637633	hypothetical protein		-51.1057	5	163.922	10	5	0	0
FVEG_00221	hypothetical protein NECHADRAFT_70566 [Nectria haematococca mpVI 77-13-4]_x0001_gb|EEU39687.1| hypothetical protein NECHADRAFT_70566 [Nectria haematococca mpVI 77-13-4]	1	5639758	hypothetical protein		-66.1431	5	163.922	10	5	0	0
FVEG_00220	hypothetical protein NECHADRAFT_70569 [Nectria haematococca mpVI 77-13-4]_x0001_gb|EEU39286.1| hypothetical protein NECHADRAFT_70569 [Nectria haematococca mpVI 77-13-4]	1	5642507	hypothetical protein		-2.72457	4	163.922	10	5	0	0
FVEG_00219	hypothetical protein NECHADRAFT_101041 [Nectria haematococca mpVI 77-13-4]_x0001_gb|EEU39287.1| hypothetical protein NECHADRAFT_101041 [Nectria haematococca mpVI 77-13-4]	1	5644182	hypothetical protein		5.17245	1	163.922	10	5	0	0
FVEG_00218	-	1	5645915	hypothetical protein		9.70616	5	0	0	0	0	0
FVEG_00217	hypothetical protein FG00200.1 [Gibberella zeae PH-1]	1	5646648	hypothetical protein		2.72192	1	0	0	0	0	0
FVEG_00216	hypothetical protein FG00201.1 [Gibberella zeae PH-1]	1	5649657	hypothetical protein		2.70027	1	0	0	0	0	0
FVEG_00215	hypothetical protein NECHADRAFT_80850 [Nectria haematococca mpVI 77-13-4]_x0001_gb|EEU45706.1| hypothetical protein NECHADRAFT_80850 [Nectria haematococca mpVI 77-13-4]	1	5652730	hypothetical protein		17.5597	5	0	0	0	0	0
FVEG_00214	hypothetical protein FG00195.1 [Gibberella zeae PH-1]	1	5655651	hypothetical protein		18.4357	5	0	0	0	0	0
FVEG_00213	hypothetical protein FG00194.1 [Gibberella zeae PH-1]	1	5660418	hypothetical protein		43.9786	5	0	0	0	0	0
FVEG_00212	hypothetical protein FG00192.1 [Gibberella zeae PH-1]	1	5665842	hypothetical protein		0	1	0	0	0	0	0
FVEG_00211	-	1	5669079	hypothetical protein		17.7246	6	0	0	0	0	0
FVEG_00210	hypothetical protein FG00191.1 [Gibberella zeae PH-1]	1	5672978	hypothetical protein		1.06403	2	0	0	0	0	0
FVEG_00209	hypothetical protein FG00191.1 [Gibberella zeae PH-1]	1	5674989	hypothetical protein		0	1	0	0	0	0	0
FVEG_00208	predicted protein [Nectria haematococca mpVI 77-13-4]_x0001_gb|EEU45719.1| predicted protein [Nectria haematococca mpVI 77-13-4]	1	5679123	NADH-ubiquinone oxidoreductase 9.5 kDa subunit		5.68156	5	0	0	0	0	0
FVEG_00207	hypothetical protein NECHADRAFT_61480 [Nectria haematococca mpVI 77-13-4]_x0001_gb|EEU45304.1| hypothetical protein NECHADRAFT_61480 [Nectria haematococca mpVI 77-13-4]	1	5679743	hypothetical protein		4.36633	2	0	0	0	0	0
FVEG_00206	hypothetical protein FG00188.1 [Gibberella zeae PH-1]	1	5682784	pre-mRNA-splicing factor isy-1		4.8506	1	0	0	0	0	0
FVEG_00205	hypothetical protein FG00187.1 [Gibberella zeae PH-1]	1	5685307	hypothetical protein		3.54374	2	0	0	0	0	0
FVEG_00204	hypothetical protein FG00186.1 [Gibberella zeae PH-1]	1	5688171	hypothetical protein		5.93153	5	0	0	0	0	0
FVEG_00203	hypothetical protein NECHADRAFT_41403 [Nectria haematococca mpVI 77-13-4]_x0001_gb|EEU45307.1| hypothetical protein NECHADRAFT_41403 [Nectria haematococca mpVI 77-13-4]	1	5690508	hypothetical protein		3.15881	6	0	0	0	0	0
FVEG_00202	hypothetical protein NECHADRAFT_40647 [Nectria haematococca mpVI 77-13-4]_x0001_gb|EEU45308.1| hypothetical protein NECHADRAFT_40647 [Nectria haematococca mpVI 77-13-4]	1	5691918	hypothetical protein		11.107	5	0	0	0	0	0
FVEG_00201	hypothetical protein NECHADRAFT_93915 [Nectria haematococca mpVI 77-13-4]_x0001_gb|EEU45722.1| hypothetical protein NECHADRAFT_93915 [Nectria haematococca mpVI 77-13-4]	1	5693599	hypothetical protein		0	1	0	0	0	0	0
FVEG_00200	hypothetical protein FG00184.1 [Gibberella zeae PH-1]_x0001_gb|AAT84250.1| putative xylanase 1 [Gibberella zeae]	1	5694435	hypothetical protein		6.05357	5	0	0	0	0	0
FVEG_00199	hypothetical protein NFIA_092800 [Neosartorya fischeri NRRL 181]_x0001_gb|EAW19319.1| conserved hypothetical protein [Neosartorya fischeri NRRL 181]	1	5696385	hypothetical protein		19.6934	6	0	0	0	0	0
FVEG_00198	hypothetical protein FG00183.1 [Gibberella zeae PH-1]	1	5699943	hypothetical protein		19.5912	6	0	0	0	0	0
FVEG_00197	hypothetical protein FG00182.1 [Gibberella zeae PH-1]	1	5702026	COP9 signalosome complex subunit 2		0	1	0	0	0	0	0
FVEG_00196	-	1	5706555	hypothetical protein		13.0985	6	0	0	0	0	0
FVEG_00195	ubiquitin thiolesterase (OtuB1), putative [Metarhizium anisopliae ARSEF 23]	1	5708423	hypothetical protein		-13.6524	2	0	0	0	0	0
FVEG_00194	-	1	5710791	hypothetical protein		-14.098	2	0	0	0	0	0
FVEG_00193	hypothetical protein FG00179.1 [Gibberella zeae PH-1]	1	5713273	hypothetical protein		17.6518	6	0	0	0	0	0
FVEG_00192	hypothetical protein NECHADRAFT_104591 [Nectria haematococca mpVI 77-13-4]_x0001_gb|EEU45724.1| hypothetical protein NECHADRAFT_104591 [Nectria haematococca mpVI 77-13-4]	1	5715250	hypothetical protein		18.5082	6	0	0	0	0	0
FVEG_00191	hypothetical protein LOC100382995 [Zea mays]_x0001_gb|ACN31768.1| unknown [Zea mays]	1	5718299	hypothetical protein		17.1795	6	0	0	0	0	0
FVEG_00190	hypothetical protein FG00176.1 [Gibberella zeae PH-1]	1	5719833	mitochondrial 2-methylisocitrate lyase		43.5902	3	0	0	0	0	0
FVEG_00189	methylcitrate synthase precursor [Gibberella moniliformis]	1	5722900	2-methylcitrate synthase, mitochondrial precursor		51.9679	3	51.9679	3	3	0	0
FVEG_00188	hypothetical protein FG00174.1 [Gibberella zeae PH-1]	1	5724348	hypothetical protein		4.16959	4	51.9679	3	3	0	0
FVEG_00187	hypothetical protein FG00173.1 [Gibberella zeae PH-1]	1	5725638	hypothetical protein		0	1	51.9679	3	3	0	0
FVEG_00186	hypothetical protein FG00172.1 [Gibberella zeae PH-1]	1	5727738	hypothetical protein		15.989	4	15.989	3	4	0	0
FVEG_00185	hypothetical protein NEUTE1DRAFT_68071 [Neurospora tetrasperma FGSC 2508]	1	5730373	hypothetical protein		0	1	15.989	3	4	0	0
FVEG_00184	hypothetical protein FG00171.1 [Gibberella zeae PH-1]	1	5736886	hypothetical protein		0.105166	2	15.989	3	4	0	0
FVEG_00183	hypothetical protein FG00170.1 [Gibberella zeae PH-1]	1	5738527	protein rho3		-3.35681	6	0	0	0	0	0
FVEG_00182	hypothetical protein NECHADRAFT_100723 [Nectria haematococca mpVI 77-13-4]_x0001_gb|EEU45761.1| hypothetical protein NECHADRAFT_100723 [Nectria haematococca mpVI 77-13-4]	1	5740269	hypothetical protein		-1.83633	1	0	0	0	0	0
FVEG_00181	hypothetical protein FG00168.1 [Gibberella zeae PH-1]	1	5742203	hypothetical protein		6.99299	4	0	0	0	0	0
FVEG_00180	hypothetical protein FG00166.1 [Gibberella zeae PH-1]	1	5743650	hypothetical protein		-3.38128	1	0	0	0	0	0
FVEG_00179	hypothetical protein NECHADRAFT_40704 [Nectria haematococca mpVI 77-13-4]_x0001_gb|EEU45351.1| hypothetical protein NECHADRAFT_40704 [Nectria haematococca mpVI 77-13-4]	1	5746584	hypothetical protein		10.3214	4	0	0	0	0	0
FVEG_00178	hypothetical protein NECHADRAFT_41596 [Nectria haematococca mpVI 77-13-4]_x0001_gb|EEU45764.1| hypothetical protein NECHADRAFT_41596 [Nectria haematococca mpVI 77-13-4]	1	5748887	hypothetical protein		0	1	0	0	0	0	0
FVEG_00177	-	1	5750978	hypothetical protein		0	1	0	0	0	0	0
FVEG_00176	-	1	5753172	hypothetical protein		7.56632	4	0	0	0	0	0
FVEG_00175	-	1	5756991	hypothetical protein		9.99271	4	0	0	0	0	0
FVEG_00174	-	1	5760991	hypothetical protein		13.7614	4	0	0	0	0	0
FVEG_00173	-	1	5761776	hypothetical protein		18.8401	4	0	0	0	0	0
FVEG_00172	-	1	5763185	hypothetical protein		28.2003	4	0	0	0	0	0
FVEG_00171	-	1	5764541	hypothetical protein		-4.4247	5	0	0	0	0	0
FVEG_00170	hypothetical protein NECHADRAFT_41484 [Nectria haematococca mpVI 77-13-4]_x0001_gb|EEU45767.1| hypothetical protein NECHADRAFT_41484 [Nectria haematococca mpVI 77-13-4]	1	5765486	succinate-semialdehyde dehydrogenase		40.8272	4	0	0	0	0	0
FVEG_00169	hypothetical protein NECHADRAFT_41234 [Nectria haematococca mpVI 77-13-4]_x0001_gb|EEU45768.1| hypothetical protein NECHADRAFT_41234 [Nectria haematococca mpVI 77-13-4]	1	5768487	hypothetical protein		-2.1265	2	0	0	0	0	0
FVEG_00168	hypothetical protein FG00153.1 [Gibberella zeae PH-1]	1	5770823	hypothetical protein		-13.8749	1	0	0	0	0	0
FVEG_00167	hypothetical protein NECHADRAFT_51474 [Nectria haematococca mpVI 77-13-4]_x0001_gb|EEU37453.1| hypothetical protein NECHADRAFT_51474 [Nectria haematococca mpVI 77-13-4]	1	5774872	hypothetical protein		-24.8936	3	0	0	0	0	0
FVEG_00166	expressed protein [Nectria haematococca mpVI 77-13-4]_x0001_gb|EEU33704.1| expressed protein [Nectria haematococca mpVI 77-13-4]	1	5775755	hypothetical protein		56.3319	4	0	0	0	0	0
FVEG_00165	hypothetical protein FG08248.1 [Gibberella zeae PH-1]	1	5778138	hypothetical protein		-97.6647	6	97.6647	3	6	0	0
FVEG_00164	hypothetical protein CHGG_09652 [Chaetomium globosum CBS 148.51]_x0001_gb|EAQ83248.1| hypothetical protein CHGG_09652 [Chaetomium globosum CBS 148.51]	1	5782842	hypothetical protein		-11.8791	5	97.6647	3	6	0	0
FVEG_00163	hypothetical protein CTHT_0046710 [Chaetomium thermophilum var. thermophilum DSM 1495]	1	5784340	hypothetical protein		0	1	97.6647	3	6	0	0
FVEG_00162	-	1	5786390	hypothetical protein		-5.19669	5	0	0	0	0	0
FVEG_00161	hypothetical protein NECHADRAFT_94069 [Nectria haematococca mpVI 77-13-4]_x0001_gb|EEU36863.1| hypothetical protein NECHADRAFT_94069 [Nectria haematococca mpVI 77-13-4]	1	5786858	hypothetical protein		-4.29299	2	0	0	0	0	0
FVEG_00160	hypothetical protein FG00152.1 [Gibberella zeae PH-1]	1	5789254	hypothetical protein		-4.56862	2	0	0	0	0	0
FVEG_00159	hypothetical protein FG04847.1 [Gibberella zeae PH-1]	1	5791507	hypothetical protein		-14.3606	5	0	0	0	0	0
FVEG_00158	-	1	5794234	hypothetical protein		0	1	0	0	0	0	0
FVEG_00157	hypothetical protein FG04576.1 [Gibberella zeae PH-1]	1	5795438	hypothetical protein		-60.9224	4	60.9224	3	4	0	0
FVEG_00156	hypothetical protein FG00150.1 [Gibberella zeae PH-1]	1	5799031	hypothetical protein		-11.0796	3	60.9224	3	4	0	0
FVEG_00155	hypothetical protein FG00136.1 [Gibberella zeae PH-1]	1	5806425	hypothetical protein		0	1	60.9224	3	4	0	0
FVEG_00154	hypothetical protein FG00137.1 [Gibberella zeae PH-1]	1	5810761	hypothetical protein		-25.4663	1	0	0	0	0	0
FVEG_00153	hypothetical protein FG00144.1 [Gibberella zeae PH-1]	1	5811779	hypothetical protein		16.4143	5	0	0	0	0	0
FVEG_00152	hypothetical protein FG00138.1 [Gibberella zeae PH-1]	1	5816480	hypothetical protein		31.1908	5	0	0	0	0	0
FVEG_00151	predicted protein [Nectria haematococca mpVI 77-13-4]_x0001_gb|EEU45748.1| predicted protein [Nectria haematococca mpVI 77-13-4]	1	5817983	aldehyde dehydrogenase		-24.5081	2	0	0	0	0	0
FVEG_00150	hypothetical protein FG00140.1 [Gibberella zeae PH-1]	1	5820013	hypothetical protein		-42.1865	2	0	0	0	0	0
FVEG_00149	hypothetical protein NECHADRAFT_69762 [Nectria haematococca mpVI 77-13-4]_x0001_gb|EEU45334.1| hypothetical protein NECHADRAFT_69762 [Nectria haematococca mpVI 77-13-4]	1	5829184	hypothetical protein		-36.4506	1	0	0	0	0	0
FVEG_00148	-	1	5831449	hypothetical protein		-29.3729	3	0	0	0	0	0
FVEG_00147	hypothetical protein FG00125.1 [Gibberella zeae PH-1]	1	5832870	hypothetical protein		51.2711	4	0	0	0	0	0
FVEG_00146	hypothetical protein FG00124.1 [Gibberella zeae PH-1]	1	5834706	hypothetical protein		-46.4204	6	0	0	0	0	0
FVEG_00145	hypothetical protein FG00118.1 [Gibberella zeae PH-1]	1	5837629	hypothetical protein		58.1961	4	0	0	0	0	0
FVEG_00144	predicted protein [Nectria haematococca mpVI 77-13-4]_x0001_gb|EEU48573.1| predicted protein [Nectria haematococca mpVI 77-13-4]	1	5839794	hypothetical protein		0	1	0	0	0	0	0
FVEG_00143	-	1	5843740	hypothetical protein		44.1903	4	0	0	0	0	0
FVEG_00142	-	1	5845407	hypothetical protein		60.5809	4	0	0	0	0	0
FVEG_00141	predicted protein [Nectria haematococca mpVI 77-13-4]_x0001_gb|EEU37155.1| predicted protein [Nectria haematococca mpVI 77-13-4]	1	5846648	hypothetical protein		0	1	0	0	0	0	0
FVEG_00140	hypothetical protein NECHADRAFT_78331 [Nectria haematococca mpVI 77-13-4]_x0001_gb|EEU37247.1| hypothetical protein NECHADRAFT_78331 [Nectria haematococca mpVI 77-13-4]	1	5847937	hypothetical protein		84.3105	4	0	0	0	0	0
FVEG_00139	hypothetical protein FG09172.1 [Gibberella zeae PH-1]	1	5848616	hypothetical protein		89.8823	4	0	0	0	0	0
FVEG_00138	-	1	5853844	hypothetical protein		-3.25127	5	0	0	0	0	0
FVEG_00137	hypothetical protein FG00058.1 [Gibberella zeae PH-1]	1	5856111	hypothetical protein		67.441	4	0	0	0	0	0
FVEG_00136	rhamnogalacturonan acetylesterase [Verticillium albo-atrum VaMs.102]_x0001_gb|EEY20626.1| rhamnogalacturonan acetylesterase [Verticillium albo-atrum VaMs.102]	1	5857807	hypothetical protein		0	1	0	0	0	0	0
FVEG_00135	-	1	5860101	hypothetical protein		63.9418	4	0	0	0	0	0
FVEG_00134	-	1	5862513	hypothetical protein		-62.1004	1	0	0	0	0	0
FVEG_00133	putative hsp70 protein [Metarhizium acridum CQMa 102]	1	5864549	hypothetical protein		97.896	4	97.896	5	4	0	0
FVEG_00132	hypothetical protein FG03166.1 [Gibberella zeae PH-1]	1	5868138	hypothetical protein		0	1	97.896	5	4	0	0
FVEG_00131	hypothetical protein MAC_02032 [Metarhizium acridum CQMa 102]	1	5872236	hypothetical protein		64.6312	4	97.896	5	4	0	0
FVEG_00130	Pre-mRNA-splicing factor rse-1 [Metarhizium acridum CQMa 102]	1	5874003	hypothetical protein		-5.83092	5	97.896	5	4	0	0
FVEG_00129	hypothetical protein NECHADRAFT_51917 [Nectria haematococca mpVI 77-13-4]_x0001_gb|EEU36690.1| hypothetical protein NECHADRAFT_51917 [Nectria haematococca mpVI 77-13-4]	1	5875457	hypothetical protein		-7.19527	5	97.896	5	4	0	0
FVEG_00128	predicted protein [Trichoderma reesei QM6a]	1	5878692	hypothetical protein		-26.1224	2	0	0	0	0	0
FVEG_00127	hypothetical protein AN3617.2 [Aspergillus nidulans FGSC A4]_x0001_gb|EAA59825.1| hypothetical protein AN3617.2 [Aspergillus nidulans FGSC A4]	1	5880314	hypothetical protein		0	1	0	0	0	0	0
FVEG_00126	-	1	5883520	hypothetical protein		-22.2351	3	0	0	0	0	0
FVEG_00125	predicted protein [Nectria haematococca mpVI 77-13-4]_x0001_gb|EEU44477.1| predicted protein [Nectria haematococca mpVI 77-13-4]	1	5886443	hypothetical protein		-27.2528	3	0	0	0	0	0
FVEG_00124	-	1	5888660	hypothetical protein		-26.194	5	0	0	0	0	0
FVEG_00123	-	1	5890745	hypothetical protein		-39.2728	2	0	0	0	0	0
FVEG_00122	ankyrin repeat-containing protein, putative [Metarhizium anisopliae ARSEF 23]	1	5893271	hypothetical protein		-7.46661	6	0	0	0	0	0
FVEG_00121	-	1	5899981	hypothetical protein		-35.7751	2	0	0	0	0	0
FVEG_00120	-	1	5901814	hypothetical protein		-44.4366	5	0	0	0	0	0
FVEG_00119	-	1	5903937	hypothetical protein		-34.4484	3	0	0	0	0	0
FVEG_00118	hypothetical protein NECHADRAFT_72948 [Nectria haematococca mpVI 77-13-4]_x0001_gb|EEU37677.1| hypothetical protein NECHADRAFT_72948 [Nectria haematococca mpVI 77-13-4]	1	5905509	hypothetical protein		0	1	0	0	0	0	0
FVEG_00117	hypothetical protein NECHADRAFT_53390 [Nectria haematococca mpVI 77-13-4]_x0001_gb|EEU37575.1| hypothetical protein NECHADRAFT_53390 [Nectria haematococca mpVI 77-13-4]	1	5908923	hypothetical protein		-36.9079	1	0	0	0	0	0
FVEG_00116	hypothetical protein FG00059.1 [Gibberella zeae PH-1]	1	5910786	hypothetical protein		-68.8491	2	0	0	0	0	0
FVEG_00115	-	1	5911768	hypothetical protein		-136.298	2	136.298	3	2	0	0
FVEG_00114	hypothetical protein NECHADRAFT_55330 [Nectria haematococca mpVI 77-13-4]_x0001_gb|EEU38494.1| hypothetical protein NECHADRAFT_55330 [Nectria haematococca mpVI 77-13-4]	1	5915061	hypothetical protein		14.7856	4	136.298	3	2	0	0
FVEG_00113	hypothetical protein AN0788.2 [Aspergillus nidulans FGSC A4]_x0001_gb|EAA65618.1| hypothetical protein AN0788.2 [Aspergillus nidulans FGSC A4]_x0001_tpe|CBF88783.1| TPA: epoxide hydrolase, putative (AFU_orthologue; AFUA_5G08810) [Aspergillus nidulans FGSC A4]	1	5916815	hypothetical protein		0	1	136.298	3	2	0	0
FVEG_00112	hypothetical protein FG01749.1 [Gibberella zeae PH-1]	1	5918105	hypothetical protein		-29.7575	1	0	0	0	0	0
FVEG_00111	-	1	5921464	hypothetical protein		-27.8848	6	0	0	0	0	0
FVEG_00110	predicted protein [Nectria haematococca mpVI 77-13-4]_x0001_gb|EEU33372.1| predicted protein [Nectria haematococca mpVI 77-13-4]	1	5923645	hypothetical protein		-34.5565	1	0	0	0	0	0
FVEG_00109	-	1	5925271	hypothetical protein		0	1	0	0	0	0	0
FVEG_00108	-	1	5927980	hypothetical protein		-47.8681	2	0	0	0	0	0
FVEG_00107	hypothetical protein FG08260.1 [Gibberella zeae PH-1]	1	5930726	hypothetical protein		-79.2472	2	0	0	0	0	0
FVEG_00106	predicted protein [Aspergillus terreus NIH2624]_x0001_gb|EAU37996.1| predicted protein [Aspergillus terreus NIH2624]	1	5934967	hypothetical protein		-111.929	2	111.929	3	2	0	0
FVEG_00105	hypothetical protein [Podospora anserina S mat+]_x0001_emb|CAP64515.1| unnamed protein product [Podospora anserina S mat+]	1	5938911	hypothetical protein		-62.732	1	111.929	3	2	0	0
FVEG_00104	-	1	5944589	hypothetical protein		61.9501	4	111.929	3	2	0	0
FVEG_00103	predicted protein [Nectria haematococca mpVI 77-13-4]_x0001_gb|EEU43993.1| predicted protein [Nectria haematococca mpVI 77-13-4]	1	5946194	hypothetical protein		69.802	4	0	0	0	0	0
FVEG_00102	arylsulfatase, putative [Neosartorya fischeri NRRL 181]_x0001_gb|EAW20003.1| arylsulfatase, putative [Neosartorya fischeri NRRL 181]	1	5948242	hypothetical protein		80.7956	4	80.7956	3	4	0	0
FVEG_00101	sugar transporter, putative [Penicillium marneffei ATCC 18224]_x0001_gb|EEA22118.1| sugar transporter, putative [Penicillium marneffei ATCC 18224]	1	5950010	hypothetical protein		53.7743	4	80.7956	3	4	0	0
FVEG_00100	hypothetical protein FG00065.1 [Gibberella zeae PH-1]	1	5952974	hypothetical protein		-38.4929	1	80.7956	3	4	0	0
FVEG_00099	-	1	5954561	hypothetical protein		-33.1702	1	0	0	0	0	0
FVEG_00098	hypothetical protein FG00066.1 [Gibberella zeae PH-1]	1	5956484	hypothetical protein		21.6124	4	0	0	0	0	0
FVEG_00097	-	1	5958183	hypothetical protein		61.7884	4	61.7884	3	4	0	0
FVEG_00096	unnamed protein product [Podospora anserina S mat+]	1	5960288	hypothetical protein		11.8379	2	61.7884	3	4	0	0
FVEG_00095	hypothetical protein FG00067.1 [Gibberella zeae PH-1]	1	5963570	hypothetical protein		3.26902	1	61.7884	3	4	0	0
FVEG_00094	predicted protein [Verticillium albo-atrum VaMs.102]_x0001_gb|EEY17115.1| predicted protein [Verticillium albo-atrum VaMs.102]	1	5965355	hypothetical protein		0	1	0	0	0	0	0
FVEG_00093	predicted protein [Nectria haematococca mpVI 77-13-4]_x0001_gb|EEU37243.1| predicted protein [Nectria haematococca mpVI 77-13-4]	1	5977779	hypothetical protein		0	1	0	0	0	0	0
FVEG_00092	hypothetical protein NECHADRAFT_88078 [Nectria haematococca mpVI 77-13-4]_x0001_gb|EEU35235.1| hypothetical protein NECHADRAFT_88078 [Nectria haematococca mpVI 77-13-4]	1	5979644	hypothetical protein		60.7927	2	60.7927	3	2	0	0
FVEG_00091	predicted protein [Nectria haematococca mpVI 77-13-4]_x0001_gb|EEU35234.1| predicted protein [Nectria haematococca mpVI 77-13-4]	1	5982487	hypothetical protein		28.8241	4	60.7927	3	2	0	0
FVEG_00090	hypothetical protein FG00109.1 [Gibberella zeae PH-1]	1	5984976	hypothetical protein		0	1	60.7927	3	2	0	0
FVEG_00089	alcohol dehydrogenase, putative [Metarhizium anisopliae ARSEF 23]	1	5986130	hypothetical protein		-88.2976	2	0	0	0	0	0
FVEG_00088	hypothetical protein FG02413.1 [Gibberella zeae PH-1]	1	5987893	hypothetical protein		0	1	0	0	0	0	0
FVEG_00087	-	1	5994687	hypothetical protein		-84.5023	2	0	0	0	0	0
FVEG_00086	-	1	5996131	hypothetical protein		-134.213	1	134.213	4	1	0	0
FVEG_00085	hypothetical protein FG01774.1 [Gibberella zeae PH-1]	1	5999323	hypothetical protein		-106.882	1	134.213	4	1	0	0
FVEG_00084	hypothetical protein NECHADRAFT_52578 [Nectria haematococca mpVI 77-13-4]_x0001_gb|EEU36294.1| hypothetical protein NECHADRAFT_52578 [Nectria haematococca mpVI 77-13-4]	1	6002070	hypothetical protein		-88.0036	2	134.213	4	1	0	0
FVEG_00083	hypothetical protein NECHADRAFT_52172 [Nectria haematococca mpVI 77-13-4]_x0001_gb|EEU36982.1| hypothetical protein NECHADRAFT_52172 [Nectria haematococca mpVI 77-13-4]	1	6005829	hypothetical protein		0	1	134.213	4	1	0	0
FVEG_00082	hypothetical protein NECHADRAFT_46033 [Nectria haematococca mpVI 77-13-4]_x0001_gb|EEU41418.1| hypothetical protein NECHADRAFT_46033 [Nectria haematococca mpVI 77-13-4]	1	6011338	hypothetical protein		-2.50386	1	0	0	0	0	0
FVEG_00081	-	1	6014085	hypothetical protein		-48.0637	2	0	0	0	0	0
FVEG_00080	predicted protein [Nectria haematococca mpVI 77-13-4]_x0001_gb|EEU36742.1| predicted protein [Nectria haematococca mpVI 77-13-4]	1	6015347	hypothetical protein		-82.09	2	82.09	4	2	0	0
FVEG_00079	polyketide synthase [Gibberella moniliformis]	1	6016270	hypothetical protein		-67.0547	2	82.09	4	2	OTHER	1
FVEG_00078	hypothetical protein FG04693.1 [Gibberella zeae PH-1]	1	6025790	hypothetical protein		1.41913	4	82.09	4	2	OTHER	1
FVEG_00077	hypothetical protein FG04692.1 [Gibberella zeae PH-1]	1	6028807	hypothetical protein		0	1	82.09	4	2	OTHER	1
FVEG_00076	hypothetical protein FG04691.1 [Gibberella zeae PH-1]	1	6030375	hypothetical protein		-2.90326	6	0	0	0	OTHER	1
FVEG_00075	-	1	6031286	hypothetical protein		-1.48911	1	0	0	0	OTHER	1
FVEG_00074	-	1	6034164	hypothetical protein		5.12598	4	0	0	0	OTHER	1
FVEG_00073	hypothetical protein FG11188.1 [Gibberella zeae PH-1]	1	6034982	hypothetical protein		0	1	0	0	0	OTHER	1
FVEG_00072	hypothetical protein FG11187.1 [Gibberella zeae PH-1]	1	6038645	hypothetical protein		1.01666	5	0	0	0	OTHER	1
FVEG_00071	-	1	6039990	hypothetical protein		-0.769274	2	0	0	0	OTHER	1
FVEG_00070	-	1	6041646	hypothetical protein		12.0287	4	0	0	0	OTHER	1
FVEG_00069	predicted protein [Nectria haematococca mpVI 77-13-4]_x0001_gb|EEU43812.1| predicted protein [Nectria haematococca mpVI 77-13-4]	1	6043046	hypothetical protein		-8.23906	1	0	0	0	OTHER	1
FVEG_00068	hypothetical protein FG11075.1 [Gibberella zeae PH-1]	1	6047832	hypothetical protein		19.8109	4	0	0	0	OTHER	1
FVEG_00067	amino acid transporter [Trichoderma reesei QM6a]	1	6051344	hypothetical protein		0	1	0	0	0	0	0
FVEG_00066	C6 transcription factor OefC [Metarhizium acridum CQMa 102]	1	6053518	hypothetical protein		-1.26584	2	0	0	0	0	0
FVEG_00065	aliphatic nitrilase [Azospirillum sp. B510]_x0001_dbj|BAI72698.1| aliphatic nitrilase [Azospirillum sp. B510]	1	6054920	hypothetical protein		21.1599	4	0	0	0	0	0
FVEG_00064	hypothetical protein FG04835.1 [Gibberella zeae PH-1]	1	6065174	hypothetical protein		-12.9958	1	0	0	0	0	0
FVEG_00063	-	1	6067944	hypothetical protein		0.584527	5	0	0	0	0	0
FVEG_00062	-	1	6070371	hypothetical protein		-15.8118	1	0	0	0	0	0
FVEG_00061	hypothetical protein FG03019.1 [Gibberella zeae PH-1]	1	6071675	hypothetical protein		27.3059	4	0	0	0	0	0
FVEG_00060	hypothetical protein FG03020.1 [Gibberella zeae PH-1]	1	6074138	hypothetical protein		0	1	0	0	0	0	0
FVEG_00059	hypothetical protein FG03020.1 [Gibberella zeae PH-1]	1	6075349	hypothetical protein		25.6356	4	0	0	0	0	0
FVEG_00058	hypothetical protein similar to nucleoside-diphosphate-sugar epimerase [Fusarium oxysporum f. sp. fragariae]	1	6076555	hypothetical protein		1.51083	5	0	0	0	0	0
FVEG_00057	hypothetical protein similar to beta-D-galactosidase [Fusarium oxysporum f. sp. fragariae]	1	6078179	hypothetical protein		30.7205	4	0	0	0	0	0
FVEG_00056	trichothecene 3-O-acetyltransferase [Fusarium nygamai]	1	6081554	hypothetical protein		0	1	0	0	0	0	0
FVEG_00055	hypothetical protein similar to CG15021 [Fusarium oxysporum f. sp. fragariae]	1	6083287	hypothetical protein		52.5432	4	0	0	0	0	0
FVEG_00054	hypothetical protein FG00099.1 [Gibberella zeae PH-1]	1	6087458	hypothetical protein		-35.6642	1	0	0	0	0	0
FVEG_00053	unnamed protein product [Podospora anserina S mat+]	1	6089766	hypothetical protein		1.65798	5	0	0	0	0	0
FVEG_00052	hypothetical protein NECHADRAFT_88423 [Nectria haematococca mpVI 77-13-4]_x0001_gb|EEU34813.1| hypothetical protein NECHADRAFT_88423 [Nectria haematococca mpVI 77-13-4]	1	6093482	hypothetical protein		49.8998	4	0	0	0	0	0
FVEG_00051	-	1	6095443	hypothetical protein		0	1	0	0	0	0	0
FVEG_00050	hypothetical protein FG00005.1 [Gibberella zeae PH-1]	1	6097087	hypothetical protein		58.6623	4	0	0	0	0	0
FVEG_00049	-	1	6098987	hypothetical protein		71.3772	4	0	0	0	0	0
FVEG_00048	hypothetical protein NECHADRAFT_95906 [Nectria haematococca mpVI 77-13-4]_x0001_gb|EEU37965.1| hypothetical protein NECHADRAFT_95906 [Nectria haematococca mpVI 77-13-4]	1	6102132	hypothetical protein		75.3278	4	0	0	0	0	0
FVEG_00047	hypothetical protein NECHADRAFT_86865 [Nectria haematococca mpVI 77-13-4]_x0001_gb|EEU35598.1| hypothetical protein NECHADRAFT_86865 [Nectria haematococca mpVI 77-13-4]	1	6103453	hypothetical protein		0	1	0	0	0	0	0
FVEG_00046	-	1	6106977	hypothetical protein		51.8165	4	0	0	0	0	0
FVEG_00045	predicted protein [Nectria haematococca mpVI 77-13-4]_x0001_gb|EEU44590.1| predicted protein [Nectria haematococca mpVI 77-13-4]	1	6110263	hypothetical protein		63.4021	4	0	0	0	0	0
FVEG_00044	glycosyl hydrolase family 81 [Glomerella graminicola M1.001]	1	6112333	hypothetical protein		-60.751	1	0	0	0	0	0
FVEG_00043	polysaccharide deacetylase family protein [Grosmannia clavigera kw1407]	1	6116309	hypothetical protein		57.2766	4	0	0	0	0	0
FVEG_00042	similar to beta-carotene 15 [Leptosphaeria maculans]	1	6117023	hypothetical protein		80.7616	4	0	0	0	0	0
FVEG_00041	predicted protein [Nectria haematococca mpVI 77-13-4]_x0001_gb|EEU38660.1| predicted protein [Nectria haematococca mpVI 77-13-4]	1	6119508	hypothetical protein		-54.9261	6	0	0	0	0	0
FVEG_00040	hscarg dehydrogenase, putative [Talaromyces stipitatus ATCC 10500]_x0001_gb|EED20545.1| hscarg dehydrogenase, putative [Talaromyces stipitatus ATCC 10500]	1	6123671	hypothetical protein		-23.0278	1	0	0	0	0	0
FVEG_00039	hypothetical protein FG07767.1 [Gibberella zeae PH-1]	1	6125861	hypothetical protein		-40.3245	6	0	0	0	0	0
FVEG_00038	hypothetical protein FG04658.1 [Gibberella zeae PH-1]	1	6127082	hypothetical protein		-45.4807	6	0	0	0	0	0
FVEG_00037	hypothetical protein FG04657.1 [Gibberella zeae PH-1]	1	6130949	hypothetical protein		53.3039	4	0	0	0	0	0
FVEG_00036	hypothetical protein FG03449.1 [Gibberella zeae PH-1]	1	6133214	hypothetical protein		-43.343	1	0	0	0	0	0
FVEG_00035	hypothetical protein FG03450.1 [Gibberella zeae PH-1]	1	6135601	hypothetical protein		67.5675	4	0	0	0	0	0
FVEG_00034	hypothetical protein NECHADRAFT_95010 [Nectria haematococca mpVI 77-13-4]_x0001_gb|EEU43443.1| hypothetical protein NECHADRAFT_95010 [Nectria haematococca mpVI 77-13-4]	1	6139351	hypothetical protein		79.7594	4	0	0	0	0	0
FVEG_00033	-	1	6140576	hypothetical protein		64.1116	4	0	0	0	0	0
FVEG_00032	-	1	6142053	hypothetical protein		-15.136	5	0	0	0	0	0
FVEG_00031	hypothetical protein FG07998.1 [Gibberella zeae PH-1]	1	6143983	hypothetical protein		8.52059	2	0	0	0	0	0
FVEG_00030	hypothetical protein FG01789.1 [Gibberella zeae PH-1]	1	6147223	hypothetical protein		-16.6007	5	0	0	0	0	0
FVEG_00029	hypothetical protein NECHADRAFT_106231 [Nectria haematococca mpVI 77-13-4]_x0001_gb|EEU34442.1| hypothetical protein NECHADRAFT_106231 [Nectria haematococca mpVI 77-13-4]	1	6150054	hypothetical protein		145.835	4	145.835	3	4	0	0
FVEG_00028	phthalate transporter [Metarhizium acridum CQMa 102]	1	6153712	hypothetical protein		0	1	145.835	3	4	0	0
FVEG_00027	hypothetical protein NECHADRAFT_51284 [Nectria haematococca mpVI 77-13-4]_x0001_gb|EEU35453.1| hypothetical protein NECHADRAFT_51284 [Nectria haematococca mpVI 77-13-4]	1	6156038	alkaline proteinase precursor		0	1	145.835	3	4	0	0
FVEG_00026	-	1	6158689	hypothetical protein		-27.0944	6	0	0	0	0	0
FVEG_00025	aldehyde reductase II [Aspergillus oryzae RIB40]_x0001_dbj|BAE55433.1| unnamed protein product [Aspergillus oryzae RIB40]	1	6161617	hypothetical protein		-32.2752	6	0	0	0	0	0
FVEG_00024	hypothetical protein FG10583.1 [Gibberella zeae PH-1]	1	6163539	hypothetical protein		-34.6173	3	0	0	0	0	0
FVEG_00023	predicted protein [Aspergillus terreus NIH2624]_x0001_gb|EAU35749.1| predicted protein [Aspergillus terreus NIH2624]	1	6164772	hypothetical protein		0	1	0	0	0	0	0
FVEG_00022	zinc-binding dehydrogenase [Glomerella graminicola M1.001]	1	6166696	hypothetical protein		-23.6463	6	0	0	0	0	0
FVEG_00021	hypothetical protein ANI_1_72184 [Aspergillus niger CBS 513.88]	1	6168774	hypothetical protein		-4.68304	5	0	0	0	0	0
[truncated: 11,872 more rows]

## Sheet: A.flavus
			From NCBI	Maximum score		Unique cluster (5%FPP:1016.7)			SMURF		172	145	224
Gene	Chromosome	Scaffold	Description/Known cluster	Score	cccID	Absolute score	Size	cccID	Type	ID	C6	P450	MFS
AFLA_054550	1	EQ963483	myo inositol dehydrogenase, putative	640.175	261	640.175	3	261	0	0	0	0	0
AFLA_054540	1	EQ963483	conserved hypothetical protein	-458.738	378	640.175	3	261	0	0	0	0	0
AFLA_054530	1	EQ963483	conserved hypothetical protein	-420.389	10	640.175	3	261	0	0	0	0	0
AFLA_054520	1	EQ963483	1-aminocyclopropane-1-carboxylate synthase, putative	-557.704	363	0	0	0	0	0	0	0	0
AFLA_054510	1	EQ963483	hypothetical protein	-1294.61	378	0	0	0	0	0	0	0	0
AFLA_054500	1	EQ963483	penicillin-binding protein, putative	-1204.9	366	0	0	0	0	0	0	0	0
AFLA_054490	1	EQ963483	neutral amino acid permease	-3712.8	378	0	0	0	0	0	0	0	0
AFLA_054480	1	EQ963483	conserved hypothetical protein	-5145.95	378	5145.95	3	378	0	0	0	0	0
AFLA_054470	1	EQ963483	class V chitinase Chi100	-236.825	346	5145.95	3	378	0	0	0	0	0
AFLA_054460	1	EQ963483	hypothetical protein	-255.331	346	5145.95	3	378	0	0	0	0	0
AFLA_054450	1	EQ963483	hypothetical protein	-351.572	121	0	0	0	0	0	0	0	0
AFLA_054440	1	EQ963483	hypothetical protein	379.568	12	0	0	0	0	0	0	0	0
AFLA_054430	1	EQ963483	2,4-dichlorophenol 6-monooxygenase, putative	-525.007	338	0	0	0	0	0	0	0	0
AFLA_054420	1	EQ963483	4-hydroxyphenylacetate degradation bifunctional isomerase/decarboxylase, putative	-635.486	338	0	0	0	0	0	0	0	0
AFLA_054410	1	EQ963483	conserved hypothetical protein	286.946	18	0	0	0	0	0	0	0	0
AFLA_054400	1	EQ963483	conserved hypothetical protein	-813.675	177	0	0	0	0	0	0	0	0
AFLA_054390	1	EQ963483	conserved hypothetical protein	-1422.73	177	1422.73	3	177	NRPS	17	0	0	0
AFLA_054380	1	EQ963483	hypothetical protein	-565.798	184	1422.73	3	177	NRPS	17	0	0	0
AFLA_054370	1	EQ963483	short-chain dehydrogenase, putative	417.53	12	1422.73	3	177	NRPS	17	0	0	0
AFLA_054360	1	EQ963483	conserved hypothetical protein	324.267	13	0	0	0	NRPS	17	0	0	0
AFLA_054350	1	EQ963483	actin-binding protein Fragmin, putative	474.892	10	0	0	0	NRPS	17	0	0	0
AFLA_054340	1	EQ963483	isoflavone reductase family protein	617.107	13	0	0	0	NRPS	17	0	0	0
AFLA_054330	1	EQ963483	conserved hypothetical protein	741.598	13	0	0	0	NRPS	17	0	0	0
AFLA_054320	1	EQ963483	NPP1 domain protein, putative	241.66	16	0	0	0	NRPS	17	0	0	0
AFLA_054310	1	EQ963483	conserved hypothetical protein	603.397	13	0	0	0	NRPS	17	0	0	0
AFLA_054300	1	EQ963483	pantothenate transporter, putative	943.273	13	943.273	4	13	NRPS	17	0	0	0
AFLA_054290	1	EQ963483	aldehyde reductase I (ARI), putative	168.516	137	943.273	4	13	NRPS	17	0	0	0
AFLA_054280	1	EQ963483	conserved hypothetical protein	115.331	18	943.273	4	13	NRPS	17	0	0	0
AFLA_054270	1	EQ963483	NRPS-like enzyme, putative	286.924	30	943.273	4	13	NRPS	17	0	0	0
AFLA_054260	1	EQ963483	MFS transporter, putative	94.761	324	94.761	3	324	NRPS	17	0	0	1
AFLA_054250	1	EQ963483	conserved hypothetical protein	76.965	264	94.761	3	324	NRPS	17	0	0	0
AFLA_054240	1	EQ963483	conserved hypothetical protein	19.7532	159	94.761	3	324	NRPS	17	0	0	0
AFLA_054230	1	EQ963483	conserved hypothetical protein	25.8803	369	0	0	0	NRPS	17	0	0	0
AFLA_054220	1	EQ963483	conserved hypothetical protein	30.2883	369	0	0	0	NRPS	17	0	0	0
AFLA_054210	1	EQ963483	ankyrin repeat-containing protein, putative	7.52445	354	0	0	0	NRPS	17	0	0	0
AFLA_054200	1	EQ963483	hypothetical protein	201.224	148	0	0	0	NRPS	17	0	0	0
AFLA_054190	1	EQ963483	conserved hypothetical protein	436.862	148	436.862	3	148	NRPS	17	0	0	0
AFLA_054180	1	EQ963483	conserved hypothetical protein	-37.1741	104	436.862	3	148	NRPS	17	0	0	0
AFLA_054170	1	EQ963483	MYB3r3, putative	13.8744	260	436.862	3	148	NRPS	17	0	0	0
AFLA_054160	1	EQ963483	hypothetical protein	52.3359	369	0	0	0	NRPS	17	0	0	0
AFLA_054150	1	EQ963483	cycloheximide resistance protein, putative	83.5851	256	0	0	0	NRPS	17	0	0	0
AFLA_054140	1	EQ963483	conserved hypothetical protein	-56.2416	293	0	0	0	0	0	0	0	0
AFLA_054130	1	EQ963483	MFS transporter, putative	-35.0432	280	0	0	0	0	0	0	0	1
AFLA_054120	1	EQ963483	DUF1212 domain membrane protein	45.3388	228	0	0	0	0	0	0	0	0
AFLA_054110	1	EQ963483	hypothetical protein	54.0426	229	0	0	0	0	0	0	0	0
AFLA_054100	1	EQ963483	DUF341 family oxidoreductase, putative	63.7398	229	0	0	0	0	0	0	0	0
AFLA_054090	1	EQ963483	polyketide synthase, putative	78.3198	231	0	0	0	PKS	16	0	0	0
AFLA_054080	1	EQ963483	Na(+)/H(+) antiporter, putative	133.59	229	0	0	0	PKS	16	0	0	0
AFLA_054070	1	EQ963483	conserved hypothetical protein	122.033	260	0	0	0	PKS	16	0	0	0
AFLA_054060	1	EQ963483	ATP/GTP-binding protein, putative	-35.0499	292	0	0	0	PKS	16	0	0	0
AFLA_054050	1	EQ963483	ABC multidrug transporter, putative	-30.7833	313	0	0	0	PKS	16	0	0	0
AFLA_054040	1	EQ963483	conserved hypothetical protein	-24.5265	293	0	0	0	PKS	16	0	0	0
AFLA_054030	1	EQ963483	hypothetical protein	-31.836	292	0	0	0	0	0	0	0	0
AFLA_054020	1	EQ963483	conserved hypothetical protein	-61.1793	137	0	0	0	0	0	0	0	0
AFLA_054010	1	EQ963483	siderochrome-iron transporter, putative	50.9208	113	0	0	0	0	0	0	0	0
AFLA_054000	1	EQ963483	hypothetical protein	154.727	113	0	0	0	0	0	0	0	0
AFLA_053990	1	EQ963483	class II aldolase/adducin domain protein	105.888	120	0	0	0	0	0	0	0	0
AFLA_053980	1	EQ963483	DUF636 domain protein	26.9534	135	0	0	0	0	0	0	0	0
AFLA_053970	1	EQ963483	hypothetical protein	218.2	113	0	0	0	0	0	0	0	0
AFLA_053960	1	EQ963483	fructose-bisphosphate aldolase, putative	-167.117	177	0	0	0	0	0	0	0	0
AFLA_053950	1	EQ963483	conserved hypothetical protein	241.098	113	0	0	0	0	0	0	0	0
AFLA_053940	1	EQ963483	multicopper oxidase, putative	267.016	113	0	0	0	0	0	0	0	0
AFLA_053930	1	EQ963483	multicopper oxidase, putative	215.176	113	0	0	0	0	0	0	0	0
AFLA_053920	1	EQ963483	hypothetical protein	-259.389	196	0	0	0	0	0	0	0	0
AFLA_053910	1	EQ963483	pantothenate transporter, putative	-59.8924	227	0	0	0	PKS	15	0	0	0
AFLA_053900	1	EQ963483	conserved hypothetical protein	-257.733	196	0	0	0	PKS	15	0	0	0
AFLA_053890	1	EQ963483	acetylcholinesterase, putative	-270.009	196	0	0	0	PKS	15	0	0	0
AFLA_053880	1	EQ963483	hypothetical protein	191.029	318	0	0	0	PKS	15	0	0	0
AFLA_053870	1	EQ963483	polyketide synthase, putative	129.364	347	0	0	0	PKS	15	0	0	0
AFLA_053860	1	EQ963483	hypothetical protein	-308.274	196	0	0	0	PKS	15	0	0	0
AFLA_053850	1	EQ963483	hypothetical protein	-415.845	247	0	0	0	PKS	15	0	0	0
AFLA_053840	1	EQ963483	conserved hypothetical protein	-591.807	247	0	0	0	PKS	15	0	0	0
AFLA_053830	1	EQ963483	MFS transporter Liz1/Seo1, putative	-1014.77	289	0	0	0	PKS	15	0	0	1
AFLA_053820	1	EQ963483	FAD dependent oxidoreductase, putative	-337.235	177	0	0	0	PKS	15	0	0	0
AFLA_053810	1	EQ963483	alpha-ketoglutarate-dependent taurine dioxygenase	-111.668	368	0	0	0	PKS	15	0	0	0
AFLA_053800	1	EQ963483	hypothetical protein	200.076	345	0	0	0	PKS	15	0	0	0
AFLA_053790	1	EQ963483	hypothetical protein	-207.031	367	0	0	0	PKS	15	0	0	0
AFLA_053780	1	EQ963483	PKS-like enzyme, putative	293.288	345	0	0	0	PKS	15	0	0	0
AFLA_053770	1	EQ963483	PKS-like enzyme, putative	351.456	345	0	0	0	PKS	15	0	0	0
AFLA_053760	1	EQ963483	hypothetical protein	464.522	345	0	0	0	PKS	15	0	0	0
AFLA_053750	1	EQ963483	hypothetical protein	453.506	113	0	0	0	0	0	0	0	0
AFLA_053740	1	EQ963483	conserved hypothetical protein	831.162	116	0	0	0	0	0	0	0	0
AFLA_053730	1	EQ963483	hypothetical protein	1427.34	116	1427.34	3	116	0	0	0	0	0
AFLA_053720	1	EQ963483	amino acid transporter, putative	1156.29	122	1427.34	3	116	0	0	0	0	0
AFLA_053710	1	EQ963483	conserved hypothetical protein	-1337.11	367	1427.34	3	116	0	0	0	0	0
AFLA_053700	1	EQ963483	conserved hypothetical protein	-1784.47	114	0	0	0	0	0	0	0	0
AFLA_053690	1	EQ963483	alpha-L-fucosidase 2 precursor, putative	-2118.78	115	2118.78	6	115	0	0	0	0	0
AFLA_053680	1	EQ963483	conserved hypothetical protein	-1161.55	104	2118.78	6	115	0	0	0	0	0
AFLA_053670	1	EQ963483	hypothetical protein	-1909.56	110	2118.78	6	115	0	0	0	0	0
AFLA_053660	1	EQ963483	nuclear transport factor 2 domain protein	-916.222	227	2118.78	6	115	0	0	0	0	0
AFLA_053650	1	EQ963483	oxidoreductase, short chain dehydrogenase/reductase family	-1760.16	110	2118.78	6	115	0	0	0	0	0
AFLA_053640	1	EQ963483	conserved hypothetical protein	-1551.46	110	2118.78	6	115	0	0	0	0	0
AFLA_053630	1	EQ963483	short-chain dehydrogenase, putative	-298.9	227	298.9	3	227	0	0	0	0	0
AFLA_053620	1	EQ963483	geranylgeranyl pyrophosphate synthase, putative	-122.03	374	298.9	3	227	0	0	0	0	0
AFLA_053610	1	EQ963483	conserved hypothetical protein	55.118	366	298.9	3	227	0	0	0	0	0
AFLA_053600	1	EQ963483	conserved hypothetical protein	-42.3653	5	0	0	0	0	0	0	0	0
AFLA_053590	1	EQ963483	hypothetical protein	59.9509	366	0	0	0	0	0	0	0	0
AFLA_053580	1	EQ963483	conserved hypothetical protein	62.978	366	0	0	0	0	0	0	0	0
AFLA_053570	1	EQ963483	conserved hypothetical protein	21.3648	233	0	0	0	0	0	0	0	0
AFLA_053560	1	EQ963483	conserved hypothetical protein	160.732	360	0	0	0	0	0	0	0	0
AFLA_053550	1	EQ963483	conserved hypothetical protein	-93.5294	31	0	0	0	0	0	0	0	0
AFLA_053540	1	EQ963483	FAD binding monooxygenase, putative	-86.3035	40	0	0	0	0	0	0	0	0
AFLA_053530	1	EQ963483	zeaxanthin epoxidase, putative	310.819	360	0	0	0	0	0	0	0	0
AFLA_053520	1	EQ963483	O-methyltransferase, putative	-130.828	31	0	0	0	0	0	0	0	0
AFLA_053510	1	EQ963483	conserved hypothetical protein	295.178	360	0	0	0	0	0	0	0	0
AFLA_053500	1	EQ963483	conserved hypothetical protein	-153.898	31	0	0	0	0	0	0	0	0
AFLA_053490	1	EQ963483	conserved hypothetical protein	-184.759	38	0	0	0	0	0	0	0	0
AFLA_053480	1	EQ963483	conserved hypothetical protein	430.307	360	0	0	0	0	0	0	0	0
AFLA_053470	1	EQ963483	cation-transporting ATPase, putative	-418.89	45	0	0	0	0	0	0	0	0
AFLA_053460	1	EQ963483	hypothetical protein	-498.37	45	0	0	0	0	0	0	0	0
AFLA_053450	1	EQ963483	conserved hypothetical protein	854.976	360	0	0	0	0	0	0	0	0
AFLA_053440	1	EQ963483	conserved hypothetical protein	-206.536	224	0	0	0	0	0	0	0	0
AFLA_053430	1	EQ963483	3-hydroxyacyl-CoA dehyrogenase, putative	871.036	360	0	0	0	0	0	0	0	0
AFLA_053420	1	EQ963483	low density lipoprotein receptor, putative	937.553	360	0	0	0	0	0	0	0	0
AFLA_053410	1	EQ963483	conserved hypothetical protein	-454.228	52	0	0	0	0	0	0	0	0
AFLA_053400	1	EQ963483	hypothetical protein	-890.028	38	0	0	0	0	0	0	0	0
AFLA_053390	1	EQ963483	GPI-anchored cell wall beta-1,3-endoglucanase EglC	-1199.42	45	0	0	0	0	0	0	0	0
AFLA_053380	1	EQ963483	hypothetical protein	935.085	360	0	0	0	0	0	0	0	0
AFLA_053370	1	EQ963483	conserved hypothetical protein	-1266.81	38	0	0	0	0	0	0	0	0
AFLA_053360	1	EQ963483	conserved hypothetical protein	-1581.4	38	0	0	0	0	0	0	0	0
AFLA_053350	1	EQ963483	conserved hypothetical protein	-1688.63	38	0	0	0	0	0	0	0	0
AFLA_053340	1	EQ963483	acetolactate synthase, putative	-1752.73	38	0	0	0	0	0	0	0	0
AFLA_053330	1	EQ963483	conserved hypothetical protein	1112.48	220	0	0	0	0	0	0	0	0
AFLA_053320	1	EQ963483	hypothetical protein	1952.72	222	0	0	0	0	0	0	0	0
AFLA_053310	1	EQ963483	vitamin H transporter, putative	2084.83	346	0	0	0	0	0	0	0	0
AFLA_053300	1	EQ963483	cytochrome P450, putative	-3986.01	46	0	0	0	0	0	0	1	0
AFLA_053290	1	EQ963483	hypothetical protein	6016.31	222	6016.31	3	222	0	0	0	0	0
AFLA_053280	1	EQ963483	conserved hypothetical protein	-1630.23	235	6016.31	3	222	0	0	0	0	0
AFLA_053270	1	EQ963483	ankyrin repeat-containing protein, putative	-1723.53	235	6016.31	3	222	0	0	0	0	0
AFLA_053260	1	EQ963483	conserved hypothetical protein	-732.975	233	0	0	0	0	0	0	0	0
AFLA_053250	1	EQ963483	conserved hypothetical protein	-1710.38	235	0	0	0	0	0	0	0	0
AFLA_053240	1	EQ963483	conserved hypothetical protein	-1167.83	234	0	0	0	0	0	0	0	0
AFLA_053230	1	EQ963483	conserved hypothetical protein	-1966.26	235	0	0	0	0	0	0	0	0
AFLA_053220	1	EQ963483	conserved hypothetical protein	-2522.89	235	0	0	0	0	0	0	0	0
AFLA_053210	1	EQ963483	aldehyde dehydrogenase, putative	-2521.57	235	0	0	0	0	0	0	0	0
AFLA_053200	1	EQ963483	homoserine dehydrogenase, putative	-2500.47	228	0	0	0	0	0	0	0	0
AFLA_053190	1	EQ963483	conserved hypothetical protein	3001.64	85	0	0	0	0	0	0	0	0
AFLA_053180	1	EQ963483	monocarboxylate permease, putative	4446.12	85	4446.12	3	85	0	0	0	0	0
AFLA_053170	1	EQ963483	methylenetetrahydrofolate dehydrogenase, putative	138.644	56	4446.12	3	85	0	0	0	0	0
AFLA_053160	1	EQ963483	conserved hypothetical protein	147.76	56	4446.12	3	85	0	0	0	0	0
AFLA_053150	1	EQ963483	hypothetical protein	141.814	56	0	0	0	0	0	0	0	0
AFLA_053140	1	EQ963483	aldolase, putative	-146.651	288	0	0	0	0	0	0	0	0
AFLA_053130	1	EQ963483	MFS transporter, putative	-131.167	246	0	0	0	0	0	0	0	1
AFLA_053120	1	EQ963483	conserved hypothetical protein	184.99	56	0	0	0	0	0	0	0	0
AFLA_053110	1	EQ963483	conserved hypothetical protein	-205.57	246	0	0	0	0	0	0	0	0
AFLA_053100	1	EQ963483	conserved hypothetical protein	221.942	226	0	0	0	0	0	0	0	0
AFLA_053090	1	EQ963483	conserved hypothetical protein	416.651	226	416.651	3	226	0	0	0	0	0
AFLA_053080	1	EQ963483	allergen Asp F4-like, putative	-311.267	243	416.651	3	226	0	0	0	0	0
AFLA_053070	1	EQ963483	yapsin, putative	103.074	65	416.651	3	226	0	0	0	0	0
AFLA_053060	1	EQ963483	peroxiredoxin 5, prdx5, putative	152.17	151	0	0	0	0	0	0	0	0
AFLA_053050	1	EQ963483	hypothetical protein	156.332	172	0	0	0	0	0	0	0	0
AFLA_053040	1	EQ963483	conserved hypothetical protein	-340.244	246	340.244	4	246	0	0	0	0	0
AFLA_053030	1	EQ963483	hscarg dehydrogenase, putative	44.2772	254	340.244	4	246	0	0	0	0	0
AFLA_053010	1	EQ963483	conserved hypothetical protein	-104.815	81	340.244	4	246	0	0	0	0	0
AFLA_053000	1	EQ963483	hypothetical protein	54.187	148	340.244	4	246	0	0	0	0	0
AFLA_052990	1	EQ963483	hypothetical protein	161.768	56	0	0	0	0	0	0	0	0
AFLA_052980	1	EQ963483	tryptophan permease, putative	126.845	275	0	0	0	0	0	0	0	0
AFLA_052970	1	EQ963483	hypothetical protein	182.549	254	0	0	0	0	0	0	0	0
AFLA_052960	1	EQ963483	glycosyl transferase family protein	121.22	56	0	0	0	0	0	0	0	0
AFLA_052950	1	EQ963483	conserved hypothetical protein	173.796	56	0	0	0	0	0	0	0	0
AFLA_052940	1	EQ963483	conserved hypothetical protein	160.692	275	0	0	0	0	0	0	0	0
AFLA_052930	1	EQ963483	3-ketosteroid-delta-1-dehydrogenase, putative	-57.9076	228	0	0	0	0	0	0	0	0
AFLA_052920	1	EQ963483	NGG1 interacting factor Nif3, putative	-81.9531	303	0	0	0	0	0	0	0	0
AFLA_052910	1	EQ963483	Golgi transport complex subunit Cog6, putative	-120.788	303	0	0	0	0	0	0	0	0
AFLA_052900	1	EQ963483	hypothetical protein	-243.134	302	243.134	3	302	0	0	0	0	0
AFLA_052890	1	EQ963483	prolyl-tRNA synthetase, putative	-191.839	88	243.134	3	302	0	0	0	0	0
AFLA_052880	1	EQ963483	aspartate aminotransferase, putative	-156.167	88	243.134	3	302	0	0	0	0	0
AFLA_052870	1	EQ963483	conserved hypothetical protein	-63.3685	69	0	0	0	0	0	0	0	0
AFLA_052860	1	EQ963483	chaperone/heat shock protein Hsp12, putative	54.103	363	0	0	0	0	0	0	0	0
AFLA_052850	1	EQ963483	conserved hypothetical protein	76.5222	362	76.5222	3	362	0	0	0	0	0
AFLA_052840	1	EQ963483	Ran-interacting protein Mog1, putative	-22.1308	330	76.5222	3	362	0	0	0	0	0
AFLA_052830	1	EQ963483	SprT family metallopeptidase, putative	-12.6946	101	76.5222	3	362	0	0	0	0	0
AFLA_052820	1	EQ963483	conserved hypothetical protein	-10.5138	88	0	0	0	0	0	0	0	0
AFLA_052810	1	EQ963483	1,3-beta-glucanosyltransferase, putative	-32.7112	159	0	0	0	0	0	0	0	0
AFLA_052800	1	EQ963483	1,3-beta-glucan synthase catalytic subunit FksP	-35.5874	159	0	0	0	0	0	0	0	0
AFLA_052790	1	EQ963483	serine palmitoyl CoA transferase subunit LcbA	-40.5021	159	0	0	0	0	0	0	0	0
AFLA_052780	1	EQ963483	cell wall glucanase (Scw4), putative	-31.7679	224	0	0	0	0	0	0	0	0
AFLA_052770	1	EQ963483	hypothetical protein	-53.8169	272	0	0	0	0	0	0	0	0
AFLA_052760	1	EQ963483	class I alpha-mannosidase 1A	-171.127	311	0	0	0	0	0	0	0	0
AFLA_052750	1	EQ963483	conserved hypothetical protein	-134.373	292	0	0	0	0	0	0	0	0
AFLA_052740	1	EQ963483	conserved hypothetical protein	-47.1578	165	0	0	0	0	0	0	0	0
AFLA_052730	1	EQ963483	muramidase, putative	-45.3949	365	0	0	0	0	0	0	0	0
AFLA_052720	1	EQ963483	autophagy protein Apg9, putative	-69.2834	165	0	0	0	0	0	0	0	0
AFLA_052710	1	EQ963483	GTPase activating protein (BUD2/CLA2), putative	256.586	374	256.586	3	374	0	0	0	0	0
AFLA_052700	1	EQ963483	WD domain protein	-123.298	166	256.586	3	374	0	0	0	0	0
AFLA_052690	1	EQ963483	conserved hypothetical protein	30.7799	358	256.586	3	374	0	0	0	0	0
AFLA_052680	1	EQ963483	hypothetical protein	130.155	227	130.155	3	227	0	0	0	0	0
AFLA_052670	1	EQ963483	RNA recognition motif (rrm) domain containing protein, putative	-88.6785	365	130.155	3	227	0	0	0	0	0
AFLA_052660	1	EQ963483	hypothetical protein	-87.5956	365	130.155	3	227	0	0	0	0	0
AFLA_052650	1	EQ963483	hypothetical protein	57.8854	358	0	0	0	0	0	0	0	0
AFLA_052640	1	EQ963483	PH domain protein	-99.8687	365	0	0	0	0	0	0	0	0
AFLA_052630	1	EQ963483	NADH-ubiquinone oxidoreductase 213 kDa subunit	-42.1665	366	0	0	0	0	0	0	0	0
AFLA_052620	1	EQ963483	ubiquitin C-terminal hydrolase, putative	-45.3659	366	0	0	0	0	0	0	0	0
AFLA_052610	1	EQ963483	succinyl-CoA:3-ketoacid-coenzyme A transferase (ScoT), putative	-36.7034	61	0	0	0	0	0	0	0	0
AFLA_052600	1	EQ963483	conserved hypothetical protein	-45.2792	61	0	0	0	0	0	0	0	0
AFLA_052590	1	EQ963483	metal homeostatis protein bsd2	-73.6481	365	0	0	0	0	0	0	0	0
AFLA_052580	1	EQ963483	conserved hypothetical protein	-21.1986	126	0	0	0	0	0	0	0	0
AFLA_052570	1	EQ963483	MAP kinase MpkA	-50.0504	365	0	0	0	0	0	0	0	0
AFLA_052560	1	EQ963483	conserved hypothetical protein	-25.7863	57	0	0	0	0	0	0	0	0
AFLA_052550	1	EQ963483	threonyl-tRNA synthetase, putative	-45.0388	365	0	0	0	0	0	0	0	0
AFLA_052540	1	EQ963483	conserved hypothetical protein	-52.5252	366	0	0	0	0	0	0	0	0
AFLA_052530	1	EQ963483	phosphatidylserine synthase	21.5672	253	0	0	0	0	0	0	0	0
AFLA_052520	1	EQ963483	hypothetical protein	125.447	179	0	0	0	0	0	0	0	0
AFLA_052510	1	EQ963483	WSC domain protein, putative	128.236	303	0	0	0	0	0	0	0	0
AFLA_052500	1	EQ963483	hypothetical protein	242.833	179	0	0	0	0	0	0	0	0
AFLA_052490	1	EQ963483	C2H2 finger domain protein, putative	-48.4419	82	0	0	0	0	0	0	0	0
AFLA_052480	1	EQ963483	conserved hypothetical protein	316.436	179	0	0	0	0	0	0	0	0
AFLA_052470	1	EQ963483	gamma-glutamyltranspeptidase	448.157	179	448.157	4	179	0	0	0	0	0
AFLA_052460	1	EQ963483	PE repeat family protein	359.444	179	448.157	4	179	0	0	0	0	0
AFLA_052450	1	EQ963483	MFS multidrug resistance transporter, putative	-86.1507	57	448.157	4	179	0	0	0	0	1
AFLA_052440	1	EQ963483	conserved hypothetical protein	28.6608	80	448.157	4	179	0	0	0	0	0
AFLA_052430	1	EQ963483	alpha,alpha-trehalase TreB/Nth1	-34.6271	365	34.6271	4	365	0	0	0	0	0
AFLA_052420	1	EQ963483	potassium uptake transporter, putative	8.69801	361	34.6271	4	365	0	0	0	0	0
AFLA_052410	1	EQ963483	OTU-like cysteine protease, putative	11.0432	163	34.6271	4	365	0	0	0	0	0
AFLA_052400	1	EQ963483	isocitrate lyase AcuD	-12.5185	278	34.6271	4	365	0	0	0	0	0
AFLA_052390	1	EQ963483	hypothetical protein	11.1107	193	0	0	0	0	0	0	0	0
AFLA_052380	1	EQ963483	aldehyde dehydrogenase, putative	-34.7848	73	0	0	0	0	0	0	0	0
AFLA_052370	1	EQ963483	AP-3 adaptor complex subunit mu, putative	-38.7097	73	0	0	0	0	0	0	0	0
AFLA_052360	1	EQ963483	conserved hypothetical protein	-43.3478	73	0	0	0	0	0	0	0	0
AFLA_052350	1	EQ963483	conserved hypothetical protein	-27.2675	59	0	0	0	0	0	0	0	0
AFLA_052340	1	EQ963483	SNF2 family helicase/ATPase, putative	-36.0527	73	0	0	0	0	0	0	0	0
AFLA_052330	1	EQ963483	hypothetical protein	-53.0209	277	0	0	0	0	0	0	0	0
AFLA_052320	1	EQ963483	aspartic endopeptidase (AP1), putative	-48.6914	138	0	0	0	0	0	0	0	0
AFLA_052310	1	EQ963483	RNA methyltransferase, TrmH family	-37.7199	264	0	0	0	0	0	0	0	0
AFLA_052300	1	EQ963483	chromatin remodeling complex subunit (Chd3), putative	-39.431	264	0	0	0	0	0	0	0	0
AFLA_052290	1	EQ963483	conserved hypothetical protein	51.3203	367	0	0	0	0	0	0	0	0
AFLA_052280	1	EQ963483	conserved hypothetical protein	-59.1683	62	0	0	0	0	0	0	0	0
AFLA_052270	1	EQ963483	glycosyltransferase family 28, putative	-102.041	62	102.041	3	62	0	0	0	0	0
AFLA_052260	1	EQ963483	actin-related protein ArpA	-82.1567	266	102.041	3	62	0	0	0	0	0
AFLA_052250	1	EQ963483	conserved hypothetical protein	-38.7842	19	102.041	3	62	0	0	0	0	0
AFLA_052240	1	EQ963483	C6 transcription factor, putative	-46.1819	18	0	0	0	0	0	1	0	0
AFLA_052230	1	EQ963483	U1 snRNP complex component Yhc1, putative	-27.6124	93	0	0	0	0	0	0	0	0
AFLA_052220	1	EQ963483	DUF907 domain protein	-37.0986	18	0	0	0	0	0	0	0	0
AFLA_052210	1	EQ963483	ATP-dependent RNA helicase, putative	-7.4647	325	0	0	0	0	0	0	0	0
AFLA_052200	1	EQ963483	hypothetical protein	-32.522	265	0	0	0	0	0	0	0	0
AFLA_052190	1	EQ963483	conserved hypothetical protein	-31.2149	18	0	0	0	0	0	0	0	0
AFLA_052180	1	EQ963483	conserved hypothetical protein	-6.05104	14	0	0	0	0	0	0	0	0
AFLA_052170	1	EQ963483	conserved hypothetical protein	-23.0539	18	0	0	0	0	0	0	0	0
AFLA_052160	1	EQ963483	metallo-beta-lactamase family protein	-26.0889	18	0	0	0	0	0	0	0	0
AFLA_052150	1	EQ963483	hypothetical protein	-29.5684	18	0	0	0	0	0	0	0	0
AFLA_052140	1	EQ963483	conserved hypothetical protein	-9.28371	77	0	0	0	0	0	0	0	0
AFLA_052130	1	EQ963483	hypothetical protein	-41.3652	93	0	0	0	0	0	0	0	0
AFLA_052120	1	EQ963483	conserved hypothetical protein	-19.7612	8	0	0	0	0	0	0	0	0
AFLA_052110	1	EQ963483	hypothetical protein	-64.6802	93	0	0	0	0	0	0	0	0
AFLA_052100	1	EQ963483	HAD superfamily hydrolase, putative	-22.75	154	0	0	0	0	0	0	0	0
AFLA_052090	1	EQ963483	zinc knuckle domain protein	-174.651	93	0	0	0	0	0	0	0	0
AFLA_052080	1	EQ963483	conserved hypothetical protein	-256.246	93	256.246	5	93	0	0	0	0	0
AFLA_052070	1	EQ963483	unfolded protein response protein Orm1, putative	-48.3439	155	256.246	5	93	0	0	0	0	0
AFLA_052060	1	EQ963483	conserved hypothetical protein	-187.101	93	256.246	5	93	0	0	0	0	0
AFLA_052050	1	EQ963483	calponin domain-containing protein, putative	-65.5163	154	256.246	5	93	0	0	0	0	0
AFLA_052040	1	EQ963483	conserved hypothetical protein	-96.8668	154	256.246	5	93	0	0	0	0	0
AFLA_052030	1	EQ963483	developmental regulatory protein WetA	-10.5578	67	0	0	0	0	0	0	0	0
AFLA_052020	1	EQ963483	conserved hypothetical protein	-33.3757	167	0	0	0	0	0	0	0	0
AFLA_052010	1	EQ963483	conserved hypothetical protein	-44.0225	97	0	0	0	0	0	0	0	0
AFLA_052000	1	EQ963483	COPII-coated vesicle membrane protein, putative	-64.4176	102	0	0	0	0	0	0	0	0
AFLA_051990	1	EQ963483	TPR repeat protein	-21.8987	93	0	0	0	0	0	0	0	0
AFLA_051980	1	EQ963483	G-protein complex beta subunit CpcB	-102.929	97	0	0	0	0	0	0	0	0
AFLA_051970	1	EQ963483	TPR domain protein	-221.137	102	221.137	3	102	0	0	0	0	0
AFLA_051960	1	EQ963483	DUF159 domain protein	-33.8066	59	221.137	3	102	0	0	0	0	0
AFLA_051950	1	EQ963483	conserved hypothetical protein	-16.5002	148	221.137	3	102	0	0	0	0	0
AFLA_051940	1	EQ963483	conserved hypothetical protein	40.705	220	40.705	3	220	0	0	0	0	0
AFLA_051930	1	EQ963483	glutamine synthetase	14.9091	288	40.705	3	220	0	0	0	0	0
AFLA_051920	1	EQ963483	MFS transporter, putative	4.63595	290	40.705	3	220	0	0	0	0	1
AFLA_051910	1	EQ963483	hypothetical protein	-23.34	301	0	0	0	0	0	0	0	0
AFLA_051900	1	EQ963483	zinc knuckle transcription factor (CnjB), putative	8.72719	15	0	0	0	0	0	0	0	0
AFLA_051890	1	EQ963483	MFS monosaccharide transporter, putative	-42.2997	301	42.2997	4	301	0	0	0	0	1
AFLA_051880	1	EQ963483	conserved hypothetical protein	17.4545	176	42.2997	4	301	0	0	0	0	0
AFLA_051870	1	EQ963483	succinate semialdehyde dehydrogenase, putative	41.094	246	42.2997	4	301	0	0	0	0	0
AFLA_051860	1	EQ963483	conserved hypothetical protein	-15.8131	56	42.2997	4	301	0	0	0	0	0
AFLA_051850	1	EQ963483	conserved hypothetical protein	15.5008	178	0	0	0	0	0	0	0	0
AFLA_051840	1	EQ963483	tubulin beta subunit	-39.8322	56	0	0	0	0	0	0	0	0
AFLA_051830	1	EQ963483	conserved hypothetical protein	-44.8162	58	0	0	0	0	0	0	0	0
AFLA_051820	1	EQ963483	clathrin-coated vesicle protein, putative	-69.1919	148	0	0	0	0	0	0	0	0
AFLA_051810	1	EQ963483	citrate lyase beta subunit, putative	-93.0621	148	0	0	0	0	0	0	0	0
AFLA_051800	1	EQ963483	CCCH zinc finger and SMR domain protein	18.1956	302	0	0	0	0	0	0	0	0
AFLA_051790	1	EQ963483	conserved hypothetical protein	-101.484	148	0	0	0	0	0	0	0	0
AFLA_051780	1	EQ963483	lysine-specific histone demethylase Aof2, putative	28.7158	302	0	0	0	0	0	0	0	0
AFLA_051770	1	EQ963483	thioredoxin reductase Trr1/Trr2, putative	-44.683	148	0	0	0	0	0	0	0	0
AFLA_051760	1	EQ963483	conserved hypothetical protein	-62.4398	56	0	0	0	0	0	0	0	0
AFLA_051750	1	EQ963483	pheromone processing endoprotease Kex2	-47.4179	57	0	0	0	0	0	0	0	0
AFLA_051740	1	EQ963483	vacuolar targeting protein Atg24, putative	-50.0012	56	0	0	0	0	0	0	0	0
AFLA_051730	1	EQ963483	conserved hypothetical protein	-58.7507	148	0	0	0	0	0	0	0	0
AFLA_051720	1	EQ963483	ubiquinone biosynthesis monooxgenase (Coq6), putative	-51.2886	56	0	0	0	0	0	0	0	0
AFLA_051710	1	EQ963483	histidyl-tRNA synthetase, mitochondrial precursor	-59.6756	56	0	0	0	0	0	0	0	0
AFLA_051700	1	EQ963483	DNA repair protein Rad50	29.8379	248	0	0	0	0	0	0	0	0
AFLA_051690	1	EQ963483	cutinase gene palindrome-binding protein, putative	49.6709	302	0	0	0	0	0	0	0	0
AFLA_051680	1	EQ963483	conserved hypothetical protein	-8.5984	152	0	0	0	0	0	0	0	0
AFLA_051670	1	EQ963483	conserved hypothetical protein	77.5371	302	0	0	0	0	0	0	0	0
AFLA_051660	1	EQ963483	phosphoesterase, putative	-76.2703	275	0	0	0	0	0	0	0	0
AFLA_051650	1	EQ963483	Phosphoserine phosphatase, putative	116.628	302	116.628	7	302	0	0	0	0	0
AFLA_051640	1	EQ963483	tRNA (adenine-N(1)-)-methyltransferase	-63.7145	156	116.628	7	302	0	0	0	0	0
AFLA_051630	1	EQ963483	transcription factor, putative	100.942	302	116.628	7	302	0	0	0	0	0
AFLA_051620	1	EQ963483	SAM binding motif containing protein	111.367	302	116.628	7	302	0	0	0	0	0
AFLA_051610	1	EQ963483	hypothetical protein	-32.69	324	116.628	7	302	0	0	0	0	0
AFLA_051600	1	EQ963483	ubiquitination network signaling protein, putative	-49.5791	275	116.628	7	302	0	0	0	0	0
AFLA_051590	1	EQ963483	dihydrofolate synthase/folylpolyglutamate synthase, putative	-32.3621	324	116.628	7	302	0	0	0	0	0
AFLA_051580	1	EQ963483	oxidoreductase, putative	-34.8369	324	0	0	0	0	0	0	0	0
AFLA_051570	1	EQ963483	50S ribosomal protein L36, putative	28.701	178	0	0	0	0	0	0	0	0
AFLA_051560	1	EQ963483	vacuolar protein sorting-associated protein Vps5, putative	43.8153	375	0	0	0	0	0	0	0	0
AFLA_051550	1	EQ963483	class II aldolase/adducin domain protein	47.4559	375	0	0	0	0	0	0	0	0
AFLA_051540	1	EQ963483	calnexin	55.9071	375	0	0	0	0	0	0	0	0
AFLA_051530	1	EQ963483	methylmalonate-semialdehyde dehydrogenase, putative	59.9641	248	0	0	0	0	0	0	0	0
AFLA_051520	1	EQ963483	conserved hypothetical protein	65.2387	248	0	0	0	0	0	0	0	0
AFLA_051510	1	EQ963483	dynactin subunit, putative	37.6499	377	0	0	0	0	0	0	0	0
AFLA_051500	1	EQ963483	alpha-1,6-mannosyltransferase subunit (Ecm39), putative	-20.1666	143	0	0	0	0	0	0	0	0
AFLA_051490	1	EQ963483	hypothetical protein	-130.497	93	0	0	0	0	0	0	0	0
AFLA_051480	1	EQ963483	ubiquitin C-terminal hydrolase CreB	167.273	56	0	0	0	0	0	0	0	0
AFLA_051470	1	EQ963483	short chain alcohol dehydrogenase, putative	-49.3103	254	0	0	0	0	0	0	0	0
AFLA_051460	1	EQ963483	vitamin H transporter, putative	28.2149	377	0	0	0	0	0	0	0	0
AFLA_051450	1	EQ963483	hypothetical protein	-63.3091	254	0	0	0	0	0	0	0	0
AFLA_051440	1	EQ963483	fructose-bisphosphate aldolase, putative	-68.9124	254	0	0	0	0	0	0	0	0
AFLA_051430	1	EQ963483	DNA repair protein Rad1, putative	-74.1338	57	0	0	0	0	0	0	0	0
AFLA_051420	1	EQ963483	histone acetyltransferase (Gcn5), putative	-78.4821	346	0	0	0	0	0	0	0	0
AFLA_051410	1	EQ963483	RGS domain protein (Rax1), putative	-108.678	254	0	0	0	0	0	0	0	0
AFLA_051400	1	EQ963483	COP9 signalosome subunit 7 (CsnG), putative	-108.68	346	0	0	0	0	0	0	0	0
AFLA_051390	1	EQ963483	copper-transporting ATPase, putative	-116.207	308	0	0	0	0	0	0	0	0
AFLA_051380	1	EQ963483	conserved hypothetical protein	-99.8239	184	0	0	0	0	0	0	0	0
AFLA_051370	1	EQ963483	phosphoribosyl-aminoimidazole carboxylase	-192.587	254	0	0	0	0	0	0	0	0
AFLA_051360	1	EQ963483	conserved hypothetical protein	-51.1938	364	0	0	0	0	0	0	0	0
AFLA_051350	1	EQ963483	C6 transcription factor, putative	-186.322	254	0	0	0	0	0	1	0	0
AFLA_051340	1	EQ963483	C6 transcription factor, putative	-177.156	346	0	0	0	0	0	1	0	0
AFLA_051330	1	EQ963483	alpha-ketoglutarate-dependent sulfonate dioxygenase, putative	-187.077	121	0	0	0	0	0	0	0	0
AFLA_051320	1	EQ963483	pantothenate transporter, putative	-222.496	254	0	0	0	0	0	0	0	0
AFLA_051310	1	EQ963483	glucose-methanol-choline (gmc) oxidoreductase, putative	-267.417	254	0	0	0	0	0	0	0	0
AFLA_051300	1	EQ963483	L-serine dehydratase, putative	56.697	217	0	0	0	0	0	0	0	0
AFLA_051290	1	EQ963483	conserved hypothetical protein	-159.003	121	0	0	0	0	0	0	0	0
AFLA_051280	1	EQ963483	hypothetical protein	-170.986	121	0	0	0	0	0	0	0	0
AFLA_051270	1	EQ963483	DnaJ and TPR domain protein	189.273	217	0	0	0	0	0	0	0	0
AFLA_051260	1	EQ963483	conserved hypothetical protein	-247.563	121	0	0	0	0	0	0	0	0
AFLA_051250	1	EQ963483	GPI anchored serine-rich protein	-101.423	91	0	0	0	0	0	0	0	0
AFLA_051240	1	EQ963483	MAP kinase kinase (Mkk2), putative	-349.855	121	0	0	0	0	0	0	0	0
AFLA_051230	1	EQ963483	protein transport protein Sec39, putative	-328.469	221	0	0	0	0	0	0	0	0
AFLA_051220	1	EQ963483	conserved hypothetical protein	-139.622	219	0	0	0	0	0	0	0	0
AFLA_051210	1	EQ963483	TBP associated factor (Mot1), putative	-596.819	121	0	0	0	0	0	0	0	0
AFLA_051200	1	EQ963483	conserved hypothetical protein	-772.133	221	0	0	0	0	0	0	0	0
AFLA_051190	1	EQ963483	zinc binding dehydrogenase, putative	-1021.87	221	0	0	0	0	0	0	0	0
AFLA_051180	1	EQ963483	erythromycin esterase, putative	-1267.68	224	1267.68	3	224	0	0	0	0	0
AFLA_051170	1	EQ963483	hypothetical protein	-478.775	146	1267.68	3	224	0	0	0	0	0
AFLA_051160	1	EQ963483	conserved hypothetical protein	-201.875	164	1267.68	3	224	0	0	0	0	0
AFLA_051150	1	EQ963483	inositol phospholipid biosynthesis protein Scs3, putative	-231.17	143	231.17	6	143	0	0	0	0	0
AFLA_051140	1	EQ963483	beta-glucosidase, putative	-226.7	143	231.17	6	143	0	0	0	0	0
AFLA_051130	1	EQ963483	15-hydroxyprostaglandin dehydrogenase (NAD(+))	-150.555	308	231.17	6	143	0	0	0	0	0
AFLA_051120	1	EQ963483	conserved hypothetical protein	-70.3907	269	231.17	6	143	0	0	0	0	0
AFLA_051110	1	EQ963483	conserved hypothetical protein	-42.7189	146	231.17	6	143	0	0	0	0	0
AFLA_051100	1	EQ963483	C6 transcription factor, putative	-25.8631	146	231.17	6	143	0	0	1	0	0
AFLA_051090	1	EQ963483	vacuolar sorting receptor (Mrl1), putative	28.652	192	0	0	0	0	0	0	0	0
AFLA_051080	1	EQ963483	c-14 sterol reductase	30.9696	192	0	0	0	0	0	0	0	0
AFLA_051070	1	EQ963483	tRNA-specific adenosine deaminase, putative	-18.108	142	0	0	0	0	0	0	0	0
AFLA_051060	1	EQ963483	splicing factor 3B subunit 10 (SF3b10), putative	-97.2907	69	0	0	0	0	0	0	0	0
AFLA_051050	1	EQ963483	conserved hypothetical protein	32.8201	210	0	0	0	0	0	0	0	0
AFLA_051040	1	EQ963483	conserved hypothetical protein	198.116	205	198.116	3	205	0	0	0	0	0
AFLA_051030	1	EQ963483	conserved hypothetical protein	116.534	220	198.116	3	205	0	0	0	0	0
AFLA_051020	1	EQ963483	conserved hypothetical protein	26.0063	210	198.116	3	205	0	0	0	0	0
AFLA_051010	1	EQ963483	conserved hypothetical protein	87.2105	56	0	0	0	0	0	0	0	0
AFLA_051000	1	EQ963483	nuclear-mitochondrial protein Rmp1, putative	-96.5388	292	0	0	0	0	0	0	0	0
AFLA_050990	1	EQ963483	conserved hypothetical protein	-134.113	292	134.113	3	292	0	0	0	0	0
AFLA_050980	1	EQ963483	NmrA-like family protein	14.0513	196	134.113	3	292	0	0	0	0	0
AFLA_050970	1	EQ963483	fungal specific transcription factor, putative	31.9428	198	134.113	3	292	0	0	0	0	0
AFLA_050960	1	EQ963483	protein phosphatase	22.9007	210	0	0	0	0	0	0	0	0
AFLA_050950	1	EQ963483	40S ribosomal protein S3, putative	37.5813	198	0	0	0	0	0	0	0	0
AFLA_050940	1	EQ963483	phenylalanyl-tRNA synthetase, beta subunit	-22.7842	107	0	0	0	0	0	0	0	0
AFLA_050930	1	EQ963483	protein phosphotase 2a 65kd regulatory subunit	58.0847	222	0	0	0	0	0	0	0	0
AFLA_050920	1	EQ963483	conserved hypothetical protein	71.2463	216	0	0	0	0	0	0	0	0
AFLA_050910	1	EQ963483	capsule-associated protein CAP1, putative	104.912	222	0	0	0	0	0	0	0	0
AFLA_050900	1	EQ963483	cysteine dioxygenase, putative	127.35	222	0	0	0	0	0	0	0	0
AFLA_050890	1	EQ963483	GTP binding protein, putative	153.201	222	0	0	0	0	0	0	0	0
AFLA_050880	1	EQ963483	conserved hypothetical protein	172.314	222	172.314	6	222	0	0	0	0	0
AFLA_050870	1	EQ963483	conserved hypothetical protein	-72.2824	101	172.314	6	222	0	0	0	0	0
AFLA_050860	1	EQ963483	conserved hypothetical protein	-72.1455	57	172.314	6	222	0	0	0	0	0
AFLA_050850	1	EQ963483	PXA domain protein	-48.1595	54	172.314	6	222	0	0	0	0	0
AFLA_050830	1	EQ963483	uridine nucleosidase Urh1, putative	61.2069	313	172.314	6	222	0	0	0	0	0
AFLA_050820	1	EQ963483	mandelate racemase/muconate lactonizing enzyme family protein	-58.7649	63	172.314	6	222	0	0	0	0	0
AFLA_050810	1	EQ963483	conserved hypothetical protein	81.1494	313	0	0	0	0	0	0	0	0
AFLA_050800	1	EQ963483	40S ribosomal protein S12	-61.1496	136	0	0	0	0	0	0	0	0
AFLA_050790	1	EQ963483	histone deacetylase complex subunit (Hos4), putative	90.4483	313	0	0	0	0	0	0	0	0
AFLA_050780	1	EQ963483	dfg10 protein, putative	-70.6284	63	0	0	0	0	0	0	0	0
AFLA_050770	1	EQ963483	conserved hypothetical protein	-61.3649	136	0	0	0	0	0	0	0	0
AFLA_050760	1	EQ963483	peptidyl-prolyl cis-trans isomerase	112.804	313	0	0	0	0	0	0	0	0
AFLA_050750	1	EQ963483	UDP-Glc/Gal endoplasmic reticulum nucleotide sugar transporter	-75.6622	126	0	0	0	0	0	0	0	0
AFLA_050740	1	EQ963483	conserved hypothetical protein	-75.0754	136	0	0	0	0	0	0	0	0
AFLA_050730	1	EQ963483	transcription factor SipA3, putative	156.705	313	0	0	0	0	0	0	0	0
AFLA_050720	1	EQ963483	ribosome biogenesis protein Kri1	-17.6864	72	0	0	0	0	0	0	0	0
AFLA_050710	1	EQ963483	hypothetical protein	149.83	313	0	0	0	0	0	0	0	0
AFLA_050700	1	EQ963483	hypothetical protein	170.688	313	0	0	0	0	0	0	0	0
AFLA_050690	1	EQ963483	mitochondrial ADP,ATP carrier protein (Ant), putative	153.056	373	0	0	0	0	0	0	0	0
AFLA_050680	1	EQ963483	conserved hypothetical protein	259.22	373	0	0	0	0	0	0	0	0
AFLA_050670	1	EQ963483	CAIB/BAIF family enzyme	255.753	313	0	0	0	0	0	0	0	0
AFLA_050660	1	EQ963483	conserved hypothetical protein	-33.9694	55	0	0	0	0	0	0	0	0
AFLA_050650	1	EQ963483	40S ribosomal protein S19	161.788	313	0	0	0	0	0	0	0	0
AFLA_050640	1	EQ963483	dual specificity phosphatase catalytic domain protein	-187.116	57	0	0	0	0	0	0	0	0
AFLA_050630	1	EQ963483	mitochondrial dihydroxy acid dehydratase, putative	-285.655	54	0	0	0	0	0	0	0	0
AFLA_050620	1	EQ963483	peroxisome biosynthesis protein (Peroxin-2), putative	-357.246	57	357.246	4	57	0	0	0	0	0
AFLA_050610	1	EQ963483	acid phosphatase PHOa	-222.003	377	357.246	4	57	0	0	0	0	0
AFLA_050600	1	EQ963483	betaine-aldehyde dehydrogenase, putative	-209.729	56	357.246	4	57	0	0	0	0	0
AFLA_050590	1	EQ963483	conserved hypothetical protein	139.776	313	357.246	4	57	0	0	0	0	0
AFLA_050580	1	EQ963483	importin 11, putative	128.208	313	0	0	0	0	0	0	0	0
AFLA_050570	1	EQ963483	WD repeat-containing protein	165.278	313	165.278	3	313	0	0	0	0	0
AFLA_050560	1	EQ963483	conserved hypothetical protein	101.679	206	165.278	3	313	0	0	0	0	0
AFLA_050550	1	EQ963483	DNA replication helicase Dna2, putative	-18.7165	365	165.278	3	313	0	0	0	0	0
AFLA_050540	1	EQ963483	conserved hypothetical protein	58.3172	224	0	0	0	0	0	0	0	0
AFLA_050530	1	EQ963483	nitrilase, putitive	32.8746	362	0	0	0	0	0	0	0	0
AFLA_050520	1	EQ963483	exosome complex exonuclease exoribonuclease (Rrp44), putative	84.4323	206	0	0	0	0	0	0	0	0
AFLA_050510	1	EQ963483	MFS transporter (Mch2), putative	115.044	206	0	0	0	0	0	0	0	1
AFLA_050500	1	EQ963483	LIM domain protein	137.502	224	137.502	6	224	0	0	0	0	0
AFLA_050490	1	EQ963483	methyltransferase-like protein 1	-57.2849	365	137.502	6	224	0	0	0	0	0
AFLA_050480	1	EQ963483	ESCRT-II complex component (Vps25), putative	103.41	206	137.502	6	224	0	0	0	0	0
AFLA_050470	1	EQ963483	DNA repair protein Rtt107, putative	-110.923	261	137.502	6	224	0	0	0	0	0
AFLA_050460	1	EQ963483	hypothetical protein	-86.2421	135	137.502	6	224	0	0	0	0	0
AFLA_050450	1	EQ963483	toxin biosynthesis protein, putative	-118.289	137	137.502	6	224	0	0	0	0	0
AFLA_050440	1	EQ963483	alkaline dihydroceramidase Ydc1, putative	90.3573	378	90.3573	3	378	0	0	0	0	0
AFLA_050430	1	EQ963483	alkaline phytoceramidase, putative	-43.4867	365	90.3573	3	378	0	0	0	0	0
AFLA_050420	1	EQ963483	mitochondrial carrier protein, putative	54.5386	358	90.3573	3	378	0	0	0	0	0
AFLA_050410	1	EQ963483	myosin heavy chain, clone, putative	22.2299	54	0	0	0	0	0	0	0	0
AFLA_050400	1	EQ963483	conserved hypothetical protein	41.0124	358	0	0	0	0	0	0	0	0
AFLA_050390	1	EQ963483	conserved hypothetical protein	-43.1901	365	0	0	0	0	0	0	0	0
AFLA_050380	1	EQ963483	conserved hypothetical protein	-29.717	151	0	0	0	0	0	0	0	0
AFLA_050370	1	EQ963483	prefoldin subunit 1, putative	-79.6586	148	0	0	0	0	0	0	0	0
AFLA_050360	1	EQ963483	gibberellin 20-oxidase, putative	23.7587	346	0	0	0	0	0	0	0	0
AFLA_050350	1	EQ963483	conserved hypothetical protein	-81.0128	82	0	0	0	0	0	0	0	0
AFLA_050340	1	EQ963483	conserved hypothetical protein	66.9851	228	0	0	0	0	0	0	0	0
AFLA_050330	1	EQ963483	cell differentiation protein (Rcd1), putative	45.4015	259	0	0	0	0	0	0	0	0
AFLA_050320	1	EQ963483	hypothetical protein	-273.623	82	0	0	0	0	0	0	0	0
AFLA_050310	1	EQ963483	PHD finger domain protein, putative	-596.309	82	0	0	0	0	0	0	0	0
AFLA_050300	1	EQ963483	HMG box protein, putative	-600.327	148	600.327	3	148	0	0	0	0	0
AFLA_050290	1	EQ963483	amidohydrolase family protein	39.2849	373	600.327	3	148	0	0	0	0	0
AFLA_050280	1	EQ963483	sulfate transporter family protein	-8.54233	10	600.327	3	148	0	0	0	0	0
AFLA_050270	1	EQ963483	conserved lysine-rich protein, putative	-5.26972	7	0	0	0	0	0	0	0	0
AFLA_050260	1	EQ963483	hypothetical protein	-24.8397	219	0	0	0	0	0	0	0	0
AFLA_050250	1	EQ963483	bZIP transcription factor CpcA	-36.8384	219	0	0	0	0	0	0	0	0
AFLA_050240	1	EQ963483	asparagine synthase related protein	48.5003	378	0	0	0	0	0	0	0	0
AFLA_050230	1	EQ963483	guanine nucleotide exchange factor Vps9, putative	-95.3308	224	95.3308	3	224	0	0	0	0	0
AFLA_050220	1	EQ963483	conserved hypothetical protein	14.921	113	95.3308	3	224	0	0	0	0	0
AFLA_050210	1	EQ963483	conserved hypothetical protein	22.7064	56	95.3308	3	224	0	0	0	0	0
AFLA_050200	1	EQ963483	conserved hypothetical protein	-24.6739	373	0	0	0	0	0	0	0	0
AFLA_050190	1	EQ963483	hypothetical protein	31.0576	68	0	0	0	0	0	0	0	0
AFLA_050180	1	EQ963483	calcium transporter, putative	43.0482	64	43.0482	4	64	0	0	0	0	0
AFLA_050170	1	EQ963483	dimethylaniline monooxygenase, putative	-8.43642	26	43.0482	4	64	0	0	0	0	0
AFLA_050160	1	EQ963483	exopolygalacturonase precursor, putative	-20.1696	137	43.0482	4	64	0	0	0	0	0
AFLA_050150	1	EQ963483	extracellular exo-polygalacturonase, putative	-10.5946	92	43.0482	4	64	0	0	0	0	0
AFLA_050140	1	EQ963483	alpha-L-rhamnosidase B, putative	-38.7523	137	38.7523	24	137	0	0	0	0	0
AFLA_050130	1	EQ963483	conserved hypothetical protein	-8.43289	126	38.7523	24	137	0	0	0	0	0
AFLA_050120	1	EQ963483	glutaredoxin Grx1, putative	-26.8283	93	38.7523	24	137	0	0	0	0	0
AFLA_050110	1	EQ963483	conserved hypothetical protein	-35.7098	93	38.7523	24	137	0	0	0	0	0
AFLA_050100	1	EQ963483	LMBR1 domain protein	-17.3673	158	38.7523	24	137	0	0	0	0	0
AFLA_050090	1	EQ963483	hypothetical protein	-24.2752	92	38.7523	24	137	0	0	0	0	0
AFLA_050080	1	EQ963483	conserved hypothetical protein	-34.482	137	38.7523	24	137	0	0	0	0	0
AFLA_050070	1	EQ963483	nucleotide-sugar transporter, putative	-33.9921	137	38.7523	24	137	0	0	0	0	0
AFLA_050060	1	EQ963483	sterol o-acyltransferase (APE2), putative	-13.8569	82	38.7523	24	137	0	0	0	0	0
AFLA_050050	1	EQ963483	AP-1 adaptor complex subunit gamma, putative	-33.5917	92	38.7523	24	137	0	0	0	0	0
AFLA_050040	1	EQ963483	DnaJ domain protein	-29.5532	102	38.7523	24	137	0	0	0	0	0
AFLA_050030	1	EQ963483	conserved hypothetical protein	-27.1569	313	38.7523	24	137	0	0	0	0	0
AFLA_050020	1	EQ963483	Ser/Thr protein phosphatase family protein	-34.7713	158	38.7523	24	137	0	0	0	0	0
AFLA_050010	1	EQ963483	8-amino-7-oxononanoate synthase, putative	15.4641	305	38.7523	24	137	0	0	0	0	0
AFLA_050000	1	EQ963483	ribosomal protein L16a	-24.6552	137	38.7523	24	137	0	0	0	0	0
AFLA_049990	1	EQ963483	AMP-binding domain protein, putative	-35.1291	137	38.7523	24	137	0	0	0	0	0
AFLA_049980	1	EQ963483	ubiquitin ligase complex F-box protein GRR1, putative	-35.7545	137	38.7523	24	137	0	0	0	0	0
AFLA_049970	1	EQ963483	Peptidase family M28 family	-33.1186	137	38.7523	24	137	0	0	0	0	0
AFLA_049960	1	EQ963483	integral membrane protein	-5.96275	348	38.7523	24	137	0	0	0	0	0
AFLA_049950	1	EQ963483	hypothetical protein	-28.9111	358	38.7523	24	137	0	0	0	0	0
AFLA_049940	1	EQ963483	G1/S-specific cyclin Pcl5, putative	24.5503	80	38.7523	24	137	0	0	0	0	0
AFLA_049930	1	EQ963483	conserved hypothetical protein	-34.1943	358	38.7523	24	137	0	0	0	0	0
AFLA_049920	1	EQ963483	dienelactone hydrolase family protein	25.4736	305	38.7523	24	137	0	0	0	0	0
AFLA_049910	1	EQ963483	conserved hypothetical protein	-9.13893	172	38.7523	24	137	0	0	0	0	0
AFLA_049900	1	EQ963483	hypothetical protein	-45.3534	358	0	0	0	0	0	0	0	0
AFLA_049890	1	EQ963483	hypothetical protein	-9.87989	300	0	0	0	0	0	0	0	0
AFLA_049880	1	EQ963483	hypothetical protein	-47.1101	360	0	0	0	0	0	0	0	0
AFLA_049870	1	EQ963483	GATA transcriptional activator AreA	-24.0304	226	0	0	0	0	0	0	0	0
AFLA_049860	1	EQ963483	hypothetical protein	-104.278	358	0	0	0	0	0	0	0	0
AFLA_049850	1	EQ963483	UDP-N-acetylmuramate--L-alanine ligase, putative	-105.048	358	0	0	0	0	0	0	0	0
AFLA_049840	1	EQ963483	rRNA processing protein Ipi1, putative	-96.1365	226	0	0	0	0	0	0	0	0
AFLA_049830	1	EQ963483	NCS1 allantoate transporter	-95.446	172	0	0	0	0	0	0	0	0
AFLA_049820	1	EQ963483	conserved hypothetical protein	128.604	301	0	0	0	0	0	0	0	0
AFLA_049810	1	EQ963483	conserved hypothetical protein	-613.833	360	613.833	3	360	0	0	0	0	0
AFLA_049800	1	EQ963483	conserved hypothetical protein	-184.628	226	613.833	3	360	0	0	0	0	0
AFLA_049790	1	EQ963483	conserved hypothetical protein	123.432	54	613.833	3	360	0	0	0	0	0
AFLA_049780	1	EQ963483	xenobiotic compound monooxygenase, DszA family	-164.621	226	0	0	0	0	0	0	0	0
AFLA_049770	1	EQ963483	hypothetical protein	-181.233	226	0	0	0	0	0	0	0	0
AFLA_049760	1	EQ963483	C2H2 finger domain protein, putative	-294.244	154	0	0	0	0	0	0	0	0
AFLA_049750	1	EQ963483	flavin-binding monooxygenase-like protein	-150.497	131	0	0	0	0	0	0	0	0
AFLA_049740	1	EQ963483	MFS lactose permease, putative	260.083	56	0	0	0	0	0	0	0	1
AFLA_049730	1	EQ963483	conserved hypothetical protein	-146.196	178	0	0	0	0	0	0	0	0
AFLA_049720	1	EQ963483	C6 transcription factor, putative	-58.5164	174	0	0	0	0	0	1	0	0
AFLA_049710	1	EQ963483	MFS transporter, putative	-94.639	202	0	0	0	0	0	0	0	1
AFLA_049700	1	EQ963483	salicylate hydroxylase, putative	-92.3381	202	0	0	0	0	0	0	0	0
AFLA_049690	1	EQ963483	conserved hypothetical protein	-171.163	178	0	0	0	0	0	0	0	0
AFLA_049680	1	EQ963483	conserved hypothetical protein	131.987	127	0	0	0	0	0	0	0	0
AFLA_049670	1	EQ963483	short-chain dehydrogenase, putative	-169.315	178	0	0	0	0	0	0	0	0
AFLA_049660	1	EQ963483	conserved hypothetical protein	-201.766	172	0	0	0	0	0	0	0	0
AFLA_049650	1	EQ963483	conserved hypothetical protein	-175.158	172	0	0	0	0	0	0	0	0
AFLA_049640	1	EQ963483	conserved hypothetical protein	97.5157	127	0	0	0	0	0	0	0	0
AFLA_049630	1	EQ963483	conserved hypothetical protein	152.612	7	0	0	0	0	0	0	0	0
AFLA_049620	1	EQ963483	conserved hypothetical protein	219.261	12	0	0	0	0	0	0	0	0
AFLA_049610	1	EQ963483	conserved hypothetical protein	-189.888	220	0	0	0	0	0	0	0	0
AFLA_049600	1	EQ963483	conserved hypothetical protein	499.935	12	0	0	0	0	0	0	0	0
AFLA_049590	1	EQ963483	hypothetical protein	820.441	7	0	0	0	0	0	0	0	0
AFLA_049580	1	EQ963483	NAD binding Rossmann fold oxidoreductase, putative	2281.31	12	2281.31	3	12	0	0	0	0	0
AFLA_049570	1	EQ963483	allantoate permease, putative	-291.528	178	2281.31	3	12	0	0	0	0	0
AFLA_049560	1	EQ963483	hypothetical protein	-466.32	220	2281.31	3	12	0	0	0	0	0
AFLA_049550	1	EQ963483	conserved hypothetical protein	-767.471	220	0	0	0	0	0	0	0	0
AFLA_049540	1	EQ963483	conserved hypothetical protein	-1370.85	220	1370.85	3	220	0	0	0	0	0
AFLA_049530	1	EQ963483	carboxylesterase, putative	-521.023	178	1370.85	3	220	0	0	0	0	0
AFLA_049520	1	EQ963483	conserved hypothetical protein	-67.503	372	1370.85	3	220	0	0	0	0	0
AFLA_049510	1	EQ963483	amine oxidase, putative	-5.67202	204	0	0	0	0	0	0	0	0
AFLA_049500	1	EQ963483	hypothetical protein	-416.245	372	0	0	0	0	0	0	0	0
AFLA_049490	1	EQ963483	conserved hypothetical protein	-614.27	372	0	0	0	0	0	0	0	0
AFLA_049480	1	EQ963483	amino acid transporter, putative	-857.744	372	0	0	0	0	0	0	0	0
AFLA_049470	1	EQ963483	conserved hypothetical protein	-1617.01	372	1617.01	3	372	0	0	0	0	0
AFLA_049460	1	EQ963483	hypothetical protein	-188.274	344	1617.01	3	372	0	0	0	0	0
AFLA_049450	1	EQ963483	conserved hypothetical protein	-56.1767	146	1617.01	3	372	0	0	0	0	0
AFLA_049440	1	EQ963483	choline transport protein, putative	-148.908	206	0	0	0	0	0	0	0	0
AFLA_049430	1	EQ963483	conserved hypothetical protein	-153.879	206	0	0	0	0	0	0	0	0
AFLA_049420	1	EQ963483	beta-glucosidase, putative	-55.391	257	0	0	0	0	0	0	0	0
AFLA_049410	1	EQ963483	C6 transcription factor, putative	-126.263	206	0	0	0	0	0	1	0	0
AFLA_049400	1	EQ963483	conserved hypothetical protein	-155.647	206	0	0	0	0	0	0	0	0
AFLA_049390	1	EQ963483	malate synthase AcuE	-161.113	206	0	0	0	0	0	0	0	0
AFLA_049380	1	EQ963483	glutamine synthetase, putative	-112.188	225	0	0	0	0	0	0	0	0
AFLA_049370	1	EQ963483	short-chain dehydrogenase/reductase family protein, putative	-208.672	258	0	0	0	0	0	0	0	0
AFLA_049360	1	EQ963483	O-methyltransferase, putative	-331.413	78	331.413	3	78	0	0	0	0	0
AFLA_049350	1	EQ963483	conserved hypothetical protein	-191.005	202	331.413	3	78	0	0	0	0	0
AFLA_049340	1	EQ963483	aldo/keto reductase, putative	-93.4063	288	331.413	3	78	0	0	0	0	0
AFLA_049330	1	EQ963483	conserved hypothetical protein	-123.149	202	123.149	3	202	0	0	0	0	0
AFLA_049320	1	EQ963483	ABC multidrug transporter, putative	-90.8574	288	123.149	3	202	0	0	0	0	0
AFLA_049310	1	EQ963483	conserved hypothetical protein	102.524	373	123.149	3	202	0	0	0	0	0
AFLA_049300	1	EQ963483	mRNA-nucleus export ATPase (Elf1), putative	-50.3865	293	0	0	0	0	0	0	0	0
AFLA_049290	1	EQ963483	citrate synthase Cit1, putative	-85.5347	288	0	0	0	0	0	0	0	0
AFLA_049280	1	EQ963483	conserved hypothetical protein	-120.78	293	0	0	0	0	0	0	0	0
AFLA_049270	1	EQ963483	C6 transcription factor, putative	-187.721	293	0	0	0	0	0	1	0	0
AFLA_049260	1	EQ963483	sugar transporter, putative	-223.26	293	223.26	4	293	0	0	0	0	0
AFLA_049250	1	EQ963483	short chain oxidoreductase/dehydrogenase, putative	26.0356	212	223.26	4	293	0	0	0	0	0
AFLA_049240	1	EQ963483	hypothetical protein	-126.654	288	223.26	4	293	0	0	0	0	0
AFLA_049230	1	EQ963483	L-arabinitol 4-dehydrogenase	71.4867	134	223.26	4	293	0	0	0	0	0
AFLA_049220	1	EQ963483	conserved hypothetical protein	-41.1202	369	0	0	0	0	0	0	0	0
AFLA_049210	1	EQ963483	hypothetical protein	-167.233	370	0	0	0	0	0	0	0	0
AFLA_049200	1	EQ963483	hypothetical protein	-172.626	370	0	0	0	0	0	0	0	0
AFLA_049190	1	EQ963483	FAD/FMN-containing isoamyl alcohol oxidase MreA	30.1495	20	0	0	0	0	0	0	0	0
AFLA_049180	1	EQ963483	hypothetical protein	80.1336	221	0	0	0	0	0	0	0	0
AFLA_049170	1	EQ963483	conserved hypothetical protein	110.25	13	0	0	0	0	0	0	0	0
AFLA_049160	1	EQ963483	steroid monooxygenase, putative	-332.455	373	332.455	3	373	0	0	0	0	0
AFLA_049150	1	EQ963483	very-long-chain acyl-CoA synthetase family protein (CefD1), putative	-227.114	265	332.455	3	373	0	0	0	0	0
AFLA_049140	1	EQ963483	pantothenate transporter, putative	79.5711	179	332.455	3	373	0	0	0	0	0
AFLA_049130	1	EQ963483	conserved hypothetical protein	32.4744	314	0	0	0	0	0	0	0	0
AFLA_049120	1	EQ963483	hypothetical protein	176.261	221	0	0	0	0	0	0	0	0
AFLA_049110	1	EQ963483	sarcosine oxidase, putative	280.349	221	280.349	4	221	0	0	0	0	0
AFLA_049100	1	EQ963483	aminotransferase, putative	-62.1591	69	280.349	4	221	0	0	0	0	0
AFLA_049090	1	EQ963483	onanonoxo-7-onima-8-eninoihtemlysoneda	50.849	206	280.349	4	221	0	0	0	0	0
AFLA_049080	1	EQ963483	biotin synthase, putative	-91.1202	69	280.349	4	221	0	0	0	0	0
AFLA_049070	1	EQ963483	sodium P-type ATPase, putative	0.1332	14	0	0	0	0	0	0	0	0
AFLA_049060	1	EQ963483	conserved hypothetical protein	66.1984	206	0	0	0	0	0	0	0	0
AFLA_049050	1	EQ963483	amidohydrolase, putative	73.2079	206	0	0	0	0	0	0	0	0
AFLA_049040	1	EQ963483	low-temperature viability protein ltv1	39.7926	263	0	0	0	0	0	0	0	0
AFLA_049030	1	EQ963483	ribosome biogenesis GTPase Lsg1, putative	42.6689	206	0	0	0	0	0	0	0	0
AFLA_049020	1	EQ963483	acyl-CoA dehydrogenase family protein	37.4976	266	0	0	0	0	0	0	0	0
AFLA_049010	1	EQ963483	conserved hypothetical protein	57.3545	261	0	0	0	0	0	0	0	0
AFLA_049000	1	EQ963483	Sad1/UNC domain protein	87.6745	261	0	0	0	0	0	0	0	0
AFLA_048990	1	EQ963483	2-dehydropantoate 2-reductase family protein, putative	151.04	261	0	0	0	0	0	0	0	0
AFLA_048980	1	EQ963483	conserved hypothetical protein	299.587	261	299.587	3	261	0	0	0	0	0
AFLA_048970	1	EQ963483	conserved hypothetical protein	69.5594	140	299.587	3	261	0	0	0	0	0
AFLA_048960	1	EQ963483	efflux pump antibiotic resistance protein, putative	60.7404	135	299.587	3	261	0	0	0	0	0
AFLA_048950	1	EQ963483	cytochrome P450, putative	19.5668	148	0	0	0	0	0	0	1	0
AFLA_048940	1	EQ963483	conserved hypothetical protein	38.498	206	0	0	0	0	0	0	0	0
AFLA_048930	1	EQ963483	hypothetical protein	46.4306	206	0	0	0	0	0	0	0	0
AFLA_048920	1	EQ963483	C6 finger domain protein, putative	24.0555	178	0	0	0	0	0	1	0	0
AFLA_048910	1	EQ963483	vacuolar protein sorting protein DigA	46.8501	206	0	0	0	0	0	0	0	0
AFLA_048900	1	EQ963483	ubiquitin C-terminal hydrolase family protein	48.4095	206	0	0	0	0	0	0	0	0
AFLA_048890	1	EQ963483	50S ribosomal subunit L7, putative	23.7862	313	0	0	0	0	0	0	0	0
AFLA_048880	1	EQ963483	MAP kinase kinase kinase Ste11	61.9797	206	0	0	0	0	0	0	0	0
AFLA_048870	1	EQ963483	C2H2 transcription factor (AmdA), putative	14.5537	313	0	0	0	0	0	0	0	0
AFLA_048860	1	EQ963483	conserved hypothetical protein	30.5375	206	0	0	0	0	0	0	0	0
AFLA_048850	1	EQ963483	smg-7, putative	55.2865	206	0	0	0	0	0	0	0	0
AFLA_048840	1	EQ963483	adenosine kinase, putative	30.1047	367	0	0	0	0	0	0	0	0
AFLA_048830	1	EQ963483	conserved hypothetical protein	29.2491	367	0	0	0	0	0	0	0	0
AFLA_048820	1	EQ963483	conserved hypothetical protein	11.7276	363	0	0	0	0	0	0	0	0
AFLA_048810	1	EQ963483	60S ribosomal protein L8, putative	20.9394	80	0	0	0	0	0	0	0	0
AFLA_048800	1	EQ963483	DNA repair and transcription factor Ada, putative	-8.59699	59	0	0	0	0	0	0	0	0
AFLA_048790	1	EQ963483	BAR domain protein	37.3191	373	0	0	0	0	0	0	0	0
AFLA_048780	1	EQ963483	RSC complex subunit (Sth1), putative	-52.9004	365	0	0	0	0	0	0	0	0
AFLA_048770	1	EQ963483	conserved hypothetical protein	-18.3795	137	0	0	0	0	0	0	0	0
AFLA_048760	1	EQ963483	membrane biogenesis protein (Yop1), putative	87.54	358	87.54	3	358	0	0	0	0	0
AFLA_048750	1	EQ963483	conserved hypothetical protein	35.3848	80	87.54	3	358	0	0	0	0	0
AFLA_048740	1	EQ963483	MFS transporter, putative	-9.60606	54	87.54	3	358	0	0	0	0	1
AFLA_048730	1	EQ963483	conserved hypothetical protein	25.9709	80	0	0	0	0	0	0	0	0
AFLA_048720	1	EQ963483	5-aminolevulinic acid synthase HemA	-22.3877	128	0	0	0	0	0	0	0	0
AFLA_048710	1	EQ963483	SNF2 family helicase/ATPase (Ino80), putative	22.0691	80	0	0	0	0	0	0	0	0
AFLA_048700	1	EQ963483	hypothetical protein	-10.2077	145	0	0	0	0	0	0	0	0
AFLA_048690	1	EQ963483	alcohol dehydrogenase, putative	-38.8783	54	0	0	0	0	0	0	0	0
AFLA_048680	1	EQ963483	GABA permease, putative	-42.7173	54	0	0	0	0	0	0	0	0
AFLA_048670	1	EQ963483	sodium/hydrogen exchanger 3, putative	-40.6072	54	0	0	0	0	0	0	0	0
AFLA_048660	1	EQ963483	sucrose transporter, putative	-42.2785	67	0	0	0	0	0	0	0	0
AFLA_048650	1	EQ963483	sexual development transcription factor SteA	-33.3566	54	0	0	0	0	0	0	0	0
AFLA_048640	1	EQ963483	conserved hypothetical protein	-44.6484	58	0	0	0	0	0	0	0	0
AFLA_048630	1	EQ963483	conserved hypothetical protein	-70.4547	56	0	0	0	0	0	0	0	0
AFLA_048620	1	EQ963483	histone acetyltransferase, putative	-14.2594	119	0	0	0	0	0	0	0	0
AFLA_048610	1	EQ963483	succinyl-CoA synthetase alpha subunit, putative	-51.3393	56	0	0	0	0	0	0	0	0
AFLA_048600	1	EQ963483	florfenicol exporter, putative	-20.288	119	0	0	0	0	0	0	0	0
AFLA_048590	1	EQ963483	DNA damage and replication checkpoint protein Rfx1, putative	-85.8988	58	0	0	0	0	0	0	0	0
AFLA_048580	1	EQ963483	conserved hypothetical protein	-100.644	56	0	0	0	0	0	0	0	0
AFLA_048570	1	EQ963483	SUMO activating enzyme (AosA), putative	-119.314	56	0	0	0	0	0	0	0	0
AFLA_048560	1	EQ963483	integral membrane protein (Ytp1), putative	-65.4298	58	0	0	0	0	0	0	0	0
AFLA_048550	1	EQ963483	DNA repair protein Swi5/Sae3, putative	-107.269	56	0	0	0	0	0	0	0	0
AFLA_048540	1	EQ963483	ABC multidrug transporter Mdr1	-59.2431	57	0	0	0	0	0	0	0	0
AFLA_048530	1	EQ963483	sulfur metabolism regulator SkpA, putative	-221.121	56	0	0	0	0	0	0	0	0
AFLA_048520	1	EQ963483	alpha 1,2-mannosyltransferase Smp3, putative	48.9789	361	0	0	0	0	0	0	0	0
AFLA_048510	1	EQ963483	UV excision repair protein (RadW), putative	61.9542	361	0	0	0	0	0	0	0	0
AFLA_048500	1	EQ963483	conserved hypothetical protein	-26.35	72	0	0	0	0	0	0	0	0
AFLA_048490	1	EQ963483	translation initiation factor eIF-6, putative	-406.712	56	0	0	0	0	0	0	0	0
AFLA_048480	1	EQ963483	SET and WW domain protein	-591.532	56	591.532	5	56	0	0	0	0	0
AFLA_048470	1	EQ963483	conserved hypothetical protein	-203.393	57	591.532	5	56	0	0	0	0	0
AFLA_048460	1	EQ963483	calcium/calmodulin dependent protein kinase, putative	-521.188	56	591.532	5	56	0	0	0	0	0
AFLA_048450	1	EQ963483	TRAPP complex subunit (Bet5), putative	-20.3239	73	591.532	5	56	0	0	0	0	0
AFLA_048440	1	EQ963483	conserved hypothetical protein	-17.428	60	591.532	5	56	0	0	0	0	0
AFLA_048430	1	EQ963483	hypothetical protein	-36.1208	159	0	0	0	0	0	0	0	0
AFLA_048420	1	EQ963483	serine/threonine protein kinase, putative	-36.8487	69	0	0	0	0	0	0	0	0
AFLA_048410	1	EQ963483	BAR adaptor protein RVS161, putative	-36.4354	159	0	0	0	0	0	0	0	0
AFLA_048400	1	EQ963483	peptidyl-tRNA hydrolase, putative	-6.12604	146	0	0	0	0	0	0	0	0
AFLA_048390	1	EQ963483	conserved hypothetical protein	-21.2705	58	0	0	0	0	0	0	0	0
AFLA_048380	1	EQ963483	conserved hypothetical protein	-19.8412	57	0	0	0	0	0	0	0	0
AFLA_048370	1	EQ963483	glycyl-tRNA synthetase	-22.0883	59	0	0	0	0	0	0	0	0
AFLA_048360	1	EQ963483	RNA processing factor 1	-28.7971	82	0	0	0	0	0	0	0	0
AFLA_048350	1	EQ963483	protein kinase (Chm1), putative	-30.2946	57	0	0	0	0	0	0	0	0
AFLA_048340	1	EQ963483	mitochondrial NADH kinase POS5, putative	-42.5131	59	0	0	0	0	0	0	0	0
AFLA_048330	1	EQ963483	acyltransferase, putative	-66.3747	59	0	0	0	0	0	0	0	0
AFLA_048320	1	EQ963483	RNA polymerase II transcription elongation factor (Ctr9), putative	-70.1773	148	70.1773	3	148	0	0	0	0	0
AFLA_048310	1	EQ963483	conserved hypothetical protein	-30.5556	57	70.1773	3	148	0	0	0	0	0
AFLA_048300	1	EQ963483	CorA family metal ion transporter, putative	-28.2379	57	70.1773	3	148	0	0	0	0	0
AFLA_048290	1	EQ963483	homoserine kinase	-17.2649	56	0	0	0	0	0	0	0	0
AFLA_048280	1	EQ963483	hypothetical protein	-31.4232	82	0	0	0	0	0	0	0	0
AFLA_048270	1	EQ963483	ubiquitin ligase subunit HrtA, putative	-34.1718	82	0	0	0	0	0	0	0	0
AFLA_048260	1	EQ963483	conserved hypothetical protein	-31.6998	57	0	0	0	0	0	0	0	0
AFLA_048250	1	EQ963483	1,3-beta-glucan biosynthesis protein, putative	-28.6436	57	0	0	0	0	0	0	0	0
AFLA_048240	1	EQ963483	NTP binding protein, putative	-24.1969	120	0	0	0	0	0	0	0	0
AFLA_048230	1	EQ963483	Golgi GDP-mannose transporter	-28.6739	120	0	0	0	0	0	0	0	0
AFLA_048220	1	EQ963483	hypothetical protein	-30.469	73	0	0	0	0	0	0	0	0
AFLA_048210	1	EQ963483	negative regulation of gluconeogenesis, putative	-18.6073	256	0	0	0	0	0	0	0	0
AFLA_048200	1	EQ963483	pseudouridylate synthase family protein	-22.9729	120	0	0	0	0	0	0	0	0
AFLA_048190	1	EQ963483	conserved hypothetical protein	-17.6817	57	0	0	0	0	0	0	0	0
AFLA_048180	1	EQ963483	chorismate mutase/prephenate dehydratase	13.9251	368	0	0	0	0	0	0	0	0
AFLA_048170	1	EQ963483	peptide chain release factor eRF/aRF, subunit 1	-22.9727	57	0	0	0	0	0	0	0	0
AFLA_048160	1	EQ963483	transporter, putative	-34.401	82	0	0	0	0	0	0	0	0
AFLA_048150	1	EQ963483	conserved hypothetical protein	-19.8861	127	0	0	0	0	0	0	0	0
AFLA_048140	1	EQ963483	60S ribosomal protein L23	-62.8256	82	0	0	0	0	0	0	0	0
AFLA_048130	1	EQ963483	mitochondrial intermembrane space translocase subunit Tim10, putative	-88.7228	82	0	0	0	0	0	0	0	0
AFLA_048120	1	EQ963483	cell cycle control protein Cwf14/Bud31, putative	-93.4415	82	93.4415	5	82	0	0	0	0	0
AFLA_048110	1	EQ963483	forkhead transcription factor (Sep1), putative	11.0514	364	93.4415	5	82	0	0	0	0	0
AFLA_048100	1	EQ963483	aspartokinase	-41.7965	82	93.4415	5	82	0	0	0	0	0
AFLA_048090	1	EQ963483	conserved hypothetical protein	-44.3082	126	93.4415	5	82	0	0	0	0	0
AFLA_048080	1	EQ963483	conserved hypothetical protein	17.7234	367	93.4415	5	82	0	0	0	0	0
AFLA_048070	1	EQ963483	non-canonical purine NTP pyrophosphatase, rdgB/HAM1 family	-25.6855	58	0	0	0	0	0	0	0	0
AFLA_048060	1	EQ963483	class V myosin (Myo4), putative	-35.1663	57	0	0	0	0	0	0	0	0
AFLA_048050	1	EQ963483	nucleosome assembly protein Nap1, putative	-44.1009	57	0	0	0	0	0	0	0	0
AFLA_048040	1	EQ963483	P-type ATPase, putative	-49.1438	57	0	0	0	0	0	0	0	0
AFLA_048030	1	EQ963483	CDK9, putative	-37.7157	126	0	0	0	0	0	0	0	0
AFLA_048020	1	EQ963483	D-3-phosphoglycerate dehydrogenase	-41.1225	57	0	0	0	0	0	0	0	0
AFLA_048010	1	EQ963483	seryl-tRNA synthetase	-43.2899	126	0	0	0	0	0	0	0	0
AFLA_048000	1	EQ963483	Rheb small monomeric GTPase RhbA	-47.3578	57	0	0	0	0	0	0	0	0
AFLA_047890	1	EQ963483	cytosine deaminase-uracil phosphoribosyltransferase fusion protein	-44.8431	126	0	0	0	0	0	0	0	0
AFLA_047880	1	EQ963483	transcription elongation factor, putative	39.3137	362	0	0	0	0	0	0	0	0
AFLA_047870	1	EQ963483	40S ribosomal protein S3Ae	59.2129	362	59.2129	7	362	0	0	0	0	0
AFLA_088870	1	EQ963472	porphobilinogen synthase, putative	91.0512	362	59.2129	7	362	0	0	0	0	0
AFLA_088860	1	EQ963472	acetyltransferase, putative	138.173	362	59.2129	7	362	0	0	0	0	0
AFLA_088850	1	EQ963472	exportin KapK	220.688	362	59.2129	7	362	0	0	0	0	0
AFLA_088840	1	EQ963472	ppp1r11-prov protein, putative	442.851	362	59.2129	7	362	0	0	0	0	0
AFLA_088830	1	EQ963472	shugoshin, putative	-118.448	126	59.2129	7	362	0	0	0	0	0
AFLA_088820	1	EQ963472	cytochrome P450 phenylacetate hydroxylase, putative	-114.469	126	59.2129	7	362	0	0	0	1	0
AFLA_088810	1	EQ963472	glycerol-3-phosphate dehydrogenase, mitochondrial	-64.1068	127	0	0	0	0	0	0	0	0
AFLA_088800	1	EQ963472	conserved hypothetical protein	-64.2224	57	0	0	0	0	0	0	0	0
AFLA_088790	1	EQ963472	DUF814 domain protein, putative	-44.0513	57	0	0	0	0	0	0	0	0
AFLA_088780	1	EQ963472	Golgi matrix protein, putative	-34.835	56	0	0	0	0	0	0	0	0
AFLA_088770	1	EQ963472	guanylate kinase	-9.58693	137	0	0	0	0	0	0	0	0
AFLA_088760	1	EQ963472	septin	-39.9439	56	0	0	0	0	0	0	0	0
AFLA_088750	1	EQ963472	meiotic recombination protein Ski8/Rec14, putative	-46.7663	57	0	0	0	0	0	0	0	0
AFLA_088740	1	EQ963472	conserved hypothetical protein	-51.8475	56	0	0	0	0	0	0	0	0
AFLA_088730	1	EQ963472	conserved hypothetical protein	-56.6302	56	0	0	0	0	0	0	0	0
AFLA_088720	1	EQ963472	iron/copper transporter Atx1, putative	-69.355	57	0	0	0	0	0	0	0	0
AFLA_088710	1	EQ963472	conserved hypothetical protein	-71.1129	57	71.1129	5	57	0	0	0	0	0
AFLA_088700	1	EQ963472	CHY and RING finger domain protein, putative	-59.5408	57	71.1129	5	57	0	0	0	0	0
AFLA_088690	1	EQ963472	IQ calmodulin-binding motif domain protein	5.24228	92	71.1129	5	57	0	0	0	0	0
AFLA_088680	1	EQ963472	WD repeat protein	-33.8109	56	71.1129	5	57	0	0	0	0	0
AFLA_088670	1	EQ963472	pheromone processing carboxypeptidase Kex1	-10.7591	229	71.1129	5	57	0	0	0	0	0
AFLA_088660	1	EQ963472	DUF431 domain protein	-6.80037	148	0	0	0	0	0	0	0	0
AFLA_088650	1	EQ963472	cAMP-regulated phosphoprotein family protein Igo1, putative	30.6353	222	0	0	0	0	0	0	0	0
AFLA_088640	1	EQ963472	hypothetical protein	49.7738	222	0	0	0	0	0	0	0	0
AFLA_088630	1	EQ963472	conserved hypothetical protein	-46.2415	56	0	0	0	0	0	0	0	0
AFLA_088620	1	EQ963472	UPF0160 domain protein MYG1, putative	35.9483	171	0	0	0	0	0	0	0	0
AFLA_088610	1	EQ963472	lactonohydrolase, putative	-13.5635	148	0	0	0	0	0	0	0	0
AFLA_088600	1	EQ963472	conserved hypothetical protein	-14.5266	127	0	0	0	0	0	0	0	0
AFLA_088590	1	EQ963472	nuclear pore complex protein (SonA), putative	-14.4198	126	0	0	0	0	0	0	0	0
AFLA_088580	1	EQ963472	conserved hypothetical protein	22.0046	80	0	0	0	0	0	0	0	0
AFLA_088570	1	EQ963472	conserved hypothetical protein	-53.2678	134	53.2678	5	134	0	0	0	0	0
AFLA_088560	1	EQ963472	intermediate filament protein (Mdm1), putative	-26.7111	138	53.2678	5	134	0	0	0	0	0
AFLA_088550	1	EQ963472	phospholipid methyltransferase	-48.8161	134	53.2678	5	134	0	0	0	0	0
AFLA_088540	1	EQ963472	conserved hypothetical protein	-32.1725	324	53.2678	5	134	0	0	0	0	0
AFLA_088530	1	EQ963472	transmembrane glycoprotein, putative	-7.93614	93	53.2678	5	134	0	0	0	0	0
AFLA_088520	1	EQ963472	CUE domain protein, putative	-20.1627	324	0	0	0	0	0	0	0	0
AFLA_088510	1	EQ963472	hypothetical protein	-23.8002	324	0	0	0	0	0	0	0	0
AFLA_088500	1	EQ963472	ATP dependent RNA helicase, putative	-26.8496	56	0	0	0	0	0	0	0	0
AFLA_088490	1	EQ963472	DUF1000 domain protein	-12.2178	75	0	0	0	0	0	0	0	0
AFLA_088480	1	EQ963472	SNF7 family protein	-26.2432	324	0	0	0	0	0	0	0	0
AFLA_088470	1	EQ963472	AAA family ATPase/60S ribosome export protein Rix7, putative	-31.2004	324	0	0	0	0	0	0	0	0
AFLA_088460	1	EQ963472	ribosome biogenesis protein Erb1, putative	-26.6316	324	0	0	0	0	0	0	0	0
AFLA_088450	1	EQ963472	C6 finger domain protein, putative	-21.9778	324	0	0	0	0	0	1	0	0
AFLA_088440	1	EQ963472	RNA polymerase-associated protein LEO1, putative	17.6214	178	0	0	0	0	0	0	0	0
AFLA_088430	1	EQ963472	protein kinase activator (Mob2), putative	-19.839	56	0	0	0	0	0	0	0	0
AFLA_088420	1	EQ963472	conserved hypothetical protein	-21.7481	56	0	0	0	0	0	0	0	0
AFLA_088410	1	EQ963472	rhomboid family protein, putative	-17.9494	56	0	0	0	0	0	0	0	0
AFLA_088400	1	EQ963472	conserved hypothetical protein	23.1381	178	0	0	0	0	0	0	0	0
AFLA_088390	1	EQ963472	transcription factor btf3, putative	27.1324	225	0	0	0	0	0	0	0	0
AFLA_088380	1	EQ963472	Patatin-like serine hydrolase, putative	14.5259	219	0	0	0	0	0	0	0	0
AFLA_088370	1	EQ963472	60S ribosomal protein L9, putative	-31.9652	93	0	0	0	0	0	0	0	0
AFLA_088360	1	EQ963472	Glutaredoxin domain protein	-38.6183	324	0	0	0	0	0	0	0	0
AFLA_088350	1	EQ963472	hydrolase, alpha/beta fold family protein	34.7602	225	0	0	0	0	0	0	0	0
AFLA_088340	1	EQ963472	conserved hypothetical protein	-51.2345	324	0	0	0	0	0	0	0	0
AFLA_088330	1	EQ963472	MFS transporter, putative	27.9712	178	0	0	0	0	0	0	0	1
AFLA_088320	1	EQ963472	protein phosphatase 2C, putative	22.6503	178	0	0	0	0	0	0	0	0
AFLA_088310	1	EQ963472	hypothetical protein	53.4806	225	0	0	0	0	0	0	0	0
AFLA_088300	1	EQ963472	cholinephosphate cytidylyltransferase	54.3877	225	0	0	0	0	0	0	0	0
AFLA_088290	1	EQ963472	conserved hypothetical protein	-52.5512	179	0	0	0	0	0	0	0	0
AFLA_088280	1	EQ963472	DUF6 domain protein, putative	-39.8584	324	0	0	0	0	0	0	0	0
AFLA_088270	1	EQ963472	nucleolus protein required for cell viability, putative	37.3008	224	0	0	0	0	0	0	0	0
AFLA_088260	1	EQ963472	eukaryotic translation initiation factor 3 subunit EifCf, putative	57.8183	225	0	0	0	0	0	0	0	0
AFLA_088250	1	EQ963472	transcription initiation factor TFIID subunit 13, putative	68.8191	219	0	0	0	0	0	0	0	0
AFLA_088240	1	EQ963472	S-adenosylmethionine-dependent methyltransferase, putative	76.4377	224	0	0	0	0	0	0	0	0
AFLA_088230	1	EQ963472	pentatricopeptide repeat protein	78.5251	224	0	0	0	0	0	0	0	0
AFLA_088220	1	EQ963472	cell cycle control protein cwf18, putative	180.038	225	0	0	0	0	0	0	0	0
AFLA_088210	1	EQ963472	hypothetical protein	181.318	225	0	0	0	0	0	0	0	0
AFLA_088200	1	EQ963472	R3H domain protein, putative	69.4666	81	0	0	0	0	0	0	0	0
AFLA_088190	1	EQ963472	IZH family channel protein (Izh3), putative	165.861	225	0	0	0	0	0	0	0	0
AFLA_088180	1	EQ963472	fms interacting protein, putative	72.225	81	0	0	0	0	0	0	0	0
AFLA_088170	1	EQ963472	GPI transamidase component PIG-S, putative	123.707	225	0	0	0	0	0	0	0	0
AFLA_088160	1	EQ963472	conserved hypothetical protein	138.127	221	0	0	0	0	0	0	0	0
AFLA_088150	1	EQ963472	Fe superoxide dismutase, putative	119.431	221	0	0	0	0	0	0	0	0
AFLA_088140	1	EQ963472	sreptomyces cyclase/dehydrase family protein	144.13	221	0	0	0	0	0	0	0	0
AFLA_088130	1	EQ963472	C6 transcription factor, putative	93.5233	81	0	0	0	0	0	1	0	0
AFLA_088120	1	EQ963472	hypothetical protein	78.1604	91	0	0	0	0	0	0	0	0
AFLA_088110	1	EQ963472	conserved hypothetical protein	285.778	81	0	0	0	0	0	0	0	0
AFLA_088100	1	EQ963472	purine-cytosine permease, putative	-25.7443	148	0	0	0	0	0	0	0	0
AFLA_088090	1	EQ963472	long-chain fatty acid transporter, putative	41.7805	227	0	0	0	0	0	0	0	0
AFLA_088080	1	EQ963472	aspartate aminotransferase, putative	46.1067	227	0	0	0	0	0	0	0	0
AFLA_088070	1	EQ963472	ABC transporter (Adp1), putative	65.3026	81	0	0	0	0	0	0	0	0
AFLA_088060	1	EQ963472	endosomal cargo receptor (Erv14), putative	103.323	81	0	0	0	0	0	0	0	0
AFLA_088050	1	EQ963472	mRNA splicing factor (Prp17), putative	197.968	81	0	0	0	0	0	0	0	0
AFLA_088040	1	EQ963472	EF hand domain protein	60.7456	220	0	0	0	0	0	0	0	0
AFLA_088030	1	EQ963472	MFS multidrug transporter, putative	45.8489	251	0	0	0	0	0	0	0	1
AFLA_088020	1	EQ963472	methionine aminopeptidase, putative	-72.9503	11	0	0	0	0	0	0	0	0
AFLA_088010	1	EQ963472	kynurenine 3-monooxygenase, putative	162.125	227	0	0	0	0	0	0	0	0
AFLA_088000	1	EQ963472	NAD dependent epimerase/dehydratase, putative	206.622	220	0	0	0	0	0	0	0	0
AFLA_087990	1	EQ963472	40S ribosomal protein S8	336.168	220	0	0	0	0	0	0	0	0
AFLA_087980	1	EQ963472	RNA recognition motif-containing protein, putative	612.72	227	612.72	3	227	0	0	0	0	0
AFLA_087970	1	EQ963472	mucin-7 precursor, putative	-65.0501	92	612.72	3	227	0	0	0	0	0
AFLA_087960	1	EQ963472	hypothetical protein	-18.2322	146	612.72	3	227	0	0	0	0	0
AFLA_087950	1	EQ963472	isocitrate dehydrogenase LysB	64.2213	30	0	0	0	0	0	0	0	0
AFLA_087940	1	EQ963472	conserved hypothetical protein	30.8449	46	0	0	0	0	0	0	0	0
AFLA_087930	1	EQ963472	conserved hypothetical protein	-14.9046	110	0	0	0	0	0	0	0	0
AFLA_087920	1	EQ963472	F-box domain protein	-75.5161	116	0	0	0	0	0	0	0	0
AFLA_087910	1	EQ963472	conserved hypothetical protein	73.1028	30	0	0	0	0	0	0	0	0
AFLA_087900	1	EQ963472	pyruvate kinase	-175.054	116	0	0	0	0	0	0	0	0
AFLA_087890	1	EQ963472	conserved hypothetical protein	-378.403	116	378.403	3	116	0	0	0	0	0
AFLA_087880	1	EQ963472	integral membrane protein	20.4471	85	378.403	3	116	0	0	0	0	0
AFLA_087870	1	EQ963472	endoglucanase, putative	4.45388	219	378.403	3	116	0	0	0	0	0
AFLA_087860	1	EQ963472	cellulose-binding GDSL lipase/acylhydrolase, putative	51.0728	81	0	0	0	0	0	0	0	0
AFLA_087850	1	EQ963472	conserved hypothetical protein	91.4514	81	91.4514	3	81	0	0	0	0	0
AFLA_087840	1	EQ963472	WD repeat protein	-52.9833	158	91.4514	3	81	0	0	0	0	0
AFLA_087830	1	EQ963472	DNA excision repair protein Rad2	-30.5277	146	91.4514	3	81	0	0	0	0	0
AFLA_087820	1	EQ963472	cell wall integrity signaling protein Lsp1/Pil1, putative	-26.7729	126	0	0	0	0	0	0	0	0
AFLA_087810	1	EQ963472	bZIP transcription factor, putative	-18.2476	35	0	0	0	0	0	0	0	0
AFLA_087800	1	EQ963472	hypothetical protein	-36.0411	47	0	0	0	0	0	0	0	0
AFLA_087790	1	EQ963472	C6 transcription factor, putative	41.9412	206	0	0	0	0	0	1	0	0
AFLA_087780	1	EQ963472	conserved hypothetical protein	30.3584	198	0	0	0	0	0	0	0	0
AFLA_087770	1	EQ963472	chromosome segregation protein Spc105, putative	155.404	206	0	0	0	0	0	0	0	0
AFLA_087760	1	EQ963472	40S ribosomal protein S11	83.3467	222	0	0	0	0	0	0	0	0
AFLA_087750	1	EQ963472	conserved hypothetical protein	214.88	206	0	0	0	0	0	0	0	0
AFLA_087740	1	EQ963472	ENTH domain protein	333.27	206	0	0	0	0	0	0	0	0
AFLA_087730	1	EQ963472	conserved hypothetical protein	44.3853	302	0	0	0	0	0	0	0	0
AFLA_087720	1	EQ963472	conserved hypothetical protein	-46.0945	275	0	0	0	0	0	0	0	0
AFLA_087710	1	EQ963472	GPR/FUN34 family protein	119.929	302	0	0	0	0	0	0	0	0
AFLA_087700	1	EQ963472	hypothetical protein	-6.4187	56	0	0	0	0	0	0	0	0
AFLA_087690	1	EQ963472	hypothetical protein	-74.8833	126	0	0	0	0	0	0	0	0
AFLA_087680	1	EQ963472	NADH:flavin oxidoreductase/NADH oxidase family protein	-53.7635	127	0	0	0	0	0	0	0	0
AFLA_087670	1	EQ963472	triadin, putative	-125.25	126	0	0	0	0	0	0	0	0
AFLA_087660	1	EQ963472	conserved hypothetical protein	-139.923	127	0	0	0	0	0	0	0	0
AFLA_087650	1	EQ963472	chromatin assembly factor 1 subunit B, putative	-139.608	126	0	0	0	0	0	0	0	0
AFLA_087640	1	EQ963472	alpha,alpha-trehalose phosphate synthase subunit, putative	-181.387	126	0	0	0	0	0	0	0	0
AFLA_087630	1	EQ963472	alpha,alpha-trehalose-phosphate synthase subunit, putative	-118.682	126	0	0	0	0	0	0	0	0
AFLA_087620	1	EQ963472	NmrA family transcriptional regulator, putative	109.207	31	0	0	0	0	0	0	0	0
AFLA_087610	1	EQ963472	peptidase (PNG1), putative	237.803	44	0	0	0	0	0	0	0	0
AFLA_087600	1	EQ963472	conserved hypothetical protein	587.729	44	587.729	3	44	0	0	0	0	0
AFLA_087590	1	EQ963472	alpha-1,3-glucanase/mutanase, putative	210.186	313	587.729	3	44	0	0	0	0	0
AFLA_087580	1	EQ963472	DUF52 domain protein	-242.694	148	587.729	3	44	0	0	0	0	0
AFLA_087570	1	EQ963472	conserved hypothetical protein	-173.174	159	0	0	0	0	0	0	0	0
AFLA_087560	1	EQ963472	conserved hypothetical protein	-145.386	93	0	0	0	0	0	0	0	0
AFLA_087550	1	EQ963472	serine/threonine protein phosphatase, putative	-175.684	159	0	0	0	0	0	0	0	0
AFLA_087540	1	EQ963472	hypothetical protein	-201.599	159	201.599	6	159	0	0	0	0	0
AFLA_087530	1	EQ963472	small nucleolar ribonucleoprotein complex subunit, putative	-150.235	90	201.599	6	159	0	0	0	0	0
AFLA_087520	1	EQ963472	G1/S-specific cyclin Cln1, putative	91.2357	302	201.599	6	159	0	0	0	0	0
AFLA_087510	1	EQ963472	conserved hypothetical protein	-48.9172	324	201.599	6	159	0	0	0	0	0
AFLA_087500	1	EQ963472	ATP-dependent DNA helicase, putative	45.0541	206	201.599	6	159	0	0	0	0	0
AFLA_087490	1	EQ963472	heme/steroid binding protein, putative	24.8204	378	201.599	6	159	0	0	0	0	0
AFLA_087480	1	EQ963472	FKBP-type peptidyl-prolyl isomerase, putative	-25.6631	167	0	0	0	0	0	0	0	0
AFLA_087470	1	EQ963472	plasma membrane low affinity zinc ion transporter, putative	-25.4256	146	0	0	0	0	0	0	0	0
AFLA_087460	1	EQ963472	hypothetical protein	-65.2111	367	0	0	0	0	0	0	0	0
AFLA_087450	1	EQ963472	conserved hypothetical protein	-28.0557	257	0	0	0	0	0	0	0	0
AFLA_087440	1	EQ963472	mitochondrial import receptor subunit (Tom37), putative	-42.5511	224	0	0	0	0	0	0	0	0
AFLA_087430	1	EQ963472	allergen Asp F4	-125.048	367	0	0	0	0	0	0	0	0
AFLA_087420	1	EQ963472	carboxyphosphonoenolpyruvate phosphonomutase, putative	-193.953	367	193.953	4	367	0	0	0	0	0
AFLA_087410	1	EQ963472	histone deacetylase HosA	60.3553	30	193.953	4	367	0	0	0	0	0
AFLA_087400	1	EQ963472	oxysterol binding protein (Osh7), putative	23.9488	209	193.953	4	367	0	0	0	0	0
AFLA_087390	1	EQ963472	conserved hypothetical protein	-26.6739	219	193.953	4	367	0	0	0	0	0
AFLA_087380	1	EQ963472	isochorismatase family hydrolase, putative	-31.879	56	0	0	0	0	0	0	0	0
AFLA_087370	1	EQ963472	transcription/RNA-processing factor Ssu72	-27.2263	189	0	0	0	0	0	0	0	0
AFLA_087360	1	EQ963472	ThiF domain protein, putative	33.7156	208	0	0	0	0	0	0	0	0
AFLA_087350	1	EQ963472	C2H2 transcription factor (Ace1), putative	-59.3658	189	0	0	0	0	0	0	0	0
AFLA_087340	1	EQ963472	conserved hypothetical protein	-49.8946	365	0	0	0	0	0	0	0	0
AFLA_087330	1	EQ963472	peroxisome biosynthesis protein (PAS8/Peroxin-6), putative	38.0105	223	0	0	0	0	0	0	0	0
AFLA_087320	1	EQ963472	GABA permease GabA	-99.9238	189	0	0	0	0	0	0	0	0
AFLA_087310	1	EQ963472	conserved hypothetical protein	92.7752	222	0	0	0	0	0	0	0	0
AFLA_087300	1	EQ963472	conserved hypothetical protein	126.064	222	0	0	0	0	0	0	0	0
AFLA_087290	1	EQ963472	hypothetical protein	193.359	222	193.359	3	222	0	0	0	0	0
AFLA_087280	1	EQ963472	alpha-ketoglutarate-dependent taurine dioxygenase	74.7749	366	193.359	3	222	0	0	0	0	0
AFLA_087270	1	EQ963472	transporter, putative	93.0463	366	193.359	3	222	0	0	0	0	0
AFLA_087260	1	EQ963472	conserved hypothetical protein	115.785	366	0	0	0	0	0	0	0	0
AFLA_087250	1	EQ963472	phosphoinositide-specific phospholipase C, putative	-58.9768	363	0	0	0	0	0	0	0	0
AFLA_087240	1	EQ963472	glutathione S-transferase, putative	-56.1416	377	0	0	0	0	0	0	0	0
AFLA_087230	1	EQ963472	conserved hypothetical protein	-17.4823	43	0	0	0	0	0	0	0	0
AFLA_087220	1	EQ963472	UDP-glucose 4-epimerase, putative	235.486	366	235.486	5	366	0	0	0	0	0
AFLA_087210	1	EQ963472	cell surface spherulin 4 family protein	-206.317	377	235.486	5	366	0	0	0	0	0
AFLA_087190	1	EQ963472	hypothetical protein	158.453	366	235.486	5	366	0	0	0	0	0
AFLA_087180	1	EQ963472	endo alpha-1,4 polygalactosaminidase, putative	-50.4617	87	235.486	5	366	0	0	0	0	0
AFLA_087170	1	EQ963472	extracellular serine-rich protein, putative	-55.7886	274	235.486	5	366	0	0	0	0	0
AFLA_087160	1	EQ963472	dipeptidyl aminopeptidase Ste13	-68.4878	85	0	0	0	0	0	0	0	0
AFLA_087150	1	EQ963472	conserved hypothetical protein	-89.0205	87	0	0	0	0	0	0	0	0
AFLA_087140	1	EQ963472	PX domain protein	-108.856	87	0	0	0	0	0	0	0	0
AFLA_087130	1	EQ963472	conserved hypothetical protein	-101.699	274	0	0	0	0	0	0	0	0
AFLA_087120	1	EQ963472	tRNA (guanine) methyltransferase Trm5	-122.646	87	0	0	0	0	0	0	0	0
AFLA_087110	1	EQ963472	polymerase (RNA) II (DNA directed) polypeptide D	-181.978	87	0	0	0	0	0	0	0	0
AFLA_087100	1	EQ963472	benzoate 4-monooxygenase cytochrome P450, putative	-250.621	85	0	0	0	0	0	0	1	0
AFLA_087090	1	EQ963472	C6 transcription factor (OTam), putative	-319.64	87	319.64	3	87	0	0	1	0	0
AFLA_087080	1	EQ963472	conserved hypothetical protein	163.535	259	319.64	3	87	0	0	0	0	0
AFLA_087070	1	EQ963472	DUF1338 domain protein	29.7684	302	319.64	3	87	0	0	0	0	0
AFLA_087060	1	EQ963472	GMC oxidoreductase, putative	-41.7378	278	0	0	0	0	0	0	0	0
AFLA_087050	1	EQ963472	aconitate hydratase, putative	-39.6209	278	0	0	0	0	0	0	0	0
AFLA_087040	1	EQ963472	60S ribosomal protein Nsa2, putative	28.4119	200	0	0	0	0	0	0	0	0
AFLA_087030	1	EQ963472	conserved hypothetical protein	41.4943	133	0	0	0	0	0	0	0	0
AFLA_087020	1	EQ963472	hypothetical protein	31.388	139	0	0	0	0	0	0	0	0
AFLA_087010	1	EQ963472	conserved hypothetical protein	36.2778	234	0	0	0	0	0	0	0	0
AFLA_087000	1	EQ963472	checkpoint protein kinase, putative	29.3815	200	0	0	0	0	0	0	0	0
AFLA_086990	1	EQ963472	cell wall protein, putative	-19.5005	57	0	0	0	0	0	0	0	0
AFLA_086980	1	EQ963472	PWI domain mRNA processing protein, putative	-32.6999	126	0	0	0	0	0	0	0	0
AFLA_086970	1	EQ963472	conserved hypothetical protein	12.234	203	0	0	0	0	0	0	0	0
AFLA_086960	1	EQ963472	fumarylacetoacetate hydrolase family protein	-47.2658	324	0	0	0	0	0	0	0	0
AFLA_086950	1	EQ963472	conserved hypothetical protein	-76.7536	324	0	0	0	0	0	0	0	0
AFLA_086940	1	EQ963472	eukaryotic translation initiation factor 4, putative	-59.7046	54	0	0	0	0	0	0	0	0
AFLA_086930	1	EQ963472	F-box and JmjC domain protein, putative	-98.932	57	0	0	0	0	0	0	0	0
AFLA_086920	1	EQ963472	Ctr copper transporter family protein	-70.5788	126	0	0	0	0	0	0	0	0
AFLA_086910	1	EQ963472	spac6f6.09 protein, putative	-55.311	126	0	0	0	0	0	0	0	0
AFLA_086900	1	EQ963472	alpha-mannosidase	2.34452	267	0	0	0	0	0	0	0	0
AFLA_086890	1	EQ963472	conserved hypothetical protein	-115.446	57	0	0	0	0	0	0	0	0
AFLA_086880	1	EQ963472	conserved hypothetical protein	-105.769	54	0	0	0	0	0	0	0	0
AFLA_086870	1	EQ963472	MRS7 family protein	-106.484	57	0	0	0	0	0	0	0	0
AFLA_086860	1	EQ963472	NUDIX domain protein	-57.2313	56	0	0	0	0	0	0	0	0
AFLA_086850	1	EQ963472	conserved hypothetical protein	-44.0298	69	0	0	0	0	0	0	0	0
AFLA_086840	1	EQ963472	cohesin complex subunit (Psm1), putative	-79.1427	54	0	0	0	0	0	0	0	0
AFLA_086830	1	EQ963472	conserved hypothetical protein	-82.9862	54	0	0	0	0	0	0	0	0
AFLA_086820	1	EQ963472	pyruvate dehydrogenase complex component Pdx1, putative	-84.6066	57	0	0	0	0	0	0	0	0
AFLA_086810	1	EQ963472	aldo/keto reductase, putative	-86.7727	57	0	0	0	0	0	0	0	0
AFLA_086800	1	EQ963472	epoxide hydrolase, putative	-80.484	56	0	0	0	0	0	0	0	0
AFLA_086790	1	EQ963472	cell cycle regulatory protein (Srw1), putative	-91.2617	57	0	0	0	0	0	0	0	0
AFLA_086780	1	EQ963472	aspartyl aminopeptidase	-111.291	57	0	0	0	0	0	0	0	0
AFLA_086770	1	EQ963472	conserved hypothetical protein	-133.4	69	0	0	0	0	0	0	0	0
AFLA_086760	1	EQ963472	ATP-dependent Clp protease, proteolytic subunit ClpP	-102.706	56	0	0	0	0	0	0	0	0
AFLA_086750	1	EQ963472	conserved hypothetical protein	-91.8467	69	0	0	0	0	0	0	0	0
AFLA_086740	1	EQ963472	4-nitrophenylphosphatase	-87.8883	57	0	0	0	0	0	0	0	0
AFLA_086730	1	EQ963472	DNA replication factor C subunit Rfc2, putative	-12.0531	249	0	0	0	0	0	0	0	0
AFLA_086720	1	EQ963472	conserved hypothetical protein	-88.9232	69	0	0	0	0	0	0	0	0
AFLA_086710	1	EQ963472	inorganic diphosphatase, putative	-125.32	69	0	0	0	0	0	0	0	0
AFLA_086700	1	EQ963472	tRNA dihydrouridine synthase (Smm1), putative	-198.205	69	0	0	0	0	0	0	0	0
AFLA_086690	1	EQ963472	SNF2 family helicase/ATPase, putative	-159.62	57	0	0	0	0	0	0	0	0
AFLA_086680	1	EQ963472	conserved hypothetical protein	-224.645	57	0	0	0	0	0	0	0	0
AFLA_086670	1	EQ963472	cystathionine beta-synthase (beta-thionase), putative	-311.642	57	311.642	4	57	0	0	0	0	0
AFLA_086660	1	EQ963472	mitochondrial phosphate carrier protein, putative	-305.88	57	311.642	4	57	0	0	0	0	0
AFLA_086650	1	EQ963472	conserved hypothetical protein	-100.063	82	311.642	4	57	0	0	0	0	0
AFLA_086640	1	EQ963472	conserved hypothetical protein	13.9981	219	311.642	4	57	0	0	0	0	0
AFLA_086630	1	EQ963472	60S ribosomal protein L35Ae	-86.9719	82	0	0	0	0	0	0	0	0
AFLA_086620	1	EQ963472	glucose-6-phosphate 1-dehydrogenase	-118.896	90	0	0	0	0	0	0	0	0
AFLA_086610	1	EQ963472	conserved hypothetical protein	-222.576	90	0	0	0	0	0	0	0	0
AFLA_086600	1	EQ963472	morphogenesis protein (Msb1), putative	-302.599	82	302.599	3	82	0	0	0	0	0
AFLA_086590	1	EQ963472	transcription factor smp1, putative	-66.7712	89	302.599	3	82	0	0	0	0	0
AFLA_086580	1	EQ963472	MFS drug transporter, putative	-34.4386	74	302.599	3	82	0	0	0	0	1
AFLA_086570	1	EQ963472	calcium binding modulator protein (Alg2), putative	-31.2226	245	0	0	0	0	0	0	0	0
AFLA_086560	1	EQ963472	short-chain dehydrogenase/reductase family protein, putative	43.4294	54	0	0	0	0	0	0	0	0
AFLA_086550	1	EQ963472	conserved hypothetical protein	32.1802	132	0	0	0	0	0	0	0	0
AFLA_086540	1	EQ963472	glycine-rich RNA-binding protein, putative	196.039	54	0	0	0	0	0	0	0	0
AFLA_086530	1	EQ963472	ariadne RING finger, putative	306.349	63	0	0	0	0	0	0	0	0
AFLA_086520	1	EQ963472	conserved hypothetical protein	351.58	54	351.58	3	54	0	0	0	0	0
AFLA_086510	1	EQ963472	conserved hypothetical protein	110.253	222	351.58	3	54	0	0	0	0	0
AFLA_086500	1	EQ963472	conserved hypothetical protein	155.828	223	351.58	3	54	0	0	0	0	0
AFLA_086490	1	EQ963472	conserved hypothetical protein	79.942	216	0	0	0	0	0	0	0	0
AFLA_086480	1	EQ963472	translational initiation factor 2 beta	514.67	223	0	0	0	0	0	0	0	0
AFLA_086470	1	EQ963472	DUF124 domain protein	1181.73	223	1181.73	3	223	0	0	0	0	0
AFLA_086460	1	EQ963472	m-phase phosphoprotein, putative	-15.4479	264	1181.73	3	223	0	0	0	0	0
AFLA_086450	1	EQ963472	conserved hypothetical protein	-14.378	303	1181.73	3	223	0	0	0	0	0
AFLA_086440	1	EQ963472	SH3 domain protein	-73.557	179	0	0	0	0	0	0	0	0
AFLA_086430	1	EQ963472	coactivator bridging factor 1 (Mbf1), putative	-76.024	179	0	0	0	0	0	0	0	0
AFLA_086420	1	EQ963472	eukaryotic translation initiation factor 3 subunit 2i, putative	35.0554	274	0	0	0	0	0	0	0	0
AFLA_086410	1	EQ963472	C1 tetrahydrofolate synthase, putative	-97.204	179	0	0	0	0	0	0	0	0
AFLA_086400	1	EQ963472	isocitrate dehydrogenase Idp1, putative	-134.235	179	0	0	0	0	0	0	0	0
AFLA_086390	1	EQ963472	conserved hypothetical protein	-109.116	93	0	0	0	0	0	0	0	0
AFLA_086380	1	EQ963472	conserved hypothetical protein	-155.748	291	0	0	0	0	0	0	0	0
AFLA_086370	1	EQ963472	conserved hypothetical protein	-197.941	291	197.941	4	291	0	0	0	0	0
AFLA_086360	1	EQ963472	extracellular exo-polygalacturonase, putative	-179.827	138	197.941	4	291	0	0	0	0	0
AFLA_086350	1	EQ963472	conserved hypothetical protein	-190.229	169	197.941	4	291	0	0	0	0	0
AFLA_086340	1	EQ963472	conserved hypothetical protein	-61.9834	25	197.941	4	291	0	0	0	0	0
AFLA_086330	1	EQ963472	conserved hypothetical protein	36.0319	274	0	0	0	0	0	0	0	0
AFLA_086320	1	EQ963472	endosome-associated ubiquitin isopeptidase (AmsH), putative	52.7451	275	0	0	0	0	0	0	0	0
AFLA_086310	1	EQ963472	oxidative stress response protein Oxr1, putative	48.2884	363	0	0	0	0	0	0	0	0
AFLA_086300	1	EQ963472	vacuolar import and degRadation protein, putative	38.3831	363	0	0	0	0	0	0	0	0
AFLA_086290	1	EQ963472	tRNA m(1)G methyltransferase domain containing protein	69.2677	274	0	0	0	0	0	0	0	0
AFLA_086280	1	EQ963472	NADH-ubiquinone oxidoreductase subunit GRIM-19, putative	79.8433	274	0	0	0	0	0	0	0	0
AFLA_086270	1	EQ963472	nuclear import and export protein Msn5, putative	79.0234	275	0	0	0	0	0	0	0	0
AFLA_086260	1	EQ963472	glycosyl hydrolase, putative	138.452	274	0	0	0	0	0	0	0	0
AFLA_086250	1	EQ963472	translation repressor/antiviral protein Ski3, putative	-79.9863	302	0	0	0	0	0	0	0	0
AFLA_086240	1	EQ963472	RecQ-mediated genome instability protein, putative	172.236	274	0	0	0	0	0	0	0	0
AFLA_086230	1	EQ963472	conserved hypothetical protein	155.062	275	0	0	0	0	0	0	0	0
AFLA_086220	1	EQ963472	conserved hypothetical protein	287.308	274	0	0	0	0	0	0	0	0
AFLA_086210	1	EQ963472	epoxide hydrolase, putative	353.264	274	0	0	0	0	0	0	0	0
AFLA_086200	1	EQ963472	betaine-aldehyde dehydrogenase, putative	335.418	274	0	0	0	0	0	0	0	0
AFLA_086190	1	EQ963472	5-carboxymethyl-2-hydroxymuconate semialdehyde dehydrogenase, putative	86.0414	90	0	0	0	0	0	0	0	0
AFLA_086180	1	EQ963472	conserved hypothetical protein	39.4217	176	0	0	0	0	0	0	0	0
AFLA_086170	1	EQ963472	proteasome regulatory particle subunit (RpnL), putative	256.113	274	0	0	0	0	0	0	0	0
AFLA_086160	1	EQ963472	tripeptidyl peptidase SED3	446.027	274	446.027	4	274	0	0	0	0	0
AFLA_086150	1	EQ963472	conserved hypothetical protein	122.531	156	446.027	4	274	0	0	0	0	0
AFLA_086140	1	EQ963472	conserved hypothetical protein	-56.8526	288	446.027	4	274	0	0	0	0	0
AFLA_086130	1	EQ963472	NUDIX domain, putative	24.9273	154	446.027	4	274	0	0	0	0	0
AFLA_086120	1	EQ963472	hypothetical protein	334.808	303	334.808	3	303	0	0	0	0	0
AFLA_086110	1	EQ963472	C6 transcription factor, putative	45.5441	154	334.808	3	303	0	0	1	0	0
AFLA_086100	1	EQ963472	hypothetical protein	62.8249	154	334.808	3	303	0	0	0	0	0
AFLA_086090	1	EQ963472	conserved hypothetical protein	60.5706	64	0	0	0	0	0	0	0	0
AFLA_086080	1	EQ963472	restculine oxidase precursor, putative	76.1796	158	76.1796	3	158	0	0	0	0	0
AFLA_086070	1	EQ963472	chitin synthase, putative	64.7805	127	76.1796	3	158	0	0	0	0	0
AFLA_086060	1	EQ963472	conserved hypothetical protein	60.3927	40	76.1796	3	158	0	0	0	0	0
AFLA_086050	1	EQ963472	conserved hypothetical protein	36.891	13	0	0	0	0	0	0	0	0
AFLA_086040	1	EQ963472	hypothetical protein	123.163	42	0	0	0	0	0	0	0	0
AFLA_086030	1	EQ963472	conserved hypothetical protein	197.386	42	197.386	4	42	0	0	0	0	0
AFLA_086020	1	EQ963472	caffeine resistance protein, putative	140.126	12	197.386	4	42	0	0	0	0	0
AFLA_086010	1	EQ963472	conserved hypothetical protein	87.3741	376	197.386	4	42	0	0	0	0	0
AFLA_086000	1	EQ963472	exonuclease, putative	85.6132	376	197.386	4	42	0	0	0	0	0
AFLA_085990	1	EQ963472	translation machinery-associated protein, putative	22.3704	301	0	0	0	0	0	0	0	0
AFLA_085980	1	EQ963472	regulatory protein SUAPRGA1	-41.3676	261	0	0	0	0	0	0	0	0
AFLA_085970	1	EQ963472	DNA primase subunit Pri1, putative	-39.7244	361	0	0	0	0	0	0	0	0
AFLA_085960	1	EQ963472	cell surface protein, putative	-61.5339	314	0	0	0	0	0	0	0	0
AFLA_085950	1	EQ963472	alcohol dehydrogenase, putative	3.81326	209	0	0	0	0	0	0	0	0
AFLA_085940	1	EQ963472	AP-1 adaptor complex subunit beta, putative	-37.6011	321	0	0	0	0	0	0	0	0
AFLA_085930	1	EQ963472	transcriptional regulator, putative	-45.5117	15	0	0	0	0	0	0	0	0
AFLA_085920	1	EQ963472	FAD dependent sulfhydryl oxidase Erv1, putative	-20.5317	13	0	0	0	0	0	0	0	0
AFLA_085910	1	EQ963472	Coatomer subunit alpha, putative	-48.4656	113	0	0	0	0	0	0	0	0
AFLA_085900	1	EQ963472	hypothetical protein	-84.1395	113	0	0	0	0	0	0	0	0
AFLA_085890	1	EQ963472	conserved hypothetical protein	-163.781	113	163.781	3	113	0	0	0	0	0
AFLA_085880	1	EQ963472	BTB domain transcription factor, putative	108.752	169	163.781	3	113	0	0	0	0	0
AFLA_085870	1	EQ963472	conserved hypothetical protein	122.181	119	163.781	3	113	0	0	0	0	0
AFLA_085860	1	EQ963472	hypothetical protein	111.938	179	0	0	0	0	0	0	0	0
AFLA_085850	1	EQ963472	conserved hypothetical protein	-75.1444	279	0	0	0	0	0	0	0	0
AFLA_085840	1	EQ963472	tubulin-specific chaperone c, putative	-146.031	279	146.031	3	279	0	0	0	0	0
AFLA_085830	1	EQ963472	conserved hypothetical protein	-75.7378	366	146.031	3	279	0	0	0	0	0
AFLA_085820	1	EQ963472	conserved hypothetical protein	84.6323	264	146.031	3	279	0	0	0	0	0
AFLA_085810	1	EQ963472	OPT peptide transporter Mtd1, putative	-115.729	63	0	0	0	0	0	0	0	0
AFLA_085800	1	EQ963472	conserved hypothetical protein	-118.559	310	0	0	0	0	0	0	0	0
AFLA_085790	1	EQ963472	conserved hypothetical protein	-146.025	83	0	0	0	0	0	0	0	0
AFLA_085780	1	EQ963472	RING finger domain protein	-261.588	83	261.588	5	83	0	0	0	0	0
AFLA_085770	1	EQ963472	DNA replication regulator sld2	200.804	363	261.588	5	83	0	0	0	0	0
AFLA_085760	1	EQ963472	conserved hypothetical protein	-147.514	106	261.588	5	83	0	0	0	0	0
AFLA_085750	1	EQ963472	C6 transcription factor, putative	60.1683	363	261.588	5	83	0	0	1	0	0
AFLA_085740	1	EQ963472	C6 transcription factor, putative	-22.7592	312	261.588	5	83	0	0	1	0	0
AFLA_085730	1	EQ963472	conserved hypothetical protein	-103.729	366	0	0	0	0	0	0	0	0
AFLA_085720	1	EQ963472	conserved hypothetical protein	-134.748	366	0	0	0	0	0	0	0	0
AFLA_085710	1	EQ963472	arsenite efflux transporter (ArsB), putative	59.6201	86	0	0	0	0	0	0	0	0
AFLA_085700	1	EQ963472	arsenate reductase (Arc2), putative	-112.53	366	0	0	0	0	0	0	0	0
AFLA_085690	1	EQ963472	conserved hypothetical protein	85.9538	109	0	0	0	0	0	0	0	0
AFLA_085680	1	EQ963472	hypothetical protein	110.776	226	0	0	0	0	0	0	0	0
AFLA_085670	1	EQ963472	efflux pump antibiotic resistance protein, putative	-325.238	366	325.238	4	366	0	0	0	0	0
AFLA_085660	1	EQ963472	arsenic resistance protein ArsH	164.282	226	325.238	4	366	0	0	0	0	0
AFLA_085650	1	EQ963472	conserved hypothetical protein	177.689	226	325.238	4	366	0	0	0	0	0
AFLA_085640	1	EQ963472	hypothetical protein	21.4645	122	325.238	4	366	0	0	0	0	0
AFLA_085630	1	EQ963472	hypothetical protein	96.2606	107	0	0	0	0	0	0	0	0
AFLA_085620	1	EQ963472	conserved hypothetical protein	115.598	107	0	0	0	0	0	0	0	0
AFLA_085610	1	EQ963472	sulfur metabolite repression control protein, putative	102.562	358	0	0	0	0	0	0	0	0
AFLA_085600	1	EQ963472	conserved hypothetical protein	151.597	107	0	0	0	0	0	0	0	0
AFLA_085590	1	EQ963472	endo-arabinanase, putative	194.854	125	0	0	0	0	0	0	0	0
AFLA_085580	1	EQ963472	oxidoreductase, short chain dehydrogenase/reductase family protein, putative	501.647	107	0	0	0	0	0	0	0	0
AFLA_085570	1	EQ963472	lipase/esterase, putative	579.827	35	0	0	0	0	0	0	0	0
AFLA_085560	1	EQ963472	conserved hypothetical protein	1202.34	35	1202.34	3	35	0	0	0	0	0
AFLA_085550	1	EQ963472	hypothetical protein	265.282	109	1202.34	3	35	0	0	0	0	0
AFLA_085540	1	EQ963472	conserved hypothetical protein	120.725	346	1202.34	3	35	0	0	0	0	0
AFLA_085530	1	EQ963472	monooxygenase, putative	-116.176	42	0	0	0	0	0	0	0	0
AFLA_085520	1	EQ963472	glycan biosynthesis protein (PigL), putative	-147.548	41	147.548	5	41	0	0	0	0	0
AFLA_085510	1	EQ963472	trytophan synthase alpha subunit, putative	-109.023	30	147.548	5	41	0	0	0	0	0
AFLA_085500	1	EQ963472	extracellular proline-glycine rich protein	-124.591	358	147.548	5	41	0	0	0	0	0
AFLA_085490	1	EQ963472	P450 family fatty acid hydroxylase, putative	31.1697	341	147.548	5	41	0	0	0	1	0
AFLA_085480	1	EQ963472	cell wall glucanase, putative	3.13524	312	147.548	5	41	0	0	0	0	0
AFLA_085470	1	EQ963472	hypothetical protein	11.8919	101	0	0	0	0	0	0	0	0
AFLA_085460	1	EQ963472	conserved hypothetical protein	20.4444	341	20.4444	3	341	0	0	0	0	0
AFLA_085450	1	EQ963472	eukaryotic translation initiation factor 3 subunit EifCk, putative	13.8927	377	20.4444	3	341	0	0	0	0	0
AFLA_085440	1	EQ963472	PDCD2_C domain protein, putative	17.1419	375	20.4444	3	341	0	0	0	0	0
AFLA_085430	1	EQ963472	prenylcysteine lyase, putative	-11.4038	369	0	0	0	0	0	0	0	0
AFLA_085420	1	EQ963472	serine hydroxymethyltransferase, putative	16.1969	41	0	0	0	0	0	0	0	0
AFLA_085410	1	EQ963472	conserved hypothetical protein	17.0217	41	0	0	0	0	0	0	0	0
AFLA_085400	1	EQ963472	phosphoglycerate mutase, 2,3-bisphosphoglycerate-independent	-34.9087	57	0	0	0	0	0	0	0	0
AFLA_085390	1	EQ963472	prefoldin subunit 6, putative	-36.1131	304	0	0	0	0	0	0	0	0
AFLA_085380	1	EQ963472	vacuolar sorting ATPase Vps4, putative	-14.4855	365	0	0	0	0	0	0	0	0
AFLA_085370	1	EQ963472	spindle-pole body protein (Pcp1), putative	24.6732	41	0	0	0	0	0	0	0	0
AFLA_085360	1	EQ963472	regulatory factor Sgt1, putative	-46.0248	305	0	0	0	0	0	0	0	0
AFLA_085350	1	EQ963472	AMMECR1 family protein	17.7206	313	0	0	0	0	0	0	0	0
AFLA_085340	1	EQ963472	hypothetical protein	26.4333	246	0	0	0	0	0	0	0	0
AFLA_085330	1	EQ963472	hypothetical protein	-45.6952	305	0	0	0	0	0	0	0	0
AFLA_085320	1	EQ963472	calcium/calmodulin dependent protein kinase, putative	-53.1542	305	0	0	0	0	0	0	0	0
AFLA_085310	1	EQ963472	DNA polymerase epsilon, catalytic subunit A/POL2, putative	38.8074	246	0	0	0	0	0	0	0	0
AFLA_085300	1	EQ963472	conserved hypothetical protein	-55.3629	152	0	0	0	0	0	0	0	0
AFLA_085290	1	EQ963472	conserved hypothetical protein	61.6536	246	0	0	0	0	0	0	0	0
AFLA_085280	1	EQ963472	pre-rRNA processing nucleolar protein Sik1, putative	-87.6462	152	0	0	0	0	0	0	0	0
AFLA_085270	1	EQ963472	t-complex protein 1, zeta subunit, putative	-101.636	152	0	0	0	0	0	0	0	0
AFLA_085260	1	EQ963472	histone acetyltransferase (MysT1), putative	-126.91	152	0	0	0	0	0	0	0	0
AFLA_085250	1	EQ963472	RNA binding protein, putative	132.52	246	0	0	0	0	0	0	0	0
AFLA_085240	1	EQ963472	hypothetical protein	-39.153	360	0	0	0	0	0	0	0	0
AFLA_085230	1	EQ963472	conserved hypothetical protein	103.784	246	0	0	0	0	0	0	0	0
AFLA_085220	1	EQ963472	asparaginyl-tRNA synthetase Slm5, putative	34.4456	230	0	0	0	0	0	0	0	0
AFLA_085210	1	EQ963472	hypothetical protein	158.404	246	0	0	0	0	0	0	0	0
AFLA_085200	1	EQ963472	camp independent regulatory protein	200.58	246	0	0	0	0	0	0	0	0
AFLA_085190	1	EQ963472	conserved hypothetical protein	91.5299	314	0	0	0	0	0	0	0	0
AFLA_085180	1	EQ963472	hypothetical protein	320.043	246	0	0	0	0	0	0	0	0
AFLA_085170	1	EQ963472	C6 transcription factor OefC	634.356	246	634.356	3	246	0	0	1	0	0
AFLA_085160	1	EQ963472	ABC efflux transporter, putative	189.813	243	634.356	3	246	0	0	0	0	0
AFLA_085150	1	EQ963472	ATP-binding cassette transporter, putative	36.945	81	634.356	3	246	0	0	0	0	0
AFLA_085140	1	EQ963472	extracellular thaumatin domain protein, putative	132.904	92	0	0	0	0	0	0	0	0
AFLA_085130	1	EQ963472	Sec23/Sec24 family protein	214.63	92	214.63	3	92	0	0	0	0	0
AFLA_085120	1	EQ963472	amino acid permease	33.9141	81	214.63	3	92	0	0	0	0	0
AFLA_085110	1	EQ963472	cleavage and polyadenylylation specificity factor, putative	-17.1055	360	214.63	3	92	0	0	0	0	0
AFLA_085100	1	EQ963472	hypothetical protein	-13.3352	360	0	0	0	0	0	0	0	0
AFLA_085090	1	EQ963472	integral plasma membrane protein, putative	30.7648	203	0	0	0	0	0	0	0	0
AFLA_085080	1	EQ963472	fgf receptor activating protein, putative	41.239	203	41.239	3	203	0	0	0	0	0
AFLA_085070	1	EQ963472	rRNA processing protein Utp6, putative	-20.6929	239	41.239	3	203	0	0	0	0	0
AFLA_085060	1	EQ963472	peptidyl-tRNA hydrolase domain protein	-19.6391	337	41.239	3	203	0	0	0	0	0
AFLA_085050	1	EQ963472	arginine/serine-rich splicing factor, putative	-20.3216	56	0	0	0	0	0	0	0	0
AFLA_085040	1	EQ963472	conserved hypothetical protein	-41.033	361	41.033	4	361	0	0	0	0	0
AFLA_085030	1	EQ963472	protein sys1, putative	-28.539	366	41.033	4	361	0	0	0	0	0
AFLA_085020	1	EQ963472	class II aldolase/adducin domain protein	20.0743	372	41.033	4	361	0	0	0	0	0
AFLA_085010	1	EQ963472	conserved hypothetical protein	24.6787	67	41.033	4	361	0	0	0	0	0
AFLA_085000	1	EQ963472	Golgi transport complex component Cog5, putative	10.5736	372	0	0	0	0	0	0	0	0
AFLA_084990	1	EQ963472	conserved hypothetical protein	-10.2548	152	0	0	0	0	0	0	0	0
AFLA_084980	1	EQ963472	hypothetical protein	22.6039	363	0	0	0	0	0	0	0	0
AFLA_084970	1	EQ963472	C2H2 transcription factor, putative	6.53625	232	0	0	0	0	0	0	0	0
AFLA_084960	1	EQ963472	hypothetical protein	16.1246	363	0	0	0	0	0	0	0	0
AFLA_084950	1	EQ963472	conserved hypothetical protein	-22.6278	56	0	0	0	0	0	0	0	0
AFLA_084940	1	EQ963472	conserved hypothetical protein	63.9163	206	0	0	0	0	0	0	0	0
AFLA_084930	1	EQ963472	DNA mismatch repair protein Msh2, putative	16.6106	363	0	0	0	0	0	0	0	0
AFLA_084920	1	EQ963472	N-acetylglucosaminyl transferase component Gpi1	-32.3801	149	0	0	0	0	0	0	0	0
AFLA_084910	1	EQ963472	exosome complex exonuclease Rrp6, putative	51.1044	372	0	0	0	0	0	0	0	0
AFLA_084900	1	EQ963472	GTPase activating protein Sar1, putative	-68.595	143	0	0	0	0	0	0	0	0
AFLA_084890	1	EQ963472	aspartyl protease, putative	21.5311	248	0	0	0	0	0	0	0	0
AFLA_084880	1	EQ963472	mitochondrial inheritance component mdm12	13.9326	258	0	0	0	0	0	0	0	0
AFLA_084870	1	EQ963472	hypothetical protein	-22.1215	62	0	0	0	0	0	0	0	0
AFLA_084860	1	EQ963472	conserved hypothetical protein	-28.3105	62	0	0	0	0	0	0	0	0
AFLA_084850	1	EQ963472	serine/threonine protein kinase (Kin4), putative	-28.689	62	0	0	0	0	0	0	0	0
AFLA_084840	1	EQ963472	conserved hypothetical protein	-23.6916	152	0	0	0	0	0	0	0	0
AFLA_084830	1	EQ963472	hypothetical protein	29.4834	246	0	0	0	0	0	0	0	0
AFLA_084820	1	EQ963472	acyl-CoA dehydrogenase, putative	-74.1105	152	0	0	0	0	0	0	0	0
AFLA_084810	1	EQ963472	conserved hypothetical protein	-7.35153	93	0	0	0	0	0	0	0	0
AFLA_084800	1	EQ963472	hypothetical protein	-23.8456	152	0	0	0	0	0	0	0	0
AFLA_084790	1	EQ963472	GPI anchor biosynthesis protein Gwt1, putative	-50.8484	370	0	0	0	0	0	0	0	0
AFLA_084780	1	EQ963472	N-acylethanolamine amidohydrolase, putative	-145.881	369	0	0	0	0	0	0	0	0
AFLA_084770	1	EQ963472	cAMP-specific phosphodiesterase, putative	-137.254	370	0	0	0	0	0	0	0	0
AFLA_084760	1	EQ963472	endosomal SPRY domain protein, putative	-167.891	369	0	0	0	0	0	0	0	0
AFLA_084750	1	EQ963472	peptidase D, putative	-185.749	369	0	0	0	0	0	0	0	0
AFLA_084740	1	EQ963472	conserved hypothetical protein	-97.1651	256	0	0	0	0	0	0	0	0
AFLA_084730	1	EQ963472	protein translocation complex component (Npl1), putative	-160.266	369	0	0	0	0	0	0	0	0
AFLA_084720	1	EQ963472	C6 transcription factor, putative	-40.3112	222	0	0	0	0	0	1	0	0
AFLA_084710	1	EQ963472	sugar 1,4-lactone oxidase, putative	-201.915	370	0	0	0	0	0	0	0	0
AFLA_084700	1	EQ963472	gelsolin repeat protein, putative	-240.98	369	0	0	0	0	0	0	0	0
AFLA_084690	1	EQ963472	ADP-ribosylation factor family protein	24.7425	54	0	0	0	0	0	0	0	0
AFLA_084680	1	EQ963472	conserved hypothetical protein	-303.397	369	0	0	0	0	0	0	0	0
AFLA_084670	1	EQ963472	ATP-dependent RNA helicase (Drs1), putative	-39.2087	76	0	0	0	0	0	0	0	0
AFLA_084660	1	EQ963472	2-isopropylmalate synthase	-235.213	369	0	0	0	0	0	0	0	0
AFLA_084650	1	EQ963472	palmitoyltransferase with autoacylation activity Pfa4, putative	-144.248	255	0	0	0	0	0	0	0	0
AFLA_084640	1	EQ963472	conserved hypothetical protein	-155.609	255	0	0	0	0	0	0	0	0
AFLA_084630	1	EQ963472	AMP binding domain protein, putative	-251.681	370	0	0	0	0	0	0	0	0
AFLA_084620	1	EQ963472	40S ribosomal protein S5, putative	-289.452	56	0	0	0	0	0	0	0	0
AFLA_084610	1	EQ963472	SDA1 domain protein	-291.216	369	0	0	0	0	0	0	0	0
AFLA_084600	1	EQ963472	conserved hypothetical protein	-174.979	255	0	0	0	0	0	0	0	0
AFLA_084590	1	EQ963472	Hsp70 family chaperone Lhs1/Orp150, putative	-328.181	369	0	0	0	0	0	0	0	0
AFLA_084580	1	EQ963472	mtDNA inheritance protein Dml1, putative	-50.6086	322	0	0	0	0	0	0	0	0
AFLA_084570	1	EQ963472	conserved hypothetical protein	-361.736	369	0	0	0	0	0	0	0	0
AFLA_084560	1	EQ963472	pyridoxal reductase, putative	-142.969	185	0	0	0	0	0	0	0	0
AFLA_084550	1	EQ963472	hypothetical protein	-274.019	320	0	0	0	0	0	0	0	0
AFLA_084540	1	EQ963472	conserved hypothetical protein	-416.504	369	0	0	0	0	0	0	0	0
AFLA_084530	1	EQ963472	EBP domain protein, putative	-414.686	99	0	0	0	0	0	0	0	0
AFLA_084520	1	EQ963472	conserved hypothetical protein	-482.955	320	0	0	0	0	0	0	0	0
AFLA_084510	1	EQ963472	dsDNA-dependent ATPase (Rad54b), putative	-831.129	320	831.129	3	320	0	0	0	0	0
AFLA_084500	1	EQ963472	choline transport protein, putative	-123.991	306	831.129	3	320	0	0	0	0	0
AFLA_084490	1	EQ963472	conserved hypothetical protein	45.4093	363	831.129	3	320	0	0	0	0	0
AFLA_084480	1	EQ963472	short chain dehydrogenase, putative	-59.2899	369	0	0	0	0	0	0	0	0
AFLA_084470	1	EQ963472	polysaccharide deacetylase family protein	-63.7928	369	0	0	0	0	0	0	0	0
AFLA_084460	1	EQ963472	heat shock protein Hsp98/Hsp104/ClpA, putative	-74.3788	369	0	0	0	0	0	0	0	0
AFLA_084450	1	EQ963472	conserved hypothetical protein	26.2835	363	0	0	0	0	0	0	0	0
AFLA_084440	1	EQ963472	autophagy protein Atg27, putative	45.9194	359	0	0	0	0	0	0	0	0
AFLA_084430	1	EQ963472	hypothetical protein	-94.2249	370	0	0	0	0	0	0	0	0
AFLA_084420	1	EQ963472	prefoldin subunit 4, putative	-57.2698	371	0	0	0	0	0	0	0	0
AFLA_084410	1	EQ963472	C6 transcription factor, putative	-66.5762	370	0	0	0	0	0	1	0	0
AFLA_084400	1	EQ963472	conserved hypothetical protein	99.6954	363	0	0	0	0	0	0	0	0
AFLA_084390	1	EQ963472	conserved hypothetical protein	74.7181	362	0	0	0	0	0	0	0	0
AFLA_084380	1	EQ963472	Hsp70 family protein	397.234	363	397.234	3	363	0	0	0	0	0
AFLA_084370	1	EQ963472	conserved hypothetical protein	-102.957	92	397.234	3	363	0	0	0	0	0
AFLA_084360	1	EQ963472	acyl-CoA thioesterase II	36.8484	343	397.234	3	363	0	0	0	0	0
AFLA_084350	1	EQ963472	conserved hypothetical protein	52.4837	343	0	0	0	0	0	0	0	0
AFLA_084340	1	EQ963472	alpha-amylase, putative	-37.0431	274	0	0	0	0	0	0	0	0
AFLA_084330	1	EQ963472	mitochondrial phosphate carrier protein (Mir1), putative	-29.7049	308	0	0	0	0	0	0	0	0
AFLA_084320	1	EQ963472	hypothetical protein	-14.2368	334	0	0	0	0	0	0	0	0
AFLA_084310	1	EQ963472	hypothetical protein	65.9283	372	0	0	0	0	0	0	0	0
AFLA_084290	1	EQ963472	conserved hypothetical protein	73.3793	372	0	0	0	0	0	0	0	0
AFLA_084280	1	EQ963472	cytochrome P450 monooxygenase, putative	126.023	80	0	0	0	0	0	0	1	0
AFLA_084270	1	EQ963472	GPI anchor transamidase, putative	117.239	362	0	0	0	0	0	0	0	0
AFLA_084260	1	EQ963472	DNA replication initiation factor Cdc45	-132.735	126	0	0	0	0	0	0	0	0
AFLA_084250	1	EQ963472	conserved hypothetical protein	127.007	80	0	0	0	0	0	0	0	0
AFLA_084240	1	EQ963472	poly(A) polymerase Pap	-160.393	126	0	0	0	0	0	0	0	0
AFLA_084230	1	EQ963472	homoserine acetyltransferase family protein	-172.601	126	172.601	3	126	0	0	0	0	0
AFLA_084220	1	EQ963472	conserved hypothetical protein	-42.8695	23	172.601	3	126	0	0	0	0	0
AFLA_084210	1	EQ963472	hypothetical protein	-115.141	308	172.601	3	126	OTHER	30	0	0	0
AFLA_084200	1	EQ963472	C6 transcription factor, putative	-73.0873	269	0	0	0	OTHER	30	1	0	0
AFLA_084190	1	EQ963472	conserved hypothetical protein	3.51525	257	0	0	0	OTHER	30	0	0	0
AFLA_084180	1	EQ963472	hypothetical protein	-132.205	308	0	0	0	OTHER	30	0	0	0
AFLA_084170	1	EQ963472	L-ascorbate oxidase, putative	-89.0108	296	0	0	0	OTHER	30	0	0	0
AFLA_084160	1	EQ963472	DUF1014 domain protein	-153.573	308	0	0	0	OTHER	30	0	0	0
AFLA_084150	1	EQ963472	peroxisome biosynthesis protein (Peroxine-7), putative	-171.626	308	0	0	0	OTHER	30	0	0	0
AFLA_084140	1	EQ963472	dihydrolipoamide acetyltransferase component of pyruvate dehydrogenase, putative	-50.556	353	0	0	0	OTHER	30	0	0	0
AFLA_084130	1	EQ963472	alpha-ketoglutarate dehydrogenase complex subunit Kgd1, putative	-164.207	238	0	0	0	OTHER	30	0	0	0
AFLA_084120	1	EQ963472	2-oxoglutarate dehydrogenase, putative	-179.11	238	179.11	12	238	OTHER	30	0	0	0
AFLA_084110	1	EQ963472	2-oxoglutarate dehydrogenase, putative	-142.355	308	179.11	12	238	OTHER	30	0	0	0
AFLA_084100	1	EQ963472	2-oxoglutarate dehydrogenase, putative	90.058	343	179.11	12	238	OTHER	30	0	0	0
AFLA_084090	1	EQ963472	C6 transcription factor, putative	154.817	343	179.11	12	238	OTHER	30	1	0	0
AFLA_084080	1	EQ963472	dimethylallyl tryptophan synthase, putative	-62.9549	254	179.11	12	238	OTHER	30	0	0	0
AFLA_084070	1	EQ963472	CUE domain protein, putative	-87.2362	254	179.11	12	238	0	0	0	0	0
AFLA_084060	1	EQ963472	hypothetical protein	-14.3473	74	179.11	12	238	0	0	0	0	0
AFLA_084050	1	EQ963472	ubiquitin-conjugating enzyme, putative	-70.548	254	179.11	12	238	0	0	0	0	0
AFLA_084040	1	EQ963472	conserved hypothetical protein	43.8048	363	179.11	12	238	0	0	0	0	0
AFLA_084030	1	EQ963472	conserved hypothetical protein	82.8897	363	179.11	12	238	0	0	0	0	0
AFLA_084020	1	EQ963472	homeobox and C2H2 transcription factor, putative	14.2115	375	179.11	12	238	0	0	0	0	0
AFLA_084010	1	EQ963472	lactam utilization protein LamB	-9.61989	88	179.11	12	238	0	0	0	0	0
AFLA_084000	1	EQ963472	urea amidolyase, putative	-30.6863	261	0	0	0	0	0	0	0	0
AFLA_083990	1	EQ963472	JmjC domain protein, putative	-32.6831	261	0	0	0	0	0	0	0	0
AFLA_083980	1	EQ963472	GTP-binding protein Obg	-35.8244	135	0	0	0	0	0	0	0	0
AFLA_083970	1	EQ963472	hypothetical protein	-21.455	176	0	0	0	0	0	0	0	0
AFLA_083960	1	EQ963472	hypothetical protein	-99.2196	135	0	0	0	0	0	0	0	0
AFLA_083950	1	EQ963472	MFS multidrug transporter, putative	-123.118	135	0	0	0	0	0	0	0	1
AFLA_083940	1	EQ963472	C6 transcription factor (UaY), putative	-125.779	135	0	0	0	0	0	1	0	0
AFLA_083930	1	EQ963472	DnaJ domain protein	-19.9819	92	0	0	0	0	0	0	0	0
AFLA_083920	1	EQ963472	adenylosuccinate synthetase AdB	-91.7297	135	0	0	0	0	0	0	0	0
AFLA_083910	1	EQ963472	pirin domain protein, putative	-88.378	147	0	0	0	0	0	0	0	0
AFLA_083900	1	EQ963472	DEAD box RNA helicase HelA, putative	-122.522	147	0	0	0	0	0	0	0	0
AFLA_083890	1	EQ963472	oxidoreductase, zinc-binding dehydrogenase family, putative	-79.0387	145	0	0	0	0	0	0	0	0
AFLA_083880	1	EQ963472	succinate dehydrogenase subunit CybS, putative	-168.327	147	0	0	0	0	0	0	0	0
AFLA_083870	1	EQ963472	acetylserotonin methytransferase-like protein (ASMTL), putative	-260.574	142	0	0	0	0	0	0	0	0
AFLA_083860	1	EQ963472	conserved hypothetical protein	-126.691	189	0	0	0	0	0	0	0	0
AFLA_083850	1	EQ963472	conserved hypothetical protein	-187.441	189	0	0	0	0	0	0	0	0
AFLA_083840	1	EQ963472	conserved hypothetical protein	-214.453	189	0	0	0	0	0	0	0	0
AFLA_083830	1	EQ963472	hypothetical protein	-249.405	189	0	0	0	0	0	0	0	0
AFLA_083820	1	EQ963472	C6 finger domain protein, putative	442.564	291	442.564	3	291	0	0	1	0	0
AFLA_083810	1	EQ963472	DEAD/DEAH box helicase, putative	-323.571	189	442.564	3	291	0	0	0	0	0
AFLA_083800	1	EQ963472	conserved hypothetical protein	42.0269	213	442.564	3	291	0	0	0	0	0
AFLA_083790	1	EQ963472	conserved hypothetical protein	-36.7587	82	0	0	0	0	0	0	0	0
AFLA_083780	1	EQ963472	hypothetical protein	-75.4991	83	0	0	0	0	0	0	0	0
AFLA_083770	1	EQ963472	conserved hypothetical protein	-38.9226	106	0	0	0	0	0	0	0	0
AFLA_083760	1	EQ963472	anaphase-promoting complex component Cut20/Apc4, putative	-95.8496	92	0	0	0	0	0	0	0	0
AFLA_083750	1	EQ963472	importin beta-1 subunit	83.3338	189	0	0	0	0	0	0	0	0
AFLA_083740	1	EQ963472	40S ribosomal protein S22	167.996	189	167.996	3	189	0	0	0	0	0
AFLA_083730	1	EQ963472	epoxide hydrolase, putative	58.4249	196	167.996	3	189	0	0	0	0	0
AFLA_083720	1	EQ963472	conserved hypothetical protein	21.3684	235	167.996	3	189	0	0	0	0	0
AFLA_083710	1	EQ963472	hypothetical protein	20.2501	200	0	0	0	0	0	0	0	0
AFLA_083700	1	EQ963472	conserved hypothetical protein	57.6554	231	0	0	0	0	0	0	0	0
AFLA_083690	1	EQ963472	phosphoglycerate mutase family protein	-43.8073	85	0	0	0	0	0	0	0	0
AFLA_083680	1	EQ963472	conserved fungal protein	-65.8294	85	0	0	0	0	0	0	0	0
AFLA_083670	1	EQ963472	hypothetical protein	-105.146	10	0	0	0	0	0	0	0	0
AFLA_083660	1	EQ963472	phosphatidylserine decarboxylase, putative	-79.1037	151	0	0	0	0	0	0	0	0
AFLA_083650	1	EQ963472	anaphase promoting complex subunit 10 (APC10), putative	-122.407	10	0	0	0	0	0	0	0	0
AFLA_083640	1	EQ963472	3-isopropylmalate dehydrogenase Leu2A	-117.992	10	0	0	0	0	0	0	0	0
AFLA_083630	1	EQ963472	CDP-diacylglycerol-inositol 3-phosphatidyltransferase PIS	-167.149	151	0	0	0	0	0	0	0	0
AFLA_083620	1	EQ963472	protein phosphatase 2C, putative	-112.937	10	0	0	0	0	0	0	0	0
AFLA_083610	1	EQ963472	glutathione S-transferase, putative	-82.5735	168	0	0	0	0	0	0	0	0
AFLA_083600	1	EQ963472	RNA splicing factor (Pad-1), putative	-99.0778	313	0	0	0	0	0	0	0	0
AFLA_083590	1	EQ963472	fatty acid hydroxylase, putative	-57.8383	120	0	0	0	0	0	0	0	0
AFLA_083580	1	EQ963472	conserved hypothetical protein	-89.5055	97	0	0	0	0	0	0	0	0
AFLA_083570	1	EQ963472	conserved hypothetical protein	-105.66	307	0	0	0	0	0	0	0	0
AFLA_083560	1	EQ963472	C6 transcription factor, putative	-106.024	168	0	0	0	0	0	1	0	0
AFLA_083550	1	EQ963472	Coatomer subunit delta, putative	-107.957	102	0	0	0	0	0	0	0	0
AFLA_083540	1	EQ963472	conserved glutamic acid-rich protein	-138.744	313	0	0	0	0	0	0	0	0
AFLA_083530	1	EQ963472	DUF803 domain membrane protein	-196.387	313	0	0	0	0	0	0	0	0
AFLA_083520	1	EQ963472	SacI domain protein	338.176	276	338.176	4	276	0	0	0	0	0
AFLA_083510	1	EQ963472	homeobox and C2H2 transcription factor, putative	176.559	91	338.176	4	276	0	0	0	0	0
AFLA_083500	1	EQ963472	diaminopropionate ammonia-lyase, putative	-134.319	85	338.176	4	276	0	0	0	0	0
AFLA_083490	1	EQ963472	sterol delta 5,6-desaturase, putative	-75.6728	120	338.176	4	276	0	0	0	0	0
AFLA_083480	1	EQ963472	importin beta-2 subunit, putative	-91.3161	171	0	0	0	0	0	0	0	0
AFLA_083470	1	EQ963472	Ribosomal protein S28e	-250.009	225	0	0	0	0	0	0	0	0
AFLA_083460	1	EQ963472	C6 transcription factor RosA-like, putative	-283.552	220	0	0	0	0	0	1	0	0
AFLA_083450	1	EQ963472	integral membrane protein, putative	-309.654	102	0	0	0	0	0	0	0	0
AFLA_083440	1	EQ963472	26S proteasome-associated ubiquitin C-terminal hydrolase, putative	-259.769	85	0	0	0	0	0	0	0	0
AFLA_083430	1	EQ963472	choline kinase, putative	420.387	229	420.387	3	229	0	0	0	0	0
AFLA_083420	1	EQ963472	non-hemolytic phospholipase C precursor, putative	-186.926	78	420.387	3	229	0	0	0	0	0
AFLA_083410	1	EQ963472	laccase, putative	-29.4033	62	420.387	3	229	0	0	0	0	0
AFLA_083400	1	EQ963472	Auxin Efflux Carrier superfamily	-48.8179	152	0	0	0	0	0	0	0	0
AFLA_083390	1	EQ963472	conserved hypothetical protein	-47.2582	86	0	0	0	0	0	0	0	0
AFLA_083380	1	EQ963472	MAP kinase kinase (Pbs2), putative	-63.7697	86	0	0	0	0	0	0	0	0
AFLA_083370	1	EQ963472	glutathione oxidoreductase Glr1, putative	-91.8726	152	0	0	0	0	0	0	0	0
AFLA_083360	1	EQ963472	extracellular cell wall glucanase Crf1/allergen Asp F9	71.6709	370	0	0	0	0	0	0	0	0
AFLA_083350	1	EQ963472	conserved hypothetical protein	-56.204	179	0	0	0	0	0	0	0	0
AFLA_083340	1	EQ963472	threonyl-tRNA synthetase	75.5038	247	0	0	0	0	0	0	0	0
AFLA_083330	1	EQ963472	C6 transcription factor, putative	165.617	243	0	0	0	OTHER	29	1	0	0
AFLA_083320	1	EQ963472	MFS quinate transporter, putative	-132.475	226	0	0	0	OTHER	29	0	0	1
AFLA_083310	1	EQ963472	TIM barrel metal-dependent hydrolase, putative	188.61	243	0	0	0	OTHER	29	0	0	0
AFLA_083300	1	EQ963472	alpha-glucosidase, putative	-115.377	174	0	0	0	OTHER	29	0	0	0
AFLA_083290	1	EQ963472	translation initiation factor eif-2B, putative	277.487	366	277.487	3	366	OTHER	29	0	0	0
AFLA_083280	1	EQ963472	hypothetical protein	-142.476	49	277.487	3	366	OTHER	29	0	0	0
AFLA_083270	1	EQ963472	GABA permease, putative	135.124	290	277.487	3	366	OTHER	29	0	0	0
AFLA_083260	1	EQ963472	hypothetical protein	78.7225	372	78.7225	3	372	OTHER	29	0	0	0
AFLA_083250	1	EQ963472	dimethylallyl tryptophan synthase, putative	-47.6425	93	78.7225	3	372	OTHER	29	0	0	0
AFLA_083240	1	EQ963472	xylitol dehydrogenase LadA/XdhB	-52.1208	179	78.7225	3	372	OTHER	29	0	0	0
AFLA_083230	1	EQ963472	mitochondrial F1F0-ATP synthase g subunit, putative	-67.811	179	67.811	4	179	0	0	0	0	0
AFLA_083220	1	EQ963472	ATP dependent RNA helicase (Rok1), putative	-52.2973	314	67.811	4	179	0	0	0	0	0
AFLA_083210	1	EQ963472	conserved hypothetical protein	-47.8259	249	67.811	4	179	0	0	0	0	0
AFLA_083200	1	EQ963472	glucose-inducible SAM-dependent methyltransferase Rrg1, putative	52.8078	360	67.811	4	179	0	0	0	0	0
AFLA_083190	1	EQ963472	vacuolar protein sorting-associated protein Vps28, putative	76.8077	360	0	0	0	0	0	0	0	0
AFLA_083180	1	EQ963472	ribosome assembly protein Noc2, putative	25.2188	358	0	0	0	0	0	0	0	0
AFLA_083170	1	EQ963472	potassium transporter, putative	17.4634	189	0	0	0	0	0	0	0	0
AFLA_083160	1	EQ963472	molybdopterin cofactor biosynthetic protein	331.848	360	0	0	0	0	0	0	0	0
AFLA_083150	1	EQ963472	hypothetical protein	-10.9557	77	0	0	0	0	0	0	0	0
AFLA_083140	1	EQ963472	conserved hypothetical protein	486.417	360	486.417	4	360	0	0	0	0	0
AFLA_083130	1	EQ963472	ABC ATPase, putative	76.641	369	486.417	4	360	0	0	0	0	0
AFLA_083120	1	EQ963472	thioredoxin, putative	32.3473	223	486.417	4	360	0	0	0	0	0
AFLA_083110	1	EQ963472	conidiation-specific protein (Con-10), putative	-8.8417	333	486.417	4	360	0	0	0	0	0
AFLA_083100	1	EQ963472	bZIP transcription factor (LziP), putative	17.5873	197	0	0	0	0	0	0	0	0
AFLA_083090	1	EQ963472	tRNA processing endoribonuclease Trz1, putative	-57.1876	361	0	0	0	0	0	0	0	0
AFLA_083080	1	EQ963472	histidine acid phosphatase, putative	-76.8289	358	0	0	0	0	0	0	0	0
AFLA_083070	1	EQ963472	small monomeric GTPase (Gtr2), putative	-95.3376	358	0	0	0	0	0	0	0	0
AFLA_083060	1	EQ963472	heme/steroid binding domain protein, putative	54.1898	367	0	0	0	0	0	0	0	0
AFLA_083050	1	EQ963472	40S ribosomal protein S25, putative	-75.9919	361	0	0	0	0	0	0	0	0
AFLA_083040	1	EQ963472	WD40 domain protein	96.7493	367	0	0	0	0	0	0	0	0
AFLA_083030	1	EQ963472	dihydrouridine synthase family protein, putative	94.5473	367	0	0	0	0	0	0	0	0
AFLA_083020	1	EQ963472	conserved hypothetical protein	108.126	376	0	0	0	0	0	0	0	0
AFLA_083010	1	EQ963472	phosphatase, putative	-54.9841	358	0	0	0	0	0	0	0	0
AFLA_083000	1	EQ963472	MIF domain protein	37.1572	204	0	0	0	0	0	0	0	0
AFLA_082990	1	EQ963472	MIND kinetochore complex component Mtw1, putative	-62.5105	368	0	0	0	0	0	0	0	0
AFLA_082980	1	EQ963472	dihydroorotase, homodimeric type	-151.851	368	151.851	3	368	0	0	0	0	0
AFLA_082970	1	EQ963472	monocarboxylate permease homolog, mch4, putative	35.0491	275	151.851	3	368	0	0	0	0	0
AFLA_082960	1	EQ963472	conserved hypothetical protein	26.2367	159	151.851	3	368	0	0	0	0	0
AFLA_082950	1	EQ963472	DSBA family oxidoreductase, putative	17.0177	127	0	0	0	0	0	0	0	0
AFLA_082940	1	EQ963472	conserved hypothetical protein	21.0991	126	0	0	0	0	0	0	0	0
AFLA_082930	1	EQ963472	short chain dehydrogenase family protein	-47.3988	274	47.3988	3	274	0	0	0	0	0
AFLA_082920	1	EQ963472	conserved hypothetical protein	47.268	207	47.3988	3	274	0	0	0	0	0
AFLA_082910	1	EQ963472	C6 transcription factor, putative	9.93528	52	47.3988	3	274	0	0	1	0	0
AFLA_082900	1	EQ963472	Swr1p complex component (Swc5), putative	19.5714	272	0	0	0	0	0	0	0	0
AFLA_082890	1	EQ963472	ribonuclease T2, putative	11.1033	52	0	0	0	0	0	0	0	0
AFLA_082880	1	EQ963472	hypothetical protein	28.2526	272	0	0	0	0	0	0	0	0
AFLA_082870	1	EQ963472	GNAT family N-acetyltransferase, putative	29.9144	56	0	0	0	0	0	0	0	0
AFLA_082860	1	EQ963472	hypothetical protein	-32.4891	324	0	0	0	0	0	0	0	0
AFLA_082850	1	EQ963472	C2H2 type conidiation transcription factor BrlA	-2.40229	86	0	0	0	0	0	0	0	0
AFLA_082840	1	EQ963472	hypothetical protein	-36.5308	324	0	0	0	0	0	0	0	0
AFLA_082830	1	EQ963472	hypothetical protein	-43.1463	324	0	0	0	0	0	0	0	0
AFLA_082820	1	EQ963472	conserved hypothetical protein	-61.5029	324	0	0	0	0	0	0	0	0
AFLA_082810	1	EQ963472	conserved hypothetical protein	16.4558	155	0	0	0	0	0	0	0	0
AFLA_082800	1	EQ963472	hypothetical protein	75.9138	148	0	0	0	0	0	0	0	0
AFLA_082790	1	EQ963472	conserved hypothetical protein	-85.6929	324	0	0	0	0	0	0	0	0
AFLA_082780	1	EQ963472	4,5-DOPA dioxygenase extRadiol, putative	-103.883	303	0	0	0	0	0	0	0	0
AFLA_082770	1	EQ963472	conserved hypothetical protein	-132.489	291	0	0	0	0	0	0	0	0
AFLA_082760	1	EQ963472	allantoate permease, putative	-153.96	291	153.96	8	291	0	0	0	0	0
AFLA_082750	1	EQ963472	hypothetical protein	-54.4981	309	153.96	8	291	0	0	0	0	0
AFLA_082740	1	EQ963472	AMP dependent ligase, putative	-64.3223	324	153.96	8	291	0	0	0	0	0
AFLA_082730	1	EQ963472	conserved hypothetical protein	-74.5158	324	153.96	8	291	0	0	0	0	0
AFLA_082720	1	EQ963472	fatty acid elongase (Gig30), putative	-61.4534	324	153.96	8	291	0	0	0	0	0
AFLA_082710	1	EQ963472	conserved hypothetical protein	-66.7466	138	153.96	8	291	0	0	0	0	0
AFLA_082700	1	EQ963472	conserved hypothetical protein	-48.0377	324	153.96	8	291	0	0	0	0	0
AFLA_082690	1	EQ963472	pseudouridine synthase TruD/Pus7, putative	5.00047	177	153.96	8	291	0	0	0	0	0
AFLA_082680	1	EQ963472	conserved hypothetical protein	-25.1744	324	0	0	0	0	0	0	0	0
AFLA_082670	1	EQ963472	conserved hypothetical protein	-31.3741	324	0	0	0	0	0	0	0	0
AFLA_082660	1	EQ963472	conserved hypothetical protein	9.01873	207	0	0	0	0	0	0	0	0
AFLA_082650	1	EQ963472	conserved hypothetical protein	-35.8581	324	0	0	0	0	0	0	0	0
AFLA_082640	1	EQ963472	hypothetical protein	14.02	207	0	0	0	0	0	0	0	0
AFLA_082630	1	EQ963472	hypothetical protein	-41.3414	93	0	0	0	0	0	0	0	0
AFLA_082620	1	EQ963472	conserved hypothetical protein	18.9112	266	0	0	0	0	0	0	0	0
AFLA_082610	1	EQ963472	conserved hypothetical protein	-67.6688	324	0	0	0	0	0	0	0	0
AFLA_082600	1	EQ963472	PHD finger domain protein	-79.577	324	79.577	9	324	0	0	0	0	0
AFLA_082590	1	EQ963472	mitochondrial cation transporter, putative	-46.4736	69	79.577	9	324	0	0	0	0	0
AFLA_082580	1	EQ963472	amidase family protein, putative	-58.0926	69	79.577	9	324	0	0	0	0	0
AFLA_082570	1	EQ963472	protein kinase (Lkh1), putative	-26.9085	227	79.577	9	324	0	0	0	0	0
AFLA_082560	1	EQ963472	conserved hypothetical protein	36.0535	360	79.577	9	324	0	0	0	0	0
AFLA_082550	1	EQ963472	cleavage and polyadenylation specifity factor, 73 kDa subunit	44.0031	178	79.577	9	324	0	0	0	0	0
AFLA_082540	1	EQ963472	aminotransferase, class III	30.4224	178	79.577	9	324	0	0	0	0	0
AFLA_082530	1	EQ963472	signal recognition particle 19 kDa protein, putative	34.1101	262	79.577	9	324	0	0	0	0	0
AFLA_082520	1	EQ963472	C6 transcription factor, putative	26.2204	228	79.577	9	324	0	0	1	0	0
AFLA_082510	1	EQ963472	TCTP family protein	43.9856	262	0	0	0	0	0	0	0	0
AFLA_082500	1	EQ963472	sphinganine hydroxylase Sur2, putative	40.158	136	0	0	0	0	0	0	0	0
AFLA_082490	1	EQ963472	conserved hypothetical protein	51.2613	133	0	0	0	0	0	0	0	0
AFLA_082480	1	EQ963472	NRPS-like enzyme, putative	48.1632	262	0	0	0	NRPS	28	0	0	0
AFLA_082470	1	EQ963472	AMP dependent CoA ligase, putative	-83.516	227	0	0	0	NRPS	28	0	0	0
AFLA_082460	1	EQ963472	conserved hypothetical protein	-60.2569	221	0	0	0	NRPS	28	0	0	0
AFLA_082450	1	EQ963472	bicyclomycin resistance protein, putative	-93.2793	221	0	0	0	NRPS	28	0	0	0
AFLA_082440	1	EQ963472	conserved hypothetical protein	-153.266	221	0	0	0	NRPS	28	0	0	0
AFLA_082430	1	EQ963472	conserved hypothetical protein	-37.7521	174	0	0	0	NRPS	28	0	0	0
AFLA_082420	1	EQ963472	hypothetical protein	-250.261	359	250.261	3	359	NRPS	28	0	0	0
AFLA_082410	1	EQ963472	conserved hypothetical protein	-72.283	250	250.261	3	359	NRPS	28	0	0	0
AFLA_082400	1	EQ963472	ABC multidrug transporter, putative	-97.6344	304	250.261	3	359	NRPS	28	0	0	0
AFLA_082390	1	EQ963472	beta-xylosidase XylA	44.1935	56	0	0	0	0	0	0	0	0
AFLA_082380	1	EQ963472	alcohol dehydrogenase, putative	-110.963	292	0	0	0	0	0	0	0	0
AFLA_082370	1	EQ963472	conserved hypothetical protein	-175.96	304	0	0	0	0	0	0	0	0
AFLA_082360	1	EQ963472	conserved hypothetical protein	-39.0442	217	0	0	0	0	0	0	0	0
AFLA_082350	1	EQ963472	hypothetical protein	-183.371	304	0	0	0	0	0	0	0	0
AFLA_082340	1	EQ963472	DEAD/DEAH box helicase, putative	-199.252	265	0	0	0	0	0	0	0	0
AFLA_082330	1	EQ963472	phosphatidylinositol:UDP-GlcNAc transferase subunit PIG-A	-227.762	304	0	0	0	0	0	0	0	0
AFLA_082320	1	EQ963472	ADP-ribosylation factor family protein	-124.288	250	0	0	0	0	0	0	0	0
AFLA_082310	1	EQ963472	conserved hypothetical protein	-263.955	304	0	0	0	0	0	0	0	0
AFLA_082300	1	EQ963472	mRNA splicing factor (Prp18), putative	-301.61	304	0	0	0	0	0	0	0	0
AFLA_082290	1	EQ963472	Sin3-associated polypeptide Sap18, putative	-87.5423	276	0	0	0	0	0	0	0	0
AFLA_082280	1	EQ963472	glutathione S-transferase, putative	405.373	343	0	0	0	PKS	27	0	0	0
AFLA_082270	1	EQ963472	UDP-glucose dehydrogenase	-326.001	304	0	0	0	PKS	27	0	0	0
AFLA_082260	1	EQ963472	glycosyl transferase, putative	91.9708	69	0	0	0	PKS	27	0	0	0
AFLA_082250	1	EQ963472	GMC oxidoreductase, putative	-106.339	334	0	0	0	PKS	27	0	0	0
AFLA_082240	1	EQ963472	conserved hypothetical protein	-191.414	265	0	0	0	PKS	27	0	0	0
AFLA_082230	1	EQ963472	pantothenate transporter, putative	-140.919	234	0	0	0	PKS	27	0	0	0
AFLA_082220	1	EQ963472	short-chain dehydrogenase, putative	279.415	56	0	0	0	PKS	27	0	0	0
AFLA_082210	1	EQ963472	conserved hypothetical protein	585.477	56	0	0	0	PKS	27	0	0	0
AFLA_082200	1	EQ963472	AAA family ATPase, putative	177.275	57	0	0	0	PKS	27	0	0	0
AFLA_082190	1	EQ963472	conserved hypothetical protein	-544.137	265	0	0	0	PKS	27	0	0	0
AFLA_082180	1	EQ963472	hypothetical protein	-433.07	266	0	0	0	PKS	27	0	0	0
AFLA_082170	1	EQ963472	efflux pump antibiotic resistance protein, putative	-971.099	265	0	0	0	PKS	27	0	0	0
AFLA_082160	1	EQ963472	MFS glucose transporter, putative	-2012.14	265	2012.14	3	265	PKS	27	0	0	1
AFLA_082150	1	EQ963472	polyketide synthase, putative	-109.25	373	2012.14	3	265	PKS	27	0	0	0
AFLA_082140	1	EQ963472	hypothetical protein	3.73636	245	2012.14	3	265	0	0	0	0	0
AFLA_082130	1	EQ963472	hypothetical protein	-104.217	373	0	0	0	0	0	0	0	0
AFLA_082120	1	EQ963472	hypothetical protein	-42.169	361	0	0	0	0	0	0	0	0
AFLA_082110	1	EQ963472	wd40 protein, putative	37.2633	137	0	0	0	0	0	0	0	0
AFLA_082100	1	EQ963472	conserved hypothetical protein	-149.419	373	0	0	0	0	0	0	0	0
AFLA_082090	1	EQ963472	conserved hypothetical protein	-125.694	373	0	0	0	0	0	0	0	0
AFLA_082080	1	EQ963472	alpha/beta hydrolase, putative	-120.254	373	0	0	0	0	0	0	0	0
AFLA_082070	1	EQ963472	pantothenate transporter, putative	-112.554	373	0	0	0	0	0	0	0	0
AFLA_082060	1	EQ963472	conserved hypothetical protein	-118.839	373	0	0	0	0	0	0	0	0
AFLA_082050	1	EQ963472	epimerase/dehydratase family protein, putative	-107.315	373	0	0	0	0	0	0	0	0
AFLA_082040	1	EQ963472	DUF614 domain protein	-111.747	361	0	0	0	0	0	0	0	0
AFLA_082030	1	EQ963472	conserved hypothetical protein	-87.6066	373	0	0	0	0	0	0	0	0
AFLA_082020	1	EQ963472	hypothetical protein	-113.56	358	0	0	0	0	0	0	0	0
AFLA_082010	1	EQ963472	hypothetical protein	-195.316	361	195.316	3	361	0	0	0	0	0
AFLA_082000	1	EQ963472	hypothetical protein	-105.08	220	195.316	3	361	0	0	0	0	0
AFLA_081990	1	EQ963472	conserved hypothetical protein	-72.2973	276	195.316	3	361	0	0	0	0	0
AFLA_081980	1	EQ963472	ferulic acid esterase (FaeA), putative	105.161	123	0	0	0	0	0	0	0	0
AFLA_081970	1	EQ963472	conserved hypothetical protein	136.282	122	0	0	0	0	0	0	0	0
AFLA_081960	1	EQ963472	hypothetical protein	150.088	178	0	0	0	0	0	0	0	0
AFLA_081950	1	EQ963472	monooxygenase, putative	229.777	122	0	0	0	0	0	0	0	0
AFLA_081940	1	EQ963472	acetyltransferase, GNAT family	328.416	107	0	0	0	0	0	0	0	0
AFLA_081930	1	EQ963472	conserved hypothetical protein	608.797	313	608.797	3	313	0	0	0	0	0
AFLA_081920	1	EQ963472	ZIP Zinc transporter, putative	138.517	20	608.797	3	313	0	0	0	0	0
AFLA_081910	1	EQ963472	major allergen Asp F2	-107.131	374	608.797	3	313	0	0	0	0	0
AFLA_081900	1	EQ963472	hypothetical protein	215.108	126	0	0	0	0	0	0	0	0
AFLA_081890	1	EQ963472	conserved hypothetical protein	102.958	343	0	0	0	0	0	0	0	0
AFLA_081880	1	EQ963472	branched-chain amino acid aminotransferase	-45.6033	167	0	0	0	0	0	0	0	0
AFLA_081870	1	EQ963472	conserved serine-rich protein	78.0553	127	0	0	0	0	0	0	0	0
AFLA_081860	1	EQ963472	protein kinase and ribonuclease Ire1, putative	104.631	127	0	0	0	0	0	0	0	0
AFLA_081850	1	EQ963472	PKS-like enzyme, putative	658.028	126	0	0	0	0	0	0	0	0
AFLA_081840	1	EQ963472	esterase, putative	703.713	126	703.713	7	126	0	0	0	0	0
AFLA_081830	1	EQ963472	conserved hypothetical protein	521.986	126	703.713	7	126	0	0	0	0	0
AFLA_081820	1	EQ963472	glycosyl hydrolase, putative	399.4	126	703.713	7	126	0	0	0	0	0
AFLA_081810	1	EQ963472	muramidase, putative	417.813	126	703.713	7	126	0	0	0	0	0
AFLA_081800	1	EQ963472	conserved hypothetical protein	650.064	126	703.713	7	126	0	0	0	0	0
AFLA_081790	1	EQ963472	phenol 2-monooxygenase, putative	101.219	142	703.713	7	126	0	0	0	0	0
AFLA_081780	1	EQ963472	hypothetical protein	21.299	363	703.713	7	126	0	0	0	0	0
AFLA_081770	1	EQ963472	conserved hypothetical protein	7.557	157	0	0	0	0	0	0	0	0
AFLA_081760	1	EQ963472	hypothetical protein	-26.6004	189	0	0	0	0	0	0	0	0
AFLA_081750	1	EQ963472	t-complex protein 1, beta subunit, putative	-11.0431	56	0	0	0	0	0	0	0	0
AFLA_081740	1	EQ963472	peptidyl-prolyl cis-trans isomerase, putative	35.1717	358	0	0	0	0	0	0	0	0
AFLA_081730	1	EQ963472	integral membrane protein	-66.7374	189	0	0	0	0	0	0	0	0
AFLA_081720	1	EQ963472	conserved hypothetical protein	38.2773	148	0	0	0	0	0	0	0	0
AFLA_081710	1	EQ963472	hypothetical protein	-162.879	189	0	0	0	0	0	0	0	0
AFLA_081700	1	EQ963472	RTA1 domain protein, putative	96.5472	358	0	0	0	0	0	0	0	0
AFLA_081690	1	EQ963472	hypothetical protein	28.9738	360	0	0	0	0	0	0	0	0
AFLA_081680	1	EQ963472	conserved hypothetical protein	111.044	358	0	0	0	0	0	0	0	0
AFLA_081670	1	EQ963472	acid phosphatase, putative	146.941	358	0	0	0	0	0	0	0	0
AFLA_081660	1	EQ963472	hypothetical protein	78.5715	352	0	0	0	0	0	0	0	0
AFLA_081650	1	EQ963472	conserved hypothetical protein	86.6842	159	0	0	0	0	0	0	0	0
AFLA_081640	1	EQ963472	short chain type dehydrogenase, putative	-27.7069	359	0	0	0	0	0	0	0	0
AFLA_081630	1	EQ963472	carboxyl ester lipase, zebrafish, putative	-57.0898	288	0	0	0	0	0	0	0	0
AFLA_081620	1	EQ963472	conserved hypothetical protein	-38.2987	361	0	0	0	0	0	0	0	0
AFLA_081610	1	EQ963472	conserved hypothetical protein	48.5851	302	0	0	0	0	0	0	0	0
AFLA_081600	1	EQ963472	C6 finger domain protein, putative	-146.761	288	0	0	0	0	0	1	0	0
AFLA_081590	1	EQ963472	hypothetical protein	-196.675	288	0	0	0	0	0	0	0	0
AFLA_081580	1	EQ963472	conserved hypothetical protein	-258.516	288	0	0	0	0	0	0	0	0
AFLA_081570	1	EQ963472	AMP dependent ligase/synthetase, putative	110.559	81	0	0	0	0	0	0	0	0
AFLA_081560	1	EQ963472	presequence translocase-associated motor subunit Pam17, putative	-336.625	288	336.625	3	288	0	0	0	0	0
AFLA_081550	1	EQ963472	enoyl-CoA hydratase/isomerase family protein	-103.926	329	336.625	3	288	0	0	0	0	0
AFLA_081540	1	EQ963472	integral membrane protein	-99.8354	346	336.625	3	288	0	0	0	0	0
AFLA_081530	1	EQ963472	hypothetical protein	-311.58	308	0	0	0	0	0	0	0	0
AFLA_081520	1	EQ963472	conserved hypothetical protein	215.604	277	0	0	0	0	0	0	0	0
AFLA_081510	1	EQ963472	conserved hypothetical protein	416.333	277	416.333	3	277	0	0	0	0	0
AFLA_081500	1	EQ963472	conserved hypothetical protein	-84.8132	138	416.333	3	277	0	0	0	0	0
AFLA_081490	1	EQ963472	nucleoside diphosphatase Gda1	-31.649	126	416.333	3	277	0	0	0	0	0
AFLA_081480	1	EQ963472	IgE-binding protein	-32.1116	126	0	0	0	0	0	0	0	0
AFLA_081470	1	EQ963472	ribosome biogenesis protein Rsa4, putative	15.3254	375	0	0	0	0	0	0	0	0
AFLA_081460	1	EQ963472	DNA mismatch repair protein Msh4, putative	35.5159	363	0	0	0	0	0	0	0	0
AFLA_081450	1	EQ963472	C2H2 finger domain protein, putative	26.0269	225	0	0	0	0	0	0	0	0
AFLA_081440	1	EQ963472	SWIB/MDM2 domain protein	-16.0664	146	0	0	0	0	0	0	0	0
AFLA_081430	1	EQ963472	eukaryotic translation initiation factor 3 subunit EifCb, putative	39.6218	363	0	0	0	0	0	0	0	0
AFLA_081420	1	EQ963472	extracellular SCP domain protein Pry1, putative	49.7725	363	0	0	0	0	0	0	0	0
AFLA_081410	1	EQ963472	secretion pathway protein Sls2/Rcy1, putative	9.40492	179	0	0	0	0	0	0	0	0
AFLA_081390	1	EQ963472	pachytene checkpoint component Pch2, putative	-11.7526	82	0	0	0	0	0	0	0	0
AFLA_081380	1	EQ963472	cytochrome C1/Cyt1, putative	-29.772	129	0	0	0	0	0	0	0	0
AFLA_081370	1	EQ963472	conserved hypothetical protein	49.1075	363	0	0	0	0	0	0	0	0
AFLA_081360	1	EQ963472	Phe-inhibited DAHP synthase AroG	44.8729	363	0	0	0	0	0	0	0	0
AFLA_081350	1	EQ963472	DUF221 domain protein, putative	45.4952	363	0	0	0	0	0	0	0	0
AFLA_081340	1	EQ963472	glycogen debranching enzyme Gdb1, putative	-46.7152	69	0	0	0	0	0	0	0	0
AFLA_081330	1	EQ963472	glycerol 3-phosphate dehydrogenase (GfdA), putative	-63.1133	69	0	0	0	0	0	0	0	0
AFLA_081320	1	EQ963472	conserved hypothetical protein	-67.1607	60	0	0	0	0	0	0	0	0
AFLA_081310	1	EQ963472	ATP-dependent Clp protease, putative	68.498	216	68.498	3	216	0	0	0	0	0
AFLA_081300	1	EQ963472	Chromo domain protein Chp1p, putative	35.3833	290	68.498	3	216	0	0	0	0	0
AFLA_081290	1	EQ963472	hypothetical protein	13.3279	158	68.498	3	216	0	0	0	0	0
AFLA_081280	1	EQ963472	Ras GTPase Rab11, putative	20.6857	152	0	0	0	0	0	0	0	0
AFLA_081270	1	EQ963472	F-box domain protein	32.3642	152	0	0	0	0	0	0	0	0
AFLA_081260	1	EQ963472	60S ribosome biogenesis protein Brx1, putative	27.0877	56	0	0	0	0	0	0	0	0
AFLA_081250	1	EQ963472	ketohexokinase, putative	-51.7472	81	51.7472	4	81	0	0	0	0	0
AFLA_081240	1	EQ963472	conserved hypothetical protein	-50.1611	80	51.7472	4	81	0	0	0	0	0
AFLA_081230	1	EQ963472	conserved hypothetical protein	41.7666	159	51.7472	4	81	0	0	0	0	0
AFLA_081220	1	EQ963472	conserved hypothetical protein	16.4706	93	51.7472	4	81	0	0	0	0	0
AFLA_081210	1	EQ963472	ARS binding protein Abp2, putative	20.6106	56	0	0	0	0	0	0	0	0
AFLA_081200	1	EQ963472	hypothetical protein	27.5152	56	0	0	0	0	0	0	0	0
AFLA_081190	1	EQ963472	conserved hypothetical protein	81.3673	61	0	0	0	0	0	0	0	0
AFLA_081180	1	EQ963472	conserved hypothetical protein	169.375	54	169.375	3	54	0	0	0	0	0
AFLA_081170	1	EQ963472	conserved hypothetical protein	55.8801	159	169.375	3	54	0	0	0	0	0
AFLA_081160	1	EQ963472	conserved hypothetical protein	20.3163	313	169.375	3	54	0	0	0	0	0
AFLA_081150	1	EQ963472	conserved hypothetical protein	51.6642	363	51.6642	3	363	0	0	0	0	0
AFLA_081140	1	EQ963472	conserved hypothetical protein	31.3973	225	51.6642	3	363	0	0	0	0	0
AFLA_081130	1	EQ963472	C2H2 type zinc finger domain protein	-24.2272	82	51.6642	3	363	0	0	0	0	0
AFLA_081120	1	EQ963472	hypothetical protein	30.2576	359	0	0	0	0	0	0	0	0
AFLA_081110	1	EQ963472	MFS transporter, putative	-32.9226	372	0	0	0	0	0	0	0	1
AFLA_081100	1	EQ963472	conserved hypothetical protein	38.3109	359	0	0	0	0	0	0	0	0
AFLA_081090	1	EQ963472	fumarylacetoacetate hydrolase family protein	-40.3616	370	0	0	0	0	0	0	0	0
AFLA_081080	1	EQ963472	hypothetical protein	60.5845	359	0	0	0	0	0	0	0	0
AFLA_081070	1	EQ963472	conserved hypothetical protein	-67.1391	136	67.1391	3	136	0	0	0	0	0
AFLA_081060	1	EQ963472	alpha/beta hydrolase, putative	-28.4882	59	67.1391	3	136	0	0	0	0	0
AFLA_081050	1	EQ963472	paramyosin, putative	10.705	196	67.1391	3	136	0	0	0	0	0
AFLA_081040	1	EQ963472	AAA family ATPase Rvb2/Reptin, putative	25.9057	228	0	0	0	0	0	0	0	0
AFLA_081030	1	EQ963472	conserved hypothetical protein	34.5088	228	0	0	0	0	0	0	0	0
AFLA_081020	1	EQ963472	ubiquitin fusion degradation protein Ufd1, putative	78.0872	228	0	0	0	0	0	0	0	0
AFLA_081010	1	EQ963472	indole-diterpene biosynthesis protein PaxU, putative	46.0041	226	0	0	0	0	0	0	0	0
AFLA_081000	1	EQ963472	DNA-directed RNA polymerase III, beta subunit, putative	87.7578	226	87.7578	3	226	0	0	0	0	0
AFLA_080990	1	EQ963472	MFS sugar transporter, putative	-7.10818	147	87.7578	3	226	0	0	0	0	1
AFLA_080980	1	EQ963472	conserved hypothetical protein	-14.6921	323	87.7578	3	226	0	0	0	0	0
AFLA_080970	1	EQ963472	RNA-binding protein, putative	-22.9618	8	0	0	0	0	0	0	0	0
AFLA_080960	1	EQ963472	origin recognition complex subunit Orc5, putative	-44.2651	93	0	0	0	0	0	0	0	0
AFLA_080950	1	EQ963472	conserved hypothetical protein	-28.7148	27	0	0	0	0	0	0	0	0
[truncated: 12,024 more rows]

## Sheet: condition
	F.verticillioides			A.flavus
[truncated: 410 more rows]

[truncated: 2 more sheets: ust, antiSMASH.AF]
